# Supplementary material for: Structure-guided isoform identification for the human transcriptome
Source: eLife. 2022 Dec 15;11:e82556. doi: 10.7554/eLife.82556 (PMC9812405; doi:10.7554/eLife.82556)
Supplement: Supplementary file 1. — Folding scores from ColabFold for each transcript from a preliminary new build of the Comprehensive Human Expressed SequenceS (CHESS) database that contained a protein-coding sequence (CDS) that was under 1000aa in length. For transcripts already contained in the released CHESS v3.0 database, the identifier from that database is provided. If the transcript maps to a known gene locus X but is a novel isoform, it is shown with the identifier CHS.X.altY. If a transcript occurs at a novel locus X, the identifier is hypothetical.X.Y, where Y identifies the isoform number. Additional columns show the gene name, the RefSeq ID (release 110), the GENCODE ID (release 40), the predicted local distance difference test (pLDDT) (folding) score, and a flag indicating whether all intron boundaries (for multi-exon genes) are conserved in the mouse genome. [file elife-82556-supp1.csv]

CHESS ID	GENE	RefSeq ID	GENCODE ID	pLDDT	introns in mouse
CHS.10000.1	NCAM1	NM_001076682.4	ENST00000621850.4	85.1	TRUE
CHS.10000.10	NCAM1	NM_001386291.1	ENST00000401611.6	87.9	TRUE
CHS.10000.2	NCAM1	NM_001242608.2	ENST00000621128.4	87.5	TRUE
CHS.10000.3	NCAM1	NM_001242607.2	ENST00000619839.4	79.5	FALSE
CHS.10000.38	NCAM1	-	-	81.3	TRUE
CHS.10000.4	NCAM1	NM_181351.5	ENST00000316851.12	81.5	TRUE
CHS.10000.40	NCAM1	-	-	86.9	TRUE
CHS.10000.42	NCAM1	-	-	87.4	TRUE
CHS.10000.43	NCAM1	-	-	84.9	TRUE
CHS.10000.44	NCAM1	-	-	85.2	TRUE
CHS.10000.45	NCAM1	NM_001400605.1	-	84.9	TRUE
CHS.10000.46	NCAM1	NM_001386289.1	-	87.2	TRUE
CHS.10000.49	NCAM1	-	-	88.3	TRUE
CHS.10000.5	NCAM1	NM_000615.7	ENST00000531044.5	82	TRUE
CHS.10000.51	NCAM1	-	ENST00000611284.4	81.3	TRUE
CHS.10000.57	NCAM1	NM_001400616.1	-	79.4	FALSE
CHS.10000.58	NCAM1	NM_001400621.1	-	79.2	TRUE
CHS.10000.59	NCAM1	NM_001400615.1	-	81.1	TRUE
CHS.10000.6	NCAM1	NM_001386292.1	-	81.7	TRUE
CHS.10000.61	NCAM1	NM_001400623.1	-	79.7	TRUE
CHS.10000.63	NCAM1	NM_001400618.1	-	81.2	TRUE
CHS.10000.65	NCAM1	NM_001400622.1	-	81.3	TRUE
CHS.10000.66	NCAM1	NM_001400614.1	-	63.7	TRUE
CHS.10000.67	NCAM1	NM_001400619.1	-	79.5	TRUE
CHS.10000.68	NCAM1	NM_001400612.1	-	82.8	FALSE
CHS.10000.69	NCAM1	NM_001400609.1	-	84.6	TRUE
CHS.10000.70	NCAM1	NM_001400608.1	-	85.1	TRUE
CHS.10000.71	NCAM1	NM_001400604.1	-	86.3	TRUE
CHS.10000.72	NCAM1	NM_001400607.1	-	85.3	TRUE
CHS.10000.73	NCAM1	NM_001400603.1	-	85.8	TRUE
CHS.10000.74	NCAM1	NM_001400610.1	-	88.1	FALSE
CHS.10000.75	NCAM1	NM_001400606.1	-	86	TRUE
CHS.10000.76	NCAM1	NM_001400611.1	-	84.4	TRUE
CHS.10000.77	NCAM1	NM_001400613.1	-	88.3	TRUE
CHS.10000.9	NCAM1	NM_001386290.1	-	81.2	TRUE
CHS.10000.alt100	NCAM1		-	85.3	TRUE
CHS.10000.alt101	NCAM1		-	84.9	TRUE
CHS.10000.alt102	NCAM1	NM_181351.5	ENST00000316851.12	81.5	TRUE
CHS.10000.alt103	NCAM1		ENST00000529356.5	85.3	TRUE
CHS.10000.alt104	NCAM1		-	89	TRUE
CHS.10000.alt105	NCAM1		-	82.5	TRUE
CHS.10000.alt106	NCAM1		ENST00000526322.5	75.8	TRUE
CHS.10000.alt107	NCAM1		ENST00000533073.5	73.8	TRUE
CHS.10000.alt108	NCAM1		ENST00000524916.1	34.6	FALSE
CHS.10000.alt109	NCAM1		ENST00000530090.1	36.2	TRUE
CHS.10000.alt110	NCAM1		ENST00000528158.2	45.6	TRUE
CHS.10000.alt111	NCAM1		-	41.8	TRUE
CHS.10000.alt112	NCAM1		-	42.3	TRUE
CHS.10003.1	TTC12	NM_001318533.2	-	87.8	FALSE
CHS.10003.10	TTC12	NM_001378064.1	-	90.2	TRUE
CHS.10003.2	TTC12	-	-	87.5	FALSE
CHS.10003.3	TTC12	NM_017868.4	ENST00000529221.6	90.2	TRUE
CHS.10003.4	TTC12	-	-	82.9	FALSE
CHS.10003.49	TTC12	NM_001352037.2	-	90.3	TRUE
CHS.10003.5	TTC12	-	-	83.1	FALSE
CHS.10003.50	TTC12	-	-	84.6	FALSE
CHS.10003.52	TTC12	NR_147891.2	ENST00000494714.5	86.4	FALSE
CHS.10003.6	TTC12	-	-	84.4	FALSE
CHS.10003.61	TTC12	NR_165393.1	-	84.3	FALSE
CHS.10003.62	TTC12	NR_165392.1	-	92.8	FALSE
CHS.10003.63	TTC12	NM_001378063.1	-	87.1	FALSE
CHS.10003.7	TTC12	-	-	84.4	FALSE
CHS.10003.9	TTC12	NM_001378065.1	-	90.2	FALSE
CHS.10003.alt100	TTC12		-	83.6	TRUE
CHS.10003.alt101	TTC12	XM_017017945.1	-	82.9	FALSE
CHS.10003.alt102	TTC12		-	86.4	FALSE
CHS.10003.alt103	TTC12		ENST00000531164.5	85.3	TRUE
CHS.10003.alt104	TTC12	NM_017868.4	ENST00000529221.6	90.2	TRUE
CHS.10003.alt105	TTC12	NR_147891.2	ENST00000494714.5	86.4	FALSE
CHS.10003.alt106	TTC12		ENST00000464224.5	83.8	FALSE
CHS.10003.alt107	TTC12	XM_017017944.2	-	82.9	FALSE
CHS.10003.alt108	TTC12	XM_017017946.1	-	82.9	FALSE
CHS.10003.alt109	TTC12	XM_005271604.3	-	82.9	FALSE
CHS.10003.alt110	TTC12		ENST00000314756.7	86.4	FALSE
CHS.10003.alt111	TTC12		ENST00000527781.1	81.3	TRUE
CHS.10003.alt112	TTC12		ENST00000525989.1	90.3	TRUE
CHS.10003.alt113	TTC12		ENST00000534793.1	50.8	TRUE
CHS.10003.alt114	TTC12		ENST00000478125.1	91.3	TRUE
CHS.10003.alt115	TTC12		ENST00000480233.1	85.1	FALSE
CHS.10004.1	ANKK1	XM_011542736.3	-	81.4	FALSE
CHS.10004.12	ANKK1	-	-	82.7	FALSE
CHS.10004.13	ANKK1	-	-	82.1	FALSE
CHS.10004.2	ANKK1	XM_017017475.2	-	80.7	FALSE
CHS.10004.3	ANKK1	XM_011542737.3	-	81.4	TRUE
CHS.10004.4	ANKK1	NM_178510.2	ENST00000303941.4	82	TRUE
CHS.10004.5	ANKK1	XM_011542738.2	-	83	FALSE
CHS.10004.alt100	ANKK1	NM_178510.2	ENST00000303941.4	82	TRUE
CHS.10004.alt101	ANKK1		ENST00000542948.1	53.9	TRUE
CHS.10004.alt102	ANKK1		-	82.8	FALSE
CHS.10004.alt103	ANKK1		-	88.8	FALSE
CHS.10005.10	DRD2	-	ENST00000544518.5	70.4	FALSE
CHS.10005.19	DRD2	-	-	68.8	FALSE
CHS.10005.3	DRD2	NM_016574.4	ENST00000346454.7	73.4	FALSE
CHS.10005.4	DRD2	NM_000795.4	ENST00000362072.8	68.8	FALSE
CHS.10005.alt100	DRD2		-	68.8	FALSE
CHS.10005.alt101	DRD2		-	68.8	FALSE
CHS.10005.alt102	DRD2		-	68.8	FALSE
CHS.10005.alt103	DRD2	NM_000795.4	ENST00000362072.8	68.8	FALSE
CHS.10005.alt104	DRD2	XM_017017296.2	-	68.8	FALSE
CHS.10005.alt105	DRD2		-	73.4	FALSE
CHS.10005.alt106	DRD2		ENST00000542968.5	68.8	FALSE
CHS.10005.alt107	DRD2		ENST00000535984.1	63.6	TRUE
CHS.10005.alt108	DRD2		ENST00000539420.1	65	FALSE
CHS.10008.10	TMPRSS5	NM_001288751.2	ENST00000545579.6	79.3	FALSE
CHS.10008.27	TMPRSS5	-	-	65	TRUE
CHS.10008.4	TMPRSS5	NR_110047.2	ENST00000536856.5	84	FALSE
CHS.10008.5	TMPRSS5	NR_110046.2	ENST00000540540.5	90.9	FALSE
CHS.10008.6	TMPRSS5	NM_001288749.2	ENST00000544476.1	69.3	TRUE
CHS.10008.7	TMPRSS5	NM_001288750.2	ENST00000538955.5	83.1	FALSE
CHS.10008.8	TMPRSS5	NM_001288752.2	ENST00000544634.5	68.3	TRUE
CHS.10008.9	TMPRSS5	NM_030770.4	ENST00000299882.11	79	FALSE
CHS.10008.alt100	TMPRSS5		-	82.7	FALSE
CHS.10008.alt101	TMPRSS5		-	82.7	FALSE
CHS.10008.alt102	TMPRSS5		-	67.6	TRUE
CHS.10008.alt103	TMPRSS5	XM_017018366.1	-	82.7	TRUE
CHS.10008.alt104	TMPRSS5	XR_001747992.1	-	82.7	TRUE
CHS.10008.alt105	TMPRSS5	XM_017018367.1	-	82.7	TRUE
CHS.10008.alt106	TMPRSS5	XR_001747990.1	-	82.7	TRUE
CHS.10008.alt107	TMPRSS5	XR_001747991.1	-	64.9	FALSE
CHS.10008.alt108	TMPRSS5		-	86.9	TRUE
CHS.10008.alt109	TMPRSS5		-	83.1	FALSE
CHS.10008.alt110	TMPRSS5	NR_110047.2	ENST00000536856.5	84	FALSE
CHS.10008.alt111	TMPRSS5	NM_030770.4	ENST00000299882.11	79	FALSE
CHS.10008.alt112	TMPRSS5	NR_110046.2	ENST00000540540.5	90.9	FALSE
CHS.10008.alt113	TMPRSS5		-	82.7	TRUE
CHS.10008.alt114	TMPRSS5		-	77	FALSE
CHS.10008.alt115	TMPRSS5		-	82.7	TRUE
CHS.10008.alt116	TMPRSS5		-	82.7	FALSE
CHS.10008.alt117	TMPRSS5		-	50.8	TRUE
CHS.10008.alt118	TMPRSS5		ENST00000545265.5	86	FALSE
CHS.10008.alt119	TMPRSS5		ENST00000538091.1	64.9	FALSE
CHS.10009.1	ZW10	XM_017018558.3	-	77.6	TRUE
CHS.10009.2	ZW10	-	-	84.3	TRUE
CHS.10009.3	ZW10	NM_004724.4	ENST00000200135.8	77.3	TRUE
CHS.10009.7	ZW10	-	ENST00000535142.5	77	TRUE
CHS.10009.alt100	ZW10	XM_017018559.2	-	84.3	TRUE
CHS.10009.alt101	ZW10		-	90.1	TRUE
CHS.10009.alt102	ZW10	NM_004724.4	ENST00000200135.8	77.3	TRUE
CHS.10009.alt103	ZW10		-	83	TRUE
CHS.10009.alt104	ZW10		ENST00000538209.1	74	TRUE
CHS.1001.1	GMEB1	NM_006582.4	ENST00000294409.2	53.2	TRUE
CHS.1001.2	GMEB1	NM_001319674.2	ENST00000373816.6	54	TRUE
CHS.1001.3	GMEB1	NM_024482.3	ENST00000361872.8	54	TRUE
CHS.1001.4	GMEB1	XM_011540519.3	-	53.2	TRUE
CHS.1001.alt100	GMEB1		-	53.2	FALSE
CHS.1001.alt101	GMEB1	NM_001319674.2	ENST00000373816.6	54	TRUE
CHS.1001.alt102	GMEB1	XM_011540522.3	-	54.1	TRUE
CHS.1001.alt103	GMEB1		-	53.2	FALSE
CHS.1001.alt104	GMEB1		-	53.2	FALSE
CHS.1001.alt105	GMEB1	XM_017000087.1	-	53.2	FALSE
CHS.1001.alt106	GMEB1	XM_011540518.2	-	53.2	FALSE
CHS.1001.alt107	GMEB1		-	54	FALSE
CHS.1001.alt108	GMEB1	XM_011540521.3	-	54	FALSE
CHS.1001.alt109	GMEB1		-	53.2	FALSE
CHS.1001.alt110	GMEB1		ENST00000480454.1	53.2	TRUE
CHS.1001.alt111	GMEB1		-	54.1	TRUE
CHS.1001.alt112	GMEB1		-	54.2	FALSE
CHS.10010.1	CLDN25	NM_001101389.1	ENST00000453129.3	80.6	TRUE
CHS.10010.alt100	CLDN25	NM_001101389.1	ENST00000453129.2	80.6	no_introns
CHS.10011.10	USP28	NM_001346263.2	-	71.7	FALSE
CHS.10011.12	USP28	NM_001346270.2	-	76.6	FALSE
CHS.10011.14	USP28	NM_001346271.2	-	76.6	FALSE
CHS.10011.25	USP28	NM_001301029.2	ENST00000545540.5	77.8	FALSE
CHS.10011.26	USP28	NM_001346261.2	-	76.4	FALSE
CHS.10011.28	USP28	NM_001346260.2	-	75.8	FALSE
CHS.10011.30	USP28	NM_020886.4	ENST00000003302.8	73.7	FALSE
CHS.10011.33	USP28	NM_001400802.1	-	77.2	FALSE
CHS.10011.40	USP28	NM_001346273.2	ENST00000537706.5	70.8	FALSE
CHS.10011.53	USP28	NM_001346262.2	-	77.8	FALSE
CHS.10011.55	USP28	NM_001346268.2	-	75.8	FALSE
CHS.10011.56	USP28	NM_001346264.2	-	70.9	FALSE
CHS.10011.57	USP28	NM_001346267.2	-	75.8	FALSE
CHS.10011.58	USP28	NM_001346265.2	-	72	FALSE
CHS.10011.59	USP28	NM_001346269.2	-	76.6	FALSE
CHS.10011.61	USP28	NR_174609.1	ENST00000540438.5	82.4	FALSE
CHS.10011.62	USP28	NM_001400807.1	-	74.5	FALSE
CHS.10011.63	USP28	NM_001400809.1	-	74.4	FALSE
CHS.10011.64	USP28	NM_001400813.1	-	78.1	FALSE
CHS.10011.65	USP28	NM_001400799.1	-	78.1	FALSE
CHS.10011.66	USP28	NM_001400810.1	-	77.6	FALSE
CHS.10011.67	USP28	NM_001346272.2	-	78.6	FALSE
CHS.10011.68	USP28	NM_001400801.1	-	77.2	FALSE
CHS.10011.70	USP28	NM_001400793.1	-	72.8	FALSE
CHS.10011.72	USP28	NM_001400805.1	-	78.3	FALSE
CHS.10011.73	USP28	NM_001400800.1	-	74.4	FALSE
CHS.10011.76	USP28	NM_001400803.1	-	78.1	FALSE
CHS.10011.77	USP28	NM_001400792.1	-	74.4	FALSE
CHS.10011.79	USP28	NM_001400812.1	-	75.2	FALSE
CHS.10011.80	USP28	NM_001400806.1	-	78.6	FALSE
CHS.10011.82	USP28	NM_001400811.1	-	77.2	FALSE
CHS.10011.83	USP28	NM_001400804.1	-	78.1	FALSE
CHS.10011.84	USP28	NM_001400794.1	-	69.6	FALSE
CHS.10011.alt100	USP28		-	78.1	FALSE
CHS.10011.alt101	USP28		-	78.1	FALSE
CHS.10011.alt102	USP28		-	71.7	FALSE
CHS.10011.alt103	USP28		-	78.1	FALSE
CHS.10011.alt104	USP28		-	78.6	FALSE
CHS.10011.alt105	USP28		-	77.2	FALSE
CHS.10011.alt106	USP28		-	77.8	FALSE
CHS.10011.alt107	USP28		-	71.7	FALSE
CHS.10011.alt108	USP28		-	77.2	FALSE
CHS.10011.alt109	USP28		-	77.2	FALSE
CHS.10011.alt110	USP28		ENST00000544967.5	77.9	FALSE
CHS.10011.alt111	USP28		-	82.4	FALSE
CHS.10011.alt112	USP28		ENST00000544272.1	81.4	TRUE
CHS.10011.alt113	USP28		ENST00000542033.5	67.2	TRUE
CHS.10013.13	HTR3B	-	-	66.8	FALSE
CHS.10013.2	HTR3B	NM_006028.5	ENST00000260191.8	82.5	TRUE
CHS.10013.4	HTR3B	NM_001363563.2	ENST00000537778.5	82	TRUE
CHS.10013.5	HTR3B	-	-	84.7	TRUE
CHS.10013.alt100	HTR3B	XM_024448767.1	-	81.4	FALSE
CHS.10013.alt101	HTR3B	NM_006028.5	ENST00000260191.7	82.5	TRUE
CHS.10013.alt102	HTR3B		-	81.4	FALSE
CHS.10013.alt103	HTR3B		-	78.5	FALSE
CHS.10013.alt104	HTR3B		-	81.5	FALSE
CHS.10013.alt105	HTR3B		-	82.2	TRUE
CHS.10013.alt106	HTR3B	XR_001748034.2	-	84.7	TRUE
CHS.10013.alt107	HTR3B	XM_017018552.2	-	81.5	FALSE
CHS.10013.alt108	HTR3B		ENST00000543092.1	83.9	TRUE
CHS.10013.alt109	HTR3B		-	66.8	FALSE
CHS.10014.1	HTR3A	NM_213621.4	ENST00000355556.6	78.6	TRUE
CHS.10014.2	HTR3A	NM_000869.6	ENST00000504030.7	81.6	TRUE
CHS.10014.3	HTR3A	NR_046363.2	ENST00000510849.5	67.7	TRUE
CHS.10014.4	HTR3A	NM_001161772.3	ENST00000299961.5	81.7	FALSE
CHS.10014.alt100	HTR3A		-	73.4	TRUE
CHS.10014.alt101	HTR3A	NM_213621.4	ENST00000506841.6	78.6	TRUE
CHS.10014.alt102	HTR3A	NM_000869.6	ENST00000504030.7	81.6	TRUE
CHS.10014.alt103	HTR3A	NR_046363.2	ENST00000510849.5	67.7	TRUE
CHS.10014.alt104	HTR3A		-	68.4	TRUE
CHS.10014.alt105	HTR3A		-	64.7	TRUE
CHS.10019.11	NNMT	NM_001372046.1	-	95	FALSE
CHS.10019.14	NNMT	NM_001372045.1	-	95	FALSE
CHS.10019.16	NNMT	NM_006169.3	ENST00000299964.4	95	TRUE
CHS.10019.23	NNMT	-	-	95	FALSE
CHS.10019.25	NNMT	-	-	92.3	FALSE
CHS.10019.26	NNMT	-	-	95	FALSE
CHS.10019.27	NNMT	NR_164073.1	-	92.3	FALSE
CHS.10019.4	NNMT	NM_001372047.1	ENST00000535401.5	95	FALSE
CHS.10019.alt100	NNMT		-	95	FALSE
CHS.10019.alt101	NNMT		-	95	FALSE
CHS.10019.alt102	NNMT		-	92.3	FALSE
CHS.10019.alt103	NNMT	NR_164073.1	-	92.3	FALSE
CHS.10019.alt104	NNMT		-	95	FALSE
CHS.10019.alt105	NNMT	NM_006169.3	ENST00000299964.4	95	TRUE
CHS.10019.alt106	NNMT		ENST00000541754.1	92.3	FALSE
CHS.10019.alt107	NNMT		ENST00000545255.1	92.3	FALSE
CHS.1002.1	YTHDF2	NM_001173128.2	ENST00000542507.5	53.9	FALSE
CHS.1002.5	YTHDF2	NM_016258.3	ENST00000373812.8	53.9	TRUE
CHS.1002.8	YTHDF2	NM_001172828.2	ENST00000541996.5	55.9	TRUE
CHS.1002.alt100	YTHDF2	NM_016258.3	ENST00000373812.8	53.9	TRUE
CHS.1002.alt101	YTHDF2		-	65.3	TRUE
CHS.1002.alt102	YTHDF2		ENST00000478283.5	55.9	TRUE
CHS.10020.12	ZBTB16	NM_001354750.2	ENST00000684295.1	55.2	TRUE
CHS.10020.13	ZBTB16	NM_001354751.2	ENST00000683318.1	55.2	FALSE
CHS.10020.14	ZBTB16	NM_001018011.3	ENST00000392996.2	55.2	TRUE
CHS.10020.30	ZBTB16	NM_001354752.1	-	56.4	TRUE
CHS.10020.32	ZBTB16	-	ENST00000682218.1	72.8	TRUE
CHS.10020.9	ZBTB16	NM_006006.6	ENST00000335953.9	55.2	TRUE
CHS.10020.alt100	ZBTB16		-	55.2	TRUE
CHS.10020.alt101	ZBTB16	XM_005271658.5	-	56.6	TRUE
CHS.10020.alt102	ZBTB16	NM_006006.6	ENST00000335953.9	55.2	TRUE
CHS.10020.alt103	ZBTB16		ENST00000684612.1	54.8	FALSE
CHS.10020.alt104	ZBTB16		ENST00000682810.1	56.4	TRUE
CHS.10020.alt105	ZBTB16		ENST00000541602.5	55.6	TRUE
CHS.10020.alt106	ZBTB16		ENST00000682971.1	55.2	FALSE
CHS.10020.alt107	ZBTB16	XM_017018259.1	ENST00000682697.1	55.2	TRUE
CHS.10020.alt108	ZBTB16		ENST00000683554.1	55.2	TRUE
CHS.10020.alt109	ZBTB16		-	55.9	TRUE
CHS.10020.alt110	ZBTB16		ENST00000683006.1	81	FALSE
CHS.10020.alt111	ZBTB16		-	72.8	FALSE
CHS.10020.alt112	ZBTB16		ENST00000682218.1	72.8	TRUE
CHS.10020.alt113	ZBTB16		ENST00000535379.1	82.6	TRUE
CHS.10026.2	C11orf71	NM_019021.4	ENST00000325636.8	56.9	FALSE
CHS.10026.4	C11orf71	NM_001271562.2	ENST00000623205.2	67	TRUE
CHS.10026.alt100	C11orf71	NM_001271562.2	ENST00000623205.2	67	no_introns
CHS.10027.1	REXO2	NM_015523.4	ENST00000265881.10	85.1	TRUE
CHS.10027.10	REXO2	-	ENST00000538198.5	76.8	TRUE
CHS.10027.17	REXO2	-	-	73.4	TRUE
CHS.10027.19	REXO2	-	ENST00000539754.5	78.9	TRUE
CHS.10027.5	REXO2	-	ENST00000539275.5	73.5	TRUE
CHS.10027.alt100	REXO2		ENST00000544010.5	66.5	TRUE
CHS.10027.alt101	REXO2		ENST00000544196.5	72.5	FALSE
CHS.10027.alt102	REXO2	NM_015523.4	ENST00000265881.10	85.1	TRUE
CHS.10027.alt103	REXO2		ENST00000539333.5	68.3	TRUE
CHS.10027.alt104	REXO2		ENST00000543243.1	71.9	TRUE
CHS.10027.alt105	REXO2		ENST00000541703.5	73.4	TRUE
CHS.10027.alt106	REXO2		ENST00000543131.5	64.7	TRUE
CHS.10027.alt107	REXO2		ENST00000538198.5	76.8	TRUE
CHS.10027.alt108	REXO2		ENST00000539119.5	53.5	TRUE
CHS.10027.alt109	REXO2		ENST00000544827.5	89.7	FALSE
CHS.10027.alt110	REXO2		ENST00000546316.5	82.5	TRUE
CHS.10027.alt111	REXO2		ENST00000538791.3	82.3	TRUE
CHS.10027.alt112	REXO2		ENST00000538403.5	82.5	TRUE
CHS.10027.alt113	REXO2		ENST00000540492.1	93	TRUE
CHS.10028.2	RBM7	NM_001286045.2	ENST00000375490.10	62.2	FALSE
CHS.10028.3	RBM7	NM_016090.4	ENST00000540163.5	62.1	TRUE
CHS.10028.4	RBM7	NM_001286046.2	ENST00000542140.5	54.5	FALSE
CHS.10028.5	RBM7	NM_001286047.2	ENST00000544313.5	54.5	FALSE
CHS.10028.6	RBM7	NM_001286048.2	ENST00000545678.1	54.5	FALSE
CHS.10028.alt100	RBM7		ENST00000541475.5	78.5	FALSE
CHS.10028.alt101	RBM7	NM_001286045.2	ENST00000375490.10	62.2	FALSE
CHS.10029.11	NXPE2	XM_017017206.2	-	90.1	FALSE
CHS.10029.12	NXPE2	-	-	88.9	FALSE
CHS.10029.6	NXPE2	XM_011542604.3	-	88.9	FALSE
CHS.10029.7	NXPE2	NM_182495.6	ENST00000389586.6	89.1	TRUE
CHS.10029.8	NXPE2	XR_001747769.2	-	85	FALSE
CHS.10029.alt100	NXPE2		-	88.9	FALSE
CHS.10029.alt101	NXPE2	NM_182495.6	ENST00000389586.6	89.1	TRUE
CHS.1003.1	OPRD1	NM_000911.4	ENST00000234961.7	78.5	TRUE
CHS.1003.alt100	OPRD1	NM_000911.4	ENST00000234961.7	78.5	TRUE
CHS.10030.20	NXPE1	NM_152315.5	ENST00000251921.6	94.5	FALSE
CHS.10030.21	NXPE1	-	ENST00000536312.5	84.6	FALSE
CHS.10030.24	NXPE1	-	-	85.6	FALSE
CHS.10030.25	NXPE1	-	-	91.9	FALSE
CHS.10030.6	NXPE1	NM_001367953.1	ENST00000696071.1	90.8	FALSE
CHS.10030.8	NXPE1	NM_001395504.1	ENST00000534921.3	90.8	FALSE
CHS.10030.alt100	NXPE1	NM_001367953.1	-	90.8	FALSE
CHS.10030.alt101	NXPE1		-	94.5	FALSE
CHS.10030.alt102	NXPE1		-	92.1	FALSE
CHS.10030.alt103	NXPE1		-	92.1	FALSE
CHS.10030.alt104	NXPE1	XM_011542599.3	-	90.8	FALSE
CHS.10030.alt105	NXPE1	XM_011542597.3	-	90.8	FALSE
CHS.10030.alt106	NXPE1	XM_011542596.3	-	90.8	FALSE
CHS.10030.alt107	NXPE1	XM_011542598.3	-	90.8	FALSE
CHS.10030.alt108	NXPE1	XR_947793.2	-	84.6	FALSE
CHS.10030.alt109	NXPE1		ENST00000424269.5	94.5	TRUE
CHS.10032.10	NXPE4	-	-	83.8	FALSE
CHS.10032.11	NXPE4	XM_047427149.1	-	89.8	FALSE
CHS.10032.12	NXPE4	XM_011542882.3	-	85.5	FALSE
CHS.10032.13	NXPE4	-	-	85.2	FALSE
CHS.10032.8	NXPE4	NM_017678.3	ENST00000424261.6	92.6	FALSE
CHS.10032.9	NXPE4	NM_001077639.2	ENST00000375478.4	89.8	FALSE
CHS.10032.alt100	NXPE4	NM_001077639.2	ENST00000375478.4	89.8	FALSE
CHS.10032.alt101	NXPE4		-	93.9	FALSE
CHS.10032.alt102	NXPE4		-	85.6	FALSE
CHS.10032.alt103	NXPE4	XM_011542881.2	-	89.8	FALSE
CHS.10032.alt104	NXPE4		-	93.9	FALSE
CHS.10032.alt105	NXPE4		-	89.8	FALSE
CHS.10032.alt106	NXPE4		-	89.8	FALSE
CHS.10032.alt107	NXPE4	XM_006718865.3	-	84.7	FALSE
CHS.10032.alt108	NXPE4	XM_011542883.2	-	82.7	FALSE
CHS.10036.10	CADM1	NM_001301045.2	ENST00000536727.5	79.4	TRUE
CHS.10036.11	CADM1	NM_014333.4	ENST00000452722.7	80	TRUE
CHS.10036.12	CADM1	NM_001301044.2	ENST00000537058.5	79.1	TRUE
CHS.10036.13	CADM1	NM_001301043.2	ENST00000331581.11	77.6	TRUE
CHS.10036.2	CADM1	-	ENST00000537140.5	85	TRUE
CHS.10036.25	CADM1	-	ENST00000541434.5	86.4	TRUE
CHS.10036.4	CADM1	XM_017017457.3	-	80.2	FALSE
CHS.10036.8	CADM1	XM_005271494.4	-	81	TRUE
CHS.10036.9	CADM1	NM_001098517.2	ENST00000542447.6	82.1	TRUE
CHS.10036.alt100	CADM1	NM_001301043.2	ENST00000331581.11	77.6	TRUE
CHS.10036.alt101	CADM1		ENST00000546000.1	60.7	TRUE
CHS.10036.alt102	CADM1		ENST00000543375.5	60.7	TRUE
CHS.10036.alt103	CADM1		ENST00000540852.1	60.7	TRUE
CHS.10036.alt104	CADM1		ENST00000616271.4	80.7	TRUE
CHS.10036.alt105	CADM1		ENST00000540373.1	79.6	TRUE
CHS.10036.alt106	CADM1		ENST00000536781.1	71.6	TRUE
CHS.1005.10	EPB41	-	-	60.9	TRUE
CHS.1005.100	EPB41	-	ENST00000646189.1	70.6	TRUE
CHS.1005.14	EPB41	-	-	62.4	TRUE
CHS.1005.17	EPB41	NM_001376024.1	-	67.6	TRUE
CHS.1005.18	EPB41	NM_001376023.1	-	66.9	TRUE
CHS.1005.19	EPB41	NM_001376025.1	-	68	TRUE
CHS.1005.2	EPB41	NM_203342.3	ENST00000643155.1	67.5	FALSE
CHS.1005.20	EPB41	NM_001376027.1	-	71.7	TRUE
CHS.1005.22	EPB41	NM_001376026.1	ENST00000644342.1	70	TRUE
CHS.1005.23	EPB41	NM_001376028.1	-	71.9	TRUE
CHS.1005.3	EPB41	NM_001166005.2	-	59.2	TRUE
CHS.1005.36	EPB41	NM_001376017.1	ENST00000644600.1	59.4	TRUE
CHS.1005.37	EPB41	NM_001376016.1	-	58.2	TRUE
CHS.1005.38	EPB41	NM_001376019.1	ENST00000643604.1	59.5	TRUE
CHS.1005.39	EPB41	NM_001376021.1	-	61.9	TRUE
CHS.1005.4	EPB41	NM_203343.3	ENST00000347529.7	56.6	TRUE
CHS.1005.40	EPB41	NM_001376018.1	-	59.5	TRUE
CHS.1005.41	EPB41	NM_001376020.1	-	60	TRUE
CHS.1005.49	EPB41	NM_001376013.1	ENST00000343067.9	59.2	TRUE
CHS.1005.5	EPB41	NM_004437.4	ENST00000373800.7	68.4	FALSE
CHS.1005.54	EPB41	NM_001376014.1	ENST00000349460.9	60.3	TRUE
CHS.1005.56	EPB41	NM_001376015.1	-	60.3	TRUE
CHS.1005.6	EPB41	NM_001166007.2	ENST00000647103.1	69.1	TRUE
CHS.1005.69	EPB41	NM_001166006.2	ENST00000373797.2	61.2	TRUE
CHS.1005.7	EPB41	-	-	68.4	TRUE
CHS.1005.84	EPB41	-	-	68.8	TRUE
CHS.1005.9	EPB41	-	-	66	TRUE
CHS.1005.97	EPB41	NM_001376022.1	ENST00000642937.2	66.4	TRUE
CHS.1005.alt100	EPB41		-	67	TRUE
CHS.1005.alt101	EPB41		-	69.3	TRUE
CHS.1005.alt102	EPB41		-	63.7	TRUE
CHS.1005.alt103	EPB41		-	61	TRUE
CHS.1005.alt104	EPB41		-	68.5	TRUE
CHS.1005.alt105	EPB41		-	63	TRUE
CHS.1005.alt106	EPB41		-	65.9	TRUE
CHS.1005.alt107	EPB41		-	61.5	TRUE
CHS.1005.alt108	EPB41		-	69.9	TRUE
CHS.1005.alt109	EPB41		-	68.6	TRUE
CHS.1005.alt110	EPB41		-	68.6	FALSE
CHS.1005.alt111	EPB41		-	67.4	TRUE
CHS.1005.alt112	EPB41		-	68.6	TRUE
CHS.1005.alt113	EPB41	XM_011540964.1	-	59.4	TRUE
CHS.1005.alt114	EPB41	XM_017000595.1	-	61.3	TRUE
CHS.1005.alt115	EPB41	XM_017000594.1	-	61.4	TRUE
CHS.1005.alt116	EPB41	XM_017000596.1	-	61.4	TRUE
CHS.1005.alt117	EPB41	XM_017000593.1	-	59.5	TRUE
CHS.1005.alt118	EPB41	XM_017000597.1	-	62.5	TRUE
CHS.1005.alt119	EPB41		-	68.8	TRUE
CHS.1005.alt120	EPB41		-	61.8	TRUE
CHS.1005.alt121	EPB41		-	60.7	TRUE
CHS.1005.alt122	EPB41		-	67.1	TRUE
CHS.1005.alt123	EPB41		-	67.9	TRUE
CHS.1005.alt124	EPB41		-	66.8	TRUE
CHS.1005.alt125	EPB41		-	59.5	TRUE
CHS.1005.alt126	EPB41		ENST00000373798.5	59.2	TRUE
CHS.1005.alt127	EPB41		ENST00000643173.1	60.4	TRUE
CHS.1005.alt128	EPB41	NM_001376013.1	ENST00000343067.9	59.2	TRUE
CHS.1005.alt129	EPB41		-	59.8	TRUE
CHS.1005.alt130	EPB41		-	59.3	TRUE
CHS.1005.alt131	EPB41		-	55.9	TRUE
CHS.1005.alt132	EPB41		-	58.9	TRUE
CHS.1005.alt133	EPB41		-	53.7	TRUE
CHS.1005.alt134	EPB41		-	57.7	TRUE
CHS.1005.alt135	EPB41		-	58.2	TRUE
CHS.1005.alt136	EPB41		-	55.4	TRUE
CHS.1005.alt137	EPB41	XM_017000592.1	-	62	TRUE
CHS.1005.alt138	EPB41	XM_005245760.1	-	58.5	TRUE
CHS.1005.alt139	EPB41	XM_006710439.1	-	57.9	TRUE
CHS.1005.alt140	EPB41	XM_005245768.1	-	61	TRUE
CHS.1005.alt141	EPB41	XM_005245763.1	-	59.7	TRUE
CHS.1005.alt142	EPB41	XM_011540961.1	-	55.2	TRUE
CHS.1005.alt143	EPB41	XM_005245757.1	-	56	TRUE
CHS.1005.alt144	EPB41	XM_011540960.1	-	55	TRUE
CHS.1005.alt145	EPB41	XM_005245764.1	-	59.2	TRUE
CHS.1005.alt146	EPB41	XM_011540962.1	-	55.3	TRUE
CHS.1005.alt147	EPB41	XM_005245769.1	-	59.9	TRUE
CHS.1005.alt148	EPB41	XM_005245774.1	-	63.3	TRUE
CHS.1005.alt149	EPB41	XM_017000583.1	-	56	TRUE
CHS.1005.alt150	EPB41	XM_005245770.1	-	61.4	TRUE
CHS.1005.alt151	EPB41	XM_017000581.1	-	50.9	TRUE
CHS.1005.alt152	EPB41	XM_017000589.1	-	56.6	TRUE
CHS.1005.alt153	EPB41	XM_017000590.1	-	56.7	TRUE
CHS.1005.alt154	EPB41		-	60.7	TRUE
CHS.1005.alt155	EPB41		-	59.7	TRUE
CHS.1005.alt156	EPB41		-	55.4	TRUE
CHS.1005.alt157	EPB41		-	56	TRUE
CHS.1005.alt158	EPB41		ENST00000645184.1	63.7	TRUE
CHS.1005.alt159	EPB41		ENST00000644848.1	62.2	TRUE
CHS.1005.alt160	EPB41		ENST00000490308.2	58.1	TRUE
CHS.10064.3	BUD13	NM_001159736.2	ENST00000375445.7	62.2	FALSE
CHS.10064.4	BUD13	NM_032725.4	ENST00000260210.5	56	TRUE
CHS.10064.alt100	BUD13	XM_011543035.2	-	56.3	FALSE
CHS.10064.alt101	BUD13		-	46.9	TRUE
CHS.10064.alt102	BUD13		-	47.4	TRUE
CHS.10064.alt103	BUD13		-	46.9	FALSE
CHS.10064.alt104	BUD13	NM_032725.4	ENST00000260210.5	56	TRUE
CHS.10064.alt105	BUD13		-	47.4	FALSE
CHS.10066.1	ZPR1	NM_001317086.2	-	80.5	TRUE
CHS.10066.2	ZPR1	NM_003904.5	ENST00000227322.8	79.2	TRUE
CHS.10066.6	ZPR1	-	-	79.9	FALSE
CHS.10066.alt100	ZPR1		-	82	FALSE
CHS.10066.alt101	ZPR1	NM_003904.5	ENST00000227322.8	79.2	TRUE
CHS.10066.alt102	ZPR1	XR_001748023.2	-	79.9	FALSE
CHS.10068.2	APOA5	NM_001371904.1	ENST00000227665.9	69.7	TRUE
CHS.10068.3	APOA5	NM_001166598.2	ENST00000433069.2	69.7	TRUE
CHS.10068.4	APOA5	NM_052968.5	ENST00000542499.5	69.7	FALSE
CHS.10068.alt100	APOA5	NM_001371904.1	ENST00000227665.9	69.7	TRUE
CHS.1007.1	TMEM200B	NM_001171868.2	ENST00000420504.2	48.8	TRUE
CHS.1007.2	TMEM200B	NM_001003682.4	ENST00000521452.2	48.8	FALSE
CHS.1007.alt100	TMEM200B	NM_001003682.4	ENST00000521452.2	48.8	FALSE
CHS.1007.alt101	TMEM200B	XM_011541457.2	-	48.3	FALSE
CHS.10070.2	APOA4	NM_000482.4	ENST00000357780.5	75.3	TRUE
CHS.10070.3	APOA4	-	-	77.6	FALSE
CHS.10070.alt100	APOA4	NM_000482.4	ENST00000357780.5	75.3	TRUE
CHS.10072.3	APOC3	NM_000040.3	ENST00000227667.8	60.4	TRUE
CHS.10072.alt100	APOC3		-	60.4	FALSE
CHS.10072.alt101	APOC3		-	60.4	FALSE
CHS.10072.alt102	APOC3		-	60.4	TRUE
CHS.10072.alt103	APOC3		-	60.4	FALSE
CHS.10072.alt104	APOC3		-	60.4	FALSE
CHS.10072.alt105	APOC3	NM_000040.3	ENST00000227667.8	60.4	TRUE
CHS.10072.alt106	APOC3		ENST00000375345.3	62.4	TRUE
CHS.10072.alt107	APOC3		ENST00000630701.1	62.4	TRUE
CHS.10073.1	APOA1	NM_001318017.2	ENST00000375320.5	64.5	FALSE
CHS.10073.16	APOA1	-	-	64.5	FALSE
CHS.10073.2	APOA1	NM_001318018.2	ENST00000359492.6	64.5	TRUE
CHS.10073.5	APOA1	NM_001318021.1	-	68.7	TRUE
CHS.10073.6	APOA1	NM_000039.3	ENST00000236850.5	64.5	TRUE
CHS.10073.alt100	APOA1		ENST00000375329.6	63.2	TRUE
CHS.10073.alt101	APOA1	NM_000039.3	ENST00000236850.5	64.5	TRUE
CHS.10073.alt102	APOA1		-	64.5	FALSE
CHS.10073.alt103	APOA1		-	64.5	FALSE
CHS.10075.39	SIK3	-	-	41.3	FALSE
CHS.10075.4	SIK3	NM_025164.6	ENST00000375300.6	51.3	FALSE
CHS.10075.alt100	SIK3		-	41.3	FALSE
CHS.10075.alt101	SIK3		-	41.2	FALSE
CHS.10075.alt102	SIK3		-	41.2	FALSE
CHS.10075.alt103	SIK3		-	41.9	FALSE
CHS.10075.alt104	SIK3		-	41.9	FALSE
CHS.10075.alt105	SIK3		-	42.9	FALSE
CHS.10075.alt106	SIK3		-	41.3	FALSE
CHS.10075.alt107	SIK3	XM_005271485.3	-	41.3	FALSE
CHS.10075.alt108	SIK3	XM_017017427.1	-	41.2	FALSE
CHS.10075.alt109	SIK3		ENST00000465421.5	43.2	FALSE
CHS.10075.alt110	SIK3		ENST00000480468.1	45	TRUE
CHS.10075.alt111	SIK3	XM_011542726.1	-	66.2	TRUE
CHS.10075.alt112	SIK3		ENST00000480222.1	58.3	TRUE
CHS.10075.alt113	SIK3		ENST00000413553.1	65.1	TRUE
CHS.10075.alt114	SIK3	NM_001366687.1	ENST00000485363.1	75	FALSE
CHS.10079.11	PAFAH1B2	-	ENST00000533206.1	82.9	TRUE
CHS.10079.2	PAFAH1B2	NM_002572.4	ENST00000527958.6	93.7	TRUE
CHS.10079.25	PAFAH1B2	-	-	94.2	FALSE
CHS.10079.3	PAFAH1B2	NM_001309431.2	-	92.2	TRUE
CHS.10079.5	PAFAH1B2	NM_001184746.2	ENST00000530272.1	72	FALSE
CHS.10079.6	PAFAH1B2	NM_001184747.2	ENST00000529887.6	87	FALSE
CHS.10079.7	PAFAH1B2	NM_001184748.2	ENST00000419197.6	94.7	FALSE
CHS.10079.8	PAFAH1B2	NR_110269.2	-	72	FALSE
CHS.10079.9	PAFAH1B2	NR_110268.2	-	87	FALSE
CHS.10079.alt100	PAFAH1B2		-	94.2	FALSE
CHS.10079.alt101	PAFAH1B2	NM_002572.4	ENST00000527958.6	93.7	TRUE
CHS.10079.alt102	PAFAH1B2	NR_110282.2	ENST00000304808.10	83.7	TRUE
CHS.10079.alt103	PAFAH1B2		-	87.4	FALSE
CHS.10079.alt104	PAFAH1B2	NR_110268.2	-	87	FALSE
CHS.10079.alt105	PAFAH1B2	XM_017017840.1	-	90.8	FALSE
CHS.10080.1	SIDT2	NM_001040455.2	ENST00000324225.9	79.9	TRUE
CHS.10080.23	SIDT2	-	ENST00000628876.2	76.4	TRUE
CHS.10080.24	SIDT2	-	ENST00000431081.6	80	FALSE
CHS.10080.6	SIDT2	-	-	79.4	TRUE
CHS.10080.alt100	SIDT2	NM_001040455.2	ENST00000324225.9	79.9	TRUE
CHS.10080.alt101	SIDT2		-	86.3	TRUE
CHS.10080.alt102	SIDT2		-	79.4	TRUE
CHS.10080.alt103	SIDT2		ENST00000531255.1	75.5	TRUE
CHS.10080.alt104	SIDT2		-	86.3	TRUE
CHS.10080.alt105	SIDT2		ENST00000525065.1	60.2	TRUE
CHS.10080.alt106	SIDT2		ENST00000532062.1	86.3	TRUE
CHS.10081.1	TAGLN	NM_001001522.2	ENST00000278968.10	85.9	TRUE
CHS.10081.2	TAGLN	NM_003186.5	ENST00000392951.9	85.9	TRUE
CHS.10081.alt100	TAGLN	NM_003186.5	ENST00000392951.9	85.9	TRUE
CHS.10081.alt101	TAGLN		ENST00000525531.5	85.9	TRUE
CHS.10083.3	PCSK7	-	-	82.5	TRUE
CHS.10083.4	PCSK7	-	-	82.8	TRUE
CHS.10083.5	PCSK7	-	-	88.5	TRUE
CHS.10083.6	PCSK7	NM_004716.4	ENST00000320934.8	80.8	TRUE
CHS.10083.7	PCSK7	-	-	88.5	TRUE
CHS.10083.alt100	PCSK7	NM_004716.4	ENST00000320934.8	80.8	TRUE
CHS.10083.alt101	PCSK7		-	79.3	FALSE
CHS.10083.alt102	PCSK7	XM_006718940.4	-	77.4	FALSE
CHS.10083.alt103	PCSK7		ENST00000529458.5	55.3	TRUE
CHS.10083.alt104	PCSK7		ENST00000527037.5	77.7	TRUE
CHS.10083.alt105	PCSK7	XR_947871.3	-	86.5	FALSE
CHS.10083.alt106	PCSK7		ENST00000528217.1	63.4	FALSE
CHS.10085.16	RNF214	-	-	69.7	TRUE
CHS.10085.20	RNF214	-	ENST00000530849.1	71.8	TRUE
CHS.10085.3	RNF214	NM_207343.4	ENST00000300650.9	60	TRUE
CHS.10085.7	RNF214	NM_001077239.2	ENST00000531452.5	60	TRUE
CHS.10085.8	RNF214	NM_001278249.2	ENST00000531287.5	69.7	TRUE
CHS.10085.alt100	RNF214		ENST00000534428.5	47.7	TRUE
CHS.10085.alt101	RNF214	NM_207343.4	ENST00000300650.9	60	TRUE
CHS.10085.alt102	RNF214		-	69.7	TRUE
CHS.10085.alt103	RNF214	XR_001747824.2	-	63.3	TRUE
CHS.10086.19	BACE1	XM_047426686.1	ENST00000680271.1	88.8	TRUE
CHS.10086.3	BACE1	NM_001207049.3	ENST00000510630.5	82.3	FALSE
CHS.10086.4	BACE1	NM_001207048.3	ENST00000392937.10	86.3	FALSE
CHS.10086.5	BACE1	NM_138973.4	ENST00000428381.6	78.9	TRUE
CHS.10086.6	BACE1	NM_138971.4	ENST00000445823.6	80.7	TRUE
CHS.10086.7	BACE1	NM_138972.4	ENST00000513780.5	78.2	TRUE
CHS.10086.8	BACE1	NM_012104.6	ENST00000313005.11	83.8	TRUE
CHS.10086.alt100	BACE1		-	77.9	FALSE
CHS.10086.alt101	BACE1		ENST00000680971.1	88.8	TRUE
CHS.10086.alt102	BACE1		ENST00000680800.1	88.8	FALSE
CHS.10086.alt103	BACE1	NM_012104.6	ENST00000313005.11	83.8	TRUE
CHS.10086.alt104	BACE1		-	70.1	TRUE
CHS.10086.alt105	BACE1		ENST00000681714.1	77.9	FALSE
CHS.10086.alt106	BACE1		ENST00000514464.2	88.8	TRUE
CHS.10086.alt107	BACE1		ENST00000509916.5	84	TRUE
CHS.10086.alt108	BACE1		ENST00000530824.1	92.5	TRUE
CHS.10087.18	CEP164	NM_014956.5	ENST00000278935.8	61.9	FALSE
CHS.10087.96	CEP164	-	ENST00000533706.5	72.1	FALSE
CHS.10087.97	CEP164	-	-	72.3	FALSE
CHS.10087.alt100	CEP164		ENST00000533570.1	83.1	FALSE
CHS.10087.alt101	CEP164		ENST00000528706.5	60.7	TRUE
CHS.10087.alt102	CEP164		ENST00000532187.1	66	TRUE
CHS.10089.20	DSCAML1	NM_001367904.1	-	88.7	FALSE
CHS.10089.9	DSCAML1	NM_020693.4	ENST00000651296.2	69.2	TRUE
CHS.10089.alt100	DSCAML1		-	81	FALSE
CHS.10089.alt101	DSCAML1	NM_001367905.1	-	93	FALSE
CHS.10089.alt102	DSCAML1		ENST00000532119.5	73.6	TRUE
CHS.10089.alt103	DSCAML1		ENST00000524656.5	68	TRUE
CHS.10089.alt104	DSCAML1		ENST00000584394.5	65.2	TRUE
CHS.10089.alt105	DSCAML1		ENST00000583233.5	72.5	FALSE
CHS.10089.alt106	DSCAML1		ENST00000583660.5	72.5	TRUE
CHS.10089.alt107	DSCAML1		ENST00000524841.5	68.2	FALSE
CHS.10089.alt108	DSCAML1		ENST00000527429.5	68.2	TRUE
CHS.10089.alt109	DSCAML1		ENST00000540359.6	68	TRUE
CHS.10093.14	FXYD2	-	ENST00000534383.5	46	FALSE
CHS.10093.2	FXYD2	NM_001680.5	ENST00000292079.7	72.3	TRUE
CHS.10093.4	FXYD2	NM_021603.4	ENST00000260287.2	73.6	TRUE
CHS.10093.alt100	FXYD2	NM_001680.5	ENST00000292079.7	72.3	TRUE
CHS.10093.alt101	FXYD2		ENST00000533281.1	72.3	TRUE
CHS.10094.1	FXYD6	NM_022003.4	ENST00000526014.6	68	TRUE
CHS.10094.12	FXYD6	-	-	64.8	TRUE
CHS.10094.2	FXYD6	NM_001164832.3	ENST00000530956.6	68	FALSE
CHS.10094.3	FXYD6	NM_001164837.3	ENST00000539526.5	68	FALSE
CHS.10094.4	FXYD6	NM_001164836.3	ENST00000260282.8	68	FALSE
CHS.10094.6	FXYD6	NM_001164831.3	ENST00000527717.5	68	TRUE
CHS.10094.alt100	FXYD6	NM_022003.4	ENST00000526014.6	68	TRUE
CHS.10095.2	FXYD6-FXYD2	NM_001243598.4	ENST00000532984.1	63.4	TRUE
CHS.10095.3	FXYD6-FXYD2	NM_001204268.3	ENST00000614497.5	59	TRUE
CHS.10095.alt100	FXYD6-FXYD2		ENST00000528014.5	73.6	FALSE
CHS.10099.1	TMPRSS13	NM_001206789.2	ENST00000528626.5	73.8	TRUE
CHS.10099.13	TMPRSS13	-	-	81.1	TRUE
CHS.10099.16	TMPRSS13	-	ENST00000445164.6	73.2	TRUE
CHS.10099.2	TMPRSS13	NM_001077263.3	ENST00000524993.6	74.6	TRUE
CHS.10099.6	TMPRSS13	NM_001244995.2	ENST00000430170.6	74.6	TRUE
CHS.10099.8	TMPRSS13	NM_001206790.2	ENST00000526090.1	59.8	TRUE
CHS.10099.alt100	TMPRSS13		-	91.3	TRUE
CHS.10099.alt101	TMPRSS13	NM_001077263.3	ENST00000524993.6	74.6	TRUE
CHS.10099.alt102	TMPRSS13		-	91.3	TRUE
CHS.10099.alt103	TMPRSS13		-	92.9	FALSE
CHS.10099.alt104	TMPRSS13		-	91.3	TRUE
CHS.10099.alt105	TMPRSS13		-	64.6	TRUE
CHS.101.10	ATAD3C	-	-	82.8	FALSE
CHS.101.2	ATAD3C	NM_001039211.3	ENST00000378785.7	82.8	FALSE
CHS.101.9	ATAD3C	-	-	83	FALSE
CHS.101.alt100	ATAD3C		-	82.8	FALSE
CHS.101.alt101	ATAD3C		-	84.4	FALSE
CHS.101.alt102	ATAD3C		-	83	FALSE
CHS.101.alt103	ATAD3C		-	81.3	FALSE
CHS.101.alt104	ATAD3C	NM_001039211.3	ENST00000378785.7	82.8	FALSE
CHS.101.alt105	ATAD3C		-	82.8	FALSE
CHS.101.alt106	ATAD3C		-	80.2	FALSE
CHS.101.alt107	ATAD3C		-	75.6	TRUE
CHS.101.alt108	ATAD3C		-	83.4	FALSE
CHS.101.alt109	ATAD3C		-	80.2	FALSE
CHS.101.alt110	ATAD3C		-	75.6	FALSE
CHS.101.alt111	ATAD3C		-	85	FALSE
CHS.101.alt112	ATAD3C		-	85	TRUE
CHS.101.alt113	ATAD3C		-	80.2	TRUE
CHS.101.alt114	ATAD3C		-	85.3	TRUE
CHS.101.alt115	ATAD3C		ENST00000484537.2	78.1	TRUE
CHS.1010.17	SRSF4	-	-	48.9	FALSE
CHS.1010.2	SRSF4	NM_005626.5	ENST00000373795.7	53	TRUE
CHS.1010.6	SRSF4	XM_011541951.4	ENST00000466448.4	55.3	TRUE
CHS.1010.alt100	SRSF4	NM_005626.5	ENST00000373795.7	53	TRUE
CHS.10103.1	IL10RA	XM_047426882.1	ENST00000530761.5	57.7	FALSE
CHS.10103.2	IL10RA	NR_026691.2	ENST00000533700.5	57.7	FALSE
CHS.10103.3	IL10RA	NM_001558.4	ENST00000227752.8	58.1	TRUE
CHS.10103.alt100	IL10RA		ENST00000530761.5	57.7	FALSE
CHS.10103.alt101	IL10RA	NR_026691.2	ENST00000533700.5	57.7	FALSE
CHS.10103.alt102	IL10RA		-	48.6	FALSE
CHS.10103.alt103	IL10RA		ENST00000534574.5	48.6	FALSE
CHS.10103.alt104	IL10RA	NM_001558.4	ENST00000227752.8	58.1	TRUE
CHS.10103.alt105	IL10RA	XM_024448493.1	ENST00000526544.5	48.6	TRUE
CHS.10103.alt106	IL10RA		ENST00000529924.6	48.6	TRUE
CHS.10103.alt107	IL10RA		ENST00000530178.1	67.2	TRUE
CHS.10105.2	SMIM35	NM_001394165.1	ENST00000689828.1	65.9	TRUE
CHS.10105.3	SMIM35	NM_001394166.1	-	75.8	TRUE
CHS.10105.4	SMIM35	NM_001394164.1	-	62.2	FALSE
CHS.10105.6	SMIM35	NM_001354434.2	-	57.7	FALSE
CHS.10105.alt100	SMIM35	NM_001394165.1	-	65.9	TRUE
CHS.10108.1	TMPRSS4	NM_019894.4	ENST00000437212.8	87.8	FALSE
CHS.10108.11	TMPRSS4	XM_005271615.4	-	81.2	FALSE
CHS.10108.12	TMPRSS4	XM_011542903.4	-	73.2	FALSE
CHS.10108.13	TMPRSS4	XM_005271613.5	-	81.3	FALSE
CHS.10108.17	TMPRSS4	XM_005271614.4	-	81.7	FALSE
CHS.10108.2	TMPRSS4	NM_001083947.2	ENST00000522824.5	85.6	FALSE
CHS.10108.25	TMPRSS4	-	ENST00000616579.4	88.5	FALSE
CHS.10108.3	TMPRSS4	NM_001290094.2	ENST00000517483.5	90.3	FALSE
CHS.10108.4	TMPRSS4	NM_001173551.2	ENST00000534111.5	88.5	TRUE
CHS.10108.5	TMPRSS4	NR_110734.2	ENST00000519236.5	84.3	TRUE
CHS.10108.6	TMPRSS4	NM_001290096.2	ENST00000522307.5	84.2	TRUE
CHS.10108.7	TMPRSS4	NM_001173552.2	ENST00000523251.5	88.7	TRUE
CHS.10108.9	TMPRSS4	XM_011542901.3	-	79.6	FALSE
CHS.10108.alt100	TMPRSS4		-	88.5	FALSE
CHS.10108.alt101	TMPRSS4	NR_110734.2	ENST00000519236.5	84.3	TRUE
CHS.10108.alt102	TMPRSS4	NM_019894.4	ENST00000437212.8	87.8	FALSE
CHS.10108.alt103	TMPRSS4		ENST00000520063.1	91.6	TRUE
CHS.10108.alt104	TMPRSS4		ENST00000517544.1	52.8	TRUE
CHS.10108.alt105	TMPRSS4		-	84.2	FALSE
CHS.10108.alt106	TMPRSS4		-	93.1	FALSE
CHS.10108.alt107	TMPRSS4		-	83.4	TRUE
CHS.10108.alt108	TMPRSS4		-	86.2	TRUE
CHS.10108.alt109	TMPRSS4		-	92.2	TRUE
CHS.10108.alt110	TMPRSS4		ENST00000518413.2	74.3	TRUE
CHS.10108.alt111	TMPRSS4		ENST00000518610.1	77.3	TRUE
CHS.10108.alt112	TMPRSS4		ENST00000523770.1	54	TRUE
CHS.10110.3	SCN4B	-	-	77.9	FALSE
CHS.10110.5	SCN4B	NM_001142349.2	ENST00000415030.6	82	TRUE
CHS.10110.6	SCN4B	NM_001142348.2	ENST00000529878.1	66.9	TRUE
CHS.10110.7	SCN4B	NM_174934.4	ENST00000324727.9	81.5	TRUE
CHS.10110.alt100	SCN4B		-	77.9	FALSE
CHS.10110.alt101	SCN4B	NM_174934.4	ENST00000324727.9	81.5	TRUE
CHS.10110.alt102	SCN4B		ENST00000423160.2	71.5	TRUE
CHS.10111.10	SCN2B	-	ENST00000669850.1	85.2	TRUE
CHS.10111.2	SCN2B	NM_004588.5	ENST00000278947.6	84.2	TRUE
CHS.10111.alt100	SCN2B		-	87	FALSE
CHS.10111.alt101	SCN2B	NM_004588.5	ENST00000278947.6	84.2	TRUE
CHS.10111.alt102	SCN2B		ENST00000658882.1	50.8	FALSE
CHS.10112.1	JAML	NM_001286571.2	-	70.1	FALSE
CHS.10112.2	JAML	NR_104479.2	ENST00000526595.5	77.2	FALSE
CHS.10112.3	JAML	NM_153206.3	ENST00000292067.11	71.6	FALSE
CHS.10112.4	JAML	NM_001286570.2	ENST00000526620.5	70.1	FALSE
CHS.10112.5	JAML	NM_001098526.2	ENST00000356289.10	71.3	FALSE
CHS.10112.alt100	JAML	NR_104479.2	ENST00000526595.5	77.2	FALSE
CHS.10112.alt101	JAML	NM_001098526.2	ENST00000356289.10	71.3	FALSE
CHS.10112.alt102	JAML		-	77.2	FALSE
CHS.10112.alt103	JAML	XM_005271407.3	-	72.3	FALSE
CHS.10112.alt104	JAML	XM_024448351.1	-	54.7	FALSE
CHS.10112.alt105	JAML	XM_017017213.1	-	69.8	FALSE
CHS.10112.alt106	JAML	XR_001747770.1	-	77.2	FALSE
CHS.10112.alt107	JAML	XM_017017215.1	-	54.7	FALSE
CHS.10112.alt108	JAML	XM_017017214.1	-	54.7	FALSE
CHS.10112.alt109	JAML		ENST00000529164.5	77.2	TRUE
CHS.10112.alt110	JAML		ENST00000527877.5	77.1	TRUE
CHS.10113.2	MPZL3	-	-	80.7	FALSE
CHS.10113.4	MPZL3	NR_104404.2	ENST00000525386.5	70.3	TRUE
CHS.10113.5	MPZL3	NM_001286152.2	ENST00000527472.1	78.1	FALSE
CHS.10113.6	MPZL3	NR_104405.2	ENST00000446386.2	61.9	TRUE
CHS.10113.7	MPZL3	NM_198275.3	ENST00000278949.9	77.8	TRUE
CHS.10113.alt100	MPZL3		-	78.8	TRUE
CHS.10113.alt101	MPZL3	XM_006718775.2	-	80.6	FALSE
CHS.10113.alt102	MPZL3	NR_104404.2	ENST00000525386.5	70.3	TRUE
CHS.10113.alt103	MPZL3	NR_104405.2	ENST00000446386.2	61.9	TRUE
CHS.10113.alt104	MPZL3	NM_198275.3	ENST00000278949.9	77.8	TRUE
CHS.10113.alt105	MPZL3		-	54.2	TRUE
CHS.10113.alt106	MPZL3		-	63.9	TRUE
CHS.10114.17	MPZL2	NM_144765.3	ENST00000438295.2	88	TRUE
CHS.10114.18	MPZL2	-	ENST00000529376.5	88.5	TRUE
CHS.10114.3	MPZL2	NM_005797.4	ENST00000278937.7	88	FALSE
CHS.10114.alt100	MPZL2	NM_005797.4	ENST00000278937.7	88	FALSE
CHS.10114.alt101	MPZL2		ENST00000534175.6	90	FALSE
CHS.10114.alt102	MPZL2		ENST00000527282.1	59.3	TRUE
CHS.10114.alt103	MPZL2		ENST00000525647.1	84.2	FALSE
CHS.10117.2	CD3E	NM_000733.4	ENST00000361763.9	73.2	FALSE
CHS.10117.alt100	CD3E		-	73.2	FALSE
CHS.10117.alt101	CD3E		-	73.2	FALSE
CHS.10117.alt102	CD3E	NM_000733.4	ENST00000361763.9	73.2	FALSE
CHS.10117.alt103	CD3E		-	66.5	FALSE
CHS.10117.alt104	CD3E		ENST00000526146.5	64.7	TRUE
CHS.10117.alt105	CD3E		ENST00000531913.1	70.3	TRUE
CHS.10118.2	CD3D	NM_001040651.2	ENST00000392884.2	75.1	TRUE
CHS.10118.3	CD3D	NM_000732.6	ENST00000300692.9	73.3	TRUE
CHS.10118.alt100	CD3D		-	69.5	FALSE
CHS.10118.alt101	CD3D		-	69.5	TRUE
CHS.10118.alt102	CD3D		-	69.5	FALSE
CHS.10118.alt103	CD3D		-	73.3	FALSE
CHS.10118.alt104	CD3D		-	73.3	FALSE
CHS.10118.alt105	CD3D		-	69.5	FALSE
CHS.10118.alt106	CD3D	NM_000732.6	ENST00000300692.9	73.3	TRUE
CHS.10118.alt107	CD3D		ENST00000529594.5	68.7	TRUE
CHS.1012.1	MECR	NM_016011.5	ENST00000263702.11	89.9	TRUE
CHS.1012.19	MECR	-	-	95.7	FALSE
CHS.1012.2	MECR	NM_001024732.4	ENST00000373791.7	95.7	TRUE
CHS.1012.20	MECR	NM_001349712.2	-	95.7	FALSE
CHS.1012.23	MECR	NM_001349713.2	-	95.7	FALSE
CHS.1012.24	MECR	NR_146212.2	-	95.6	FALSE
CHS.1012.26	MECR	NM_001349711.2	-	95.7	FALSE
CHS.1012.37	MECR	NM_001349714.2	-	95.7	TRUE
CHS.1012.39	MECR	NM_001349715.2	-	85.6	FALSE
CHS.1012.4	MECR	NM_001349716.2	-	85.3	FALSE
CHS.1012.41	MECR	NR_146215.2	-	95.7	FALSE
CHS.1012.43	MECR	NR_146213.2	-	89.9	FALSE
CHS.1012.44	MECR	NM_001349717.2	-	94.6	TRUE
CHS.1012.59	MECR	NR_146214.2	-	95.1	FALSE
CHS.1012.7	MECR	XM_011541541.2	-	75.5	FALSE
CHS.1012.alt100	MECR		-	75.8	FALSE
CHS.1012.alt101	MECR		-	95.7	FALSE
CHS.1012.alt102	MECR		-	95.7	FALSE
CHS.1012.alt103	MECR		-	95.7	FALSE
CHS.1012.alt104	MECR	NM_016011.5	ENST00000263702.11	89.9	TRUE
CHS.1012.alt105	MECR	NR_146212.2	-	95.6	FALSE
CHS.1012.alt106	MECR	NR_146213.2	-	89.9	FALSE
CHS.1012.alt107	MECR	NR_146215.2	-	95.7	FALSE
CHS.1012.alt108	MECR		-	95.6	FALSE
CHS.1012.alt109	MECR	XM_011541539.1	-	70.9	FALSE
CHS.1012.alt110	MECR	XM_017001416.1	-	85	FALSE
CHS.1012.alt111	MECR	XM_011541550.1	-	75.3	FALSE
CHS.1012.alt112	MECR	XM_024447452.1	-	85	FALSE
CHS.1012.alt113	MECR		ENST00000483435.5	93.1	TRUE
CHS.1012.alt114	MECR	XM_017001413.1	-	95.7	FALSE
CHS.1012.alt115	MECR	XM_024447446.1	-	95.7	FALSE
CHS.1012.alt116	MECR	XM_024447448.1	-	95.7	FALSE
CHS.1012.alt117	MECR	XM_024447442.1	-	95.7	FALSE
CHS.1012.alt118	MECR	XR_946663.2	-	65.1	FALSE
CHS.1012.alt119	MECR	XR_001737209.1	-	70.2	FALSE
CHS.1012.alt120	MECR	XR_001737210.1	-	70.2	FALSE
CHS.1012.alt121	MECR	XM_024447443.1	-	95.7	FALSE
CHS.1012.alt122	MECR	XM_024447450.1	-	95.7	FALSE
CHS.1012.alt123	MECR	XM_024447444.1	-	95.7	FALSE
CHS.1012.alt124	MECR		ENST00000473030.5	94.3	TRUE
CHS.1012.alt125	MECR		ENST00000478505.6	96.2	FALSE
CHS.1012.alt126	MECR		ENST00000490529.5	83	TRUE
CHS.1012.alt127	MECR		ENST00000464511.1	86.7	TRUE
CHS.1012.alt128	MECR		ENST00000463052.5	83.3	FALSE
CHS.1012.alt129	MECR		ENST00000474946.5	76.9	FALSE
CHS.10120.1	CD3G	XM_005271724.5	ENST00000527777.5	70.5	TRUE
CHS.10120.3	CD3G	NM_000073.3	ENST00000532917.3	71.6	FALSE
CHS.10120.alt100	CD3G		ENST00000533462.5	70.1	TRUE
CHS.10120.alt101	CD3G	NM_000073.3	ENST00000532917.3	71.6	FALSE
CHS.10120.alt102	CD3G	XM_006718941.3	-	71.6	TRUE
CHS.10121.2	UBE4A	NM_001204077.2	ENST00000252108.8	87.4	TRUE
CHS.10121.22	UBE4A	-	-	85.6	FALSE
CHS.10121.24	UBE4A	-	-	83.8	FALSE
CHS.10121.25	UBE4A	-	-	88.1	TRUE
CHS.10121.alt100	UBE4A		-	90.1	TRUE
CHS.10121.alt101	UBE4A		-	91.1	FALSE
CHS.10121.alt102	UBE4A		-	91.1	FALSE
CHS.10121.alt103	UBE4A		-	83.8	FALSE
CHS.10121.alt104	UBE4A		-	83.8	FALSE
CHS.10121.alt105	UBE4A		-	88.1	TRUE
CHS.10121.alt106	UBE4A		ENST00000545354.1	90.1	FALSE
CHS.10123.13	ATP5MG	-	ENST00000690793.1	77.7	TRUE
CHS.10123.15	ATP5MG	-	ENST00000689460.1	86.6	TRUE
CHS.10123.18	ATP5MG	-	-	65.5	TRUE
CHS.10123.2	ATP5MG	NM_006476.5	ENST00000300688.8	63	TRUE
CHS.10123.alt100	ATP5MG	NR_033759.2	ENST00000529790.5	68.8	FALSE
CHS.10123.alt101	ATP5MG	NM_006476.5	ENST00000300688.8	63	TRUE
CHS.10128.alt100	KMT2A		ENST00000648261.1	46.2	TRUE
CHS.10128.alt101	KMT2A		ENST00000531904.6	44.8	TRUE
CHS.10128.alt102	KMT2A		ENST00000529852.2	54	TRUE
CHS.10128.alt103	KMT2A		ENST00000533790.2	63	TRUE
CHS.10128.alt104	KMT2A		ENST00000648565.1	83.9	FALSE
CHS.10128.alt105	KMT2A		ENST00000527839.2	83.9	TRUE
CHS.10128.alt106	KMT2A		ENST00000525408.2	86.1	TRUE
CHS.10130.1	TTC36	NM_001080441.4	ENST00000302783.10	85.4	TRUE
CHS.10130.4	TTC36	NM_001346096.2	ENST00000528570.1	86.6	FALSE
CHS.10130.5	TTC36	NM_001346097.2	ENST00000533501.5	86.6	FALSE
CHS.10130.7	TTC36	NM_001346098.2	-	82.6	FALSE
CHS.10130.alt100	TTC36	NM_001080441.4	ENST00000302783.10	85.4	TRUE
CHS.10131.1	TMEM25	NM_032780.4	ENST00000313236.10	63.1	FALSE
CHS.10131.10	TMEM25	XM_017018422.3	-	63.1	FALSE
CHS.10131.2	TMEM25	NM_001318755.2	ENST00000533102.5	61.4	FALSE
CHS.10131.3	TMEM25	NM_001144034.2	ENST00000359862.8	60.6	FALSE
CHS.10131.31	TMEM25	XM_024448724.2	ENST00000524725.5	60.6	FALSE
CHS.10131.4	TMEM25	NM_001318757.2	-	65.6	FALSE
CHS.10131.45	TMEM25	-	ENST00000529001.5	72.2	TRUE
CHS.10131.49	TMEM25	-	ENST00000525298.5	82.2	TRUE
CHS.10131.5	TMEM25	NM_001144036.2	ENST00000354064.11	47.8	FALSE
CHS.10131.6	TMEM25	NM_001144035.2	ENST00000411589.6	60.6	FALSE
CHS.10131.8	TMEM25	NM_001144037.2	ENST00000354284.8	64.6	FALSE
CHS.10131.9	TMEM25	NM_001144038.2	ENST00000442938.6	62.8	FALSE
CHS.10131.alt100	TMEM25	XM_017018433.2	-	53.9	FALSE
CHS.10131.alt101	TMEM25	NM_032780.4	ENST00000313236.10	63.1	FALSE
CHS.10131.alt102	TMEM25	XM_005271703.2	-	60.7	FALSE
CHS.10131.alt103	TMEM25	XM_006718926.3	-	60.7	FALSE
CHS.10131.alt104	TMEM25	XM_011543038.3	-	58.7	FALSE
CHS.10131.alt105	TMEM25	NR_134852.2	ENST00000526973.5	62	FALSE
CHS.10131.alt106	TMEM25	XM_017018430.2	-	61.4	TRUE
CHS.10131.alt107	TMEM25	XM_017018432.2	-	53.9	FALSE
CHS.10131.alt108	TMEM25		ENST00000533137.5	63.1	TRUE
CHS.10131.alt109	TMEM25		ENST00000524522.5	61.5	TRUE
CHS.10131.alt110	TMEM25		ENST00000526853.1	61.5	TRUE
CHS.10132.17	IFT46	-	-	70.3	FALSE
CHS.10132.3	IFT46	NM_001168618.2	ENST00000264021.8	70.3	TRUE
CHS.10132.4	IFT46	NM_020153.4	ENST00000264020.6	64.5	FALSE
CHS.10132.alt100	IFT46		-	64.5	FALSE
CHS.10132.alt101	IFT46		-	70.3	FALSE
CHS.10132.alt102	IFT46		-	70.3	FALSE
CHS.10132.alt103	IFT46	XM_017018018.2	-	70.3	TRUE
CHS.10132.alt104	IFT46	XM_011542906.3	-	70.3	FALSE
CHS.10132.alt105	IFT46	XM_017018017.1	-	64.5	FALSE
CHS.10132.alt106	IFT46	XM_011542905.3	-	64.5	FALSE
CHS.10132.alt107	IFT46	NM_001168618.2	ENST00000264021.8	70.3	TRUE
CHS.10132.alt108	IFT46		ENST00000531201.5	77	TRUE
CHS.10132.alt109	IFT46		ENST00000525060.1	81.8	TRUE
CHS.10132.alt110	IFT46		ENST00000531939.5	69.8	TRUE
CHS.10133.10	PHLDB1	NM_001144758.3	ENST00000600882.6	59	TRUE
CHS.10133.3	PHLDB1	NM_015157.4	ENST00000361417.6	59	TRUE
CHS.10133.59	PHLDB1	XM_011542715.4	ENST00000614369.4	72.3	TRUE
CHS.10133.alt100	PHLDB1		-	53.6	TRUE
CHS.10133.alt101	PHLDB1		-	53.9	FALSE
CHS.10133.alt102	PHLDB1		-	53.9	FALSE
CHS.10133.alt103	PHLDB1		-	53.9	FALSE
CHS.10133.alt104	PHLDB1		-	53.9	FALSE
CHS.10133.alt105	PHLDB1		-	53.9	FALSE
CHS.10133.alt106	PHLDB1		-	53.9	FALSE
CHS.10133.alt107	PHLDB1		-	53.9	FALSE
CHS.10133.alt108	PHLDB1		-	53.9	FALSE
CHS.10133.alt109	PHLDB1		-	53.9	FALSE
CHS.10133.alt110	PHLDB1		-	53.9	FALSE
CHS.10133.alt111	PHLDB1		-	53.9	FALSE
CHS.10133.alt112	PHLDB1		-	53.9	FALSE
CHS.10133.alt113	PHLDB1		-	53.9	FALSE
CHS.10133.alt114	PHLDB1		-	53.6	TRUE
CHS.10133.alt115	PHLDB1		-	52.5	FALSE
CHS.10133.alt116	PHLDB1		-	53.2	FALSE
CHS.10133.alt117	PHLDB1		-	55	TRUE
CHS.10133.alt118	PHLDB1		-	53.6	TRUE
CHS.10133.alt119	PHLDB1		-	53.9	FALSE
CHS.10133.alt120	PHLDB1		-	53.6	TRUE
CHS.10133.alt121	PHLDB1		-	51.1	FALSE
CHS.10133.alt122	PHLDB1		-	52.5	FALSE
CHS.10133.alt123	PHLDB1		-	52.5	FALSE
CHS.10133.alt124	PHLDB1		-	52.5	FALSE
CHS.10133.alt125	PHLDB1		-	52.5	FALSE
CHS.10133.alt126	PHLDB1		-	74	FALSE
CHS.10133.alt127	PHLDB1		-	52.4	TRUE
CHS.10133.alt128	PHLDB1		ENST00000526374.5	60.7	TRUE
CHS.10133.alt129	PHLDB1		-	51.3	FALSE
CHS.10133.alt130	PHLDB1		-	51.3	FALSE
CHS.10133.alt131	PHLDB1		-	51.3	FALSE
CHS.10133.alt132	PHLDB1		ENST00000527898.5	72.9	TRUE
CHS.10133.alt133	PHLDB1		ENST00000392852.7	54.7	TRUE
CHS.10133.alt134	PHLDB1		ENST00000524713.5	65.1	TRUE
CHS.10133.alt135	PHLDB1		ENST00000531987.2	54.2	TRUE
CHS.10133.alt136	PHLDB1		ENST00000526537.2	86.8	TRUE
CHS.10133.alt137	PHLDB1		ENST00000620788.1	90.4	TRUE
CHS.10134.14	ARCN1	-	-	83.1	FALSE
CHS.10134.15	ARCN1	-	ENST00000359415.8	78.7	FALSE
CHS.10134.3	ARCN1	XM_005271542.5	-	79.4	TRUE
CHS.10134.4	ARCN1	NM_001655.5	ENST00000264028.5	83.1	TRUE
CHS.10134.5	ARCN1	NM_001142281.2	ENST00000392859.7	81.6	TRUE
CHS.10134.alt100	ARCN1	NM_001655.5	ENST00000264028.5	83.1	TRUE
CHS.10136.2	TREH	NM_001301065.2	ENST00000397925.2	89.8	TRUE
CHS.10136.3	TREH	NM_007180.3	ENST00000264029.9	91.4	TRUE
CHS.10136.5	TREH	-	-	90.6	TRUE
CHS.10136.6	TREH	-	-	78.2	TRUE
CHS.10136.9	TREH	-	-	89.3	TRUE
CHS.10136.alt100	TREH		-	90.6	TRUE
CHS.10136.alt101	TREH	NM_007180.3	ENST00000264029.9	91.4	TRUE
CHS.10136.alt102	TREH		-	73.4	FALSE
CHS.10136.alt103	TREH		-	92.4	FALSE
CHS.10138.1	LOC124902766	XM_047428001.1	-	64	FALSE
CHS.10138.10	LOC124902766	XM_047428000.1	-	64	FALSE
CHS.10138.3	LOC124902766	-	-	62.5	FALSE
CHS.10139.11	DDX6	NM_004397.6	ENST00000534980.7	83.2	TRUE
CHS.10139.13	DDX6	XM_005271417.5	-	83.2	TRUE
CHS.10139.5	DDX6	NM_001257191.3	ENST00000620157.4	83.2	TRUE
CHS.10139.8	DDX6	XM_017017251.2	-	76.4	TRUE
CHS.10139.9	DDX6	XM_011542645.2	-	80.7	TRUE
CHS.10139.alt100	DDX6		-	82.3	TRUE
CHS.10139.alt101	DDX6		-	83.2	FALSE
CHS.10139.alt102	DDX6		-	80.7	TRUE
CHS.10139.alt103	DDX6	NM_004397.6	ENST00000534980.7	83.2	TRUE
CHS.10139.alt104	DDX6	XM_011542644.1	-	76.4	TRUE
CHS.10139.alt105	DDX6	XM_024448377.1	-	83.2	FALSE
CHS.10139.alt106	DDX6		ENST00000529162.1	87.1	TRUE
CHS.10139.alt107	DDX6		ENST00000533239.1	60.2	TRUE
CHS.10143.3	CXCR5	NM_001716.5	ENST00000292174.5	80.1	TRUE
CHS.10143.4	CXCR5	NM_032966.2	-	83.2	TRUE
CHS.10143.alt100	CXCR5	NM_001716.5	ENST00000292174.5	80.1	TRUE
CHS.10145.3	BCL9L	NM_182557.4	ENST00000334801.7	42.2	TRUE
CHS.10145.31	BCL9L	NR_165445.1	-	46.4	TRUE
CHS.10145.5	BCL9L	XM_006718815.4	-	42.2	TRUE
CHS.10145.6	BCL9L	NM_001378213.1	ENST00000683865.1	42.2	TRUE
CHS.10149.1	UPK2	NM_006760.4	ENST00000264031.3	71.2	TRUE
CHS.10149.2	UPK2	-	-	67.8	TRUE
CHS.10149.8	UPK2	-	-	60.4	TRUE
CHS.10149.alt100	UPK2		-	67.8	TRUE
CHS.10149.alt101	UPK2		ENST00000534788.1	51.2	FALSE
CHS.10149.alt102	UPK2		-	77.8	TRUE
CHS.10149.alt103	UPK2	NM_006760.4	ENST00000264031.3	71.2	TRUE
CHS.10149.alt104	UPK2		-	60.4	TRUE
CHS.1015.1	PTPRU	NM_005704.5	ENST00000345512.7	81.8	TRUE
CHS.1015.alt100	PTPRU		ENST00000527027.1	85.4	FALSE
CHS.1015.alt101	PTPRU		-	83.3	TRUE
CHS.1015.alt102	PTPRU		-	83.1	TRUE
CHS.1015.alt103	PTPRU		ENST00000493601.5	86.6	TRUE
CHS.1015.alt104	PTPRU		ENST00000465525.6	90.1	TRUE
CHS.1015.alt105	PTPRU		ENST00000492954.1	95.7	TRUE
CHS.10150.4	FOXR1	NM_181721.3	ENST00000317011.8	62.7	TRUE
CHS.10150.alt100	FOXR1	XM_017017576.1	-	44.8	TRUE
CHS.10150.alt101	FOXR1	XM_017017575.1	-	60.9	TRUE
CHS.10150.alt102	FOXR1	XR_001747835.1	-	55.6	TRUE
CHS.10150.alt103	FOXR1	NM_181721.3	ENST00000317011.8	62.7	TRUE
CHS.10150.alt104	FOXR1		ENST00000533282.1	58.1	TRUE
CHS.10152.14	CENATAC	NR_104051.2	ENST00000526463.5	78.8	FALSE
CHS.10152.15	CENATAC	NR_104050.2	ENST00000532132.5	85.2	FALSE
CHS.10152.16	CENATAC	NR_104049.2	-	85.2	FALSE
CHS.10152.17	CENATAC	NM_198489.3	ENST00000334418.6	74.6	TRUE
CHS.10152.27	CENATAC	-	-	69.3	FALSE
CHS.10152.alt100	CENATAC		-	81.1	FALSE
CHS.10152.alt101	CENATAC		-	78.8	FALSE
CHS.10152.alt102	CENATAC		-	81.1	FALSE
CHS.10152.alt103	CENATAC		-	81.1	FALSE
CHS.10152.alt104	CENATAC		-	69.3	FALSE
CHS.10152.alt105	CENATAC		-	69.3	FALSE
CHS.10152.alt106	CENATAC	NR_104051.2	ENST00000526463.5	78.8	FALSE
CHS.10152.alt107	CENATAC	NR_104050.2	ENST00000532132.5	85.2	FALSE
CHS.10152.alt108	CENATAC	NR_104049.2	-	85.2	FALSE
CHS.10152.alt109	CENATAC	NM_198489.3	ENST00000334418.6	74.6	TRUE
CHS.10152.alt110	CENATAC		-	78.8	FALSE
CHS.10152.alt111	CENATAC		ENST00000524670.5	81.5	FALSE
CHS.10152.alt112	CENATAC		-	78.8	FALSE
CHS.10152.alt113	CENATAC		ENST00000534656.2	81.1	TRUE
CHS.10152.alt114	CENATAC		ENST00000528088.1	77.3	FALSE
CHS.10152.alt115	CENATAC		-	77.3	FALSE
CHS.10152.alt116	CENATAC		ENST00000583842.1	66.9	FALSE
CHS.10152.alt117	CENATAC		ENST00000527356.1	74.2	TRUE
CHS.10154.2	RPS25	NM_001028.3	ENST00000527673.2	75.5	TRUE
CHS.10154.alt100	RPS25		ENST00000532567.5	72.1	FALSE
CHS.10154.alt101	RPS25		ENST00000527791.5	63.9	TRUE
CHS.10154.alt102	RPS25	NM_001028.3	ENST00000527673.2	75.5	TRUE
CHS.10155.1	TRAPPC4	NM_001318492.2	ENST00000525079.5	79.4	FALSE
CHS.10155.19	TRAPPC4	-	ENST00000447216.2	84.4	TRUE
CHS.10155.2	TRAPPC4	NM_016146.6	ENST00000533632.6	86.8	TRUE
CHS.10155.3	TRAPPC4	NM_001318488.2	ENST00000359005.8	85.3	FALSE
CHS.10155.4	TRAPPC4	NM_001318486.2	ENST00000533012.1	57.2	TRUE
CHS.10155.5	TRAPPC4	NM_001318489.2	ENST00000434101.6	81.5	TRUE
CHS.10155.6	TRAPPC4	NM_001318490.2	ENST00000528230.5	80.5	TRUE
CHS.10155.7	TRAPPC4	NM_001318494.2	ENST00000525303.5	78.7	TRUE
CHS.10155.alt100	TRAPPC4		-	84.4	FALSE
CHS.10155.alt101	TRAPPC4		ENST00000447216.2	84.4	TRUE
CHS.10155.alt102	TRAPPC4	NM_001318492.2	ENST00000525079.5	79.4	FALSE
CHS.10155.alt103	TRAPPC4	NM_001318486.2	ENST00000533012.1	57.2	TRUE
CHS.10155.alt104	TRAPPC4		ENST00000531290.5	86.4	TRUE
CHS.10155.alt105	TRAPPC4	NM_016146.6	ENST00000533632.6	86.8	TRUE
CHS.10155.alt106	TRAPPC4		ENST00000533149.1	85.5	TRUE
CHS.10155.alt107	TRAPPC4		ENST00000524797.1	60	TRUE
CHS.10156.27	SLC37A4	-	-	84.7	FALSE
CHS.10156.28	SLC37A4	-	-	73	TRUE
CHS.10156.29	SLC37A4	-	-	84.7	TRUE
CHS.10156.31	SLC37A4	-	-	82.6	FALSE
CHS.10156.32	SLC37A4	-	-	84.7	TRUE
CHS.10156.37	SLC37A4	NM_001164277.2	-	84.2	FALSE
CHS.10156.38	SLC37A4	NM_001164279.2	-	85.3	FALSE
CHS.10156.39	SLC37A4	NM_001467.6	-	84.2	FALSE
CHS.10156.40	SLC37A4	NM_001164278.2	-	85.2	FALSE
CHS.10156.41	SLC37A4	NM_001164280.2	-	84.2	FALSE
CHS.10156.5	SLC37A4	-	ENST00000527992.5	84.7	TRUE
CHS.10156.7	SLC37A4	-	ENST00000525102.5	84.7	FALSE
CHS.10156.9	SLC37A4	-	-	82.6	TRUE
CHS.10156.alt100	SLC37A4		-	84.7	TRUE
CHS.10156.alt101	SLC37A4		-	78.7	TRUE
CHS.10156.alt102	SLC37A4		-	78.7	TRUE
CHS.10156.alt103	SLC37A4		-	82.6	TRUE
CHS.10156.alt104	SLC37A4		-	78.7	TRUE
CHS.10156.alt105	SLC37A4	NM_001164277.2	-	84.2	FALSE
CHS.10156.alt106	SLC37A4		ENST00000525102.5	84.7	FALSE
CHS.10156.alt107	SLC37A4		-	82.6	TRUE
CHS.10156.alt108	SLC37A4		-	84.7	TRUE
CHS.10156.alt109	SLC37A4		-	84.7	FALSE
CHS.10156.alt110	SLC37A4		ENST00000526275.5	84.7	TRUE
CHS.10156.alt111	SLC37A4		ENST00000532085.1	70.4	TRUE
CHS.10156.alt112	SLC37A4		-	73	TRUE
CHS.10156.alt113	SLC37A4		-	84.7	TRUE
CHS.10156.alt114	SLC37A4		-	82.6	FALSE
CHS.10156.alt115	SLC37A4		-	82.6	TRUE
CHS.10156.alt116	SLC37A4		ENST00000650539.1	82.6	TRUE
CHS.10156.alt117	SLC37A4		-	84.7	TRUE
CHS.10156.alt118	SLC37A4		ENST00000527992.5	84.7	TRUE
CHS.10156.alt119	SLC37A4		ENST00000638360.1	77.3	TRUE
CHS.10156.alt120	SLC37A4		ENST00000638186.1	84.7	FALSE
CHS.10156.alt121	SLC37A4		ENST00000530407.5	84.7	FALSE
CHS.10156.alt122	SLC37A4		ENST00000524428.5	62.1	TRUE
CHS.10156.alt123	SLC37A4		ENST00000525372.5	78.7	TRUE
CHS.10156.alt124	SLC37A4		ENST00000525039.5	82.6	FALSE
CHS.10156.alt125	SLC37A4		ENST00000532888.6	68.9	TRUE
CHS.10156.alt126	SLC37A4		ENST00000525787.1	62.1	TRUE
CHS.10157.10	HYOU1	XM_005271393.4	ENST00000694932.1	80.4	TRUE
CHS.10157.11	HYOU1	XM_017017095.2	ENST00000694935.1	80.4	FALSE
CHS.10157.12	HYOU1	XM_005271392.5	ENST00000652093.1	80.4	TRUE
CHS.10157.14	HYOU1	-	ENST00000694933.1	81.6	FALSE
CHS.10157.20	HYOU1	-	ENST00000612687.4	83.9	FALSE
CHS.10157.3	HYOU1	NM_001130991.3	ENST00000614711.5	80.3	TRUE
CHS.10157.4	HYOU1	NM_006389.5	ENST00000617285.5	80.3	FALSE
CHS.10157.7	HYOU1	XM_005271394.4	-	80.4	TRUE
CHS.10157.8	HYOU1	XM_017017096.2	ENST00000530473.6	80.3	TRUE
CHS.10157.9	HYOU1	XM_017017097.2	ENST00000534233.6	80.3	TRUE
CHS.10157.alt100	HYOU1		-	81.6	TRUE
CHS.10157.alt101	HYOU1	NM_006389.5	ENST00000617285.5	80.3	FALSE
CHS.10157.alt102	HYOU1		-	80.3	TRUE
CHS.10157.alt103	HYOU1		ENST00000622474.4	88	FALSE
CHS.10157.alt104	HYOU1		ENST00000526354.1	86.6	FALSE
CHS.10162.1	VPS11	NM_001290185.2	ENST00000614944.4	79.1	FALSE
CHS.10162.2	VPS11	NM_021729.6	ENST00000621676.5	81.8	TRUE
CHS.10162.25	VPS11	NR_165454.1	-	80.3	TRUE
CHS.10162.26	VPS11	NR_165449.1	-	80.3	TRUE
CHS.10162.27	VPS11	NR_165451.1	-	80.3	TRUE
CHS.10162.28	VPS11	NM_001378219.1	-	81	FALSE
CHS.10162.29	VPS11	NM_001378218.1	-	81	FALSE
CHS.10162.30	VPS11	NR_165453.1	-	81.8	FALSE
CHS.10162.33	VPS11	NR_165452.1	-	83.4	FALSE
CHS.10162.34	VPS11	NR_165450.1	-	80.3	TRUE
CHS.10162.35	VPS11	NR_165448.1	-	78.5	TRUE
CHS.10162.36	VPS11	NM_001378221.1	-	78.1	FALSE
CHS.10162.37	VPS11	NM_001378220.1	-	81.3	TRUE
CHS.10162.7	VPS11	NR_165447.1	-	80.3	FALSE
CHS.10162.alt100	VPS11		-	80.3	FALSE
CHS.10162.alt101	VPS11	NM_021729.6	ENST00000621676.5	81.8	TRUE
CHS.10162.alt102	VPS11	NR_165447.1	-	80.3	FALSE
CHS.10162.alt103	VPS11	NR_165452.1	-	83.4	FALSE
CHS.10162.alt104	VPS11	NR_165453.1	-	81.8	FALSE
CHS.10162.alt105	VPS11	NR_165448.1	-	78.5	TRUE
CHS.10162.alt106	VPS11	NR_165451.1	-	80.3	TRUE
CHS.10162.alt107	VPS11	NR_165454.1	-	80.3	TRUE
CHS.10162.alt108	VPS11	NR_165449.1	-	80.3	TRUE
CHS.10162.alt109	VPS11		-	80.3	FALSE
CHS.10162.alt110	VPS11		-	80.3	FALSE
CHS.10163.1	HMBS	XM_005271533.4	-	89.3	FALSE
CHS.10163.14	HMBS	NM_001024382.2	ENST00000392841.1	92.1	FALSE
CHS.10163.19	HMBS	XM_024448460.2	-	85.6	FALSE
CHS.10163.20	HMBS	-	ENST00000442944.7	88.8	FALSE
CHS.10163.25	HMBS	-	ENST00000543090.5	86.6	FALSE
CHS.10163.3	HMBS	NM_001258209.2	ENST00000542729.5	86.4	FALSE
CHS.10163.4	HMBS	NM_000190.4	ENST00000652429.1	89.1	FALSE
CHS.10163.5	HMBS	NM_001258208.2	ENST00000544387.5	86.2	FALSE
CHS.10163.8	HMBS	XM_005271531.2	ENST00000537841.5	92.1	FALSE
CHS.10163.alt100	HMBS		ENST00000545901.5	69.6	TRUE
CHS.10163.alt101	HMBS	NM_000190.4	ENST00000652429.1	89.1	FALSE
CHS.10163.alt102	HMBS	XM_005271532.1	-	92.1	FALSE
CHS.10163.alt103	HMBS		ENST00000640813.1	75.6	FALSE
CHS.10163.alt104	HMBS		ENST00000542044.5	89.4	FALSE
CHS.10163.alt105	HMBS		ENST00000535793.5	70.9	FALSE
CHS.10163.alt106	HMBS	XM_017017629.1	-	92.1	FALSE
CHS.10163.alt107	HMBS	XM_011542796.1	-	89.4	FALSE
CHS.10163.alt108	HMBS		ENST00000543543.5	88.4	FALSE
CHS.10163.alt109	HMBS		-	92.1	FALSE
CHS.10163.alt110	HMBS		ENST00000648374.1	92.1	FALSE
CHS.10163.alt111	HMBS		ENST00000544360.5	85.1	TRUE
CHS.10163.alt112	HMBS		ENST00000544182.1	78	TRUE
CHS.10164.1	H2AX	NM_002105.3	ENST00000530167.2	84.8	TRUE
CHS.10164.2	H2AX	-	ENST00000375167.1	84.8	TRUE
CHS.10164.alt100	H2AX	NM_002105.3	ENST00000530167.1	84.8	no_introns
CHS.10165.10	DPAGT1	XM_005271422.4	-	85.6	TRUE
CHS.10165.3	DPAGT1	NM_001382.4	ENST00000354202.9	92.8	TRUE
CHS.10165.40	DPAGT1	-	ENST00000683558.1	91.6	TRUE
CHS.10165.41	DPAGT1	-	ENST00000684315.1	85.3	TRUE
CHS.10165.49	DPAGT1	-	ENST00000639704.1	88	TRUE
CHS.10165.9	DPAGT1	-	ENST00000682326.1	90.3	TRUE
CHS.10165.alt100	DPAGT1		ENST00000682232.1	77.4	TRUE
CHS.10165.alt101	DPAGT1	XM_017017295.1	-	92.5	TRUE
CHS.10165.alt102	DPAGT1	XR_947801.2	-	85.8	TRUE
CHS.10165.alt103	DPAGT1	XR_001747785.2	ENST00000682946.1	89	TRUE
CHS.10165.alt104	DPAGT1	XM_017017294.2	-	89	TRUE
CHS.10165.alt105	DPAGT1	XM_017017293.2	ENST00000392834.7	93.5	TRUE
CHS.10165.alt106	DPAGT1	XM_011542648.2	-	85.3	TRUE
CHS.10165.alt107	DPAGT1	NM_001382.4	ENST00000354202.9	92.8	TRUE
CHS.10165.alt108	DPAGT1		ENST00000533687.1	70.4	TRUE
CHS.10165.alt109	DPAGT1		ENST00000481084.5	92.5	TRUE
CHS.10165.alt110	DPAGT1		ENST00000524658.2	87.8	TRUE
CHS.10165.alt111	DPAGT1		ENST00000683567.1	77.2	FALSE
CHS.10165.alt112	DPAGT1		ENST00000682811.1	79.1	FALSE
CHS.10165.alt113	DPAGT1		ENST00000682791.1	86.1	TRUE
CHS.10165.alt114	DPAGT1		ENST00000683143.1	93.5	TRUE
CHS.10165.alt115	DPAGT1		ENST00000683373.1	91.6	TRUE
CHS.10165.alt116	DPAGT1		ENST00000683955.1	79.5	TRUE
CHS.10165.alt117	DPAGT1		ENST00000682517.1	89.1	TRUE
CHS.10165.alt118	DPAGT1		ENST00000684252.1	91.1	TRUE
CHS.10165.alt119	DPAGT1		ENST00000445653.6	79.1	FALSE
CHS.10165.alt120	DPAGT1		ENST00000684142.1	79.1	TRUE
CHS.10165.alt121	DPAGT1		ENST00000682691.1	90.8	TRUE
CHS.10165.alt122	DPAGT1		ENST00000414373.5	81.5	TRUE
CHS.10165.alt123	DPAGT1		ENST00000682665.1	90.8	TRUE
CHS.10165.alt124	DPAGT1		ENST00000640747.1	93.5	TRUE
CHS.10165.alt125	DPAGT1		ENST00000640102.1	94.1	TRUE
CHS.10165.alt126	DPAGT1		ENST00000525456.5	89	TRUE
CHS.10165.alt127	DPAGT1		ENST00000472016.1	67.6	TRUE
CHS.10167.1	C2CD2L	NM_001382613.1	-	62.4	FALSE
CHS.10167.10	C2CD2L	NM_014807.5	ENST00000336702.7	62.7	TRUE
CHS.10167.11	C2CD2L	NM_001290474.2	ENST00000648610.2	62.4	TRUE
CHS.10167.6	C2CD2L	NM_001382611.1	-	58.8	TRUE
CHS.10167.7	C2CD2L	-	-	70.7	TRUE
CHS.10167.9	C2CD2L	NM_001382612.1	-	65.2	TRUE
CHS.10167.alt100	C2CD2L	XR_001748054.2	-	70.7	TRUE
CHS.10167.alt101	C2CD2L	XM_017018626.2	-	62.6	TRUE
CHS.10167.alt102	C2CD2L	XM_017018627.2	-	62.8	TRUE
CHS.10167.alt103	C2CD2L	XM_006718948.4	-	59.3	TRUE
CHS.10167.alt104	C2CD2L	NM_001290474.2	ENST00000648610.2	62.4	TRUE
CHS.10167.alt105	C2CD2L	XM_011543076.3	-	62.6	FALSE
CHS.10167.alt106	C2CD2L	XM_017018628.1	-	63.1	FALSE
CHS.10167.alt107	C2CD2L		ENST00000528586.2	62.1	TRUE
CHS.10169.1	HINFP	NM_015517.5	-	72.8	FALSE
CHS.10169.10	HINFP	NM_001351961.2	-	74.5	FALSE
CHS.10169.12	HINFP	NM_001351965.2	-	63.6	FALSE
CHS.10169.13	HINFP	NM_001351962.2	-	74.5	FALSE
CHS.10169.16	HINFP	NM_001351966.2	-	63.6	FALSE
CHS.10169.17	HINFP	NM_001351964.2	-	65.5	FALSE
CHS.10169.18	HINFP	NM_001351972.2	-	63.6	FALSE
CHS.10169.2	HINFP	NM_001243259.2	ENST00000527410.3	77.8	FALSE
CHS.10169.3	HINFP	NM_198971.3	ENST00000350777.7	72.8	FALSE
CHS.10169.34	HINFP	NM_001351971.2	-	63.6	FALSE
CHS.10169.37	HINFP	NM_001351957.2	-	71.1	FALSE
CHS.10169.4	HINFP	NM_001351974.2	-	63.6	FALSE
CHS.10169.5	HINFP	NM_001351958.2	-	72.8	FALSE
CHS.10169.6	HINFP	NM_001351969.2	-	63.6	TRUE
CHS.10169.7	HINFP	NM_001351963.2	-	65.5	TRUE
CHS.10169.8	HINFP	NM_001351960.2	-	72.8	FALSE
CHS.10169.9	HINFP	NM_001351959.2	-	72.8	FALSE
CHS.10169.alt100	HINFP		-	50.4	FALSE
CHS.10169.alt101	HINFP	NM_198971.3	ENST00000350777.7	72.8	FALSE
CHS.10169.alt102	HINFP		-	65.5	FALSE
CHS.10169.alt103	HINFP		ENST00000529354.1	80	FALSE
CHS.10169.alt104	HINFP		ENST00000532312.2	69.5	FALSE
CHS.10169.alt105	HINFP	XM_011542744.2	-	71.3	FALSE
CHS.10169.alt106	HINFP	XM_017017499.1	-	72.7	FALSE
CHS.10169.alt107	HINFP		ENST00000531022.5	80.6	TRUE
CHS.10169.alt108	HINFP		-	84.2	TRUE
CHS.10169.alt109	HINFP		ENST00000527755.5	63.6	TRUE
CHS.10169.alt110	HINFP		ENST00000529808.1	74.1	TRUE
CHS.10170.1	ABCG4	NM_022169.5	ENST00000619701.5	83.7	TRUE
CHS.10170.12	ABCG4	-	-	87	FALSE
CHS.10170.13	ABCG4	NM_001348192.2	-	86.6	FALSE
CHS.10170.3	ABCG4	-	-	86.6	FALSE
CHS.10170.4	ABCG4	NM_001348191.2	-	83.7	TRUE
CHS.10170.6	ABCG4	NM_001142505.1	ENST00000615496.4	83.7	TRUE
CHS.10170.alt100	ABCG4	NM_022169.5	ENST00000619701.5	83.7	TRUE
CHS.10170.alt101	ABCG4		-	86.6	FALSE
CHS.10170.alt102	ABCG4		-	87	FALSE
CHS.10170.alt103	ABCG4		-	87	FALSE
CHS.10170.alt104	ABCG4		-	87	FALSE
CHS.10170.alt105	ABCG4		ENST00000622721.1	84.6	TRUE
CHS.10170.alt106	ABCG4		ENST00000533694.5	74.7	TRUE
CHS.10170.alt107	ABCG4		-	87	TRUE
CHS.10170.alt108	ABCG4	XM_011542952.2	-	86	FALSE
CHS.10170.alt109	ABCG4		-	89.7	TRUE
CHS.10171.1	NLRX1	NM_001282358.2	ENST00000409265.8	77.9	TRUE
CHS.10171.10	NLRX1	NM_024618.4	ENST00000292199.6	77.9	FALSE
CHS.10171.11	NLRX1	NM_001282143.2	ENST00000409991.5	77.9	FALSE
CHS.10171.17	NLRX1	XM_047427586.1	-	75.2	FALSE
CHS.10171.28	NLRX1	-	-	77.5	FALSE
CHS.10171.33	NLRX1	-	-	83.8	FALSE
CHS.10171.7	NLRX1	XM_005271669.2	-	77.9	TRUE
CHS.10171.8	NLRX1	NM_001282144.2	ENST00000409109.6	77.9	FALSE
CHS.10171.9	NLRX1	-	-	82.7	TRUE
CHS.10171.alt100	NLRX1		-	78.2	FALSE
CHS.10171.alt101	NLRX1		-	82.7	TRUE
CHS.10171.alt102	NLRX1		-	75.2	FALSE
CHS.10171.alt103	NLRX1		-	75.4	FALSE
CHS.10171.alt104	NLRX1	XM_011542980.1	-	77.9	FALSE
CHS.10171.alt105	NLRX1	XM_005271671.1	-	82.7	TRUE
CHS.10171.alt106	NLRX1	NM_001282144.2	ENST00000409109.6	77.9	FALSE
CHS.10171.alt107	NLRX1		-	79.9	FALSE
CHS.10171.alt108	NLRX1		-	78.2	FALSE
CHS.10171.alt109	NLRX1		-	82.7	FALSE
CHS.10171.alt110	NLRX1		-	75.2	FALSE
CHS.10171.alt111	NLRX1		-	75.2	FALSE
CHS.10171.alt112	NLRX1		ENST00000481860.6	83.1	FALSE
CHS.10171.alt113	NLRX1	XM_005271672.1	-	82.7	FALSE
CHS.10171.alt114	NLRX1	XM_006718904.1	-	75.2	FALSE
CHS.10171.alt115	NLRX1	XM_005271670.1	-	82.7	FALSE
CHS.10171.alt116	NLRX1		ENST00000525863.1	75.2	FALSE
CHS.10171.alt117	NLRX1		-	77.9	TRUE
CHS.10171.alt118	NLRX1		ENST00000524562.1	74.4	TRUE
CHS.10171.alt119	NLRX1		ENST00000469103.3	74.3	FALSE
CHS.10172.11	PDZD3	XM_011543005.3	-	75.3	FALSE
CHS.10172.12	PDZD3	-	-	68.7	TRUE
CHS.10172.16	PDZD3	-	-	64.2	TRUE
CHS.10172.2	PDZD3	NR_033122.2	ENST00000525131.5	76.4	TRUE
CHS.10172.3	PDZD3	NM_001168468.2	ENST00000355547.10	76.2	TRUE
CHS.10172.4	PDZD3	NM_024791.4	ENST00000322712.4	73.1	FALSE
CHS.10172.alt100	PDZD3	XM_011543001.2	-	68.7	FALSE
CHS.10172.alt101	PDZD3		ENST00000527028.5	63.9	FALSE
CHS.10172.alt102	PDZD3		-	63.9	TRUE
CHS.10172.alt103	PDZD3	NR_033122.2	ENST00000525131.5	76.4	TRUE
CHS.10172.alt104	PDZD3	NM_001168468.2	ENST00000355547.10	76.2	TRUE
CHS.10172.alt105	PDZD3	XM_011543000.2	-	68.7	TRUE
CHS.10172.alt106	PDZD3		ENST00000531114.5	68.7	TRUE
CHS.10172.alt107	PDZD3		ENST00000533688.5	69	TRUE
CHS.10172.alt108	PDZD3	XM_011543002.2	-	68.7	FALSE
CHS.10173.1	CCDC153	-	-	88.8	FALSE
CHS.10173.14	CCDC153	NM_001145018.3	ENST00000503566.7	88.8	TRUE
CHS.10173.21	CCDC153	-	-	88	FALSE
CHS.10173.26	CCDC153	-	-	79.4	FALSE
CHS.10173.3	CCDC153	-	-	88	FALSE
CHS.10173.alt100	CCDC153		-	91.6	TRUE
CHS.10173.alt101	CCDC153		ENST00000503566.6	88.8	TRUE
CHS.10173.alt102	CCDC153		-	91.6	FALSE
CHS.10173.alt103	CCDC153		-	88.8	FALSE
CHS.10173.alt104	CCDC153		-	88	FALSE
CHS.10173.alt105	CCDC153		-	88.8	FALSE
CHS.10173.alt106	CCDC153		ENST00000375140.7	91.6	FALSE
CHS.10173.alt107	CCDC153		-	91.6	FALSE
CHS.10173.alt108	CCDC153		-	91.6	FALSE
CHS.10173.alt109	CCDC153		-	91.6	FALSE
CHS.10173.alt110	CCDC153		-	88	FALSE
CHS.10173.alt111	CCDC153		-	87.6	FALSE
CHS.10173.alt112	CCDC153		-	91.6	FALSE
CHS.10173.alt113	CCDC153	NM_001145018.3	-	88.8	TRUE
CHS.10173.alt114	CCDC153		-	91.6	FALSE
CHS.10173.alt115	CCDC153		ENST00000415318.2	88.8	FALSE
CHS.10173.alt116	CCDC153		-	91.6	FALSE
CHS.10174.3	CBL	NM_005188.4	ENST00000264033.6	60.3	FALSE
CHS.10174.alt100	CBL		-	81.4	FALSE
CHS.10174.alt101	CBL		-	83.4	TRUE
CHS.10174.alt102	CBL	NM_005188.4	ENST00000264033.6	60.3	FALSE
CHS.10174.alt103	CBL		ENST00000637974.1	58.8	FALSE
CHS.10175.10	MCAM	XM_017017760.3	-	82.8	TRUE
CHS.10175.11	MCAM	XM_017017761.3	-	83.8	TRUE
CHS.10175.17	MCAM	-	ENST00000528533.5	86.8	TRUE
CHS.10175.2	MCAM	NM_006500.3	ENST00000264036.6	80.3	TRUE
CHS.10175.21	MCAM	-	-	83.3	TRUE
CHS.10175.22	MCAM	-	-	79.2	FALSE
CHS.10175.8	MCAM	XM_017017762.3	-	82.1	TRUE
CHS.10175.9	MCAM	XM_017017759.3	-	79	TRUE
CHS.10175.alt100	MCAM	NM_006500.3	ENST00000264036.6	80.3	TRUE
CHS.10175.alt101	MCAM		-	78.5	FALSE
CHS.10175.alt102	MCAM		ENST00000530006.5	74.8	TRUE
CHS.10179.1	RNF26	NM_032015.5	ENST00000311413.5	75.5	TRUE
CHS.10179.alt100	RNF26	NM_032015.5	ENST00000311413.5	75.5	no_introns
CHS.10180.1	C1QTNF5	NM_001278431.2	ENST00000528368.3	78.6	TRUE
CHS.10180.7	C1QTNF5	-	ENST00000634633.1	68.2	TRUE
CHS.10180.alt100	C1QTNF5	NM_001278431.2	ENST00000528368.3	78.6	TRUE
CHS.10180.alt101	C1QTNF5		ENST00000530681.2	78.6	TRUE
CHS.10181.1	MFRP	NM_031433.4	ENST00000619721.6	73.3	TRUE
CHS.10181.alt100	MFRP	NM_031433.4	ENST00000619721.6	73.3	TRUE
CHS.10181.alt101	MFRP		ENST00000634542.1	43.7	TRUE
CHS.10182.11	USP2	XM_005271722.3	-	65.7	TRUE
CHS.10182.12	USP2	XM_005271721.6	-	65.7	TRUE
CHS.10182.2	USP2	NM_171997.3	ENST00000525735.1	85.3	TRUE
CHS.10182.7	USP2	NM_001243759.2	ENST00000455332.6	89	TRUE
CHS.10182.8	USP2	NM_004205.5	ENST00000260187.7	65.7	TRUE
CHS.10182.alt100	USP2		-	65.7	TRUE
CHS.10182.alt101	USP2	NM_004205.5	ENST00000260187.7	65.7	TRUE
CHS.10182.alt102	USP2		ENST00000525189.5	86.1	TRUE
CHS.10182.alt103	USP2		ENST00000532613.1	78.8	TRUE
CHS.10182.alt104	USP2		ENST00000531070.1	51.7	TRUE
CHS.10182.alt105	USP2		ENST00000527843.1	51.4	TRUE
CHS.10184.18	THY1	NM_001372050.1	ENST00000580275.5	84.9	FALSE
CHS.10184.23	THY1	NR_164077.1	-	79	TRUE
CHS.10184.4	THY1	NM_001311160.2	ENST00000528522.5	82.7	FALSE
CHS.10184.5	THY1	NM_006288.5	ENST00000284240.10	82.7	TRUE
CHS.10184.6	THY1	NM_001311162.2	ENST00000524659.1	82.7	FALSE
CHS.10184.alt100	THY1	NM_006288.5	ENST00000284240.10	82.7	TRUE
CHS.10184.alt101	THY1		-	82.7	TRUE
CHS.10184.alt102	THY1		-	82.7	FALSE
CHS.10184.alt103	THY1		ENST00000528295.5	66.7	TRUE
CHS.10184.alt104	THY1		ENST00000527590.5	79	TRUE
CHS.10184.alt105	THY1	NM_001311162.2	ENST00000524659.1	84	FALSE
CHS.10184.alt106	THY1		ENST00000532974.1	75.6	FALSE
CHS.10191.1	NECTIN1	NM_203285.2	ENST00000341398.6	80	TRUE
CHS.10191.6	NECTIN1	NM_002855.5	ENST00000264025.8	75.1	TRUE
CHS.10191.8	NECTIN1	NM_203286.2	ENST00000340882.2	88.3	FALSE
CHS.10191.alt100	NECTIN1	NM_002855.5	ENST00000264025.8	75.1	TRUE
CHS.10191.alt101	NECTIN1		-	78.7	TRUE
CHS.10191.alt102	NECTIN1		ENST00000532197.1	84.2	TRUE
CHS.10205.11	TRIM29	NM_001330382.2	ENST00000529044.5	66.8	TRUE
CHS.10205.14	TRIM29	NM_012101.4	ENST00000341846.10	59	TRUE
CHS.10205.9	TRIM29	XM_005271490.2	-	60.3	FALSE
CHS.10205.alt100	TRIM29		-	50.4	FALSE
CHS.10205.alt101	TRIM29		-	53.8	TRUE
CHS.10205.alt102	TRIM29		-	53.8	FALSE
CHS.10205.alt103	TRIM29	XM_011542733.1	-	63.9	FALSE
CHS.10205.alt104	TRIM29	XM_017017453.1	-	63.9	TRUE
CHS.10205.alt105	TRIM29		-	53.8	TRUE
CHS.10205.alt106	TRIM29	NM_012101.4	ENST00000341846.10	59	TRUE
CHS.10205.alt107	TRIM29		-	59	FALSE
CHS.10205.alt108	TRIM29		-	59	FALSE
CHS.10205.alt109	TRIM29		-	59	FALSE
CHS.10205.alt110	TRIM29		-	59	TRUE
CHS.10205.alt111	TRIM29		-	59	FALSE
CHS.10205.alt112	TRIM29		ENST00000526161.5	63.6	TRUE
CHS.10205.alt113	TRIM29		ENST00000530919.5	57.6	TRUE
CHS.10205.alt114	TRIM29		ENST00000525887.5	63.6	FALSE
CHS.10205.alt115	TRIM29		ENST00000533302.5	52.1	TRUE
CHS.10205.alt116	TRIM29		ENST00000525327.5	53.8	FALSE
CHS.10205.alt117	TRIM29		ENST00000528870.5	53.8	FALSE
CHS.10205.alt118	TRIM29		ENST00000526881.1	56.2	FALSE
CHS.10211.2	OAF	NM_178507.4	ENST00000328965.9	86.8	TRUE
CHS.10211.alt100	OAF		-	86.6	FALSE
CHS.10211.alt101	OAF		-	86.6	TRUE
CHS.10211.alt102	OAF		-	86.6	TRUE
CHS.10211.alt103	OAF		-	86.6	TRUE
CHS.10211.alt104	OAF	NM_178507.4	ENST00000328965.9	86.8	TRUE
CHS.10211.alt105	OAF		ENST00000531220.1	86.6	FALSE
CHS.10212.1	POU2F3	NM_001244682.2	ENST00000260264.8	55.3	FALSE
CHS.10212.5	POU2F3	NM_014352.4	ENST00000543440.7	55.3	FALSE
CHS.10212.alt100	POU2F3	NM_014352.4	ENST00000543440.7	55.3	FALSE
CHS.10212.alt101	POU2F3	XM_011542739.2	-	55.7	FALSE
CHS.10212.alt102	POU2F3	XM_011542740.2	-	55.7	FALSE
CHS.10212.alt103	POU2F3	XM_011542742.3	-	56.7	FALSE
CHS.10212.alt104	POU2F3	XM_011542741.3	-	56.7	FALSE
CHS.10212.alt105	POU2F3		-	53.4	FALSE
CHS.10212.alt106	POU2F3		ENST00000533620.5	54	FALSE
CHS.10212.alt107	POU2F3	XM_024448424.1	-	55.9	FALSE
CHS.10212.alt108	POU2F3		-	55.7	FALSE
CHS.10212.alt109	POU2F3		-	55.9	FALSE
CHS.10212.alt110	POU2F3		-	63.3	TRUE
CHS.10212.alt111	POU2F3		ENST00000532638.1	64.3	TRUE
CHS.10212.alt112	POU2F3		ENST00000529039.1	53.3	TRUE
CHS.10215.3	TLCD5	NM_001198670.2	ENST00000314475.6	91.7	FALSE
CHS.10215.4	TLCD5	NM_174926.3	ENST00000529187.1	85.1	FALSE
CHS.10215.5	TLCD5	NM_001198671.2	ENST00000375095.3	94.7	TRUE
CHS.10215.6	TLCD5	NM_001198674.2	-	88.7	TRUE
CHS.10215.7	TLCD5	NM_001198672.2	-	87.4	TRUE
CHS.10215.8	TLCD5	NM_001198673.2	-	87.4	TRUE
CHS.10215.9	TLCD5	NM_001198675.2	ENST00000531346.1	87.4	TRUE
CHS.10215.alt100	TLCD5		-	91.7	TRUE
CHS.10215.alt101	TLCD5	NM_001198671.2	ENST00000375095.3	94.7	TRUE
CHS.10215.alt102	TLCD5		-	85.1	TRUE
CHS.10215.alt103	TLCD5		-	94.7	FALSE
CHS.10217.7	ARHGEF12	NM_015313.3	ENST00000397843.7	60	FALSE
CHS.10217.alt100	ARHGEF12		ENST00000525960.1	87.2	TRUE
CHS.10217.alt101	ARHGEF12		ENST00000530747.5	88.7	TRUE
CHS.10217.alt102	ARHGEF12		ENST00000528681.1	66.6	TRUE
CHS.10218.1	GRIK4	NM_014619.5	ENST00000527524.8	78.8	FALSE
CHS.10218.18	GRIK4	-	-	78.8	FALSE
CHS.10218.5	GRIK4	NM_001282473.3	ENST00000533291.5	85.4	FALSE
CHS.10218.6	GRIK4	NM_001282470.3	ENST00000438375.2	78.8	FALSE
CHS.10218.8	GRIK4	XM_017017622.3	-	76.4	TRUE
CHS.10218.9	GRIK4	XM_011542784.3	-	78.3	TRUE
CHS.10218.alt100	GRIK4		ENST00000638419.1	78.8	TRUE
CHS.10218.alt101	GRIK4	NM_014619.5	ENST00000527524.8	78.8	FALSE
CHS.10218.alt102	GRIK4		-	76.4	FALSE
CHS.10218.alt103	GRIK4		-	76.9	FALSE
CHS.10218.alt104	GRIK4		-	76.9	FALSE
CHS.10218.alt105	GRIK4		-	78.8	FALSE
CHS.10218.alt106	GRIK4		-	76.9	FALSE
CHS.10218.alt107	GRIK4		-	78.8	FALSE
CHS.10218.alt108	GRIK4		-	79.1	FALSE
CHS.10218.alt109	GRIK4		-	67	TRUE
CHS.10218.alt110	GRIK4		-	39.6	TRUE
CHS.10218.alt111	GRIK4		-	67	TRUE
CHS.10218.alt112	GRIK4	XM_011542787.2	-	77.7	FALSE
CHS.10218.alt113	GRIK4		-	84.2	TRUE
CHS.10218.alt114	GRIK4		-	66.2	TRUE
CHS.10225.1	TBCEL	-	ENST00000284259.11	67.9	TRUE
CHS.10225.2	TBCEL	NM_001130047.3	ENST00000529397.5	89.3	TRUE
CHS.10225.23	TBCEL	-	-	89.5	FALSE
CHS.10225.3	TBCEL	NM_152715.5	ENST00000422003.6	89.3	TRUE
CHS.10225.5	TBCEL	NM_001363644.2	ENST00000683345.1	89.3	FALSE
CHS.10225.8	TBCEL	-	-	89.3	FALSE
CHS.10225.alt100	TBCEL	NM_001363644.2	ENST00000683345.1	89.3	FALSE
CHS.10225.alt101	TBCEL		ENST00000531148.5	64.6	FALSE
CHS.10225.alt102	TBCEL		ENST00000533712.5	67.9	TRUE
CHS.10225.alt103	TBCEL		ENST00000524726.1	85.8	FALSE
CHS.10225.alt104	TBCEL		ENST00000530362.1	51.3	TRUE
CHS.10225.alt105	TBCEL		ENST00000533169.1	90.1	TRUE
CHS.10226.22	TECTA	NM_005422.4	ENST00000392793.6	77.1	TRUE
CHS.10230.1	SC5D	NM_006918.5	ENST00000264027.9	91.3	FALSE
CHS.10230.10	SC5D	NM_001024956.3	ENST00000392789.2	91.3	FALSE
CHS.10230.7	SC5D	-	ENST00000531140.1	72.3	FALSE
CHS.10230.alt100	SC5D		ENST00000534455.5	86.7	FALSE
CHS.10230.alt101	SC5D		ENST00000524683.5	80.6	FALSE
CHS.10230.alt102	SC5D		ENST00000527762.5	93.3	FALSE
CHS.10230.alt103	SC5D	NM_006918.5	ENST00000264027.9	91.3	FALSE
CHS.10230.alt104	SC5D		ENST00000527183.1	86.2	TRUE
CHS.10234.26	SORL1	-	ENST00000527934.1	77	TRUE
CHS.10234.3	SORL1	NM_003105.6	ENST00000260197.12	73.2	FALSE
CHS.10234.alt100	SORL1		ENST00000534754.5	88.7	TRUE
CHS.10243.1	BLID	NM_001001786.3	ENST00000560104.2	44.9	TRUE
CHS.10243.alt100	BLID	NM_001001786.3	ENST00000560104.2	44.9	no_introns
CHS.10259.1	UBASH3B	NM_001363365.2	-	84.6	TRUE
CHS.10259.13	UBASH3B	-	-	82.4	TRUE
CHS.10259.2	UBASH3B	NM_032873.5	ENST00000284273.6	84.3	TRUE
CHS.10259.5	UBASH3B	XM_005271712.4	-	80.2	TRUE
CHS.10259.alt100	UBASH3B	NM_032873.5	ENST00000284273.6	84.3	TRUE
CHS.10259.alt101	UBASH3B		ENST00000525711.1	78.7	FALSE
CHS.10259.alt102	UBASH3B		ENST00000533451.1	90.8	TRUE
CHS.10259.alt103	UBASH3B		-	82.9	TRUE
CHS.10259.alt104	UBASH3B		-	79.9	TRUE
CHS.10261.2	CRTAM	NM_019604.4	ENST00000227348.9	73.1	TRUE
CHS.10261.4	CRTAM	-	-	62.8	TRUE
CHS.10261.6	CRTAM	NM_001304782.2	ENST00000533709.1	56.8	TRUE
CHS.10261.alt100	CRTAM		-	69.1	FALSE
CHS.10261.alt101	CRTAM		-	69.1	TRUE
CHS.10261.alt102	CRTAM	XM_011542900.2	-	66	TRUE
CHS.10261.alt103	CRTAM	NM_019604.4	ENST00000227348.9	73.1	TRUE
CHS.10261.alt104	CRTAM		-	69.1	TRUE
CHS.10261.alt105	CRTAM		-	62.8	TRUE
CHS.10261.alt106	CRTAM		-	62.8	TRUE
CHS.10261.alt107	CRTAM		ENST00000533416.1	62.8	TRUE
CHS.10262.11	JHY	NM_001363089.2	-	47.8	FALSE
CHS.10262.20	JHY	NM_001363087.2	-	47.9	FALSE
CHS.10262.22	JHY	-	-	55	FALSE
CHS.10262.3	JHY	NM_199124.3	ENST00000307257.10	54.6	FALSE
CHS.10262.4	JHY	NM_024806.4	ENST00000227349.7	47.8	FALSE
CHS.10262.9	JHY	NM_001363088.2	-	47.2	FALSE
CHS.10262.alt100	JHY		-	54	FALSE
CHS.10262.alt101	JHY	NM_024806.4	ENST00000227349.7	47.8	FALSE
CHS.10262.alt102	JHY		ENST00000531316.1	49.4	TRUE
CHS.10262.alt103	JHY		ENST00000534362.1	38.8	TRUE
CHS.10264.2	BSX	NM_001098169.2	ENST00000343035.3	63.3	TRUE
CHS.10264.alt100	BSX	NM_001098169.2	ENST00000343035.3	63.3	TRUE
CHS.10267.3	HSPA8	NM_153201.4	ENST00000453788.6	90.5	FALSE
CHS.10267.4	HSPA8	NM_006597.6	ENST00000534624.6	86.6	FALSE
CHS.10267.5	HSPA8	XM_011542798.2	-	86.6	FALSE
CHS.10267.alt100	HSPA8		ENST00000532636.5	86.6	FALSE
CHS.10267.alt101	HSPA8	NM_006597.6	ENST00000534624.6	86.6	FALSE
CHS.10267.alt102	HSPA8		ENST00000227378.7	86.6	TRUE
CHS.10267.alt103	HSPA8		ENST00000527983.5	91.6	FALSE
CHS.10269.16	CLMP	-	-	88.8	TRUE
CHS.10269.18	CLMP	-	-	82.7	FALSE
CHS.10269.8	CLMP	NM_024769.5	ENST00000448775.4	75.5	TRUE
CHS.10269.alt100	CLMP	NM_024769.5	ENST00000448775.4	75.5	TRUE
CHS.10269.alt101	CLMP		-	88.8	TRUE
CHS.10269.alt102	CLMP		-	61.8	FALSE
CHS.10269.alt103	CLMP		-	75.5	FALSE
CHS.10269.alt104	CLMP		-	75.5	FALSE
CHS.10269.alt105	CLMP		ENST00000530371.5	85.6	TRUE
CHS.10269.alt106	CLMP		ENST00000527977.5	72.7	TRUE
CHS.10269.alt107	CLMP		-	81.1	TRUE
CHS.10269.alt108	CLMP		ENST00000529128.1	47.3	TRUE
CHS.10278.17	GRAMD1B	NM_001387025.1	ENST00000635736.2	59	TRUE
CHS.10278.2	GRAMD1B	NM_001367419.2	-	63.5	TRUE
CHS.10278.21	GRAMD1B	NM_001387030.1	-	64.8	TRUE
CHS.10278.3	GRAMD1B	NM_001367418.2	-	63.9	TRUE
CHS.10278.30	GRAMD1B	NM_001387032.1	-	66.9	TRUE
CHS.10278.31	GRAMD1B	NM_001387033.1	-	66.9	TRUE
CHS.10278.32	GRAMD1B	NM_001330396.3	-	65	TRUE
CHS.10278.37	GRAMD1B	NM_001387029.1	-	65.2	TRUE
CHS.10278.38	GRAMD1B	NM_001286563.3	ENST00000456860.6	64.2	TRUE
CHS.10278.39	GRAMD1B	NM_020716.4	ENST00000529750.5	64.5	TRUE
CHS.10278.43	GRAMD1B	-	-	65	TRUE
CHS.10278.45	GRAMD1B	NM_001387031.1	ENST00000532581.5	64.8	TRUE
CHS.10278.46	GRAMD1B	NM_001387035.1	-	65	TRUE
CHS.10278.47	GRAMD1B	NM_001286564.3	ENST00000529432.5	66.9	TRUE
CHS.10278.51	GRAMD1B	XM_047427331.1	-	66.4	TRUE
CHS.10278.53	GRAMD1B	XM_011542933.2	ENST00000646146.1	66.4	TRUE
CHS.10278.61	GRAMD1B	NM_001367421.2	-	60.2	TRUE
CHS.10278.67	GRAMD1B	NM_001387026.1	-	58.5	TRUE
CHS.10278.72	GRAMD1B	NM_001387034.1	-	65	TRUE
CHS.10278.83	GRAMD1B	NM_001387028.1	-	63.2	FALSE
CHS.10278.90	GRAMD1B	NM_001367420.2	-	62.4	FALSE
CHS.10278.95	GRAMD1B	NM_001387024.1	-	58.2	FALSE
CHS.10278.alt100	GRAMD1B	XM_024448624.1	-	61.1	FALSE
CHS.10278.alt101	GRAMD1B		-	66.9	TRUE
CHS.10278.alt102	GRAMD1B		-	59	TRUE
CHS.10278.alt103	GRAMD1B		-	61.1	FALSE
CHS.10278.alt104	GRAMD1B	XM_024448623.1	-	61.1	FALSE
CHS.10278.alt105	GRAMD1B		-	59	TRUE
CHS.10278.alt106	GRAMD1B		-	60.2	TRUE
CHS.10278.alt107	GRAMD1B		-	66.7	FALSE
CHS.10278.alt108	GRAMD1B	NM_001354837.2	ENST00000533341.3	61.1	FALSE
CHS.10278.alt109	GRAMD1B	NM_001387025.1	ENST00000635736.2	59	TRUE
CHS.10278.alt110	GRAMD1B		ENST00000640939.1	51.8	FALSE
CHS.10278.alt111	GRAMD1B		-	66.7	TRUE
CHS.10278.alt112	GRAMD1B		-	66.7	FALSE
CHS.10278.alt113	GRAMD1B		-	66.7	FALSE
CHS.10278.alt114	GRAMD1B		-	66.7	FALSE
CHS.10278.alt115	GRAMD1B		-	66.7	FALSE
CHS.10278.alt116	GRAMD1B		-	66.7	FALSE
CHS.10278.alt117	GRAMD1B		-	66.7	FALSE
CHS.10278.alt118	GRAMD1B		-	66.7	FALSE
CHS.10278.alt119	GRAMD1B		-	66.7	FALSE
CHS.10278.alt120	GRAMD1B		-	66.7	FALSE
CHS.10278.alt121	GRAMD1B		ENST00000638086.1	66.9	TRUE
CHS.10278.alt122	GRAMD1B	XM_017018046.1	-	64.8	TRUE
CHS.10278.alt123	GRAMD1B		-	64.5	FALSE
CHS.10278.alt124	GRAMD1B		-	65.2	FALSE
CHS.10278.alt125	GRAMD1B		-	66.7	TRUE
CHS.10278.alt126	GRAMD1B	XM_005271619.4	-	63.1	TRUE
CHS.10278.alt127	GRAMD1B		-	66.7	FALSE
CHS.10278.alt128	GRAMD1B	XM_005271624.4	-	64.8	FALSE
CHS.10278.alt129	GRAMD1B	XM_017018043.1	-	64.1	FALSE
CHS.10278.alt130	GRAMD1B		-	65	TRUE
CHS.10278.alt131	GRAMD1B		-	66.9	TRUE
CHS.10278.alt132	GRAMD1B		-	71	TRUE
CHS.10278.alt133	GRAMD1B		ENST00000450171.2	71.4	TRUE
CHS.10278.alt134	GRAMD1B		-	65.8	TRUE
CHS.10278.alt135	GRAMD1B		ENST00000525945.1	65.9	TRUE
CHS.10280.15	SCN3B	-	ENST00000667790.1	86.6	FALSE
CHS.10280.4	SCN3B	XM_011542897.3	-	84.7	FALSE
CHS.10280.5	SCN3B	NM_001040151.2	ENST00000299333.8	84.7	FALSE
CHS.10280.6	SCN3B	NM_018400.4	ENST00000392770.6	84.7	FALSE
CHS.10280.alt100	SCN3B		-	65.6	FALSE
CHS.10280.alt101	SCN3B		-	78.4	FALSE
CHS.10280.alt102	SCN3B		-	71.7	FALSE
CHS.10280.alt103	SCN3B		ENST00000655686.1	83	FALSE
CHS.10280.alt104	SCN3B		-	55.3	FALSE
CHS.10280.alt105	SCN3B	NM_001040151.2	ENST00000299333.8	84.7	FALSE
CHS.10280.alt106	SCN3B		-	65.6	FALSE
CHS.10280.alt107	SCN3B		-	84.7	FALSE
CHS.10280.alt108	SCN3B		-	86.6	FALSE
CHS.10280.alt109	SCN3B		ENST00000657191.1	84.7	FALSE
CHS.10280.alt110	SCN3B		ENST00000657123.1	84.7	FALSE
CHS.10280.alt111	SCN3B		ENST00000659826.1	59.2	FALSE
CHS.10280.alt112	SCN3B		ENST00000667790.1	86.6	FALSE
CHS.10280.alt113	SCN3B		ENST00000530277.5	84.7	TRUE
CHS.10282.1	ZNF202	NM_001301819.1	-	56.6	TRUE
CHS.10282.10	ZNF202	-	-	56.6	TRUE
CHS.10282.11	ZNF202	XM_011542972.2	-	56	TRUE
CHS.10282.15	ZNF202	XM_005271659.2	-	56	FALSE
CHS.10282.2	ZNF202	NM_001301780.2	ENST00000529691.1	56	TRUE
CHS.10282.3	ZNF202	NM_003455.4	ENST00000530393.6	56	TRUE
CHS.10282.4	ZNF202	NM_001301779.2	ENST00000336139.8	56	FALSE
CHS.10282.5	ZNF202	-	-	56.6	TRUE
CHS.10282.6	ZNF202	-	-	56.6	FALSE
CHS.10282.alt100	ZNF202	NM_003455.4	ENST00000530393.6	56	TRUE
CHS.10282.alt101	ZNF202		-	56.6	TRUE
CHS.10282.alt102	ZNF202		-	56.6	TRUE
CHS.10282.alt103	ZNF202		-	56	TRUE
CHS.10282.alt104	ZNF202	NM_001301819.1	-	56.6	TRUE
CHS.10282.alt105	ZNF202		-	65.9	TRUE
CHS.10282.alt106	ZNF202		-	56.6	TRUE
CHS.10282.alt107	ZNF202		-	65.9	FALSE
CHS.10282.alt108	ZNF202	XM_006718901.2	-	56	FALSE
CHS.10282.alt109	ZNF202	XM_017018268.2	-	56	FALSE
CHS.10282.alt110	ZNF202	XM_011542973.1	-	56	FALSE
CHS.10282.alt111	ZNF202	XM_005271660.1	-	56	FALSE
CHS.10282.alt112	ZNF202	XM_005271661.1	-	56	TRUE
CHS.10282.alt113	ZNF202	XM_024448682.1	-	56.6	FALSE
CHS.10282.alt114	ZNF202	XM_005271664.2	-	56.6	TRUE
CHS.10284.1	OR6X1	NM_001005188.1	ENST00000327930.3	86	TRUE
CHS.10284.alt100	OR6X1	NM_001005188.1	ENST00000327930.3	86	no_introns
CHS.10286.1	OR6M1	NM_001005325.1	ENST00000309154.3	88.6	TRUE
CHS.10286.alt100	OR6M1	NM_001005325.1	ENST00000309154.3	88.6	no_introns
CHS.10287.1	TMEM225	-	-	59.5	FALSE
CHS.10287.2	TMEM225	NM_001363605.2	ENST00000528595.1	59.1	FALSE
CHS.10287.5	TMEM225	NM_001013743.3	ENST00000375026.7	74.3	TRUE
CHS.10287.alt100	TMEM225		-	59.5	FALSE
CHS.10287.alt101	TMEM225		-	80.3	FALSE
CHS.10287.alt102	TMEM225	NM_001013743.3	ENST00000375026.7	74.3	TRUE
CHS.10287.alt103	TMEM225	XM_011542802.3	-	55.2	TRUE
CHS.10289.1	OR4D5	NM_001001965.1	ENST00000307033.3	86.8	TRUE
CHS.10289.alt100	OR4D5	NM_001001965.1	ENST00000307033.3	86.8	no_introns
CHS.1029.1	MATN1	NM_002379.3	ENST00000373765.5	84.9	TRUE
CHS.1029.6	MATN1	-	-	81.8	FALSE
CHS.1029.8	MATN1	-	-	74.1	TRUE
CHS.1029.alt100	MATN1		-	83.1	TRUE
CHS.1029.alt101	MATN1		-	86	TRUE
CHS.1029.alt102	MATN1	NM_002379.3	ENST00000373765.5	84.9	TRUE
CHS.1029.alt103	MATN1		ENST00000477320.1	67.5	TRUE
CHS.10290.2	OR6T1	NM_001005187.1	ENST00000321252.3	78	TRUE
CHS.10290.alt100	OR6T1	XM_017017325.1	-	76.1	FALSE
CHS.10290.alt101	OR6T1	NM_001005187.1	ENST00000321252.3	78	no_introns
CHS.10291.1	OR10S1	NM_001004474.2	ENST00000641123.1	85	TRUE
CHS.10291.alt100	OR10S1	NM_001004474.1	ENST00000641123.1	85	no_introns
CHS.10293.1	OR10G9	NM_001001953.1	ENST00000375024.1	87.5	TRUE
CHS.10293.alt100	OR10G9	NM_001001953.1	ENST00000375024.1	87.5	no_introns
CHS.10299.1	VWA5A	NM_198315.3	ENST00000361352.9	84	TRUE
CHS.10299.3	VWA5A	NM_001130142.2	ENST00000456829.7	83.6	FALSE
CHS.10299.4	VWA5A	NM_014622.5	ENST00000392748.5	83.6	FALSE
CHS.10299.alt100	VWA5A		ENST00000449321.5	84	FALSE
CHS.10299.alt101	VWA5A		-	84	TRUE
CHS.10299.alt102	VWA5A	XM_011542828.2	-	82.5	FALSE
CHS.10299.alt103	VWA5A		-	83.6	FALSE
CHS.10299.alt104	VWA5A		ENST00000392744.4	82.8	FALSE
CHS.10299.alt105	VWA5A	NM_001130142.2	ENST00000456829.7	83.6	FALSE
CHS.10299.alt106	VWA5A		ENST00000533623.1	54.8	TRUE
CHS.10299.alt107	VWA5A		-	41.7	TRUE
CHS.103.10	ATAD3B	NM_031921.6	ENST00000673477.1	74.5	FALSE
CHS.103.13	ATAD3B	NM_001317238.2	ENST00000472194.6	75	FALSE
CHS.103.20	ATAD3B	-	-	75	FALSE
CHS.103.21	ATAD3B	-	-	74.2	FALSE
CHS.103.22	ATAD3B	-	-	80.1	FALSE
CHS.103.5	ATAD3B	-	-	71	FALSE
CHS.103.6	ATAD3B	-	-	71.5	FALSE
CHS.103.7	ATAD3B	XM_005244806.4	-	78.2	FALSE
CHS.103.9	ATAD3B	-	-	74.2	FALSE
CHS.103.alt100	ATAD3B	XR_241045.2	-	71	FALSE
CHS.103.alt101	ATAD3B	XR_001737470.1	-	78.7	FALSE
CHS.103.alt102	ATAD3B	XR_001737469.1	-	74.2	FALSE
CHS.103.alt103	ATAD3B	NM_031921.6	ENST00000673477.1	74.5	FALSE
CHS.103.alt104	ATAD3B		-	74.2	FALSE
CHS.103.alt105	ATAD3B		-	80.1	FALSE
CHS.103.alt106	ATAD3B		-	75	FALSE
CHS.103.alt107	ATAD3B	NM_001317238.2	ENST00000472194.6	75	FALSE
CHS.103.alt108	ATAD3B		ENST00000378736.3	89.3	TRUE
CHS.103.alt109	ATAD3B		ENST00000485748.5	72.8	FALSE
CHS.103.alt110	ATAD3B		-	61	FALSE
CHS.103.alt111	ATAD3B		-	56	FALSE
CHS.103.alt112	ATAD3B		ENST00000641679.1	61	TRUE
CHS.103.alt113	ATAD3B		-	74.8	FALSE
CHS.10304.11	OR8G5	NM_001005198.2	ENST00000641992.2	86.4	FALSE
CHS.10304.alt100	OR8G5	NM_001002905.2	ENST00000641972.1	89.4	FALSE
CHS.10304.alt101	OR8G5	NM_001005198.2	ENST00000641992.2	86.4	FALSE
CHS.10304.alt102	OR8G5		ENST00000641707.1	86.4	no_introns
CHS.10305.2	OR8G1	NM_001002905.2	ENST00000641972.1	89.4	FALSE
CHS.10306.2	OR8D1	NM_001002917.2	ENST00000641015.1	89.9	FALSE
CHS.10306.alt100	OR8D1	NM_001002917.2	ENST00000641015.1	89.9	FALSE
CHS.10306.alt101	OR8D1		ENST00000357821.2	89.9	no_introns
CHS.10307.1	OR8D2	NM_001002918.1	ENST00000624618.2	86.2	TRUE
CHS.10307.alt100	OR8D2	NM_001002918.1	ENST00000624618.2	86.2	no_introns
CHS.10309.4	OR8B2	NM_001005468.2	ENST00000641451.2	89.3	TRUE
CHS.10309.alt100	OR8B2	NM_001005468.2	ENST00000641451.2	89.3	TRUE
CHS.10311.1	OR8B4	NM_001005196.1	ENST00000356130.7	87.6	TRUE
CHS.10311.alt100	OR8B4	NM_001005196.1	ENST00000356130.7	87.6	no_introns
CHS.10314.1	OR8B12	NM_001005195.1	ENST00000306842.3	87.9	TRUE
CHS.10314.alt100	OR8B12	NM_001005195.1	ENST00000306842.3	87.9	no_introns
CHS.10315.1	OR8A1	NM_001005194.2	ENST00000284287.6	89	TRUE
CHS.10315.alt100	OR8A1	NM_001005194.2	ENST00000284287.6	89	no_introns
CHS.10315.alt101	OR8A1		ENST00000641165.1	60.7	FALSE
CHS.10316.1	PANX3	NM_052959.3	ENST00000284288.3	79.2	TRUE
CHS.10316.alt100	PANX3	NM_052959.3	ENST00000284288.3	79.2	TRUE
CHS.10317.23	TBRG1	-	-	73.1	TRUE
CHS.10317.35	TBRG1	-	-	73.1	TRUE
CHS.10317.6	TBRG1	NM_032811.3	ENST00000441174.8	69.8	TRUE
CHS.10317.7	TBRG1	NR_016021.2	ENST00000284290.8	70.7	TRUE
CHS.10317.alt100	TBRG1		ENST00000473629.6	73.1	TRUE
CHS.10317.alt101	TBRG1		-	73.1	TRUE
CHS.10317.alt102	TBRG1		-	73.1	FALSE
CHS.10317.alt103	TBRG1	XM_005271709.4	-	74.1	TRUE
CHS.10317.alt104	TBRG1		-	73.1	TRUE
CHS.10317.alt105	TBRG1		-	73.1	TRUE
CHS.10317.alt106	TBRG1		-	78.6	TRUE
CHS.10317.alt107	TBRG1	XM_017018442.2	-	70.7	TRUE
CHS.10317.alt108	TBRG1	XR_001748011.2	-	61.2	FALSE
CHS.10317.alt109	TBRG1	XR_428983.4	-	63	FALSE
CHS.10317.alt110	TBRG1	XR_001748012.2	-	67	TRUE
CHS.10317.alt111	TBRG1		-	73.1	FALSE
CHS.10317.alt112	TBRG1		-	73.1	TRUE
CHS.10317.alt113	TBRG1		-	67.6	TRUE
CHS.10317.alt114	TBRG1		-	70.5	TRUE
CHS.10317.alt115	TBRG1		-	78.6	TRUE
CHS.10317.alt116	TBRG1	NM_032811.3	ENST00000441174.8	69.8	TRUE
CHS.10317.alt117	TBRG1	NR_016021.2	ENST00000284290.8	70.7	TRUE
CHS.10317.alt118	TBRG1		ENST00000531667.5	83.6	TRUE
CHS.10317.alt119	TBRG1		-	67.6	TRUE
CHS.10317.alt120	TBRG1		ENST00000529543.5	75.3	TRUE
CHS.10317.alt121	TBRG1		-	73.1	FALSE
CHS.10317.alt122	TBRG1		ENST00000438907.3	73.1	FALSE
CHS.10317.alt123	TBRG1		ENST00000491010.2	90.2	TRUE
CHS.10317.alt124	TBRG1		ENST00000531033.1	65.7	TRUE
CHS.10318.3	SIAE	NM_170601.5	ENST00000263593.8	91.1	FALSE
CHS.10318.5	SIAE	NM_001199922.2	ENST00000618733.4	93.6	FALSE
CHS.10318.6	SIAE	-	-	91.6	FALSE
CHS.10318.alt100	SIAE	NM_170601.5	ENST00000263593.8	91.1	FALSE
CHS.10318.alt101	SIAE		-	91.6	FALSE
CHS.10318.alt102	SIAE		ENST00000545756.5	93.6	FALSE
CHS.10318.alt103	SIAE	XM_017017930.1	-	91.6	FALSE
CHS.10318.alt104	SIAE		-	91.6	FALSE
CHS.10318.alt105	SIAE		-	91.6	FALSE
CHS.10318.alt106	SIAE		-	91.6	FALSE
CHS.10319.3	SPA17	NM_017425.4	ENST00000227135.7	75.6	TRUE
CHS.10319.alt100	SPA17		ENST00000532692.1	75.6	TRUE
CHS.10319.alt101	SPA17	NM_017425.4	ENST00000227135.7	75.6	TRUE
CHS.10319.alt102	SPA17		ENST00000529498.1	71.4	TRUE
CHS.10319.alt103	SPA17		-	75.6	TRUE
CHS.10319.alt104	SPA17	XM_024448583.1	-	75.6	TRUE
CHS.10319.alt105	SPA17	XM_011542870.2	-	75.6	FALSE
CHS.1032.16	LAPTM5	-	-	55.2	FALSE
CHS.1032.5	LAPTM5	NM_006762.3	ENST00000294507.4	69	TRUE
CHS.1032.alt100	LAPTM5	NM_006762.3	ENST00000294507.4	69	TRUE
CHS.1032.alt101	LAPTM5		-	66.7	TRUE
CHS.1032.alt102	LAPTM5	XM_011542098.2	-	58.7	TRUE
CHS.1032.alt103	LAPTM5		-	55.2	FALSE
CHS.1032.alt104	LAPTM5		-	69	FALSE
CHS.1032.alt105	LAPTM5		ENST00000464569.1	60.5	FALSE
CHS.10322.10	NRGN	NM_006176.3	ENST00000284292.11	64.4	TRUE
CHS.10322.9	NRGN	NM_001126181.2	ENST00000412681.2	64.4	FALSE
CHS.10322.alt100	NRGN	NM_006176.3	ENST00000284292.11	64.4	TRUE
CHS.10322.alt101	NRGN		-	63.7	TRUE
CHS.10323.1	VSIG2	NM_014312.5	ENST00000326621.10	80.7	TRUE
CHS.10323.13	VSIG2	NM_001329920.2	ENST00000403470.1	87	TRUE
CHS.10323.alt100	VSIG2	NM_014312.5	ENST00000326621.10	80.7	TRUE
CHS.10324.10	ESAM	-	ENST00000417453.5	88.5	TRUE
CHS.10324.20	ESAM	-	-	85.1	FALSE
CHS.10324.4	ESAM	-	ENST00000485116.5	75.1	TRUE
CHS.10324.5	ESAM	NM_138961.3	ENST00000278927.10	74.8	TRUE
CHS.10324.9	ESAM	-	-	58	TRUE
CHS.10324.alt100	ESAM		-	92.6	TRUE
CHS.10324.alt101	ESAM		-	83.4	FALSE
CHS.10324.alt102	ESAM		-	75.7	TRUE
CHS.10324.alt103	ESAM	NM_138961.3	ENST00000278927.10	74.8	TRUE
CHS.10324.alt104	ESAM		ENST00000464067.1	65.8	TRUE
CHS.10324.alt105	ESAM		ENST00000435477.1	87.1	TRUE
CHS.10326.10	MSANTD2	NM_001312919.2	ENST00000524950.1	79.4	TRUE
CHS.10326.11	MSANTD2	NM_024631.4	ENST00000674284.1	66.3	TRUE
CHS.10326.12	MSANTD2	NM_001312921.2	ENST00000527140.1	76.2	TRUE
CHS.10326.13	MSANTD2	NM_001308027.2	ENST00000374979.8	63.9	TRUE
CHS.10326.26	MSANTD2	-	-	76.2	TRUE
CHS.10326.7	MSANTD2	NM_001352401.2	-	76.2	TRUE
CHS.10326.8	MSANTD2	NM_001352400.2	-	76.2	TRUE
CHS.10326.9	MSANTD2	NM_001312920.2	ENST00000526629.1	76.2	TRUE
CHS.10326.alt100	MSANTD2	XM_006718905.2	-	76.2	TRUE
CHS.10326.alt101	MSANTD2	XM_017018296.2	-	76.2	TRUE
CHS.10326.alt102	MSANTD2	XM_017018297.1	ENST00000650095.1	76.2	FALSE
CHS.10326.alt103	MSANTD2	XM_017018298.2	-	76.2	FALSE
CHS.10326.alt104	MSANTD2	NM_001312920.2	ENST00000526629.1	76.2	TRUE
CHS.10326.alt105	MSANTD2	NM_001308027.2	ENST00000374979.8	63.9	TRUE
CHS.10326.alt106	MSANTD2		-	76.2	TRUE
CHS.10326.alt107	MSANTD2	NM_024631.4	ENST00000674284.1	66.3	TRUE
CHS.10326.alt108	MSANTD2		-	76.2	FALSE
CHS.10326.alt109	MSANTD2	XR_002957196.1	-	54	TRUE
CHS.10326.alt110	MSANTD2		ENST00000533514.1	60.8	TRUE
CHS.10326.alt111	MSANTD2	XM_011542981.3	-	90.1	FALSE
CHS.10326.alt112	MSANTD2	XM_011542982.3	-	91.2	TRUE
CHS.10326.alt113	MSANTD2	XM_005271674.4	ENST00000634413.1	54	TRUE
CHS.10328.1	ROBO3	NM_022370.4	ENST00000397801.6	63.8	FALSE
CHS.10328.11	ROBO3	NR_163412.1	ENST00000525448.5	50.6	FALSE
CHS.10328.15	ROBO3	-	-	50.6	FALSE
CHS.10328.24	ROBO3	-	-	50.6	FALSE
CHS.10328.29	ROBO3	-	-	50.6	FALSE
CHS.10328.30	ROBO3	NM_001370358.1	ENST00000525482.5	46.2	FALSE
CHS.10328.32	ROBO3	-	-	50.6	FALSE
CHS.10328.33	ROBO3	NM_001370364.1	-	47.4	FALSE
CHS.10328.34	ROBO3	NR_163414.1	-	50.6	FALSE
CHS.10328.35	ROBO3	NM_001370366.1	-	47.4	FALSE
CHS.10328.37	ROBO3	-	-	50.6	FALSE
CHS.10328.4	ROBO3	NM_001370356.1	ENST00000527196.5	46.2	FALSE
CHS.10328.40	ROBO3	NR_163410.1	-	50.6	FALSE
CHS.10328.41	ROBO3	-	-	50.6	FALSE
CHS.10328.42	ROBO3	-	-	50.6	FALSE
CHS.10328.43	ROBO3	-	-	50.6	FALSE
CHS.10328.44	ROBO3	NM_001370359.1	-	46.2	FALSE
CHS.10328.45	ROBO3	-	-	50.6	FALSE
CHS.10328.48	ROBO3	-	-	50.6	FALSE
CHS.10328.49	ROBO3	NM_001370361.1	-	46.2	FALSE
CHS.10328.50	ROBO3	NM_001370357.1	-	46.2	FALSE
CHS.10328.51	ROBO3	NR_163411.1	-	50.6	FALSE
CHS.10328.53	ROBO3	-	-	50.8	FALSE
CHS.10328.7	ROBO3	-	-	46.2	FALSE
CHS.10328.alt100	ROBO3		-	56.4	FALSE
CHS.10328.alt101	ROBO3		-	47.4	FALSE
CHS.10328.alt102	ROBO3		-	56.4	FALSE
CHS.10328.alt103	ROBO3		-	56.4	FALSE
CHS.10328.alt104	ROBO3		-	56.4	FALSE
CHS.10328.alt105	ROBO3		ENST00000527245.5	56.4	FALSE
CHS.10328.alt106	ROBO3		-	56.4	FALSE
CHS.10328.alt107	ROBO3		ENST00000529658.5	56.4	FALSE
CHS.10328.alt108	ROBO3	NR_163412.1	ENST00000525448.5	50.6	FALSE
CHS.10328.alt109	ROBO3		-	46.2	FALSE
CHS.10328.alt110	ROBO3		-	56.4	FALSE
CHS.10328.alt111	ROBO3		-	56.4	FALSE
CHS.10328.alt112	ROBO3		-	56.4	FALSE
CHS.10328.alt113	ROBO3		-	56.4	FALSE
CHS.10328.alt114	ROBO3		-	56.4	FALSE
CHS.10328.alt115	ROBO3		-	46.2	FALSE
CHS.10328.alt116	ROBO3	NR_163410.1	-	56.4	FALSE
CHS.10328.alt117	ROBO3		-	56.4	FALSE
CHS.10328.alt118	ROBO3		-	56.4	FALSE
CHS.10328.alt119	ROBO3		-	56.4	FALSE
CHS.10328.alt120	ROBO3		-	56.4	FALSE
CHS.10328.alt121	ROBO3		-	56.4	FALSE
CHS.10328.alt122	ROBO3	NR_163414.1	-	56.4	FALSE
CHS.10328.alt123	ROBO3		-	56.4	FALSE
CHS.10328.alt124	ROBO3		-	56.4	FALSE
CHS.10328.alt125	ROBO3		-	56.4	FALSE
CHS.10328.alt126	ROBO3	NR_163411.1	-	56.4	FALSE
CHS.10328.alt127	ROBO3		-	56.4	FALSE
CHS.10328.alt128	ROBO3		-	56.4	FALSE
CHS.10328.alt129	ROBO3		-	46.2	FALSE
CHS.10328.alt130	ROBO3		-	56.4	FALSE
CHS.10328.alt131	ROBO3		-	56.4	FALSE
CHS.10328.alt132	ROBO3		-	56.4	FALSE
CHS.10329.4	ROBO4	NM_001301088.2	ENST00000533054.5	52.8	FALSE
CHS.10329.5	ROBO4	NM_019055.6	ENST00000306534.8	57.6	FALSE
CHS.10329.8	ROBO4	-	-	42.1	FALSE
CHS.10329.alt100	ROBO4		-	42.1	FALSE
CHS.10329.alt101	ROBO4		-	41.9	FALSE
CHS.10329.alt102	ROBO4	XM_011542875.1	-	42.1	FALSE
CHS.10329.alt103	ROBO4	XM_006718861.2	-	56.2	FALSE
CHS.10329.alt104	ROBO4		ENST00000532216.5	43.1	TRUE
CHS.10329.alt105	ROBO4		ENST00000525182.1	59.7	TRUE
CHS.10329.alt106	ROBO4		ENST00000533337.1	77	TRUE
CHS.10331.2	HEPACAM	XM_005271449.3	-	69.3	TRUE
CHS.10331.3	HEPACAM	XM_017017361.2	-	65.2	FALSE
CHS.10331.4	HEPACAM	NM_152722.5	ENST00000298251.5	70.2	TRUE
CHS.10331.alt100	HEPACAM	NM_152722.5	ENST00000298251.5	70.2	TRUE
CHS.10331.alt101	HEPACAM		ENST00000526273.1	83.7	TRUE
CHS.10331.alt102	HEPACAM		ENST00000528971.1	76.8	TRUE
CHS.10334.13	CCDC15	-	-	48.5	FALSE
CHS.10334.7	CCDC15	NM_025004.3	ENST00000344762.6	47.8	FALSE
CHS.10334.8	CCDC15	-	-	47.1	FALSE
CHS.10334.alt100	CCDC15		-	47.1	FALSE
CHS.10334.alt101	CCDC15		-	84.9	FALSE
CHS.10334.alt102	CCDC15	NM_025004.3	ENST00000344762.6	47.8	FALSE
CHS.10334.alt103	CCDC15		-	84.9	TRUE
CHS.10334.alt104	CCDC15		-	84.9	FALSE
CHS.10334.alt105	CCDC15		-	84.9	TRUE
CHS.10334.alt106	CCDC15		-	84.9	TRUE
CHS.10334.alt107	CCDC15		-	86.5	TRUE
CHS.10334.alt108	CCDC15		ENST00000524471.1	86.7	TRUE
CHS.10334.alt109	CCDC15		-	80.3	TRUE
CHS.10336.20	SLC37A2	-	-	75	TRUE
CHS.10336.22	SLC37A2	-	-	83.6	TRUE
CHS.10336.5	SLC37A2	NM_198277.3	ENST00000308074.4	83.2	TRUE
CHS.10336.6	SLC37A2	NM_001145290.2	ENST00000403796.7	83.1	TRUE
CHS.10336.8	SLC37A2	-	ENST00000526405.5	75.3	TRUE
CHS.10336.alt100	SLC37A2	XR_001747788.1	-	75.3	TRUE
CHS.10336.alt101	SLC37A2		-	83.6	TRUE
CHS.10336.alt102	SLC37A2		-	75.3	TRUE
CHS.10336.alt103	SLC37A2		-	83.2	TRUE
CHS.10336.alt104	SLC37A2		-	83.2	TRUE
CHS.10336.alt105	SLC37A2		-	83.2	FALSE
CHS.10336.alt106	SLC37A2		-	83.2	TRUE
CHS.10336.alt107	SLC37A2	NM_198277.3	ENST00000308074.4	83.2	TRUE
CHS.10336.alt108	SLC37A2	NM_001145290.2	ENST00000403796.7	83.1	TRUE
CHS.10336.alt109	SLC37A2		-	83.6	TRUE
CHS.10336.alt110	SLC37A2		-	79.9	TRUE
CHS.10336.alt111	SLC37A2		-	82.9	TRUE
CHS.10336.alt112	SLC37A2		ENST00000525837.5	74.7	TRUE
CHS.10336.alt113	SLC37A2		-	82.9	TRUE
CHS.10336.alt114	SLC37A2		ENST00000354617.5	78.7	TRUE
CHS.10337.1	TMEM218	NM_001258246.3	-	85.4	FALSE
CHS.10337.11	TMEM218	NM_001258243.3	ENST00000532407.5	85.4	FALSE
CHS.10337.12	TMEM218	NM_001258245.2	ENST00000529583.5	85.4	FALSE
CHS.10337.14	TMEM218	NM_001258241.2	ENST00000527271.5	85.4	FALSE
CHS.10337.15	TMEM218	NM_001258240.2	ENST00000526175.5	85.4	FALSE
CHS.10337.16	TMEM218	NR_047586.2	-	78.9	FALSE
CHS.10337.17	TMEM218	NM_001258238.2	-	85.4	FALSE
CHS.10337.18	TMEM218	NM_001258239.3	-	85.4	FALSE
CHS.10337.19	TMEM218	NM_001387234.1	-	85.4	FALSE
CHS.10337.20	TMEM218	NM_001387232.1	-	85.4	FALSE
CHS.10337.21	TMEM218	NM_001387245.1	-	85.4	FALSE
CHS.10337.22	TMEM218	NM_001387230.1	-	85.4	FALSE
CHS.10337.25	TMEM218	NM_001387231.1	-	85.4	FALSE
CHS.10337.27	TMEM218	NM_001387235.1	-	85.4	FALSE
CHS.10337.3	TMEM218	NM_001258247.2	ENST00000527766.5	85.4	FALSE
CHS.10337.31	TMEM218	NM_001387247.1	-	85.4	FALSE
CHS.10337.32	TMEM218	NM_001387248.1	-	85.4	FALSE
CHS.10337.33	TMEM218	NM_001387240.1	-	85.4	FALSE
CHS.10337.34	TMEM218	NM_001387242.1	-	85.4	FALSE
CHS.10337.35	TMEM218	NM_001387253.1	-	74.1	FALSE
CHS.10337.36	TMEM218	NM_001387250.1	-	74.1	FALSE
CHS.10337.38	TMEM218	NR_170602.1	-	78.9	FALSE
CHS.10337.39	TMEM218	NM_001387236.1	-	85.4	FALSE
CHS.10337.4	TMEM218	NR_047592.2	-	78.9	FALSE
CHS.10337.40	TMEM218	NM_001387239.1	-	85.4	FALSE
CHS.10337.41	TMEM218	NM_001387241.1	-	85.4	FALSE
CHS.10337.42	TMEM218	NM_001387237.1	-	85.4	FALSE
CHS.10337.43	TMEM218	NM_001387254.1	-	74.1	FALSE
CHS.10337.44	TMEM218	NM_001387233.1	-	85.4	FALSE
CHS.10337.45	TMEM218	NM_001387251.1	-	74.1	FALSE
CHS.10337.46	TMEM218	NM_001387252.1	-	74.1	FALSE
CHS.10337.47	TMEM218	NR_170611.1	-	78.9	FALSE
CHS.10337.48	TMEM218	NM_001387255.1	-	67.9	FALSE
CHS.10337.49	TMEM218	NM_001387238.1	-	85.4	FALSE
CHS.10337.5	TMEM218	NM_001258244.2	ENST00000682305.1	85.4	FALSE
CHS.10337.50	TMEM218	-	-	85.4	FALSE
CHS.10337.6	TMEM218	NR_047590.2	ENST00000529609.5	78.9	FALSE
CHS.10337.68	TMEM218	NM_001387246.1	-	85.4	FALSE
CHS.10337.7	TMEM218	NR_047588.2	ENST00000532156.5	78.9	FALSE
CHS.10337.70	TMEM218	NM_001387258.1	-	67.9	FALSE
CHS.10337.71	TMEM218	NM_001387257.1	-	67.9	FALSE
CHS.10337.74	TMEM218	NM_001387244.1	-	85.4	FALSE
CHS.10337.75	TMEM218	NM_001387259.1	-	67.9	FALSE
CHS.10337.77	TMEM218	NM_001387249.1	-	66.7	FALSE
CHS.10337.78	TMEM218	NM_001387256.1	-	67.9	FALSE
CHS.10337.8	TMEM218	NM_001258242.3	ENST00000531909.5	85.4	FALSE
CHS.10337.9	TMEM218	NM_001080546.3	ENST00000279968.8	85.4	FALSE
CHS.10337.alt100	TMEM218	NR_047586.2	-	78.9	FALSE
CHS.10337.alt101	TMEM218	NM_001387231.1	-	68.7	FALSE
CHS.10337.alt102	TMEM218	NR_047592.2	-	78.9	FALSE
CHS.10337.alt103	TMEM218	NM_001258244.2	ENST00000682305.1	85.4	FALSE
CHS.10337.alt104	TMEM218	NR_047590.2	ENST00000529609.5	78.9	FALSE
CHS.10337.alt105	TMEM218	NR_047588.2	ENST00000532156.5	67.9	FALSE
CHS.10337.alt106	TMEM218	NR_170602.1	-	78.9	FALSE
CHS.10337.alt107	TMEM218	NR_170611.1	-	78.9	FALSE
CHS.10337.alt108	TMEM218	NM_001387247.1	-	68.7	FALSE
CHS.10337.alt109	TMEM218	NM_001258246.3	-	68.7	FALSE
CHS.10337.alt110	TMEM218	NM_001258243.3	ENST00000532407.5	68.7	FALSE
CHS.10337.alt111	TMEM218	NM_001258239.3	-	68.7	FALSE
CHS.10337.alt112	TMEM218	NM_001258242.3	ENST00000531909.5	68.7	FALSE
CHS.10337.alt113	TMEM218	XM_024448385.1	-	66.1	FALSE
CHS.10337.alt114	TMEM218	XM_024448384.1	-	66.1	FALSE
CHS.10337.alt115	TMEM218	XM_024448388.1	-	66.1	FALSE
CHS.10337.alt116	TMEM218	XM_024448386.1	-	66.1	FALSE
CHS.10337.alt117	TMEM218	XM_024448387.1	-	66.1	FALSE
CHS.10337.alt118	TMEM218	XM_006718780.3	-	68.7	FALSE
CHS.10337.alt119	TMEM218		ENST00000527257.1	85.1	TRUE
CHS.10337.alt120	TMEM218		ENST00000524373.5	74	FALSE
CHS.10338.10	PKNOX2	NM_001382327.1	-	54.8	TRUE
CHS.10338.12	PKNOX2	NR_168083.1	-	53.8	TRUE
CHS.10338.36	PKNOX2	NM_001382325.1	-	54.8	TRUE
CHS.10338.37	PKNOX2	NM_001382339.1	-	57.9	TRUE
CHS.10338.38	PKNOX2	NM_001382335.1	-	59.9	TRUE
CHS.10338.39	PKNOX2	NR_168084.1	-	53.8	TRUE
CHS.10338.4	PKNOX2	NM_001382323.2	ENST00000298282.14	54.8	TRUE
CHS.10338.40	PKNOX2	NM_001382331.1	-	57.2	FALSE
CHS.10338.41	PKNOX2	NR_168081.1	-	53.8	FALSE
CHS.10338.42	PKNOX2	NR_168078.1	-	65.6	FALSE
CHS.10338.43	PKNOX2	NM_001382341.1	-	62.7	TRUE
CHS.10338.44	PKNOX2	NM_001382328.1	-	54.8	FALSE
CHS.10338.45	PKNOX2	NM_001382336.1	-	60.9	TRUE
CHS.10338.46	PKNOX2	NR_168079.1	-	64.2	TRUE
CHS.10338.47	PKNOX2	NM_001382326.1	-	54.8	FALSE
CHS.10338.48	PKNOX2	NR_168077.1	-	55.3	TRUE
CHS.10338.49	PKNOX2	NM_001382337.1	-	60.9	TRUE
CHS.10338.5	PKNOX2	NM_001382332.1	ENST00000530517.5	57.2	TRUE
CHS.10338.50	PKNOX2	NM_001382340.1	-	55.4	TRUE
CHS.10338.51	PKNOX2	NM_001382338.1	-	60.9	TRUE
CHS.10338.52	PKNOX2	NM_001382329.1	-	57.2	TRUE
CHS.10338.56	PKNOX2	NR_168082.1	-	64.2	FALSE
CHS.10338.57	PKNOX2	NR_168080.1	-	65.3	FALSE
CHS.10338.58	PKNOX2	NM_001382333.1	-	57.2	FALSE
CHS.10338.6	PKNOX2	NR_168076.1	-	53.8	TRUE
CHS.10338.7	PKNOX2	NM_001382324.1	-	54.8	FALSE
CHS.10338.8	PKNOX2	NM_001382330.1	ENST00000531116.5	57.2	TRUE
CHS.10338.9	PKNOX2	NM_001382334.1	-	59.9	TRUE
CHS.10338.alt100	PKNOX2		-	55.3	TRUE
CHS.10338.alt101	PKNOX2		-	71	TRUE
CHS.10338.alt102	PKNOX2		-	53.8	TRUE
CHS.10338.alt103	PKNOX2		ENST00000559662.5	63.6	TRUE
CHS.10338.alt104	PKNOX2	NR_168083.1	-	53.8	TRUE
CHS.10338.alt105	PKNOX2	NM_001382323.2	ENST00000298282.14	54.8	TRUE
CHS.10338.alt106	PKNOX2	NR_168076.1	-	53.8	TRUE
CHS.10338.alt107	PKNOX2	NR_168079.1	-	64.2	TRUE
CHS.10338.alt108	PKNOX2	NR_168078.1	-	65.6	FALSE
CHS.10338.alt109	PKNOX2	NR_168081.1	-	53.8	FALSE
CHS.10338.alt110	PKNOX2	NR_168084.1	-	53.8	TRUE
CHS.10338.alt111	PKNOX2	NR_168077.1	-	55.3	TRUE
CHS.10338.alt112	PKNOX2		ENST00000532623.5	55.4	TRUE
CHS.10338.alt113	PKNOX2		-	54.8	FALSE
CHS.10338.alt114	PKNOX2		-	55.1	TRUE
CHS.10338.alt115	PKNOX2		-	56.2	TRUE
CHS.10343.18	FEZ1	NM_022549.4	ENST00000366139.3	67.8	TRUE
CHS.10343.2	FEZ1	NM_005103.5	ENST00000278919.8	66.5	TRUE
CHS.10343.alt100	FEZ1	NM_005103.5	ENST00000278919.8	66.5	TRUE
CHS.10343.alt101	FEZ1		ENST00000648911.1	66.5	FALSE
CHS.10343.alt102	FEZ1		-	92.3	FALSE
CHS.10343.alt103	FEZ1	XM_005271734.2	-	66.5	TRUE
CHS.10343.alt104	FEZ1	XM_005271735.2	-	66.5	TRUE
CHS.10343.alt105	FEZ1		ENST00000524427.5	79	TRUE
CHS.10343.alt106	FEZ1		ENST00000530096.1	80.1	TRUE
CHS.10343.alt107	FEZ1		ENST00000392709.8	63.6	TRUE
CHS.10343.alt108	FEZ1		ENST00000532981.1	65	TRUE
CHS.10343.alt109	FEZ1		ENST00000524435.1	67.8	TRUE
CHS.10343.alt110	FEZ1		ENST00000527534.1	66	TRUE
CHS.10346.1	EI24	XM_011543070.2	ENST00000527235.6	65.2	TRUE
CHS.10346.10	EI24	XM_011543069.3	-	82.3	FALSE
CHS.10346.11	EI24	NM_001330419.2	-	65.2	FALSE
CHS.10346.3	EI24	NM_004879.5	ENST00000278903.11	82.3	TRUE
CHS.10346.4	EI24	NM_001290135.2	ENST00000534546.5	81.6	TRUE
CHS.10346.5	EI24	NR_110770.2	ENST00000531636.5	75.6	FALSE
CHS.10346.6	EI24	NR_110769.2	ENST00000615917.4	75.6	TRUE
CHS.10346.alt100	EI24		-	67.8	FALSE
CHS.10346.alt101	EI24		-	65.8	FALSE
CHS.10346.alt102	EI24		ENST00000618552.4	75.6	FALSE
CHS.10346.alt103	EI24	NR_110769.2	ENST00000615917.4	75.6	TRUE
CHS.10346.alt104	EI24		-	67.9	FALSE
[truncated: 235,276 more rows]
