# Supplementary material for: Structure-guided isoform identification for the human transcriptome
Source: eLife. 2022 Dec 15;11:e82556. doi: 10.7554/eLife.82556 (PMC9812405; doi:10.7554/eLife.82556)
Supplement: Supplementary file 2. — Folding scores and additional data for all Comprehensive Human Expressed SequenceS (CHESS) transcripts that match genes in the MANE v1.0 dataset, limited to protein sequences under 1000aa in length. Transcripts must overlap the annotated CDS of the MANE transcript to be included. Columns include: CHESS_ID_isoform, the CHESS identifier of the alternate isoform transcript; CHESS_ID_MANE, the CHESS identifier of the MANE transcript at the same locus; gene, the gene name; aa_length_isoform, the amino acid length of the alternate isoform’s CDS; aa_length_MANE, the amino acid length of the MANE transcript’s CDS; length_ratio, the ratio of the alternate isoform length to the MANE isoform length; pLDDT_isoform, the predicted folding score of the alternate isoform; pLDDT_MANE, the predicted folding score of the MANE isoform; pLDDT_ratio, the ratio of the alternate isoform folding score to the MANE isoform folding score; GTEx_samples_observed_isoform, the total number of GTEx samples where the alternate isoform was observed at least once; GTEx_samples_observed_MANE, the total number of GTEx samples where the MANE isoform was observed at least once; GTEx_top_tissue_name_isoform, the name of the tissue in which the alternate isoform was observed in the highest number of samples; GTEx_top_tissue_name_MANE, the name of the tissue in which the MANE isoform was observed in the highest number of samples; GTEx_top_tissue_TPM_isoform, the average TPM of the alternate isoform in the named tissue; GTEx_top_tissue_TPM_MANE, the observed transcripts per million (TPM) of the MANE isoform in the named tissue; introns_conserved_in_mouse_isoform, an indicator of whether introns are conserved between the alternate human isoform and any annotated isoform in the GRCm38 mouse reference genome; introns_conserved_in_mouse_MANE, an indicator of whether introns are conserved between the MANE human isoform and any annotated isoform in the GRCm38 mouse reference genome. [file elife-82556-supp2.csv]

CHESS_ID_isoform	CHESS_ID_MANE	gene	aa_length_isoform	aa_length_MANE	length_ratio	pLDDT_isoform	pLDDT_MANE	pLDDT_ratio	GTEx_samples_observed_isoform	GTEx_samples_observed_MANE	GTEx_top_tissue_name_isoform	GTEx_top_tissue_name_MANE	GTEx_top_tissue_TPM_isoform	GTEx_top_tissue_TPM_MANE	introns_conserved_in_mouse_isoform	introns_conserved_in_mouse_MANE
CHS.10000.1	CHS.10000.4	NCAM1	761	858	0.8869	85.1	81.5	1.0442	980	5156	Heart	Uterus	47.48527281	26.98797844	TRUE	TRUE
CHS.10000.10	CHS.10000.4	NCAM1	725	858	0.845	87.9	81.5	1.0785	939	5156	Nerve	Uterus	25.16154526	26.98797844	TRUE	TRUE
CHS.10000.2	CHS.10000.4	NCAM1	726	858	0.8462	87.5	81.5	1.0736	6098	5156	Brain	Uterus	35.07639669	26.98797844	TRUE	TRUE
CHS.10000.3	CHS.10000.4	NCAM1	884	858	1.0303	79.5	81.5	0.9755	1295	5156	Brain	Uterus	22.03239771	26.98797844	TRUE	TRUE
CHS.10000.38	CHS.10000.4	NCAM1	858	858	1	81.3	81.5	0.9975	75	5156	Brain	Uterus	8.98210375	26.98797844	TRUE	TRUE
CHS.10000.40	CHS.10000.4	NCAM1	736	858	0.8578	86.9	81.5	1.0663	309	5156	Pituitary	Uterus	15.9946	26.98797844	TRUE	TRUE
CHS.10000.42	CHS.10000.4	NCAM1	727	858	0.8473	87.4	81.5	1.0724	140	5156	Cervix_Uteri	Uterus	7.07598	26.98797844	TRUE	TRUE
CHS.10000.43	CHS.10000.4	NCAM1	771	858	0.8986	84.9	81.5	1.0417	633	5156	Heart	Uterus	17.90623253	26.98797844	TRUE	TRUE
CHS.10000.44	CHS.10000.4	NCAM1	762	858	0.8881	85.2	81.5	1.0454	5	5156	Heart	Uterus	4.538756667	26.98797844	TRUE	TRUE
CHS.10000.45	CHS.10000.4	NCAM1	760	858	0.8858	84.9	81.5	1.0417	10	5156	Blood_Vessel	Uterus	2.92659	26.98797844	TRUE	TRUE
CHS.10000.46	CHS.10000.4	NCAM1	735	858	0.8566	87.2	81.5	1.0699	711	5156	Brain	Uterus	16.01604698	26.98797844	TRUE	TRUE
CHS.10000.49	CHS.10000.4	NCAM1	623	858	0.7261	88.3	81.5	1.0834	123	5156	Brain	Uterus	6.412362212	26.98797844	TRUE	TRUE
CHS.10000.5	CHS.10000.4	NCAM1	848	858	0.9883	82	81.5	1.0061	6174	5156	Uterus	Uterus	64.01141684	26.98797844	TRUE	TRUE
CHS.10000.51	CHS.10000.4	NCAM1	733	858	0.8543	81.3	81.5	0.9975	20	5156	Testis	Uterus	1.20211585	26.98797844	TRUE	TRUE
CHS.10000.57	CHS.10000.4	NCAM1	883	858	1.0291	79.4	81.5	0.9742	2	5156	Breast	Uterus	0.772013	26.98797844	FALSE	TRUE
CHS.10000.58	CHS.10000.4	NCAM1	892	858	1.0396	79.2	81.5	0.9718	15	5156	Muscle	Uterus	1.4076476	26.98797844	TRUE	TRUE
CHS.10000.59	CHS.10000.4	NCAM1	862	858	1.0047	81.1	81.5	0.9951	18	5156	Brain	Uterus	14.60656333	26.98797844	TRUE	TRUE
CHS.10000.6	CHS.10000.4	NCAM1	847	858	0.9872	81.7	81.5	1.0025	533	5156	Brain	Uterus	35.21351022	26.98797844	TRUE	TRUE
CHS.10000.61	CHS.10000.4	NCAM1	882	858	1.028	79.7	81.5	0.9779	1	5156	Salivary_Gland	Uterus	2.04056	26.98797844	TRUE	TRUE
CHS.10000.63	CHS.10000.4	NCAM1	852	858	0.993	81.2	81.5	0.9963	5	5156	Brain	Uterus	11.07555	26.98797844	TRUE	TRUE
CHS.10000.65	CHS.10000.4	NCAM1	850	858	0.9907	81.3	81.5	0.9975	0	5156	-	Uterus	0	26.98797844	TRUE	TRUE
CHS.10000.66	CHS.10000.4	NCAM1	831	858	0.9685	63.7	81.5	0.7816	0	5156	-	Uterus	0	26.98797844	TRUE	TRUE
CHS.10000.67	CHS.10000.4	NCAM1	559	858	0.6515	79.5	81.5	0.9755	0	5156	-	Uterus	0	26.98797844	TRUE	TRUE
CHS.10000.68	CHS.10000.4	NCAM1	796	858	0.9277	82.8	81.5	1.016	0	5156	-	Uterus	0	26.98797844	FALSE	TRUE
CHS.10000.69	CHS.10000.4	NCAM1	770	858	0.8974	84.6	81.5	1.038	174	5156	Muscle	Uterus	3.650229651	26.98797844	TRUE	TRUE
CHS.10000.70	CHS.10000.4	NCAM1	756	858	0.8811	85.1	81.5	1.0442	0	5156	-	Uterus	0	26.98797844	TRUE	TRUE
CHS.10000.71	CHS.10000.4	NCAM1	740	858	0.8625	86.3	81.5	1.0589	252	5156	Pituitary	Uterus	11.052	26.98797844	TRUE	TRUE
CHS.10000.72	CHS.10000.4	NCAM1	746	858	0.8695	85.3	81.5	1.0466	1	5156	Muscle	Uterus	0.646485	26.98797844	TRUE	TRUE
CHS.10000.73	CHS.10000.4	NCAM1	730	858	0.8508	85.8	81.5	1.0528	121	5156	Brain	Uterus	9.7608387	26.98797844	TRUE	TRUE
CHS.10000.74	CHS.10000.4	NCAM1	706	858	0.8228	88.1	81.5	1.081	7	5156	Esophagus	Uterus	2.6987324	26.98797844	FALSE	TRUE
CHS.10000.75	CHS.10000.4	NCAM1	700	858	0.8159	86	81.5	1.0552	0	5156	-	Uterus	0	26.98797844	TRUE	TRUE
CHS.10000.76	CHS.10000.4	NCAM1	472	858	0.5501	84.4	81.5	1.0356	0	5156	-	Uterus	0	26.98797844	TRUE	TRUE
CHS.10000.77	CHS.10000.4	NCAM1	437	858	0.5093	88.3	81.5	1.0834	0	5156	-	Uterus	0	26.98797844	TRUE	TRUE
CHS.10000.9	CHS.10000.4	NCAM1	857	858	0.9988	81.2	81.5	0.9963	132	5156	Brain	Uterus	32.0656519	26.98797844	TRUE	TRUE
CHS.10003.1	CHS.10003.3	TTC12	711	705	1.0085	87.8	90.2	0.9734	0	8131	-	Testis	0	12.41259078	FALSE	TRUE
CHS.10003.10	CHS.10003.3	TTC12	705	705	1	90.2	90.2	1	128	8131	Testis	Testis	12.20600545	12.41259078	TRUE	TRUE
CHS.10003.2	CHS.10003.3	TTC12	628	705	0.8908	87.5	90.2	0.9701	4	8131	Spleen	Testis	1.96093	12.41259078	TRUE	TRUE
CHS.10003.4	CHS.10003.3	TTC12	777	705	1.1021	82.9	90.2	0.9191	29	8131	Nerve	Testis	3.00336	12.41259078	TRUE	TRUE
CHS.10003.49	CHS.10003.3	TTC12	680	705	0.9645	90.3	90.2	1.0011	12	8131	Adipose_Tissue	Testis	5.240876667	12.41259078	TRUE	TRUE
CHS.10003.5	CHS.10003.3	TTC12	774	705	1.0979	83.1	90.2	0.9213	252	8131	Testis	Testis	5.431923333	12.41259078	TRUE	TRUE
CHS.10003.50	CHS.10003.3	TTC12	753	705	1.0681	84.6	90.2	0.9379	1143	8131	Cervix_Uteri	Testis	4.4895	12.41259078	FALSE	TRUE
CHS.10003.52	CHS.10003.3	TTC12	732	705	1.0383	86.4	90.2	0.9579	4892	8131	Testis	Testis	4.385736212	12.41259078	FALSE	TRUE
CHS.10003.6	CHS.10003.3	TTC12	753	705	1.0681	84.4	90.2	0.9357	4	8131	Salivary_Gland	Testis	2.32857	12.41259078	TRUE	TRUE
CHS.10003.61	CHS.10003.3	TTC12	442	705	0.627	84.3	90.2	0.9346	0	8131	-	Testis	0	12.41259078	FALSE	TRUE
CHS.10003.62	CHS.10003.3	TTC12	555	705	0.7872	92.8	90.2	1.0288	0	8131	-	Testis	0	12.41259078	FALSE	TRUE
CHS.10003.63	CHS.10003.3	TTC12	706	705	1.0014	87.1	90.2	0.9656	0	8131	-	Testis	0	12.41259078	FALSE	TRUE
CHS.10003.7	CHS.10003.3	TTC12	755	705	1.0709	84.4	90.2	0.9357	1	8131	Stomach	Testis	0.511875	12.41259078	TRUE	TRUE
CHS.10003.9	CHS.10003.3	TTC12	705	705	1	90.2	90.2	1	128	8131	Testis	Testis	12.20600545	12.41259078	TRUE	TRUE
CHS.10004.1	CHS.10004.4	ANKK1	776	765	1.0144	81.4	82	0.9927	16	1148	Nerve	Cervix_Uteri	1.29906	3.324445	TRUE	TRUE
CHS.10004.12	CHS.10004.4	ANKK1	691	765	0.9033	82.7	82	1.0085	389	1148	Fallopian_Tube	Cervix_Uteri	2.457503333	3.324445	FALSE	TRUE
CHS.10004.13	CHS.10004.4	ANKK1	596	765	0.7791	82.1	82	1.0012	142	1148	Thyroid	Cervix_Uteri	2.123785667	3.324445	FALSE	TRUE
CHS.10004.2	CHS.10004.4	ANKK1	775	765	1.0131	80.7	82	0.9841	93	1148	Ovary	Cervix_Uteri	1.73572	3.324445	TRUE	TRUE
CHS.10004.3	CHS.10004.4	ANKK1	766	765	1.0013	81.4	82	0.9927	29	1148	Breast	Cervix_Uteri	1.53821475	3.324445	TRUE	TRUE
CHS.10004.5	CHS.10004.4	ANKK1	702	765	0.9176	83	82	1.0122	4	1148	Skin	Cervix_Uteri	0.803211667	3.324445	TRUE	TRUE
CHS.10005.10	CHS.10005.4	DRD2	386	443	0.8713	70.4	68.8	1.0233	1	1200	Adrenal_Gland	Pituitary	0.523745	62.4952715	FALSE	FALSE
CHS.10005.19	CHS.10005.4	DRD2	443	443	1	68.8	68.8	1	281	1200	Pituitary	Pituitary	7.5189075	62.4952715	FALSE	FALSE
CHS.10005.3	CHS.10005.4	DRD2	414	443	0.9345	73.4	68.8	1.0669	962	1200	Pituitary	Pituitary	19.53906379	62.4952715	FALSE	FALSE
CHS.10008.10	CHS.10008.9	TMPRSS5	448	457	0.9803	79.3	79	1.0038	1729	2006	Nerve	Nerve	17.59648026	25.0883269	FALSE	FALSE
CHS.10008.27	CHS.10008.9	TMPRSS5	242	457	0.5295	65	79	0.8228	297	2006	Nerve	Nerve	25.84845899	25.0883269	TRUE	FALSE
CHS.10008.4	CHS.10008.9	TMPRSS5	147	457	0.3217	84	79	1.0633	1234	2006	Nerve	Nerve	1.362986192	25.0883269	FALSE	FALSE
CHS.10008.5	CHS.10008.9	TMPRSS5	198	457	0.4333	90.9	79	1.1506	1303	2006	Nerve	Nerve	1.684730766	25.0883269	FALSE	FALSE
CHS.10008.6	CHS.10008.9	TMPRSS5	344	457	0.7527	69.3	79	0.8772	979	2006	Nerve	Nerve	0.615504216	25.0883269	FALSE	FALSE
CHS.10008.7	CHS.10008.9	TMPRSS5	413	457	0.9037	83.1	79	1.0519	1586	2006	Nerve	Nerve	5.699639743	25.0883269	FALSE	FALSE
CHS.10008.8	CHS.10008.9	TMPRSS5	388	457	0.849	68.3	79	0.8646	1109	2006	Thyroid	Nerve	0.809187	25.0883269	FALSE	FALSE
CHS.10009.1	CHS.10009.3	ZW10	715	779	0.9178	77.6	77.3	1.0039	247	9040	Blood_Vessel	Bone_Marrow	1.557812937	20.57028119	TRUE	TRUE
CHS.10009.2	CHS.10009.3	ZW10	559	779	0.7176	84.3	77.3	1.0906	3712	9040	Bladder	Bone_Marrow	4.394308571	20.57028119	TRUE	TRUE
CHS.10009.7	CHS.10009.3	ZW10	672	779	0.8626	77	77.3	0.9961	137	9040	Thyroid	Bone_Marrow	1.657447333	20.57028119	TRUE	TRUE
CHS.1001.1	CHS.1001.2	GMEB1	573	563	1.0178	53.2	54	0.9852	8083	8461	Bone_Marrow	Spleen	4.0585047	4.317337312	TRUE	TRUE
CHS.1001.3	CHS.1001.2	GMEB1	563	563	1	54	54	1	5235	8461	Bone_Marrow	Spleen	1.804447237	4.317337312	TRUE	TRUE
CHS.1001.4	CHS.1001.2	GMEB1	573	563	1.0178	53.2	54	0.9852	8083	8461	Bone_Marrow	Spleen	4.0585047	4.317337312	TRUE	TRUE
CHS.10013.13	CHS.10013.2	HTR3B	207	441	0.4694	66.8	82.5	0.8097	144	52	Skin	Testis	1.98707	0.514986	FALSE	TRUE
CHS.10013.4	CHS.10013.2	HTR3B	430	441	0.9751	82	82.5	0.9939	212	52	Pituitary	Testis	2.56557	0.514986	TRUE	TRUE
CHS.10013.5	CHS.10013.2	HTR3B	235	441	0.5329	84.7	82.5	1.0267	48	52	Brain	Testis	3.031531915	0.514986	TRUE	TRUE
CHS.10014.1	CHS.10014.2	HTR3A	510	478	1.0669	78.6	81.6	0.9632	290	860	Salivary_Gland	Salivary_Gland	3.910682929	8.986058972	TRUE	TRUE
CHS.10014.3	CHS.10014.2	HTR3A	222	478	0.4644	67.7	81.6	0.8297	150	860	Bladder	Salivary_Gland	0.917074	8.986058972	TRUE	TRUE
CHS.10014.4	CHS.10014.2	HTR3A	463	478	0.9686	81.7	81.6	1.0012	239	860	Thyroid	Salivary_Gland	3.353445	8.986058972	TRUE	TRUE
CHS.10019.11	CHS.10019.16	NNMT	264	264	1	95	95	1	1915	9683	Breast	Liver	90.57551636	918.5992188	FALSE	TRUE
CHS.10019.14	CHS.10019.16	NNMT	264	264	1	95	95	1	1915	9683	Breast	Liver	90.57551636	918.5992188	FALSE	TRUE
CHS.10019.23	CHS.10019.16	NNMT	264	264	1	95	95	1	1705	9683	Liver	Liver	174.107	918.5992188	FALSE	TRUE
CHS.10019.25	CHS.10019.16	NNMT	69	264	0.2614	92.3	95	0.9716	1568	9683	Adipose_Tissue	Liver	22.80781667	918.5992188	FALSE	TRUE
CHS.10019.4	CHS.10019.16	NNMT	264	264	1	95	95	1	1915	9683	Breast	Liver	90.57551636	918.5992188	TRUE	TRUE
CHS.1002.1	CHS.1002.5	YTHDF2	579	579	1	53.9	53.9	1	651	9783	Prostate	Bone_Marrow	1.4404	75.4766049	TRUE	TRUE
CHS.1002.8	CHS.1002.5	YTHDF2	529	579	0.9136	55.9	53.9	1.0371	5874	9783	Bone_Marrow	Bone_Marrow	19.627998	75.4766049	TRUE	TRUE
CHS.10020.12	CHS.10020.9	ZBTB16	673	673	1	55.2	55.2	1	5544	9284	Pituitary	Blood_Vessel	1.410898758	104.0000965	TRUE	TRUE
CHS.10020.13	CHS.10020.9	ZBTB16	673	673	1	55.2	55.2	1	5544	9284	Pituitary	Blood_Vessel	1.410898758	104.0000965	FALSE	TRUE
CHS.10020.14	CHS.10020.9	ZBTB16	673	673	1	55.2	55.2	1	5544	9284	Pituitary	Blood_Vessel	1.410898758	104.0000965	TRUE	TRUE
CHS.10020.30	CHS.10020.9	ZBTB16	644	673	0.9569	56.4	55.2	1.0217	39	9284	Thyroid	Blood_Vessel	4.59701	104.0000965	TRUE	TRUE
CHS.10020.32	CHS.10020.9	ZBTB16	231	673	0.3432	72.8	55.2	1.3188	1553	9284	Thyroid	Blood_Vessel	3.895734317	104.0000965	TRUE	TRUE
CHS.10026.2	CHS.10026.4	C11orf71	147	123	1.1951	56.9	67	0.8493	116	9788	Testis	Testis	2.73741264	101.1925377	no_introns	TRUE
CHS.10027.10	CHS.10027.1	REXO2	89	237	0.3755	76.8	85.1	0.9025	2339	9782	Testis	Bone_Marrow	5.024719503	133.6758225	TRUE	TRUE
CHS.10027.17	CHS.10027.1	REXO2	121	237	0.5105	73.4	85.1	0.8625	1974	9782	Uterus	Bone_Marrow	3.065198125	133.6758225	TRUE	TRUE
CHS.10027.19	CHS.10027.1	REXO2	222	237	0.9367	78.9	85.1	0.9271	7	9782	Testis	Bone_Marrow	2.46892	133.6758225	TRUE	TRUE
CHS.10027.5	CHS.10027.1	REXO2	79	237	0.3333	73.5	85.1	0.8637	2032	9782	Cervix_Uteri	Bone_Marrow	12.8453	133.6758225	TRUE	TRUE
CHS.10028.3	CHS.10028.2	RBM7	266	267	0.9963	62.1	62.2	0.9984	9682	9733	Testis	Bone_Marrow	16.33348792	11.54124333	FALSE	FALSE
CHS.10028.4	CHS.10028.2	RBM7	146	267	0.5468	54.5	62.2	0.8762	5970	9733	Testis	Bone_Marrow	0.259703093	11.54124333	FALSE	FALSE
CHS.10028.5	CHS.10028.2	RBM7	146	267	0.5468	54.5	62.2	0.8762	5970	9733	Testis	Bone_Marrow	0.259703093	11.54124333	FALSE	FALSE
CHS.10028.6	CHS.10028.2	RBM7	146	267	0.5468	54.5	62.2	0.8762	5970	9733	Testis	Bone_Marrow	0.259703093	11.54124333	FALSE	FALSE
CHS.10029.11	CHS.10029.7	NXPE2	551	559	0.9857	90.1	89.1	1.0112	2	290	Colon	Salivary_Gland	3.8841835	3.444904957	TRUE	TRUE
CHS.10029.12	CHS.10029.7	NXPE2	535	559	0.9571	88.9	89.1	0.9978	75	290	Colon	Salivary_Gland	9.861341419	3.444904957	FALSE	TRUE
CHS.10029.6	CHS.10029.7	NXPE2	535	559	0.9571	88.9	89.1	0.9978	75	290	Colon	Salivary_Gland	9.861341419	3.444904957	FALSE	TRUE
CHS.10029.8	CHS.10029.7	NXPE2	385	559	0.6887	85	89.1	0.954	40	290	Colon	Salivary_Gland	1.578984688	3.444904957	FALSE	TRUE
CHS.10030.20	CHS.10030.8	NXPE1	405	547	0.7404	94.5	90.8	1.0407	347	344	Colon	Colon	22.89394709	9.7852272	FALSE	FALSE
CHS.10030.21	CHS.10030.8	NXPE1	295	547	0.5393	84.6	90.8	0.9317	100	344	Testis	Colon	3.94532541	9.7852272	FALSE	FALSE
CHS.10030.24	CHS.10030.8	NXPE1	278	547	0.5082	85.6	90.8	0.9427	101	344	Colon	Colon	26.01245667	9.7852272	FALSE	FALSE
CHS.10030.25	CHS.10030.8	NXPE1	263	547	0.4808	91.9	90.8	1.0121	60	344	Colon	Colon	13.3362615	9.7852272	FALSE	FALSE
CHS.10032.10	CHS.10032.9	NXPE4	313	544	0.5754	83.8	89.8	0.9332	36	318	Colon	Colon	10.84427625	56.23909292	FALSE	FALSE
CHS.10032.12	CHS.10032.9	NXPE4	475	544	0.8732	85.5	89.8	0.9521	12	318	Colon	Colon	2.002063	56.23909292	FALSE	FALSE
CHS.10032.13	CHS.10032.9	NXPE4	369	544	0.6783	85.2	89.8	0.9488	33	318	Colon	Colon	12.00460355	56.23909292	FALSE	FALSE
CHS.10032.8	CHS.10032.9	NXPE4	260	544	0.4779	92.6	89.8	1.0312	241	318	Colon	Colon	11.08720378	56.23909292	FALSE	FALSE
CHS.10036.10	CHS.10036.13	CADM1	443	471	0.9406	79.4	77.6	1.0232	2453	4184	Brain	Brain	9.301061895	13.25832417	TRUE	TRUE
CHS.10036.11	CHS.10036.13	CADM1	442	471	0.9384	80	77.6	1.0309	8425	4184	Thyroid	Brain	16.88807747	13.25832417	TRUE	TRUE
CHS.10036.12	CHS.10036.13	CADM1	453	471	0.9618	79.1	77.6	1.0193	6145	4184	Testis	Brain	16.40567826	13.25832417	TRUE	TRUE
CHS.10036.2	CHS.10036.13	CADM1	387	471	0.8217	85	77.6	1.0954	10	4184	Brain	Brain	2.2635109	13.25832417	TRUE	TRUE
CHS.10036.25	CHS.10036.13	CADM1	333	471	0.707	86.4	77.6	1.1134	51	4184	Brain	Brain	4.340562	13.25832417	TRUE	TRUE
CHS.10036.4	CHS.10036.13	CADM1	438	471	0.9299	80.2	77.6	1.0335	4	4184	Brain	Brain	0.826405	13.25832417	TRUE	TRUE
CHS.10036.8	CHS.10036.13	CADM1	425	471	0.9023	81	77.6	1.0438	1098	4184	Skin	Brain	11.649695	13.25832417	TRUE	TRUE
CHS.10036.9	CHS.10036.13	CADM1	414	471	0.879	82.1	77.6	1.058	4081	4184	Brain	Brain	13.36152663	13.25832417	TRUE	TRUE
CHS.1005.10	CHS.1005.49	EPB41	772	864	0.8935	60.9	59.2	1.0287	927	691	Ovary	Fallopian_Tube	9.84241	11.6784	TRUE	TRUE
CHS.1005.100	CHS.1005.49	EPB41	565	864	0.6539	70.6	59.2	1.1926	5	691	Brain	Fallopian_Tube	0.863453	11.6784	TRUE	TRUE
CHS.1005.14	CHS.1005.49	EPB41	770	864	0.8912	62.4	59.2	1.0541	1034	691	Bladder	Fallopian_Tube	8.181848	11.6784	TRUE	TRUE
CHS.1005.17	CHS.1005.49	EPB41	578	864	0.669	67.6	59.2	1.1419	30	691	Brain	Fallopian_Tube	1.222172367	11.6784	TRUE	TRUE
CHS.1005.18	CHS.1005.49	EPB41	619	864	0.7164	66.9	59.2	1.1301	4	691	Brain	Fallopian_Tube	1.5275775	11.6784	TRUE	TRUE
CHS.1005.19	CHS.1005.49	EPB41	573	864	0.6632	68	59.2	1.1486	39	691	Brain	Fallopian_Tube	1.646271256	11.6784	TRUE	TRUE
CHS.1005.2	CHS.1005.49	EPB41	641	864	0.7419	67.5	59.2	1.1402	101	691	Brain	Fallopian_Tube	3.995893333	11.6784	TRUE	TRUE
CHS.1005.20	CHS.1005.49	EPB41	524	864	0.6065	71.7	59.2	1.2111	15	691	Brain	Fallopian_Tube	1.142683067	11.6784	TRUE	TRUE
CHS.1005.22	CHS.1005.49	EPB41	542	864	0.6273	70	59.2	1.1824	616	691	Brain	Fallopian_Tube	1.970657425	11.6784	TRUE	TRUE
CHS.1005.23	CHS.1005.49	EPB41	523	864	0.6053	71.9	59.2	1.2145	11	691	Brain	Fallopian_Tube	0.796123545	11.6784	TRUE	TRUE
CHS.1005.3	CHS.1005.49	EPB41	864	864	1	59.2	59.2	1	691	691	Fallopian_Tube	Fallopian_Tube	11.6784	11.6784	TRUE	TRUE
CHS.1005.36	CHS.1005.49	EPB41	787	864	0.9109	59.4	59.2	1.0034	613	691	Brain	Fallopian_Tube	2.574719456	11.6784	TRUE	TRUE
CHS.1005.37	CHS.1005.49	EPB41	828	864	0.9583	58.2	59.2	0.9831	1	691	Brain	Fallopian_Tube	0.532317	11.6784	TRUE	TRUE
CHS.1005.38	CHS.1005.49	EPB41	782	864	0.9051	59.5	59.2	1.0051	552	691	Skin	Fallopian_Tube	2.86948	11.6784	TRUE	TRUE
CHS.1005.39	CHS.1005.49	EPB41	733	864	0.8484	61.9	59.2	1.0456	7	691	Brain	Fallopian_Tube	2.396543	11.6784	TRUE	TRUE
CHS.1005.4	CHS.1005.49	EPB41	775	864	0.897	56.6	59.2	0.9561	807	691	Nerve	Fallopian_Tube	2.92469	11.6784	TRUE	TRUE
CHS.1005.40	CHS.1005.49	EPB41	786	864	0.9097	59.5	59.2	1.0051	8	691	Brain	Fallopian_Tube	5.323165	11.6784	TRUE	TRUE
CHS.1005.41	CHS.1005.49	EPB41	781	864	0.9039	60	59.2	1.0135	3	691	Brain	Fallopian_Tube	3.31503	11.6784	TRUE	TRUE
CHS.1005.5	CHS.1005.49	EPB41	588	864	0.6806	68.4	59.2	1.1554	213	691	Brain	Fallopian_Tube	3.074374222	11.6784	TRUE	TRUE
CHS.1005.54	CHS.1005.49	EPB41	841	864	0.9734	60.3	59.2	1.0186	2065	691	Brain	Fallopian_Tube	14.68276367	11.6784	TRUE	TRUE
CHS.1005.56	CHS.1005.49	EPB41	829	864	0.9595	60.3	59.2	1.0186	188	691	Small_Intestine	Fallopian_Tube	3.0982864	11.6784	TRUE	TRUE
CHS.1005.6	CHS.1005.49	EPB41	601	864	0.6956	69.1	59.2	1.1672	7701	691	Bone_Marrow	Fallopian_Tube	120.5254206	11.6784	TRUE	TRUE
CHS.1005.69	CHS.1005.49	EPB41	720	864	0.8333	61.2	59.2	1.0338	3112	691	Brain	Fallopian_Tube	0.239620633	11.6784	TRUE	TRUE
CHS.1005.7	CHS.1005.49	EPB41	622	864	0.7199	68.4	59.2	1.1554	1515	691	Bone_Marrow	Fallopian_Tube	16.37187091	11.6784	TRUE	TRUE
CHS.1005.84	CHS.1005.49	EPB41	621	864	0.7188	68.8	59.2	1.1622	795	691	Bone_Marrow	Fallopian_Tube	16.38840222	11.6784	TRUE	TRUE
CHS.1005.9	CHS.1005.49	EPB41	639	864	0.7396	66	59.2	1.1149	1255	691	Vagina	Fallopian_Tube	15.7945	11.6784	TRUE	TRUE
CHS.1005.97	CHS.1005.49	EPB41	655	864	0.7581	66.4	59.2	1.1216	566	691	Brain	Fallopian_Tube	14.59678963	11.6784	TRUE	TRUE
CHS.10064.3	CHS.10064.4	BUD13	485	619	0.7835	62.2	56	1.1107	3044	9672	Liver	Testis	0.695080167	31.33647169	TRUE	TRUE
CHS.10066.1	CHS.10066.2	ZPR1	405	459	0.8824	80.5	79.2	1.0164	26	9764	Lung	Bone_Marrow	0.982569	22.66229314	TRUE	TRUE
CHS.10066.6	CHS.10066.2	ZPR1	280	459	0.61	79.9	79.2	1.0088	3270	9764	Testis	Bone_Marrow	12.17446937	22.66229314	FALSE	TRUE
CHS.10068.3	CHS.10068.2	APOA5	366	366	1	69.7	69.7	1	207	207	Liver	Liver	71.20187891	71.20187891	TRUE	TRUE
CHS.10068.4	CHS.10068.2	APOA5	366	366	1	69.7	69.7	1	207	207	Liver	Liver	71.20187891	71.20187891	FALSE	TRUE
CHS.1007.1	CHS.1007.2	TMEM200B	307	307	1	48.8	48.8	1	4283	4324	Uterus	Uterus	35.18326958	53.81452742	FALSE	FALSE
CHS.10070.3	CHS.10070.2	APOA4	395	396	0.9975	77.6	75.3	1.0305	32	963	Small_Intestine	Small_Intestine	87.71622414	2098.324683	TRUE	TRUE
CHS.10073.1	CHS.10073.6	APOA1	267	267	1	64.5	64.5	1	2212	3802	Liver	Liver	1223.880673	5919.424326	FALSE	TRUE
CHS.10073.16	CHS.10073.6	APOA1	267	267	1	64.5	64.5	1	480	3802	Liver	Liver	339.601	5919.424326	FALSE	TRUE
CHS.10073.2	CHS.10073.6	APOA1	267	267	1	64.5	64.5	1	2212	3802	Liver	Liver	1223.880673	5919.424326	TRUE	TRUE
CHS.10073.5	CHS.10073.6	APOA1	158	267	0.5918	68.7	64.5	1.0651	0	3802	-	Liver	0	5919.424326	TRUE	TRUE
CHS.10079.11	CHS.10079.2	PAFAH1B2	165	229	0.7205	82.9	93.7	0.8847	2	9749	Blood	Bone_Marrow	1.89089	46.03707255	TRUE	TRUE
CHS.10079.25	CHS.10079.2	PAFAH1B2	137	229	0.5983	94.2	93.7	1.0053	3148	9749	Nerve	Bone_Marrow	4.440514714	46.03707255	FALSE	TRUE
CHS.10079.3	CHS.10079.2	PAFAH1B2	181	229	0.7904	92.2	93.7	0.984	371	9749	Nerve	Bone_Marrow	2.474781643	46.03707255	TRUE	TRUE
CHS.10079.5	CHS.10079.2	PAFAH1B2	202	229	0.8821	72	93.7	0.7684	273	9749	Colon	Bone_Marrow	3.27416	46.03707255	TRUE	TRUE
CHS.10079.6	CHS.10079.2	PAFAH1B2	155	229	0.6769	87	93.7	0.9285	5293	9749	Lung	Bone_Marrow	0.613230632	46.03707255	TRUE	TRUE
CHS.10079.7	CHS.10079.2	PAFAH1B2	132	229	0.5764	94.7	93.7	1.0107	8401	9749	Lung	Bone_Marrow	0.567051375	46.03707255	TRUE	TRUE
CHS.10079.8	CHS.10079.2	PAFAH1B2	202	229	0.8821	72	93.7	0.7684	0	9749	-	Bone_Marrow	0	46.03707255	FALSE	TRUE
CHS.10079.9	CHS.10079.2	PAFAH1B2	155	229	0.6769	87	93.7	0.9285	149	9749	Testis	Bone_Marrow	3.72073	46.03707255	FALSE	TRUE
CHS.10080.23	CHS.10080.1	SIDT2	855	832	1.0276	76.4	79.9	0.9562	3	9716	Colon	Ovary	2.30705	81.082225	TRUE	TRUE
CHS.10080.24	CHS.10080.1	SIDT2	829	832	0.9964	80	79.9	1.0013	61	9716	Pituitary	Ovary	6.34876	81.082225	TRUE	TRUE
CHS.10080.6	CHS.10080.1	SIDT2	836	832	1.0048	79.4	79.9	0.9937	2066	9716	Pituitary	Ovary	16.7453367	81.082225	TRUE	TRUE
CHS.10081.1	CHS.10081.2	TAGLN	201	201	1	85.9	85.9	1	9070	9784	Blood_Vessel	Blood_Vessel	39.35153192	5855.530007	TRUE	TRUE
CHS.10083.3	CHS.10083.6	PCSK7	560	785	0.7134	82.5	80.8	1.021	7	9718	Blood	Blood_Vessel	4.132265	74.44267592	TRUE	TRUE
CHS.10083.4	CHS.10083.6	PCSK7	557	785	0.7096	82.8	80.8	1.0248	5	9718	Brain	Blood_Vessel	4.73292	74.44267592	TRUE	TRUE
CHS.10083.5	CHS.10083.6	PCSK7	597	785	0.7605	88.5	80.8	1.0953	3	9718	Blood	Blood_Vessel	1.38851	74.44267592	TRUE	TRUE
CHS.10083.7	CHS.10083.6	PCSK7	596	785	0.7592	88.5	80.8	1.0953	68	9718	Testis	Blood_Vessel	11.46743348	74.44267592	TRUE	TRUE
CHS.10085.16	CHS.10085.3	RNF214	548	703	0.7795	69.7	60	1.1617	1119	9575	Thyroid	Testis	2.080754	25.0452843	TRUE	TRUE
CHS.10085.20	CHS.10085.3	RNF214	513	703	0.7297	71.8	60	1.1967	14	9575	Lung	Testis	1.077285	25.0452843	TRUE	TRUE
CHS.10085.7	CHS.10085.3	RNF214	703	703	1	60	60	1	4500	9575	Fallopian_Tube	Testis	2.986554667	25.0452843	TRUE	TRUE
CHS.10085.8	CHS.10085.3	RNF214	548	703	0.7795	69.7	60	1.1617	3330	9575	Testis	Testis	0.585776075	25.0452843	TRUE	TRUE
CHS.10086.19	CHS.10086.8	BACE1	267	501	0.5329	88.8	83.8	1.0597	219	9123	Blood	Pancreas	5.72247	34.69945678	TRUE	TRUE
CHS.10086.3	CHS.10086.8	BACE1	376	501	0.7505	82.3	83.8	0.9821	1181	9123	Pituitary	Pancreas	2.68074	34.69945678	TRUE	TRUE
CHS.10086.4	CHS.10086.8	BACE1	401	501	0.8004	86.3	83.8	1.0298	1273	9123	Brain	Pancreas	1.629785878	34.69945678	TRUE	TRUE
CHS.10086.5	CHS.10086.8	BACE1	432	501	0.8623	78.9	83.8	0.9415	2472	9123	Spleen	Pancreas	1.079641133	34.69945678	TRUE	TRUE
CHS.10086.6	CHS.10086.8	BACE1	457	501	0.9122	80.7	83.8	0.963	2625	9123	Brain	Pancreas	1.888875661	34.69945678	TRUE	TRUE
CHS.10086.7	CHS.10086.8	BACE1	476	501	0.9501	78.2	83.8	0.9332	7966	9123	Pancreas	Pancreas	13.58594121	34.69945678	TRUE	TRUE
CHS.10087.96	CHS.10087.18	CEP164	827	1460	0.5664	72.1	61.9	1.1648	3	5000	Pituitary	Testis	1.76906	6.701477547	FALSE	FALSE
CHS.10087.97	CHS.10087.18	CEP164	893	1460	0.6116	72.3	61.9	1.168	170	5000	Lung	Testis	10.965385	6.701477547	FALSE	FALSE
CHS.10089.20	CHS.10089.9	DSCAML1	929	2053	0.4525	88.7	69.2	1.2818	1	1207	Pituitary	Pituitary	0.456454	5.928598617	FALSE	TRUE
CHS.10093.14	CHS.10093.2	FXYD2	135	66	2.0455	46	72.3	0.6362	592	5027	Kidney	Kidney	53.602071	1532.359764	FALSE	TRUE
CHS.10093.4	CHS.10093.2	FXYD2	64	66	0.9697	73.6	72.3	1.018	4195	5027	Kidney	Kidney	736.3920361	1532.359764	TRUE	TRUE
CHS.10094.12	CHS.10094.1	FXYD6	94	95	0.9895	64.8	68	0.9529	995	8957	Fallopian_Tube	Uterus	11.7775	409.6734062	TRUE	TRUE
CHS.10094.2	CHS.10094.1	FXYD6	95	95	1	68	68	1	7634	8957	Brain	Uterus	18.08199135	409.6734062	FALSE	TRUE
CHS.10094.3	CHS.10094.1	FXYD6	95	95	1	68	68	1	7634	8957	Brain	Uterus	18.08199135	409.6734062	FALSE	TRUE
CHS.10094.4	CHS.10094.1	FXYD6	95	95	1	68	68	1	7634	8957	Brain	Uterus	18.08199135	409.6734062	FALSE	TRUE
CHS.10094.6	CHS.10094.1	FXYD6	95	95	1	68	68	1	7634	8957	Brain	Uterus	18.08199135	409.6734062	TRUE	TRUE
CHS.10099.1	CHS.10099.2	TMPRSS13	532	567	0.9383	73.8	74.6	0.9893	1387	2087	Skin	Skin	4.111545476	37.64367535	TRUE	TRUE
CHS.10099.13	CHS.10099.2	TMPRSS13	477	567	0.8413	81.1	74.6	1.0871	112	2087	Skin	Skin	4.44514125	37.64367535	TRUE	TRUE
CHS.10099.16	CHS.10099.2	TMPRSS13	586	567	1.0335	73.2	74.6	0.9812	9	2087	Prostate	Skin	2.41295	37.64367535	TRUE	TRUE
CHS.10099.6	CHS.10099.2	TMPRSS13	563	567	0.9929	74.6	74.6	1	1327	2087	Skin	Skin	1.025393437	37.64367535	TRUE	TRUE
CHS.10099.8	CHS.10099.2	TMPRSS13	491	567	0.866	59.8	74.6	0.8016	2177	2087	Ovary	Skin	7.82547	37.64367535	TRUE	TRUE
CHS.101.10	CHS.101.2	ATAD3C	411	411	1	82.8	82.8	1	421	3789	Blood_Vessel	Prostate	4.23974	5.325718053	FALSE	FALSE
CHS.101.9	CHS.101.2	ATAD3C	410	411	0.9976	83	82.8	1.0024	375	3789	Thyroid	Prostate	3.603972857	5.325718053	FALSE	FALSE
CHS.1010.17	CHS.1010.2	SRSF4	371	494	0.751	48.9	53	0.9226	8081	9796	Cervix_Uteri	Bone_Marrow	33.27658182	136.9898833	FALSE	TRUE
CHS.1010.6	CHS.1010.2	SRSF4	464	494	0.9393	55.3	53	1.0434	9766	9796	Thyroid	Bone_Marrow	43.99332626	136.9898833	TRUE	TRUE
CHS.10103.1	CHS.10103.3	IL10RA	558	578	0.9654	57.7	58.1	0.9931	3681	6900	Spleen	Spleen	16.55432829	61.51618847	FALSE	TRUE
CHS.10103.2	CHS.10103.3	IL10RA	558	578	0.9654	57.7	58.1	0.9931	4551	6900	Spleen	Spleen	26.55626051	61.51618847	FALSE	TRUE
CHS.10105.3	CHS.10105.2	SMIM35	46	85	0.5412	75.8	65.9	1.1502	0	6	-	Breast	0	0.801845	TRUE	TRUE
CHS.10105.4	CHS.10105.2	SMIM35	101	85	1.1882	62.2	65.9	0.9439	0	6	-	Breast	0	0.801845	FALSE	TRUE
CHS.10105.6	CHS.10105.2	SMIM35	173	85	2.0353	57.7	65.9	0.8756	0	6	-	Breast	0	0.801845	FALSE	TRUE
CHS.10108.11	CHS.10108.1	TMPRSS4	454	437	1.0389	81.2	87.8	0.9248	2	972	Colon	Esophagus	6.88263	52.07203301	FALSE	FALSE
CHS.10108.12	CHS.10108.1	TMPRSS4	345	437	0.7895	73.2	87.8	0.8337	2	972	Lung	Esophagus	0.869926	52.07203301	FALSE	FALSE
CHS.10108.13	CHS.10108.1	TMPRSS4	494	437	1.1304	81.3	87.8	0.926	8	972	Esophagus	Esophagus	11.83705	52.07203301	FALSE	FALSE
CHS.10108.17	CHS.10108.1	TMPRSS4	492	437	1.1259	81.7	87.8	0.9305	120	972	Bladder	Esophagus	25.7718	52.07203301	FALSE	FALSE
CHS.10108.2	CHS.10108.1	TMPRSS4	432	437	0.9886	85.6	87.8	0.9749	672	972	Esophagus	Esophagus	6.765229829	52.07203301	FALSE	FALSE
CHS.10108.25	CHS.10108.1	TMPRSS4	399	437	0.913	88.5	87.8	1.008	6	972	Colon	Esophagus	1.67627	52.07203301	FALSE	FALSE
CHS.10108.3	CHS.10108.1	TMPRSS4	412	437	0.9428	90.3	87.8	1.0285	560	972	Blood	Esophagus	9.65867	52.07203301	FALSE	FALSE
CHS.10108.4	CHS.10108.1	TMPRSS4	435	437	0.9954	88.5	87.8	1.008	1433	972	Bladder	Esophagus	33.57458411	52.07203301	FALSE	FALSE
CHS.10108.5	CHS.10108.1	TMPRSS4	335	437	0.7666	84.3	87.8	0.9601	1232	972	Esophagus	Esophagus	5.064358014	52.07203301	TRUE	FALSE
CHS.10108.6	CHS.10108.1	TMPRSS4	290	437	0.6636	84.2	87.8	0.959	723	972	Esophagus	Esophagus	4.062527539	52.07203301	FALSE	FALSE
CHS.10108.7	CHS.10108.1	TMPRSS4	397	437	0.9085	88.7	87.8	1.0103	934	972	Cervix_Uteri	Esophagus	2.182405	52.07203301	FALSE	FALSE
CHS.10108.9	CHS.10108.1	TMPRSS4	489	437	1.119	79.6	87.8	0.9066	1	972	Esophagus	Esophagus	6.42207	52.07203301	FALSE	FALSE
CHS.10110.3	CHS.10110.7	SCN4B	110	228	0.4825	77.9	81.5	0.9558	1277	7122	Brain	Brain	3.863050414	35.71923346	FALSE	TRUE
CHS.10110.5	CHS.10110.7	SCN4B	118	228	0.5175	82	81.5	1.0061	7628	7122	Brain	Brain	11.36416014	35.71923346	TRUE	TRUE
CHS.10110.6	CHS.10110.7	SCN4B	94	228	0.4123	66.9	81.5	0.8209	1921	7122	Brain	Brain	3.54478536	35.71923346	TRUE	TRUE
CHS.10111.10	CHS.10111.2	SCN2B	194	215	0.9023	85.2	84.2	1.0119	88	3265	Brain	Brain	1.061339184	36.19369997	TRUE	TRUE
CHS.10112.1	CHS.10112.5	JAML	355	394	0.901	70.1	71.3	0.9832	5295	5485	Blood	Blood	40.42085383	121.3524308	FALSE	FALSE
CHS.10112.2	CHS.10112.5	JAML	305	394	0.7741	77.2	71.3	1.0827	1502	5485	Brain	Blood	2.62640108	121.3524308	FALSE	FALSE
CHS.10112.3	CHS.10112.5	JAML	384	394	0.9746	71.6	71.3	1.0042	1673	5485	Brain	Blood	4.627093706	121.3524308	FALSE	FALSE
CHS.10112.4	CHS.10112.5	JAML	355	394	0.901	70.1	71.3	0.9832	5295	5485	Blood	Blood	40.42085383	121.3524308	FALSE	FALSE
CHS.10113.2	CHS.10113.7	MPZL3	219	235	0.9319	80.7	77.8	1.0373	106	4581	Brain	Cervix_Uteri	4.42473	35.03945667	TRUE	TRUE
CHS.10113.4	CHS.10113.7	MPZL3	65	235	0.2766	70.3	77.8	0.9036	293	4581	Prostate	Cervix_Uteri	3.660755	35.03945667	TRUE	TRUE
CHS.10113.5	CHS.10113.7	MPZL3	223	235	0.9489	78.1	77.8	1.0039	1485	4581	Cervix_Uteri	Cervix_Uteri	3.79565	35.03945667	TRUE	TRUE
CHS.10113.6	CHS.10113.7	MPZL3	81	235	0.3447	61.9	77.8	0.7956	2919	4581	Cervix_Uteri	Cervix_Uteri	4.85963	35.03945667	TRUE	TRUE
CHS.10114.17	CHS.10114.3	MPZL2	215	215	1	88	88	1	8142	8142	Vagina	Vagina	13.04333977	13.04333977	FALSE	FALSE
CHS.10114.18	CHS.10114.3	MPZL2	195	215	0.907	88.5	88	1.0057	1707	8142	Vagina	Vagina	43.87705455	13.04333977	FALSE	FALSE
CHS.10118.2	CHS.10118.3	CD3D	127	171	0.7427	75.1	73.3	1.0246	2260	6025	Bone_Marrow	Bone_Marrow	9.583668911	69.2375402	TRUE	TRUE
CHS.1012.19	CHS.1012.1	MECR	297	373	0.7962	95.7	89.9	1.0645	2173	9686	Breast	Bone_Marrow	2.1279345	14.10349902	FALSE	TRUE
CHS.1012.2	CHS.1012.1	MECR	297	373	0.7962	95.7	89.9	1.0645	9344	9686	Nerve	Bone_Marrow	6.124056825	14.10349902	TRUE	TRUE
CHS.1012.20	CHS.1012.1	MECR	297	373	0.7962	95.7	89.9	1.0645	9344	9686	Nerve	Bone_Marrow	6.124056825	14.10349902	FALSE	TRUE
CHS.1012.23	CHS.1012.1	MECR	297	373	0.7962	95.7	89.9	1.0645	9344	9686	Nerve	Bone_Marrow	6.124056825	14.10349902	FALSE	TRUE
CHS.1012.24	CHS.1012.1	MECR	201	373	0.5389	95.6	89.9	1.0634	3	9686	Adipose_Tissue	Bone_Marrow	2.31699	14.10349902	FALSE	TRUE
CHS.1012.26	CHS.1012.1	MECR	297	373	0.7962	95.7	89.9	1.0645	9344	9686	Nerve	Bone_Marrow	6.124056825	14.10349902	FALSE	TRUE
CHS.1012.37	CHS.1012.1	MECR	297	373	0.7962	95.7	89.9	1.0645	9344	9686	Nerve	Bone_Marrow	6.124056825	14.10349902	TRUE	TRUE
CHS.1012.39	CHS.1012.1	MECR	408	373	1.0938	85.6	89.9	0.9522	27	9686	Skin	Bone_Marrow	2.086	14.10349902	TRUE	TRUE
CHS.1012.4	CHS.1012.1	MECR	401	373	1.0751	85.3	89.9	0.9488	1097	9686	Thyroid	Bone_Marrow	1.591698883	14.10349902	TRUE	TRUE
CHS.1012.43	CHS.1012.1	MECR	373	373	1	89.9	89.9	1	193	9686	Adipose_Tissue	Bone_Marrow	4.020053667	14.10349902	FALSE	TRUE
CHS.1012.44	CHS.1012.1	MECR	323	373	0.866	94.6	89.9	1.0523	12	9686	Adipose_Tissue	Bone_Marrow	1.68607	14.10349902	TRUE	TRUE
CHS.1012.59	CHS.1012.1	MECR	120	373	0.3217	95.1	89.9	1.0578	0	9686	-	Bone_Marrow	0	14.10349902	FALSE	TRUE
CHS.1012.7	CHS.1012.1	MECR	364	373	0.9759	75.5	89.9	0.8398	3	9686	Skin	Bone_Marrow	0.85669	14.10349902	TRUE	TRUE
CHS.10120.1	CHS.10120.3	CD3G	186	182	1.022	70.5	71.6	0.9846	2598	1998	Small_Intestine	Spleen	0.611573295	7.793700932	FALSE	FALSE
CHS.10121.22	CHS.10121.2	UBE4A	701	1066	0.6576	85.6	87.4	0.9794	69	9438	Vagina	Bone_Marrow	5.2937	31.45231667	FALSE	TRUE
CHS.10121.24	CHS.10121.2	UBE4A	707	1066	0.6632	83.8	87.4	0.9588	241	9438	Brain	Bone_Marrow	3.489037297	31.45231667	FALSE	TRUE
CHS.10121.25	CHS.10121.2	UBE4A	670	1066	0.6285	88.1	87.4	1.008	2234	9438	Brain	Bone_Marrow	21.71999879	31.45231667	TRUE	TRUE
CHS.10123.13	CHS.10123.2	ATP5MG	76	103	0.7379	77.7	63	1.2333	67	9787	Blood	Bone_Marrow	7.96849	198.530598	TRUE	TRUE
CHS.10123.15	CHS.10123.2	ATP5MG	75	103	0.7282	86.6	63	1.3746	17	9787	Thyroid	Bone_Marrow	18.49244	198.530598	TRUE	TRUE
CHS.10123.18	CHS.10123.2	ATP5MG	73	103	0.7087	65.5	63	1.0397	2115	9787	Bone_Marrow	Bone_Marrow	20.15524636	198.530598	TRUE	TRUE
CHS.10130.4	CHS.10130.1	TTC36	130	189	0.6878	86.6	85.4	1.0141	128	1630	Liver	Liver	2.42198273	49.10977621	TRUE	TRUE
CHS.10130.5	CHS.10130.1	TTC36	130	189	0.6878	86.6	85.4	1.0141	128	1630	Liver	Liver	2.42198273	49.10977621	FALSE	TRUE
CHS.10130.7	CHS.10130.1	TTC36	97	189	0.5132	82.6	85.4	0.9672	13	1630	Pancreas	Liver	1.03684	49.10977621	FALSE	TRUE
CHS.10131.10	CHS.10131.1	TMEM25	366	366	1	63.1	63.1	1	2590	9086	Pituitary	Brain	12.08889909	11.26160509	FALSE	FALSE
CHS.10131.2	CHS.10131.1	TMEM25	381	366	1.041	61.4	63.1	0.9731	6526	9086	Cervix_Uteri	Brain	0.186451455	11.26160509	FALSE	FALSE
CHS.10131.3	CHS.10131.1	TMEM25	322	366	0.8798	60.6	63.1	0.9604	8996	9086	Blood_Vessel	Brain	3.129272629	11.26160509	FALSE	FALSE
CHS.10131.31	CHS.10131.1	TMEM25	322	366	0.8798	60.6	63.1	0.9604	8996	9086	Blood_Vessel	Brain	3.129272629	11.26160509	FALSE	FALSE
CHS.10131.4	CHS.10131.1	TMEM25	269	366	0.735	65.6	63.1	1.0396	1	9086	Blood	Brain	1.00331	11.26160509	FALSE	FALSE
CHS.10131.45	CHS.10131.1	TMEM25	282	366	0.7705	72.2	63.1	1.1442	6	9086	Colon	Brain	0.549516	11.26160509	TRUE	FALSE
CHS.10131.49	CHS.10131.1	TMEM25	131	366	0.3579	82.2	63.1	1.3027	18	9086	Bone_Marrow	Brain	2.57529	11.26160509	TRUE	FALSE
CHS.10131.5	CHS.10131.1	TMEM25	218	366	0.5956	47.8	63.1	0.7575	1549	9086	Muscle	Brain	0.242181412	11.26160509	FALSE	FALSE
CHS.10131.6	CHS.10131.1	TMEM25	322	366	0.8798	60.6	63.1	0.9604	8996	9086	Blood_Vessel	Brain	3.129272629	11.26160509	FALSE	FALSE
CHS.10131.8	CHS.10131.1	TMEM25	351	366	0.959	64.6	63.1	1.0238	9074	9086	Blood_Vessel	Brain	7.432186602	11.26160509	FALSE	FALSE
CHS.10131.9	CHS.10131.1	TMEM25	306	366	0.8361	62.8	63.1	0.9952	8326	9086	Blood_Vessel	Brain	1.171583523	11.26160509	FALSE	FALSE
CHS.10132.17	CHS.10132.3	IFT46	304	304	1	70.3	70.3	1	2150	9661	Pituitary	Fallopian_Tube	5.757079072	32.61622857	FALSE	TRUE
CHS.10132.4	CHS.10132.3	IFT46	355	304	1.1678	64.5	70.3	0.9175	9358	9661	Fallopian_Tube	Fallopian_Tube	20.93328429	32.61622857	TRUE	TRUE
CHS.10133.59	CHS.10133.10	PHLDB1	721	1377	0.5236	72.3	59	1.2254	8159	6998	Colon	Brain	2.297611188	11.17384773	TRUE	TRUE
CHS.10134.14	CHS.10134.4	ARCN1	511	511	1	83.1	83.1	1	1223	9762	Bone_Marrow	Bone_Marrow	4.980719394	129.13325	FALSE	TRUE
CHS.10134.15	CHS.10134.4	ARCN1	552	511	1.0802	78.7	83.1	0.9471	17	9762	Esophagus	Bone_Marrow	9.38913	129.13325	TRUE	TRUE
CHS.10134.3	CHS.10134.4	ARCN1	417	511	0.816	79.4	83.1	0.9555	612	9762	Pituitary	Bone_Marrow	2.31389475	129.13325	TRUE	TRUE
CHS.10134.5	CHS.10134.4	ARCN1	423	511	0.8278	81.6	83.1	0.9819	5714	9762	Bone_Marrow	Bone_Marrow	4.097522525	129.13325	TRUE	TRUE
CHS.10136.2	CHS.10136.3	TREH	552	583	0.9468	89.8	91.4	0.9825	395	464	Small_Intestine	Small_Intestine	12.81306362	20.73395106	TRUE	TRUE
CHS.10136.5	CHS.10136.3	TREH	133	583	0.2281	90.6	91.4	0.9912	140	464	Testis	Small_Intestine	9.270476394	20.73395106	TRUE	TRUE
CHS.10136.6	CHS.10136.3	TREH	120	583	0.2058	78.2	91.4	0.8556	56	464	Testis	Small_Intestine	5.764686625	20.73395106	TRUE	TRUE
CHS.10136.9	CHS.10136.3	TREH	398	583	0.6827	89.3	91.4	0.977	4	464	Kidney	Small_Intestine	2.31014	20.73395106	TRUE	TRUE
CHS.10139.13	CHS.10139.11	DDX6	483	483	1	83.2	83.2	1	6655	9494	Spleen	Bone_Marrow	7.248366467	38.57341765	TRUE	TRUE
CHS.10139.5	CHS.10139.11	DDX6	483	483	1	83.2	83.2	1	6655	9494	Spleen	Bone_Marrow	7.248366467	38.57341765	TRUE	TRUE
CHS.10139.8	CHS.10139.11	DDX6	440	483	0.911	76.4	83.2	0.9183	740	9494	Nerve	Bone_Marrow	3.573617333	38.57341765	TRUE	TRUE
CHS.10139.9	CHS.10139.11	DDX6	434	483	0.8986	80.7	83.2	0.97	309	9494	Spleen	Bone_Marrow	2.4980975	38.57341765	TRUE	TRUE
CHS.10143.4	CHS.10143.3	CXCR5	327	372	0.879	83.2	80.1	1.0387	0	1524	-	Spleen	0	34.84121845	TRUE	TRUE
CHS.10145.3	CHS.10145.6	BCL9L	1499	1499	1	42.2	42.2	1	9337	9337	Spleen	Spleen	8.048731681	8.048731681	TRUE	TRUE
CHS.10145.31	CHS.10145.6	BCL9L	435	1499	0.2902	46.4	42.2	1.0995	0	9337	-	Spleen	0	8.048731681	TRUE	TRUE
CHS.10149.2	CHS.10149.1	UPK2	71	184	0.3859	67.8	71.2	0.9522	635	465	Blood	Bladder	3.883960348	210.615	TRUE	TRUE
CHS.10149.8	CHS.10149.1	UPK2	116	184	0.6304	60.4	71.2	0.8483	99	465	Bladder	Bladder	19.85149143	210.615	TRUE	TRUE
CHS.10152.14	CHS.10152.17	CENATAC	148	332	0.4458	78.8	74.6	1.0563	6791	9607	Thyroid	Thyroid	7.334810737	15.26286662	FALSE	TRUE
CHS.10152.15	CHS.10152.17	CENATAC	194	332	0.5843	85.2	74.6	1.1421	5504	9607	Uterus	Thyroid	14.89201754	15.26286662	FALSE	TRUE
CHS.10152.27	CHS.10152.17	CENATAC	142	332	0.4277	69.3	74.6	0.929	6024	9607	Spleen	Thyroid	20.92743488	15.26286662	FALSE	TRUE
CHS.10155.1	CHS.10155.2	TRAPPC4	114	219	0.5205	79.4	86.8	0.9147	8238	9784	Bone_Marrow	Bone_Marrow	16.29745707	61.3521951	FALSE	TRUE
CHS.10155.19	CHS.10155.2	TRAPPC4	170	219	0.7763	84.4	86.8	0.9724	754	9784	Cervix_Uteri	Bone_Marrow	9.285185	61.3521951	TRUE	TRUE
CHS.10155.3	CHS.10155.2	TRAPPC4	181	219	0.8265	85.3	86.8	0.9827	2526	9784	Bone_Marrow	Bone_Marrow	3.389656261	61.3521951	TRUE	TRUE
CHS.10155.4	CHS.10155.2	TRAPPC4	113	219	0.516	57.2	86.8	0.659	9598	9784	Nerve	Bone_Marrow	4.86218058	61.3521951	TRUE	TRUE
CHS.10155.5	CHS.10155.2	TRAPPC4	165	219	0.7534	81.5	86.8	0.9389	7480	9784	Bone_Marrow	Bone_Marrow	0.659703177	61.3521951	TRUE	TRUE
CHS.10155.6	CHS.10155.2	TRAPPC4	176	219	0.8037	80.5	86.8	0.9274	7766	9784	Bone_Marrow	Bone_Marrow	1.702275134	61.3521951	TRUE	TRUE
CHS.10155.7	CHS.10155.2	TRAPPC4	126	219	0.5753	78.7	86.8	0.9067	6771	9784	Bone_Marrow	Bone_Marrow	0.597452842	61.3521951	TRUE	TRUE
CHS.10157.12	CHS.10157.4	HYOU1	1000	999	1.001	80.4	80.3	1.0012	2881	9614	Bone_Marrow	Bone_Marrow	15.90564701	121.1524755	TRUE	FALSE
CHS.10157.14	CHS.10157.4	HYOU1	904	999	0.9049	81.6	80.3	1.0162	125	9614	Thyroid	Bone_Marrow	8.78643	121.1524755	FALSE	FALSE
CHS.10157.20	CHS.10157.4	HYOU1	937	999	0.9379	83.9	80.3	1.0448	5	9614	Blood_Vessel	Bone_Marrow	4.06711	121.1524755	FALSE	FALSE
CHS.10157.3	CHS.10157.4	HYOU1	999	999	1	80.3	80.3	1	3401	9614	Testis	Bone_Marrow	29.82183352	121.1524755	FALSE	FALSE
CHS.10157.8	CHS.10157.4	HYOU1	999	999	1	80.3	80.3	1	3401	9614	Testis	Bone_Marrow	29.82183352	121.1524755	TRUE	FALSE
CHS.10157.9	CHS.10157.4	HYOU1	999	999	1	80.3	80.3	1	3401	9614	Testis	Bone_Marrow	29.82183352	121.1524755	TRUE	FALSE
CHS.10162.1	CHS.10162.2	VPS11	931	941	0.9894	79.1	81.8	0.967	8262	9734	Pituitary	Uterus	21.72687435	31.23861948	TRUE	TRUE
CHS.10162.25	CHS.10162.2	VPS11	579	941	0.6153	80.3	81.8	0.9817	454	9734	Ovary	Uterus	3.016374333	31.23861948	TRUE	TRUE
CHS.10162.28	CHS.10162.2	VPS11	945	941	1.0043	81	81.8	0.9902	109	9734	Nerve	Uterus	2.99802	31.23861948	TRUE	TRUE
CHS.10162.29	CHS.10162.2	VPS11	945	941	1.0043	81	81.8	0.9902	114	9734	Nerve	Uterus	2.13075	31.23861948	TRUE	TRUE
CHS.10162.30	CHS.10162.2	VPS11	583	941	0.6196	81.8	81.8	1	18	9734	Testis	Uterus	2.60826	31.23861948	FALSE	TRUE
CHS.10162.33	CHS.10162.2	VPS11	405	941	0.4304	83.4	81.8	1.0196	3	9734	Esophagus	Uterus	1.134	31.23861948	FALSE	TRUE
CHS.10162.34	CHS.10162.2	VPS11	579	941	0.6153	80.3	81.8	0.9817	3	9734	Skin	Uterus	0.532544	31.23861948	TRUE	TRUE
CHS.10162.35	CHS.10162.2	VPS11	449	941	0.4772	78.5	81.8	0.9597	2	9734	Testis	Uterus	1.03044	31.23861948	TRUE	TRUE
CHS.10162.36	CHS.10162.2	VPS11	935	941	0.9936	78.1	81.8	0.9548	1	9734	Muscle	Uterus	0.397941	31.23861948	TRUE	TRUE
CHS.10162.37	CHS.10162.2	VPS11	936	941	0.9947	81.3	81.8	0.9939	0	9734	-	Uterus	0	31.23861948	TRUE	TRUE
CHS.10163.1	CHS.10163.4	HMBS	343	361	0.9501	89.3	89.1	1.0022	471	9686	Bone_Marrow	Bone_Marrow	4.30262	67.28529118	FALSE	FALSE
CHS.10163.14	CHS.10163.4	HMBS	344	361	0.9529	92.1	89.1	1.0337	7357	9686	Bone_Marrow	Bone_Marrow	15.32032871	67.28529118	FALSE	FALSE
CHS.10163.19	CHS.10163.4	HMBS	303	361	0.8393	85.6	89.1	0.9607	38	9686	Bone_Marrow	Bone_Marrow	1.67837	67.28529118	FALSE	FALSE
CHS.10163.20	CHS.10163.4	HMBS	355	361	0.9834	88.8	89.1	0.9966	1	9686	Lung	Bone_Marrow	0.625516	67.28529118	FALSE	FALSE
CHS.10163.25	CHS.10163.4	HMBS	330	361	0.9141	86.6	89.1	0.9719	11	9686	Bone_Marrow	Bone_Marrow	4.086915	67.28529118	FALSE	FALSE
CHS.10163.3	CHS.10163.4	HMBS	304	361	0.8421	86.4	89.1	0.9697	5363	9686	Bone_Marrow	Bone_Marrow	2.55493977	67.28529118	FALSE	FALSE
CHS.10163.5	CHS.10163.4	HMBS	321	361	0.8892	86.2	89.1	0.9675	6884	9686	Bone_Marrow	Bone_Marrow	3.029781099	67.28529118	FALSE	FALSE
CHS.10163.8	CHS.10163.4	HMBS	344	361	0.9529	92.1	89.1	1.0337	7357	9686	Bone_Marrow	Bone_Marrow	15.32032871	67.28529118	FALSE	FALSE
CHS.10164.2	CHS.10164.1	H2AX	143	143	1	84.8	84.8	1	4675	9788	Testis	Bone_Marrow	15.3762328	99.33221235	no_introns	TRUE
CHS.10165.10	CHS.10165.3	DPAGT1	434	408	1.0637	85.6	92.8	0.9224	407	9732	Thyroid	Bladder	15.39698	31.59776364	TRUE	TRUE
CHS.10165.40	CHS.10165.3	DPAGT1	306	408	0.75	91.6	92.8	0.9871	37	9732	Thyroid	Bladder	3.19771	31.59776364	TRUE	TRUE
CHS.10165.41	CHS.10165.3	DPAGT1	327	408	0.8015	85.3	92.8	0.9192	1181	9732	Fallopian_Tube	Bladder	15.4408	31.59776364	TRUE	TRUE
CHS.10165.49	CHS.10165.3	DPAGT1	377	408	0.924	88	92.8	0.9483	6	9732	Brain	Bladder	2.41181	31.59776364	TRUE	TRUE
CHS.10165.9	CHS.10165.3	DPAGT1	313	408	0.7672	90.3	92.8	0.9731	61	9732	Kidney	Bladder	4.40615	31.59776364	TRUE	TRUE
CHS.10167.1	CHS.10167.11	C2CD2L	706	706	1	62.4	62.4	1	153	9720	Pituitary	Pituitary	6.36651	29.28970844	TRUE	TRUE
CHS.10167.10	CHS.10167.11	C2CD2L	707	706	1.0014	62.7	62.4	1.0048	9470	9720	Bone_Marrow	Pituitary	6.557020297	29.28970844	TRUE	TRUE
CHS.10167.6	CHS.10167.11	C2CD2L	669	706	0.9476	58.8	62.4	0.9423	39	9720	Nerve	Pituitary	14.0468	29.28970844	TRUE	TRUE
CHS.10167.7	CHS.10167.11	C2CD2L	474	706	0.6714	70.7	62.4	1.133	596	9720	Small_Intestine	Pituitary	4.1857425	29.28970844	TRUE	TRUE
CHS.10167.9	CHS.10167.11	C2CD2L	644	706	0.9122	65.2	62.4	1.0449	266	9720	Brain	Pituitary	2.702543418	29.28970844	TRUE	TRUE
CHS.10169.1	CHS.10169.3	HINFP	517	517	1	72.8	72.8	1	3177	9669	Testis	Thyroid	13.13234782	14.01185295	FALSE	FALSE
CHS.10169.10	CHS.10169.3	HINFP	445	517	0.8607	74.5	72.8	1.0234	138	9669	Colon	Thyroid	4.021653333	14.01185295	FALSE	FALSE
CHS.10169.12	CHS.10169.3	HINFP	270	517	0.5222	63.6	72.8	0.8736	1795	9669	Testis	Thyroid	8.883174727	14.01185295	FALSE	FALSE
CHS.10169.13	CHS.10169.3	HINFP	445	517	0.8607	74.5	72.8	1.0234	138	9669	Colon	Thyroid	4.021653333	14.01185295	FALSE	FALSE
CHS.10169.16	CHS.10169.3	HINFP	270	517	0.5222	63.6	72.8	0.8736	1795	9669	Testis	Thyroid	8.883174727	14.01185295	FALSE	FALSE
CHS.10169.17	CHS.10169.3	HINFP	311	517	0.6015	65.5	72.8	0.8997	36	9669	Testis	Thyroid	5.04925	14.01185295	FALSE	FALSE
CHS.10169.18	CHS.10169.3	HINFP	270	517	0.5222	63.6	72.8	0.8736	1795	9669	Testis	Thyroid	8.883174727	14.01185295	FALSE	FALSE
CHS.10169.2	CHS.10169.3	HINFP	419	517	0.8104	77.8	72.8	1.0687	1744	9669	Cervix_Uteri	Thyroid	13.0785	14.01185295	FALSE	FALSE
CHS.10169.34	CHS.10169.3	HINFP	270	517	0.5222	63.6	72.8	0.8736	1795	9669	Testis	Thyroid	8.883174727	14.01185295	FALSE	FALSE
CHS.10169.37	CHS.10169.3	HINFP	540	517	1.0445	71.1	72.8	0.9766	0	9669	-	Thyroid	0	14.01185295	FALSE	FALSE
CHS.10169.4	CHS.10169.3	HINFP	270	517	0.5222	63.6	72.8	0.8736	1795	9669	Testis	Thyroid	8.883174727	14.01185295	FALSE	FALSE
CHS.10169.5	CHS.10169.3	HINFP	517	517	1	72.8	72.8	1	3177	9669	Testis	Thyroid	13.13234782	14.01185295	FALSE	FALSE
CHS.10169.6	CHS.10169.3	HINFP	270	517	0.5222	63.6	72.8	0.8736	1795	9669	Testis	Thyroid	8.883174727	14.01185295	TRUE	FALSE
CHS.10169.7	CHS.10169.3	HINFP	311	517	0.6015	65.5	72.8	0.8997	36	9669	Testis	Thyroid	5.04925	14.01185295	TRUE	FALSE
CHS.10169.8	CHS.10169.3	HINFP	517	517	1	72.8	72.8	1	3177	9669	Testis	Thyroid	13.13234782	14.01185295	FALSE	FALSE
CHS.10169.9	CHS.10169.3	HINFP	517	517	1	72.8	72.8	1	3177	9669	Testis	Thyroid	13.13234782	14.01185295	FALSE	FALSE
CHS.10170.12	CHS.10170.1	ABCG4	546	646	0.8452	87	83.7	1.0394	303	1309	Skin	Brain	17.968	12.92924018	FALSE	TRUE
CHS.10170.13	CHS.10170.1	ABCG4	585	646	0.9056	86.6	83.7	1.0346	325	1309	Brain	Brain	6.172369831	12.92924018	FALSE	TRUE
CHS.10170.3	CHS.10170.1	ABCG4	585	646	0.9056	86.6	83.7	1.0346	325	1309	Brain	Brain	6.172369831	12.92924018	FALSE	TRUE
CHS.10170.4	CHS.10170.1	ABCG4	646	646	1	83.7	83.7	1	393	1309	Pituitary	Brain	1.84266	12.92924018	TRUE	TRUE
CHS.10170.6	CHS.10170.1	ABCG4	646	646	1	83.7	83.7	1	393	1309	Pituitary	Brain	1.84266	12.92924018	TRUE	TRUE
CHS.10171.1	CHS.10171.8	NLRX1	975	975	1	77.9	77.9	1	7583	7713	Bladder	Bladder	5.568345556	7.39720875	TRUE	FALSE
CHS.10171.10	CHS.10171.8	NLRX1	975	975	1	77.9	77.9	1	7583	7713	Bladder	Bladder	5.568345556	7.39720875	FALSE	FALSE
CHS.10171.11	CHS.10171.8	NLRX1	975	975	1	77.9	77.9	1	7583	7713	Bladder	Bladder	5.568345556	7.39720875	FALSE	FALSE
CHS.10171.17	CHS.10171.8	NLRX1	921	975	0.9446	75.2	77.9	0.9653	1094	7713	Esophagus	Bladder	2.419291373	7.39720875	FALSE	FALSE
CHS.10171.28	CHS.10171.8	NLRX1	869	975	0.8913	77.5	77.9	0.9949	35	7713	Adipose_Tissue	Bladder	2.17469	7.39720875	FALSE	FALSE
CHS.10171.33	CHS.10171.8	NLRX1	691	975	0.7087	83.8	77.9	1.0757	53	7713	Spleen	Bladder	1.89302	7.39720875	FALSE	FALSE
CHS.10171.7	CHS.10171.8	NLRX1	975	975	1	77.9	77.9	1	7583	7713	Bladder	Bladder	5.568345556	7.39720875	TRUE	FALSE
CHS.10171.9	CHS.10171.8	NLRX1	797	975	0.8174	82.7	77.9	1.0616	1109	7713	Uterus	Bladder	3.261986903	7.39720875	TRUE	FALSE
CHS.10172.11	CHS.10172.3	PDZD3	506	505	1.002	75.3	76.2	0.9882	1	443	Kidney	Small_Intestine	1.59044	10.5066699	TRUE	TRUE
CHS.10172.12	CHS.10172.3	PDZD3	571	505	1.1307	68.7	76.2	0.9016	56	443	Kidney	Small_Intestine	8.500754833	10.5066699	TRUE	TRUE
CHS.10172.16	CHS.10172.3	PDZD3	386	505	0.7644	64.2	76.2	0.8425	355	443	Small_Intestine	Small_Intestine	39.16584649	10.5066699	TRUE	TRUE
CHS.10172.2	CHS.10172.3	PDZD3	492	505	0.9743	76.4	76.2	1.0026	403	443	Small_Intestine	Small_Intestine	6.843717823	10.5066699	TRUE	TRUE
CHS.10172.4	CHS.10172.3	PDZD3	491	505	0.9723	73.1	76.2	0.9593	345	443	Colon	Small_Intestine	4.075674721	10.5066699	TRUE	TRUE
CHS.10173.1	CHS.10173.14	CCDC153	210	210	1	88.8	88.8	1	1588	333	Fallopian_Tube	Cervix_Uteri	18.523295	5.6874	FALSE	TRUE
CHS.10173.21	CHS.10173.14	CCDC153	139	210	0.6619	88	88.8	0.991	717	333	Pituitary	Cervix_Uteri	2.344819833	5.6874	FALSE	TRUE
CHS.10173.26	CHS.10173.14	CCDC153	178	210	0.8476	79.4	88.8	0.8941	1048	333	Testis	Cervix_Uteri	9.920342299	5.6874	FALSE	TRUE
CHS.10173.3	CHS.10173.14	CCDC153	170	210	0.8095	88	88.8	0.991	602	333	Pituitary	Cervix_Uteri	5.025753846	5.6874	FALSE	TRUE
CHS.10175.10	CHS.10175.2	MCAM	614	646	0.9505	82.8	80.3	1.0311	569	9426	Heart	Blood_Vessel	9.403300126	1482.945443	TRUE	TRUE
CHS.10175.11	CHS.10175.2	MCAM	604	646	0.935	83.8	80.3	1.0436	2042	9426	Blood_Vessel	Blood_Vessel	159.9365284	1482.945443	TRUE	TRUE
CHS.10175.17	CHS.10175.2	MCAM	534	646	0.8266	86.8	80.3	1.0809	2	9426	Brain	Blood_Vessel	57.02355	1482.945443	TRUE	TRUE
CHS.10175.21	CHS.10175.2	MCAM	578	646	0.8947	83.3	80.3	1.0374	72	9426	Blood_Vessel	Blood_Vessel	225.506	1482.945443	TRUE	TRUE
CHS.10175.22	CHS.10175.2	MCAM	609	646	0.9427	79.2	80.3	0.9863	45	9426	Blood_Vessel	Blood_Vessel	40.03370345	1482.945443	TRUE	TRUE
CHS.10175.8	CHS.10175.2	MCAM	583	646	0.9025	82.1	80.3	1.0224	211	9426	Blood_Vessel	Blood_Vessel	60.49708	1482.945443	TRUE	TRUE
CHS.10175.9	CHS.10175.2	MCAM	625	646	0.9675	79	80.3	0.9838	263	9426	Blood_Vessel	Blood_Vessel	45.28015357	1482.945443	TRUE	TRUE
CHS.10180.7	CHS.10180.1	C1QTNF5	60	243	0.2469	68.2	78.6	0.8677	1832	8273	Blood_Vessel	Blood_Vessel	9.991042795	54.64298114	TRUE	TRUE
CHS.10182.11	CHS.10182.8	USP2	605	605	1	65.7	65.7	1	1046	5407	Muscle	Testis	55.85867325	126.5194036	TRUE	TRUE
CHS.10182.12	CHS.10182.8	USP2	605	605	1	65.7	65.7	1	1046	5407	Muscle	Testis	55.85867325	126.5194036	TRUE	TRUE
CHS.10182.2	CHS.10182.8	USP2	396	605	0.6545	85.3	65.7	1.2983	7695	5407	Kidney	Testis	24.35970085	126.5194036	TRUE	TRUE
CHS.10182.7	CHS.10182.8	USP2	362	605	0.5983	89	65.7	1.3546	3275	5407	Testis	Testis	13.09895936	126.5194036	TRUE	TRUE
CHS.10184.18	CHS.10184.5	THY1	144	161	0.8944	84.9	82.7	1.0266	5	9203	Blood_Vessel	Brain	4.41737	200.442657	TRUE	TRUE
CHS.10184.23	CHS.10184.5	THY1	76	161	0.472	79	82.7	0.9553	0	9203	-	Brain	0	200.442657	TRUE	TRUE
CHS.10184.4	CHS.10184.5	THY1	161	161	1	82.7	82.7	1	1606	9203	Skin	Brain	1.720907144	200.442657	TRUE	TRUE
CHS.10191.1	CHS.10191.6	NECTIN1	458	517	0.8859	80	75.1	1.0652	266	8595	Pituitary	Skin	0.587108231	75.39493777	TRUE	TRUE
CHS.10191.8	CHS.10191.6	NECTIN1	352	517	0.6809	88.3	75.1	1.1758	7405	8595	Skin	Skin	10.40456671	75.39493777	TRUE	TRUE
CHS.10205.11	CHS.10205.14	TRIM29	327	588	0.5561	66.8	59	1.1322	3459	5454	Skin	Skin	25.85797347	922.824344	TRUE	TRUE
CHS.10205.9	CHS.10205.14	TRIM29	321	588	0.5459	60.3	59	1.022	862	5454	Fallopian_Tube	Skin	8.6030285	922.824344	TRUE	TRUE
CHS.10212.1	CHS.10212.5	POU2F3	438	436	1.0046	55.3	55.3	1	84	1292	Esophagus	Skin	1.327853	69.46057379	FALSE	FALSE
CHS.10215.3	CHS.10215.5	TLCD5	267	245	1.0898	91.7	94.7	0.9683	6729	8294	Uterus	Brain	3.70185838	8.009078217	TRUE	TRUE
CHS.10215.4	CHS.10215.5	TLCD5	148	245	0.6041	85.1	94.7	0.8986	6519	8294	Cervix_Uteri	Brain	1.1558184	8.009078217	TRUE	TRUE
CHS.10215.6	CHS.10215.5	TLCD5	126	245	0.5143	88.7	94.7	0.9366	877	8294	Brain	Brain	1.306643414	8.009078217	TRUE	TRUE
CHS.10215.7	CHS.10215.5	TLCD5	144	245	0.5878	87.4	94.7	0.9229	8348	8294	Blood_Vessel	Brain	3.772694422	8.009078217	TRUE	TRUE
CHS.10215.8	CHS.10215.5	TLCD5	144	245	0.5878	87.4	94.7	0.9229	8348	8294	Blood_Vessel	Brain	3.772694422	8.009078217	TRUE	TRUE
CHS.10215.9	CHS.10215.5	TLCD5	144	245	0.5878	87.4	94.7	0.9229	8348	8294	Blood_Vessel	Brain	3.772694422	8.009078217	TRUE	TRUE
CHS.10218.18	CHS.10218.1	GRIK4	956	956	1	78.8	78.8	1	161	1483	Thyroid	Brain	2.867385842	4.351784289	FALSE	FALSE
CHS.10218.5	CHS.10218.1	GRIK4	765	956	0.8002	85.4	78.8	1.0838	705	1483	Thyroid	Brain	0.682130393	4.351784289	FALSE	FALSE
CHS.10218.6	CHS.10218.1	GRIK4	956	956	1	78.8	78.8	1	217	1483	Pituitary	Brain	0.650053	4.351784289	FALSE	FALSE
CHS.10218.8	CHS.10218.1	GRIK4	888	956	0.9289	76.4	78.8	0.9695	2	1483	Lung	Brain	1.41734	4.351784289	FALSE	FALSE
CHS.10218.9	CHS.10218.1	GRIK4	902	956	0.9435	78.3	78.8	0.9937	6	1483	Thyroid	Brain	1.602855667	4.351784289	FALSE	FALSE
CHS.10225.1	CHS.10225.5	TBCEL	118	424	0.2783	67.9	89.3	0.7604	1135	8413	Lung	Uterus	2.679698171	8.524631308	FALSE	FALSE
CHS.10225.2	CHS.10225.5	TBCEL	424	424	1	89.3	89.3	1	8413	8413	Uterus	Uterus	8.524631308	8.524631308	TRUE	FALSE
CHS.10225.23	CHS.10225.5	TBCEL	280	424	0.6604	89.5	89.3	1.0022	1513	8413	Nerve	Uterus	2.734726731	8.524631308	FALSE	FALSE
CHS.10225.3	CHS.10225.5	TBCEL	424	424	1	89.3	89.3	1	8413	8413	Uterus	Uterus	8.524631308	8.524631308	FALSE	FALSE
CHS.10225.8	CHS.10225.5	TBCEL	424	424	1	89.3	89.3	1	1670	8413	Fallopian_Tube	Uterus	3.70314	8.524631308	FALSE	FALSE
CHS.10230.10	CHS.10230.1	SC5D	299	299	1	91.3	91.3	1	5804	9582	Liver	Liver	3.010297845	27.42168239	FALSE	FALSE
CHS.10230.7	CHS.10230.1	SC5D	209	299	0.699	72.3	91.3	0.7919	352	9582	Liver	Liver	2.243246667	27.42168239	FALSE	FALSE
CHS.10234.26	CHS.10234.3	SORL1	829	2214	0.3744	77	73.2	1.0519	109	4057	Blood	Blood	3.860186544	71.25948371	TRUE	FALSE
CHS.10259.1	CHS.10259.2	UBASH3B	614	649	0.9461	84.6	84.3	1.0036	82	3741	Brain	Brain	3.014671188	22.34519412	TRUE	TRUE
CHS.10259.13	CHS.10259.2	UBASH3B	533	649	0.8213	82.4	84.3	0.9775	57	3741	Brain	Brain	3.866670316	22.34519412	TRUE	TRUE
CHS.10259.5	CHS.10259.2	UBASH3B	677	649	1.0431	80.2	84.3	0.9514	31	3741	Brain	Brain	1.5324026	22.34519412	TRUE	TRUE
CHS.10261.4	CHS.10261.2	CRTAM	84	393	0.2137	62.8	73.1	0.8591	228	462	Brain	Brain	19.55816203	5.350952	TRUE	TRUE
CHS.10261.6	CHS.10261.2	CRTAM	194	393	0.4936	56.8	73.1	0.777	1687	462	Brain	Brain	122.4063874	5.350952	TRUE	TRUE
CHS.10262.11	CHS.10262.4	JHY	778	778	1	47.8	47.8	1	119	5824	Testis	Testis	4.70534	28.98894327	FALSE	FALSE
CHS.10262.20	CHS.10262.4	JHY	751	778	0.9653	47.9	47.8	1.0021	19	5824	Lung	Testis	2.93668	28.98894327	FALSE	FALSE
CHS.10262.22	CHS.10262.4	JHY	332	778	0.4267	55	47.8	1.1506	591	5824	Testis	Testis	2.448591023	28.98894327	FALSE	FALSE
CHS.10262.3	CHS.10262.4	JHY	307	778	0.3946	54.6	47.8	1.1423	3682	5824	Testis	Testis	1.266492337	28.98894327	FALSE	FALSE
CHS.10262.9	CHS.10262.4	JHY	740	778	0.9512	47.2	47.8	0.9874	134	5824	Testis	Testis	2.687408929	28.98894327	FALSE	FALSE
CHS.10267.3	CHS.10267.4	HSPA8	493	646	0.7632	90.5	86.6	1.045	9784	9787	Bone_Marrow	Bone_Marrow	13.64777127	1530.85049	FALSE	FALSE
CHS.10267.5	CHS.10267.4	HSPA8	646	646	1	86.6	86.6	1	1717	9787	Testis	Bone_Marrow	46.95765859	1530.85049	FALSE	FALSE
CHS.10269.16	CHS.10269.8	CLMP	226	373	0.6059	88.8	75.5	1.1762	730	6780	Cervix_Uteri	Uterus	4.62412	50.59396865	TRUE	TRUE
CHS.10269.18	CHS.10269.8	CLMP	269	373	0.7212	82.7	75.5	1.0954	376	6780	Prostate	Uterus	4.19258	50.59396865	TRUE	TRUE
CHS.10278.2	CHS.10278.17	GRAMD1B	765	877	0.8723	63.5	59	1.0763	125	1010	Brain	Adrenal_Gland	23.18443464	50.02892932	TRUE	TRUE
CHS.10278.21	CHS.10278.17	GRAMD1B	713	877	0.813	64.8	59	1.0983	2355	1010	Adrenal_Gland	Adrenal_Gland	2.161570412	50.02892932	TRUE	TRUE
CHS.10278.3	CHS.10278.17	GRAMD1B	761	877	0.8677	63.9	59	1.0831	223	1010	Brain	Adrenal_Gland	8.460259677	50.02892932	TRUE	TRUE
CHS.10278.30	CHS.10278.17	GRAMD1B	698	877	0.7959	66.9	59	1.1339	1062	1010	Brain	Adrenal_Gland	3.300163052	50.02892932	TRUE	TRUE
CHS.10278.31	CHS.10278.17	GRAMD1B	698	877	0.7959	66.9	59	1.1339	1062	1010	Brain	Adrenal_Gland	3.300163052	50.02892932	TRUE	TRUE
CHS.10278.32	CHS.10278.17	GRAMD1B	694	877	0.7913	65	59	1.1017	449	1010	Brain	Adrenal_Gland	3.50395926	50.02892932	TRUE	TRUE
CHS.10278.37	CHS.10278.17	GRAMD1B	734	877	0.8369	65.2	59	1.1051	934	1010	Nerve	Adrenal_Gland	6.24285309	50.02892932	TRUE	TRUE
CHS.10278.38	CHS.10278.17	GRAMD1B	745	877	0.8495	64.2	59	1.0881	352	1010	Brain	Adrenal_Gland	7.931576496	50.02892932	TRUE	TRUE
CHS.10278.39	CHS.10278.17	GRAMD1B	738	877	0.8415	64.5	59	1.0932	1304	1010	Skin	Adrenal_Gland	109.593	50.02892932	TRUE	TRUE
CHS.10278.43	CHS.10278.17	GRAMD1B	730	877	0.8324	65	59	1.1017	449	1010	Brain	Adrenal_Gland	3.50395926	50.02892932	TRUE	TRUE
CHS.10278.45	CHS.10278.17	GRAMD1B	713	877	0.813	64.8	59	1.0983	2355	1010	Adrenal_Gland	Adrenal_Gland	2.161570412	50.02892932	TRUE	TRUE
CHS.10278.46	CHS.10278.17	GRAMD1B	694	877	0.7913	65	59	1.1017	449	1010	Brain	Adrenal_Gland	3.50395926	50.02892932	TRUE	TRUE
CHS.10278.47	CHS.10278.17	GRAMD1B	698	877	0.7959	66.9	59	1.1339	1062	1010	Brain	Adrenal_Gland	3.300163052	50.02892932	TRUE	TRUE
CHS.10278.51	CHS.10278.17	GRAMD1B	698	877	0.7959	66.4	59	1.1254	683	1010	Stomach	Adrenal_Gland	8.753795779	50.02892932	TRUE	TRUE
CHS.10278.53	CHS.10278.17	GRAMD1B	702	877	0.8005	66.4	59	1.1254	299	1010	Stomach	Adrenal_Gland	2.547813889	50.02892932	TRUE	TRUE
CHS.10278.61	CHS.10278.17	GRAMD1B	833	877	0.9498	60.2	59	1.0203	84	1010	Adrenal_Gland	Adrenal_Gland	9.626538	50.02892932	TRUE	TRUE
CHS.10278.67	CHS.10278.17	GRAMD1B	876	877	0.9989	58.5	59	0.9915	116	1010	Adrenal_Gland	Adrenal_Gland	7.937992295	50.02892932	TRUE	TRUE
CHS.10278.72	CHS.10278.17	GRAMD1B	694	877	0.7913	65	59	1.1017	449	1010	Brain	Adrenal_Gland	3.50395926	50.02892932	TRUE	TRUE
CHS.10278.83	CHS.10278.17	GRAMD1B	762	877	0.8689	63.2	59	1.0712	1	1010	Brain	Adrenal_Gland	0.931733	50.02892932	TRUE	TRUE
CHS.10278.90	CHS.10278.17	GRAMD1B	789	877	0.8997	62.4	59	1.0576	1	1010	Brain	Adrenal_Gland	3.40667	50.02892932	FALSE	TRUE
CHS.10278.95	CHS.10278.17	GRAMD1B	901	877	1.0274	58.2	59	0.9864	0	1010	-	Adrenal_Gland	0	50.02892932	FALSE	TRUE
CHS.10280.15	CHS.10280.5	SCN3B	164	215	0.7628	86.6	84.7	1.0224	93	3878	Muscle	Brain	4.002674856	16.10138648	FALSE	FALSE
CHS.10280.4	CHS.10280.5	SCN3B	215	215	1	84.7	84.7	1	3878	3878	Brain	Brain	16.10138648	16.10138648	FALSE	FALSE
CHS.10280.6	CHS.10280.5	SCN3B	215	215	1	84.7	84.7	1	3878	3878	Brain	Brain	16.10138648	16.10138648	FALSE	FALSE
CHS.10282.1	CHS.10282.3	ZNF202	424	648	0.6543	56.6	56	1.0107	944	6730	Fallopian_Tube	Uterus	2.98289	3.715644568	TRUE	TRUE
CHS.10282.10	CHS.10282.3	ZNF202	424	648	0.6543	56.6	56	1.0107	2521	6730	Fallopian_Tube	Uterus	7.420215	3.715644568	TRUE	TRUE
CHS.10282.11	CHS.10282.3	ZNF202	648	648	1	56	56	1	6730	6730	Uterus	Uterus	3.715644568	3.715644568	TRUE	TRUE
CHS.10282.15	CHS.10282.3	ZNF202	648	648	1	56	56	1	6730	6730	Uterus	Uterus	3.715644568	3.715644568	FALSE	TRUE
CHS.10282.2	CHS.10282.3	ZNF202	648	648	1	56	56	1	6730	6730	Uterus	Uterus	3.715644568	3.715644568	TRUE	TRUE
CHS.10282.4	CHS.10282.3	ZNF202	648	648	1	56	56	1	6730	6730	Uterus	Uterus	3.715644568	3.715644568	FALSE	TRUE
CHS.10287.1	CHS.10287.5	TMEM225	157	225	0.6978	59.5	74.3	0.8008	141	200	Testis	Testis	2.789917929	14.41570456	FALSE	TRUE
CHS.10287.2	CHS.10287.5	TMEM225	175	225	0.7778	59.1	74.3	0.7954	197	200	Testis	Testis	4.516344256	14.41570456	TRUE	TRUE
CHS.1029.6	CHS.1029.1	MATN1	303	496	0.6109	81.8	84.9	0.9635	74	27	Bone_Marrow	Brain	1.353177043	0.907206	FALSE	TRUE
CHS.1029.8	CHS.1029.1	MATN1	414	496	0.8347	74.1	84.9	0.8728	149	27	Cervix_Uteri	Brain	1.782072	0.907206	TRUE	TRUE
CHS.10299.1	CHS.10299.3	VWA5A	415	786	0.528	84	83.6	1.0048	9029	8730	Pituitary	Pituitary	6.548452592	38.77983138	FALSE	FALSE
CHS.10299.4	CHS.10299.3	VWA5A	786	786	1	83.6	83.6	1	8730	8730	Pituitary	Pituitary	38.77983138	38.77983138	FALSE	FALSE
CHS.103.13	CHS.103.10	ATAD3B	602	648	0.929	75	74.5	1.0067	9740	9654	Testis	Bone_Marrow	0.696536816	34.42833812	FALSE	FALSE
CHS.103.20	CHS.103.10	ATAD3B	602	648	0.929	75	74.5	1.0067	5924	9654	Pituitary	Bone_Marrow	21.30042	34.42833812	FALSE	FALSE
CHS.103.22	CHS.103.10	ATAD3B	400	648	0.6173	80.1	74.5	1.0752	1471	9654	Pituitary	Bone_Marrow	18.50533467	34.42833812	FALSE	FALSE
CHS.103.5	CHS.103.10	ATAD3B	483	648	0.7454	71	74.5	0.953	143	9654	Testis	Bone_Marrow	10.4405	34.42833812	FALSE	FALSE
CHS.103.6	CHS.103.10	ATAD3B	476	648	0.7346	71.5	74.5	0.9597	10	9654	Skin	Bone_Marrow	1.48314	34.42833812	FALSE	FALSE
CHS.103.7	CHS.103.10	ATAD3B	586	648	0.9043	78.2	74.5	1.0497	1	9654	Skin	Bone_Marrow	7.17831	34.42833812	FALSE	FALSE
CHS.103.9	CHS.103.10	ATAD3B	437	648	0.6744	74.2	74.5	0.996	4389	9654	Skin	Bone_Marrow	16.1513348	34.42833812	FALSE	FALSE
CHS.10317.35	CHS.10317.6	TBRG1	187	411	0.455	73.1	69.8	1.0473	5932	9206	Thyroid	Spleen	20.00241909	5.392639492	TRUE	TRUE
CHS.10317.7	CHS.10317.6	TBRG1	260	411	0.6326	70.7	69.8	1.0129	9763	9206	Brain	Spleen	12.10718366	5.392639492	TRUE	TRUE
CHS.10318.5	CHS.10318.3	SIAE	488	523	0.9331	93.6	91.1	1.0274	216	9471	Testis	Thyroid	5.412803588	33.96199278	FALSE	FALSE
CHS.10318.6	CHS.10318.3	SIAE	332	523	0.6348	91.6	91.1	1.0055	4350	9471	Testis	Thyroid	9.077218282	33.96199278	FALSE	FALSE
CHS.1032.16	CHS.1032.5	LAPTM5	295	262	1.126	55.2	69	0.8	1557	9581	Blood	Blood	13.8190945	961.3625933	FALSE	TRUE
CHS.10322.9	CHS.10322.10	NRGN	78	78	1	64.4	64.4	1	9058	9390	Brain	Brain	522.1520053	434.2022564	TRUE	TRUE
CHS.10323.13	CHS.10323.1	VSIG2	284	327	0.8685	87	80.7	1.0781	3791	3735	Stomach	Stomach	24.49932956	302.784334	TRUE	TRUE
CHS.10324.10	CHS.10324.5	ESAM	245	390	0.6282	88.5	74.8	1.1832	2573	9400	Blood_Vessel	Thyroid	18.62307808	242.8230008	TRUE	TRUE
CHS.10324.20	CHS.10324.5	ESAM	152	390	0.3897	85.1	74.8	1.1377	1262	9400	Thyroid	Thyroid	16.23009091	242.8230008	FALSE	TRUE
CHS.10324.4	CHS.10324.5	ESAM	317	390	0.8128	75.1	74.8	1.004	42	9400	Adipose_Tissue	Thyroid	6.93431	242.8230008	TRUE	TRUE
CHS.10324.9	CHS.10324.5	ESAM	211	390	0.541	58	74.8	0.7754	1366	9400	Lung	Thyroid	10.42651456	242.8230008	TRUE	TRUE
CHS.10326.10	CHS.10326.13	MSANTD2	179	559	0.3202	79.4	63.9	1.2426	3617	7130	Blood_Vessel	Thyroid	0.863822112	5.587767714	TRUE	TRUE
CHS.10326.11	CHS.10326.13	MSANTD2	507	559	0.907	66.3	63.9	1.0376	6864	7130	Thyroid	Thyroid	2.132842702	5.587767714	TRUE	TRUE
CHS.10326.12	CHS.10326.13	MSANTD2	329	559	0.5886	76.2	63.9	1.1925	9695	7130	Thyroid	Thyroid	17.04206436	5.587767714	TRUE	TRUE
CHS.10326.26	CHS.10326.13	MSANTD2	329	559	0.5886	76.2	63.9	1.1925	6843	7130	Thyroid	Thyroid	15.21298689	5.587767714	TRUE	TRUE
CHS.10326.7	CHS.10326.13	MSANTD2	329	559	0.5886	76.2	63.9	1.1925	9695	7130	Thyroid	Thyroid	17.04206436	5.587767714	TRUE	TRUE
CHS.10326.8	CHS.10326.13	MSANTD2	329	559	0.5886	76.2	63.9	1.1925	9695	7130	Thyroid	Thyroid	17.04206436	5.587767714	TRUE	TRUE
CHS.10326.9	CHS.10326.13	MSANTD2	329	559	0.5886	76.2	63.9	1.1925	9695	7130	Thyroid	Thyroid	17.04206436	5.587767714	TRUE	TRUE
CHS.10328.15	CHS.10328.1	ROBO3	311	1386	0.2244	50.6	63.8	0.7931	5152	53	Ovary	Brain	44.59285115	1.83758362	FALSE	FALSE
CHS.10328.30	CHS.10328.1	ROBO3	435	1386	0.3139	46.2	63.8	0.7241	1088	53	Ovary	Brain	7.189485	1.83758362	FALSE	FALSE
CHS.10328.33	CHS.10328.1	ROBO3	370	1386	0.267	47.4	63.8	0.7429	150	53	Ovary	Brain	3.985196667	1.83758362	FALSE	FALSE
CHS.10328.35	CHS.10328.1	ROBO3	370	1386	0.267	47.4	63.8	0.7429	150	53	Ovary	Brain	3.985196667	1.83758362	FALSE	FALSE
CHS.10328.4	CHS.10328.1	ROBO3	435	1386	0.3139	46.2	63.8	0.7241	1088	53	Ovary	Brain	7.189485	1.83758362	FALSE	FALSE
CHS.10328.44	CHS.10328.1	ROBO3	435	1386	0.3139	46.2	63.8	0.7241	1088	53	Ovary	Brain	7.189485	1.83758362	FALSE	FALSE
CHS.10328.49	CHS.10328.1	ROBO3	435	1386	0.3139	46.2	63.8	0.7241	1088	53	Ovary	Brain	7.189485	1.83758362	FALSE	FALSE
CHS.10328.50	CHS.10328.1	ROBO3	435	1386	0.3139	46.2	63.8	0.7241	1088	53	Ovary	Brain	7.189485	1.83758362	FALSE	FALSE
CHS.10328.7	CHS.10328.1	ROBO3	435	1386	0.3139	46.2	63.8	0.7241	1088	53	Ovary	Brain	7.189485	1.83758362	FALSE	FALSE
CHS.10329.4	CHS.10329.5	ROBO4	862	1007	0.856	52.8	57.6	0.9167	5583	8427	Spleen	Spleen	12.56077838	69.06481797	FALSE	FALSE
CHS.10329.8	CHS.10329.5	ROBO4	565	1007	0.5611	42.1	57.6	0.7309	1049	8427	Spleen	Spleen	11.714212	69.06481797	FALSE	FALSE
CHS.10331.2	CHS.10331.4	HEPACAM	415	416	0.9976	69.3	70.2	0.9872	707	2862	Brain	Brain	5.437869877	68.23982257	TRUE	TRUE
CHS.10331.3	CHS.10331.4	HEPACAM	468	416	1.125	65.2	70.2	0.9288	1183	2862	Brain	Brain	8.758593408	68.23982257	TRUE	TRUE
CHS.10334.13	CHS.10334.7	CCDC15	910	951	0.9569	48.5	47.8	1.0146	226	903	Breast	Testis	2.18431	11.10969437	FALSE	FALSE
CHS.10334.8	CHS.10334.7	CCDC15	991	951	1.0421	47.1	47.8	0.9854	155	903	Testis	Testis	3.579311122	11.10969437	FALSE	FALSE
CHS.10336.20	CHS.10336.6	SLC37A2	359	501	0.7166	75	83.1	0.9025	20	4028	Bladder	Adrenal_Gland	12.9749	64.24537862	TRUE	TRUE
CHS.10336.22	CHS.10336.6	SLC37A2	497	501	0.992	83.6	83.1	1.006	688	4028	Adrenal_Gland	Adrenal_Gland	22.02691484	64.24537862	TRUE	TRUE
CHS.10336.5	CHS.10336.6	SLC37A2	505	501	1.008	83.2	83.1	1.0012	1456	4028	Skin	Adrenal_Gland	41.98253884	64.24537862	TRUE	TRUE
CHS.10336.8	CHS.10336.6	SLC37A2	385	501	0.7685	75.3	83.1	0.9061	219	4028	Adrenal_Gland	Adrenal_Gland	6.67852	64.24537862	TRUE	TRUE
CHS.10337.12	CHS.10337.5	TMEM218	115	115	1	85.4	85.4	1	6703	9118	Cervix_Uteri	Fallopian_Tube	2.009883	2.834707143	FALSE	FALSE
CHS.10337.14	CHS.10337.5	TMEM218	115	115	1	85.4	85.4	1	6703	9118	Cervix_Uteri	Fallopian_Tube	2.009883	2.834707143	FALSE	FALSE
CHS.10337.15	CHS.10337.5	TMEM218	115	115	1	85.4	85.4	1	6703	9118	Cervix_Uteri	Fallopian_Tube	2.009883	2.834707143	FALSE	FALSE
CHS.10337.17	CHS.10337.5	TMEM218	115	115	1	85.4	85.4	1	6703	9118	Cervix_Uteri	Fallopian_Tube	2.009883	2.834707143	FALSE	FALSE
CHS.10337.19	CHS.10337.5	TMEM218	115	115	1	85.4	85.4	1	6703	9118	Cervix_Uteri	Fallopian_Tube	2.009883	2.834707143	FALSE	FALSE
CHS.10337.20	CHS.10337.5	TMEM218	115	115	1	85.4	85.4	1	6703	9118	Cervix_Uteri	Fallopian_Tube	2.009883	2.834707143	FALSE	FALSE
CHS.10337.21	CHS.10337.5	TMEM218	115	115	1	85.4	85.4	1	6703	9118	Cervix_Uteri	Fallopian_Tube	2.009883	2.834707143	FALSE	FALSE
CHS.10337.22	CHS.10337.5	TMEM218	115	115	1	85.4	85.4	1	6703	9118	Cervix_Uteri	Fallopian_Tube	2.009883	2.834707143	FALSE	FALSE
CHS.10337.27	CHS.10337.5	TMEM218	115	115	1	85.4	85.4	1	6703	9118	Cervix_Uteri	Fallopian_Tube	2.009883	2.834707143	FALSE	FALSE
CHS.10337.3	CHS.10337.5	TMEM218	115	115	1	85.4	85.4	1	6703	9118	Cervix_Uteri	Fallopian_Tube	2.009883	2.834707143	FALSE	FALSE
CHS.10337.32	CHS.10337.5	TMEM218	115	115	1	85.4	85.4	1	6703	9118	Cervix_Uteri	Fallopian_Tube	2.009883	2.834707143	FALSE	FALSE
CHS.10337.33	CHS.10337.5	TMEM218	115	115	1	85.4	85.4	1	6703	9118	Cervix_Uteri	Fallopian_Tube	2.009883	2.834707143	FALSE	FALSE
CHS.10337.34	CHS.10337.5	TMEM218	115	115	1	85.4	85.4	1	6703	9118	Cervix_Uteri	Fallopian_Tube	2.009883	2.834707143	FALSE	FALSE
CHS.10337.35	CHS.10337.5	TMEM218	88	115	0.7652	74.1	85.4	0.8677	65	9118	Skin	Fallopian_Tube	2.233075778	2.834707143	FALSE	FALSE
CHS.10337.36	CHS.10337.5	TMEM218	88	115	0.7652	74.1	85.4	0.8677	65	9118	Skin	Fallopian_Tube	2.233075778	2.834707143	FALSE	FALSE
CHS.10337.39	CHS.10337.5	TMEM218	115	115	1	85.4	85.4	1	6703	9118	Cervix_Uteri	Fallopian_Tube	2.009883	2.834707143	FALSE	FALSE
CHS.10337.40	CHS.10337.5	TMEM218	115	115	1	85.4	85.4	1	6703	9118	Cervix_Uteri	Fallopian_Tube	2.009883	2.834707143	FALSE	FALSE
CHS.10337.41	CHS.10337.5	TMEM218	115	115	1	85.4	85.4	1	6703	9118	Cervix_Uteri	Fallopian_Tube	2.009883	2.834707143	FALSE	FALSE
CHS.10337.42	CHS.10337.5	TMEM218	115	115	1	85.4	85.4	1	6703	9118	Cervix_Uteri	Fallopian_Tube	2.009883	2.834707143	FALSE	FALSE
CHS.10337.43	CHS.10337.5	TMEM218	88	115	0.7652	74.1	85.4	0.8677	65	9118	Skin	Fallopian_Tube	2.233075778	2.834707143	FALSE	FALSE
CHS.10337.44	CHS.10337.5	TMEM218	115	115	1	85.4	85.4	1	6703	9118	Cervix_Uteri	Fallopian_Tube	2.009883	2.834707143	FALSE	FALSE
CHS.10337.45	CHS.10337.5	TMEM218	88	115	0.7652	74.1	85.4	0.8677	65	9118	Skin	Fallopian_Tube	2.233075778	2.834707143	FALSE	FALSE
CHS.10337.46	CHS.10337.5	TMEM218	88	115	0.7652	74.1	85.4	0.8677	65	9118	Skin	Fallopian_Tube	2.233075778	2.834707143	FALSE	FALSE
CHS.10337.48	CHS.10337.5	TMEM218	80	115	0.6957	67.9	85.4	0.7951	8585	9118	Cervix_Uteri	Fallopian_Tube	1.1924075	2.834707143	FALSE	FALSE
CHS.10337.49	CHS.10337.5	TMEM218	115	115	1	85.4	85.4	1	6703	9118	Cervix_Uteri	Fallopian_Tube	2.009883	2.834707143	FALSE	FALSE
CHS.10337.50	CHS.10337.5	TMEM218	115	115	1	85.4	85.4	1	2065	9118	Uterus	Fallopian_Tube	4.720853958	2.834707143	FALSE	FALSE
CHS.10337.7	CHS.10337.5	TMEM218	45	115	0.3913	78.9	85.4	0.9239	8585	9118	Cervix_Uteri	Fallopian_Tube	1.1924075	2.834707143	FALSE	FALSE
CHS.10337.77	CHS.10337.5	TMEM218	141	115	1.2261	66.7	85.4	0.781	0	9118	-	Fallopian_Tube	0	2.834707143	FALSE	FALSE
CHS.10337.8	CHS.10337.5	TMEM218	115	115	1	85.4	85.4	1	9118	9118	Fallopian_Tube	Fallopian_Tube	2.834707143	2.834707143	FALSE	FALSE
CHS.10337.9	CHS.10337.5	TMEM218	115	115	1	85.4	85.4	1	6703	9118	Cervix_Uteri	Fallopian_Tube	2.009883	2.834707143	FALSE	FALSE
CHS.10338.10	CHS.10338.4	PKNOX2	472	472	1	54.8	54.8	1	654	6163	Vagina	Thyroid	4.4840208	16.60875466	TRUE	TRUE
CHS.10338.12	CHS.10338.4	PKNOX2	339	472	0.7182	53.8	54.8	0.9818	187	6163	Thyroid	Thyroid	5.076050333	16.60875466	TRUE	TRUE
CHS.10338.36	CHS.10338.4	PKNOX2	472	472	1	54.8	54.8	1	654	6163	Vagina	Thyroid	4.4840208	16.60875466	TRUE	TRUE
CHS.10338.37	CHS.10338.4	PKNOX2	468	472	0.9915	57.9	54.8	1.0566	28	6163	Pituitary	Thyroid	1.711086	16.60875466	TRUE	TRUE
CHS.10338.38	CHS.10338.4	PKNOX2	356	472	0.7542	59.9	54.8	1.0931	235	6163	Kidney	Thyroid	2.9933845	16.60875466	TRUE	TRUE
CHS.10338.40	CHS.10338.4	PKNOX2	443	472	0.9386	57.2	54.8	1.0438	2265	6163	Adrenal_Gland	Thyroid	1.473253944	16.60875466	FALSE	TRUE
CHS.10338.42	CHS.10338.4	PKNOX2	259	472	0.5487	65.6	54.8	1.1971	19	6163	Lung	Thyroid	2.117170667	16.60875466	FALSE	TRUE
CHS.10338.43	CHS.10338.4	PKNOX2	396	472	0.839	62.7	54.8	1.1442	29	6163	Prostate	Thyroid	2.91944	16.60875466	TRUE	TRUE
CHS.10338.44	CHS.10338.4	PKNOX2	472	472	1	54.8	54.8	1	654	6163	Vagina	Thyroid	4.4840208	16.60875466	FALSE	TRUE
CHS.10338.45	CHS.10338.4	PKNOX2	327	472	0.6928	60.9	54.8	1.1113	79	6163	Brain	Thyroid	1.5484655	16.60875466	TRUE	TRUE
CHS.10338.46	CHS.10338.4	PKNOX2	170	472	0.3602	64.2	54.8	1.1715	12	6163	Lung	Thyroid	1.188385	16.60875466	TRUE	TRUE
CHS.10338.47	CHS.10338.4	PKNOX2	472	472	1	54.8	54.8	1	654	6163	Vagina	Thyroid	4.4840208	16.60875466	FALSE	TRUE
CHS.10338.48	CHS.10338.4	PKNOX2	223	472	0.4725	55.3	54.8	1.0091	2	6163	Brain	Thyroid	0.620076	16.60875466	TRUE	TRUE
CHS.10338.49	CHS.10338.4	PKNOX2	327	472	0.6928	60.9	54.8	1.1113	79	6163	Brain	Thyroid	1.5484655	16.60875466	TRUE	TRUE
CHS.10338.5	CHS.10338.4	PKNOX2	443	472	0.9386	57.2	54.8	1.0438	2265	6163	Adrenal_Gland	Thyroid	1.473253944	16.60875466	TRUE	TRUE
CHS.10338.50	CHS.10338.4	PKNOX2	408	472	0.8644	55.4	54.8	1.0109	19	6163	Esophagus	Thyroid	1.7772	16.60875466	TRUE	TRUE
CHS.10338.51	CHS.10338.4	PKNOX2	327	472	0.6928	60.9	54.8	1.1113	79	6163	Brain	Thyroid	1.5484655	16.60875466	TRUE	TRUE
CHS.10338.52	CHS.10338.4	PKNOX2	443	472	0.9386	57.2	54.8	1.0438	2265	6163	Adrenal_Gland	Thyroid	1.473253944	16.60875466	TRUE	TRUE
CHS.10338.57	CHS.10338.4	PKNOX2	246	472	0.5212	65.3	54.8	1.1916	0	6163	-	Thyroid	0	16.60875466	FALSE	TRUE
CHS.10338.7	CHS.10338.4	PKNOX2	472	472	1	54.8	54.8	1	654	6163	Vagina	Thyroid	4.4840208	16.60875466	FALSE	TRUE
CHS.10338.8	CHS.10338.4	PKNOX2	443	472	0.9386	57.2	54.8	1.0438	2265	6163	Adrenal_Gland	Thyroid	1.473253944	16.60875466	TRUE	TRUE
CHS.10338.9	CHS.10338.4	PKNOX2	356	472	0.7542	59.9	54.8	1.0931	235	6163	Kidney	Thyroid	2.9933845	16.60875466	TRUE	TRUE
CHS.10343.18	CHS.10343.2	FEZ1	104	392	0.2653	67.8	66.5	1.0195	9630	9515	Brain	Brain	48.45114351	329.1726873	TRUE	TRUE
CHS.10346.1	CHS.10346.3	EI24	262	340	0.7706	65.2	82.3	0.7922	9428	9739	Muscle	Bone_Marrow	27.81399288	81.15365882	TRUE	TRUE
CHS.10346.10	CHS.10346.3	EI24	340	340	1	82.3	82.3	1	3351	9739	Bone_Marrow	Bone_Marrow	28.792113	81.15365882	TRUE	TRUE
CHS.10346.11	CHS.10346.3	EI24	262	340	0.7706	65.2	82.3	0.7922	9428	9739	Muscle	Bone_Marrow	27.81399288	81.15365882	FALSE	TRUE
CHS.10346.4	CHS.10346.3	EI24	326	340	0.9588	81.6	82.3	0.9915	6870	9739	Bone_Marrow	Bone_Marrow	4.10406051	81.15365882	TRUE	TRUE
CHS.10346.6	CHS.10346.3	EI24	167	340	0.4912	75.6	82.3	0.9186	5850	9739	Kidney	Bone_Marrow	0.553410519	81.15365882	TRUE	TRUE
CHS.10347.1	CHS.10347.3	STT3A	375	705	0.5319	85.4	85.4	1	1611	9758	Cervix_Uteri	Bone_Marrow	4.10832	78.27163765	FALSE	FALSE
CHS.10347.2	CHS.10347.3	STT3A	705	705	1	85.4	85.4	1	2075	9758	Cervix_Uteri	Bone_Marrow	3.133405	78.27163765	FALSE	FALSE
CHS.10347.4	CHS.10347.3	STT3A	613	705	0.8695	84.6	85.4	0.9906	6612	9758	Bone_Marrow	Bone_Marrow	1.56709887	78.27163765	FALSE	FALSE
CHS.10348.10	CHS.10348.3	CHEK1	476	476	1	77.7	77.7	1	570	3062	Skin	Bone_Marrow	2.097181163	10.16762495	FALSE	TRUE
CHS.10348.12	CHS.10348.3	CHEK1	476	476	1	77.7	77.7	1	2155	3062	Bone_Marrow	Bone_Marrow	10.5521598	10.16762495	FALSE	TRUE
CHS.10348.2	CHS.10348.3	CHEK1	375	476	0.7878	73.7	77.7	0.9485	10	3062	Small_Intestine	Bone_Marrow	1.12126	10.16762495	FALSE	TRUE
CHS.10348.4	CHS.10348.3	CHEK1	442	476	0.9286	74.4	77.7	0.9575	1638	3062	Bone_Marrow	Bone_Marrow	1.589102921	10.16762495	TRUE	TRUE
CHS.10348.5	CHS.10348.3	CHEK1	492	476	1.0336	73.7	77.7	0.9485	1751	3062	Bone_Marrow	Bone_Marrow	2.972822782	10.16762495	TRUE	TRUE
CHS.10348.6	CHS.10348.3	CHEK1	476	476	1	77.7	77.7	1	2155	3062	Bone_Marrow	Bone_Marrow	10.5521598	10.16762495	TRUE	TRUE
CHS.10348.9	CHS.10348.3	CHEK1	382	476	0.8025	73.4	77.7	0.9447	33	3062	Vagina	Bone_Marrow	1.82071	10.16762495	TRUE	TRUE
CHS.10349.3	CHS.10349.6	ACRV1	195	265	0.7358	66.4	60.3	1.1012	314	480	Testis	Testis	27.00080495	51.17830996	TRUE	TRUE
CHS.10349.4	CHS.10349.6	ACRV1	210	265	0.7925	65.2	60.3	1.0813	299	480	Testis	Testis	15.17627403	51.17830996	TRUE	TRUE
CHS.10349.5	CHS.10349.6	ACRV1	246	265	0.9283	60.9	60.3	1.01	316	480	Testis	Testis	21.69620108	51.17830996	TRUE	TRUE
CHS.10349.9	CHS.10349.6	ACRV1	225	265	0.8491	49.9	60.3	0.8275	48	480	Testis	Testis	2.870974367	51.17830996	TRUE	TRUE
CHS.10353.1	CHS.10353.2	PATE3	86	98	0.8776	88.1	88.8	0.9921	17	20	Prostate	Prostate	1.36191	5.2976	TRUE	TRUE
CHS.10355.1	CHS.10355.3	PATE4	61	98	0.6224	85.9	88.8	0.9673	11	4	Prostate	Prostate	59.01843	186.1634	FALSE	FALSE
CHS.10357.1	CHS.10357.6	HYLS1	299	299	1	61.9	61.9	1	3354	6496	Testis	Testis	5.187535263	10.610946	FALSE	TRUE
CHS.10357.11	CHS.10357.6	HYLS1	299	299	1	61.9	61.9	1	3354	6496	Testis	Testis	5.187535263	10.610946	FALSE	TRUE
CHS.10358.11	CHS.10358.4	PUS3	273	481	0.5676	81.4	82.5	0.9867	7382	8115	Bone_Marrow	Bone_Marrow	5.253684314	15.2936244	FALSE	FALSE
CHS.10358.9	CHS.10358.4	PUS3	176	481	0.3659	81.7	82.5	0.9903	1951	8115	Skin	Bone_Marrow	2.990205094	15.2936244	FALSE	FALSE
CHS.10359.1	CHS.10359.6	DDX25	369	483	0.764	89.9	82.5	1.0897	1061	2122	Kidney	Testis	1.809530833	27.25219338	TRUE	TRUE
CHS.10359.19	CHS.10359.6	DDX25	352	483	0.7288	91.2	82.5	1.1055	197	2122	Testis	Testis	5.936755625	27.25219338	TRUE	TRUE
CHS.10359.8	CHS.10359.6	DDX25	465	483	0.9627	82.6	82.5	1.0012	38	2122	Pituitary	Testis	4.27631	27.25219338	TRUE	TRUE
CHS.10361.14	CHS.10361.15	VSIG10L2	368	793	0.4641	82.2	80.9	1.0161	130	0	Breast	-	9.5256	0	TRUE	TRUE
CHS.10361.2	CHS.10361.15	VSIG10L2	271	793	0.3417	78.3	80.9	0.9679	38	0	Vagina	-	4.7586975	0	TRUE	TRUE
CHS.10361.4	CHS.10361.15	VSIG10L2	278	793	0.3506	88	80.9	1.0878	334	0	Uterus	-	11.6701	0	TRUE	TRUE
CHS.10361.6	CHS.10361.15	VSIG10L2	181	793	0.2282	86.5	80.9	1.0692	165	0	Salivary_Gland	-	5.73775	0	TRUE	TRUE
CHS.10367.16	CHS.10367.5	FAM118B	275	351	0.7835	75.8	81.4	0.9312	3	9642	Lung	Testis	1.22908	17.58284174	FALSE	FALSE
CHS.10367.4	CHS.10367.5	FAM118B	350	351	0.9972	81.7	81.4	1.0037	7375	9642	Testis	Testis	9.113259588	17.58284174	FALSE	FALSE
CHS.10367.6	CHS.10367.5	FAM118B	350	351	0.9972	81.7	81.4	1.0037	7375	9642	Testis	Testis	9.113259588	17.58284174	TRUE	FALSE
CHS.10368.1	CHS.10368.2	RPUSD4	346	377	0.9178	83.5	84.5	0.9882	9061	9742	Muscle	Muscle	6.183077305	68.01293669	TRUE	TRUE
CHS.10368.7	CHS.10368.2	RPUSD4	190	377	0.504	80.3	84.5	0.9503	2030	9742	Uterus	Muscle	2.9576075	68.01293669	TRUE	TRUE
CHS.10368.8	CHS.10368.2	RPUSD4	376	377	0.9973	83.1	84.5	0.9834	42	9742	Uterus	Muscle	2.18928	68.01293669	TRUE	TRUE
CHS.10369.3	CHS.10369.4	SRPRA	610	638	0.9561	71.4	72.9	0.9794	8611	9777	Uterus	Pituitary	5.280229579	138.4748331	FALSE	FALSE
CHS.10370.14	CHS.10370.1	FOXRED1	316	486	0.6502	95.5	89.4	1.0682	7085	9624	Brain	Bone_Marrow	3.778547677	33.11282157	FALSE	TRUE
CHS.10370.17	CHS.10370.1	FOXRED1	275	486	0.5658	94.8	89.4	1.0604	1322	9624	Ovary	Bone_Marrow	4.752499333	33.11282157	TRUE	TRUE
CHS.10370.2	CHS.10370.1	FOXRED1	316	486	0.6502	95.5	89.4	1.0682	7085	9624	Brain	Bone_Marrow	3.778547677	33.11282157	TRUE	TRUE
CHS.10370.25	CHS.10370.1	FOXRED1	451	486	0.928	83.5	89.4	0.934	4	9624	Bone_Marrow	Bone_Marrow	1.36956	33.11282157	TRUE	TRUE
CHS.10370.6	CHS.10370.1	FOXRED1	485	486	0.9979	89.7	89.4	1.0034	150	9624	Bone_Marrow	Bone_Marrow	3.536083077	33.11282157	TRUE	TRUE
CHS.10370.8	CHS.10370.1	FOXRED1	472	486	0.9712	91.6	89.4	1.0246	3254	9624	Bone_Marrow	Bone_Marrow	13.23861482	33.11282157	FALSE	TRUE
CHS.10371.11	CHS.10371.14	TIRAP	235	221	1.0633	68.1	74.2	0.9178	3801	8561	Fallopian_Tube	Uterus	1.082632667	5.887752085	TRUE	TRUE
CHS.10371.12	CHS.10371.14	TIRAP	235	221	1.0633	68.1	74.2	0.9178	3801	8561	Fallopian_Tube	Uterus	1.082632667	5.887752085	TRUE	TRUE
CHS.10371.13	CHS.10371.14	TIRAP	221	221	1	74.2	74.2	1	3098	8561	Bladder	Uterus	2.60191	5.887752085	TRUE	TRUE
CHS.10371.6	CHS.10371.14	TIRAP	221	221	1	74.2	74.2	1	1283	8561	Fallopian_Tube	Uterus	3.56358	5.887752085	TRUE	TRUE
CHS.10373.12	CHS.10373.2	DCPS	244	337	0.724	86.4	86.9	0.9942	275	9759	Small_Intestine	Bladder	2.866475333	8.76865	FALSE	TRUE
CHS.10373.19	CHS.10373.2	DCPS	186	337	0.5519	89.7	86.9	1.0322	42	9759	Liver	Bladder	2.910291	8.76865	TRUE	TRUE
CHS.10373.21	CHS.10373.2	DCPS	255	337	0.7567	83.6	86.9	0.962	103	9759	Cervix_Uteri	Bladder	5.38549	8.76865	TRUE	TRUE
CHS.10373.3	CHS.10373.2	DCPS	344	337	1.0208	85.3	86.9	0.9816	286	9759	Testis	Bladder	3.0744495	8.76865	TRUE	TRUE
CHS.10375.10	CHS.10375.1	ST3GAL4	333	333	1	89.3	89.3	1	8722	9701	Ovary	Ovary	20.0037	93.47503036	TRUE	TRUE
CHS.10375.20	CHS.10375.1	ST3GAL4	333	333	1	89.3	89.3	1	8722	9701	Ovary	Ovary	20.0037	93.47503036	TRUE	TRUE
CHS.10375.25	CHS.10375.1	ST3GAL4	332	333	0.997	88.8	89.3	0.9944	9744	9701	Bladder	Ovary	0.511174545	93.47503036	TRUE	TRUE
CHS.10375.33	CHS.10375.1	ST3GAL4	264	333	0.7928	85.9	89.3	0.9619	1	9701	Brain	Ovary	0.9055	93.47503036	TRUE	TRUE
CHS.10375.35	CHS.10375.1	ST3GAL4	331	333	0.994	70.2	89.3	0.7861	5	9701	Colon	Ovary	1.11113	93.47503036	FALSE	TRUE
CHS.10375.36	CHS.10375.1	ST3GAL4	350	333	1.0511	68.4	89.3	0.766	8	9701	Ovary	Ovary	4.34796	93.47503036	TRUE	TRUE
CHS.10375.37	CHS.10375.1	ST3GAL4	354	333	1.0631	87.4	89.3	0.9787	74	9701	Colon	Ovary	2.69569	93.47503036	FALSE	TRUE
CHS.10375.40	CHS.10375.1	ST3GAL4	354	333	1.0631	87.4	89.3	0.9787	74	9701	Colon	Ovary	2.69569	93.47503036	TRUE	TRUE
CHS.10375.6	CHS.10375.1	ST3GAL4	329	333	0.988	90.1	89.3	1.009	9205	9701	Ovary	Ovary	20.40763795	93.47503036	TRUE	TRUE
CHS.10375.7	CHS.10375.1	ST3GAL4	329	333	0.988	90.1	89.3	1.009	9205	9701	Ovary	Ovary	20.40763795	93.47503036	TRUE	TRUE
CHS.10376.1	CHS.10376.15	KIRREL3	766	778	0.9846	71.9	71.1	1.0113	250	2011	Brain	Brain	3.88875722	9.341066808	TRUE	TRUE
CHS.10376.11	CHS.10376.15	KIRREL3	778	778	1	71.1	71.1	1	354	2011	Brain	Brain	4.908711621	9.341066808	TRUE	TRUE
CHS.10376.12	CHS.10376.15	KIRREL3	791	778	1.0167	70.4	71.1	0.9902	7	2011	Brain	Brain	1.189161857	9.341066808	TRUE	TRUE
CHS.10376.14	CHS.10376.15	KIRREL3	766	778	0.9846	71.9	71.1	1.0113	1950	2011	Brain	Brain	7.232794493	9.341066808	TRUE	TRUE
CHS.10376.18	CHS.10376.15	KIRREL3	600	778	0.7712	83.8	71.1	1.1786	2033	2011	Vagina	Brain	0.503324333	9.341066808	TRUE	TRUE
CHS.10376.32	CHS.10376.15	KIRREL3	614	778	0.7892	82.5	71.1	1.1603	54	2011	Brain	Brain	1.901803851	9.341066808	TRUE	TRUE
CHS.10376.5	CHS.10376.15	KIRREL3	772	778	0.9923	71.4	71.1	1.0042	34	2011	Brain	Brain	1.401428485	9.341066808	TRUE	TRUE
CHS.10376.6	CHS.10376.15	KIRREL3	784	778	1.0077	70.6	71.1	0.993	34	2011	Brain	Brain	1.673849941	9.341066808	TRUE	TRUE
CHS.104.11	CHS.104.4	ATAD3A	438	586	0.7474	80.9	79	1.0241	1	9721	Adipose_Tissue	Bone_Marrow	1.08061	71.27514158	FALSE	FALSE
CHS.104.12	CHS.104.4	ATAD3A	612	586	1.0444	76.5	79	0.9684	9	9721	Nerve	Bone_Marrow	5.06548	71.27514158	FALSE	FALSE
CHS.104.2	CHS.104.4	ATAD3A	491	586	0.8379	78.1	79	0.9886	51	9721	Nerve	Bone_Marrow	4.48379	71.27514158	FALSE	FALSE
CHS.104.3	CHS.104.4	ATAD3A	634	586	1.0819	77.4	79	0.9797	457	9721	Pituitary	Bone_Marrow	13.11306	71.27514158	FALSE	FALSE
CHS.104.5	CHS.104.4	ATAD3A	532	586	0.9078	82	79	1.038	1880	9721	Pituitary	Bone_Marrow	3.841445016	71.27514158	FALSE	FALSE
CHS.104.6	CHS.104.4	ATAD3A	507	586	0.8652	83.6	79	1.0582	2975	9721	Testis	Bone_Marrow	1.931972144	71.27514158	FALSE	FALSE
CHS.10406.5	CHS.10406.7	ETS1	225	485	0.4639	69.4	59	1.1763	4005	3671	Cervix_Uteri	Adipose_Tissue	1.4972462	9.229943054	FALSE	FALSE
CHS.10406.6	CHS.10406.7	ETS1	441	485	0.9093	61.3	59	1.039	9499	3671	Spleen	Adipose_Tissue	104.4345492	9.229943054	FALSE	FALSE
CHS.10406.9	CHS.10406.7	ETS1	354	485	0.7299	66	59	1.1186	6461	3671	Lung	Adipose_Tissue	3.209009764	9.229943054	FALSE	FALSE
CHS.10414.13	CHS.10414.15	FLI1	419	452	0.927	60.4	58.1	1.0396	438	9105	Spleen	Spleen	8.22401395	50.52392068	TRUE	TRUE
CHS.10414.14	CHS.10414.15	FLI1	386	452	0.854	62.6	58.1	1.0775	3498	9105	Spleen	Spleen	18.88180029	50.52392068	TRUE	TRUE
CHS.10414.3	CHS.10414.15	FLI1	259	452	0.573	66	58.1	1.136	3368	9105	Spleen	Spleen	0.390973879	50.52392068	TRUE	TRUE
CHS.10416.2	CHS.10416.4	KCNJ1	391	372	1.0511	83.4	83.9	0.994	239	179	Kidney	Kidney	3.407053344	6.412368909	FALSE	FALSE
CHS.10416.3	CHS.10416.4	KCNJ1	372	372	1	83.9	83.9	1	179	179	Kidney	Kidney	6.412368909	6.412368909	FALSE	FALSE
CHS.10416.5	CHS.10416.4	KCNJ1	389	372	1.0457	82.1	83.9	0.9785	68	179	Brain	Kidney	1.431641029	6.412368909	FALSE	FALSE
CHS.10416.6	CHS.10416.4	KCNJ1	372	372	1	83.9	83.9	1	179	179	Kidney	Kidney	6.412368909	6.412368909	FALSE	FALSE
CHS.10421.14	CHS.10421.2	KCNJ5	419	419	1	78.1	78.1	1	91	3208	Adrenal_Gland	Adrenal_Gland	10.47717619	53.35011019	FALSE	FALSE
CHS.10421.15	CHS.10421.2	KCNJ5	330	419	0.7876	73.9	78.1	0.9462	808	3208	Pituitary	Adrenal_Gland	3.422811333	53.35011019	FALSE	FALSE
CHS.10423.1	CHS.10423.8	TP53AIP1	86	124	0.6935	60.7	53.4	1.1367	1441	1462	Ovary	Blood_Vessel	2.68912	1.84288	FALSE	FALSE
CHS.10423.4	CHS.10423.8	TP53AIP1	108	124	0.871	53.6	53.4	1.0037	864	1462	Cervix_Uteri	Blood_Vessel	5.24994	1.84288	FALSE	FALSE
CHS.10423.7	CHS.10423.8	TP53AIP1	120	124	0.9677	53.3	53.4	0.9981	1362	1462	Fallopian_Tube	Blood_Vessel	1.0882805	1.84288	FALSE	FALSE
CHS.10423.9	CHS.10423.8	TP53AIP1	108	124	0.871	53.6	53.4	1.0037	2149	1462	Cervix_Uteri	Blood_Vessel	9.078126667	1.84288	FALSE	FALSE
CHS.10427.2	CHS.10427.10	BARX2	134	279	0.4803	68.2	59.8	1.1405	797	3376	Esophagus	Esophagus	2.79548351	135.2456556	TRUE	TRUE
CHS.10427.5	CHS.10427.10	BARX2	134	279	0.4803	68.2	59.8	1.1405	670	3376	Cervix_Uteri	Esophagus	10.3865	135.2456556	FALSE	TRUE
CHS.10427.9	CHS.10427.10	BARX2	94	279	0.3369	63.6	59.8	1.0635	356	3376	Esophagus	Esophagus	2.408431763	135.2456556	TRUE	TRUE
CHS.10435.1	CHS.10435.5	TMEM45B	275	275	1	89.2	89.2	1	1721	3754	Small_Intestine	Small_Intestine	28.17215733	64.06920909	FALSE	FALSE
CHS.10435.10	CHS.10435.5	TMEM45B	206	275	0.7491	81.7	89.2	0.9159	62	3754	Breast	Small_Intestine	3.3366	64.06920909	FALSE	FALSE
CHS.10435.13	CHS.10435.5	TMEM45B	241	275	0.8764	94.2	89.2	1.0561	4	3754	Blood	Small_Intestine	1.592275333	64.06920909	FALSE	FALSE
CHS.10435.2	CHS.10435.5	TMEM45B	275	275	1	89.2	89.2	1	1721	3754	Small_Intestine	Small_Intestine	28.17215733	64.06920909	FALSE	FALSE
CHS.10435.3	CHS.10435.5	TMEM45B	275	275	1	89.2	89.2	1	1721	3754	Small_Intestine	Small_Intestine	28.17215733	64.06920909	FALSE	FALSE
CHS.10435.4	CHS.10435.5	TMEM45B	275	275	1	89.2	89.2	1	1721	3754	Small_Intestine	Small_Intestine	28.17215733	64.06920909	FALSE	FALSE
CHS.10436.11	CHS.10436.13	NFRKB	1299	1299	1	54.4	54.4	1	3873	5890	Thyroid	Thyroid	14.97917317	12.29493147	TRUE	FALSE
CHS.10442.1	CHS.10442.2	APLP2	763	751	1.016	67.2	68.1	0.9868	9782	9786	Brain	Lung	127.4565117	171.0772558	TRUE	TRUE
CHS.10442.10	CHS.10442.2	APLP2	539	751	0.7177	67.3	68.1	0.9883	0	9786	-	Lung	0	171.0772558	TRUE	TRUE
CHS.10442.12	CHS.10442.2	APLP2	607	751	0.8083	67.8	68.1	0.9956	0	9786	-	Lung	0	171.0772558	TRUE	TRUE
CHS.10442.14	CHS.10442.2	APLP2	595	751	0.7923	68.6	68.1	1.0073	0	9786	-	Lung	0	171.0772558	TRUE	TRUE
CHS.10442.16	CHS.10442.2	APLP2	756	751	1.0067	67.3	68.1	0.9883	1	9786	Skin	Lung	2.7725	171.0772558	TRUE	TRUE
CHS.10442.17	CHS.10442.2	APLP2	761	751	1.0133	66.6	68.1	0.978	9014	9786	Blood_Vessel	Lung	8.585315864	171.0772558	TRUE	TRUE
CHS.10442.22	CHS.10442.2	APLP2	644	751	0.8575	68.8	68.1	1.0103	188	9786	Thyroid	Lung	5.98502	171.0772558	TRUE	TRUE
CHS.10442.23	CHS.10442.2	APLP2	700	751	0.9321	69.6	68.1	1.022	163	9786	Brain	Lung	10.04940522	171.0772558	TRUE	TRUE
CHS.10442.24	CHS.10442.2	APLP2	597	751	0.7949	74	68.1	1.0866	8	9786	Nerve	Lung	6.3715	171.0772558	TRUE	TRUE
CHS.10442.25	CHS.10442.2	APLP2	655	751	0.8722	65.9	68.1	0.9677	3	9786	Brain	Lung	3.952695	171.0772558	TRUE	TRUE
CHS.10442.26	CHS.10442.2	APLP2	730	751	0.972	65.9	68.1	0.9677	1	9786	Brain	Lung	2.44728	171.0772558	TRUE	TRUE
CHS.10442.27	CHS.10442.2	APLP2	718	751	0.9561	65.5	68.1	0.9618	4	9786	Brain	Lung	2.756843333	171.0772558	TRUE	TRUE
CHS.10442.29	CHS.10442.2	APLP2	427	751	0.5686	70.1	68.1	1.0294	0	9786	-	Lung	0	171.0772558	FALSE	TRUE
CHS.10442.3	CHS.10442.2	APLP2	695	751	0.9254	67.8	68.1	0.9956	9786	9786	Thyroid	Lung	253.6872672	171.0772558	TRUE	TRUE
CHS.10442.30	CHS.10442.2	APLP2	315	751	0.4194	69.2	68.1	1.0162	0	9786	-	Lung	0	171.0772558	TRUE	TRUE
CHS.10442.31	CHS.10442.2	APLP2	455	751	0.6059	73.7	68.1	1.0822	0	9786	-	Lung	0	171.0772558	TRUE	TRUE
CHS.10442.32	CHS.10442.2	APLP2	347	751	0.4621	70.1	68.1	1.0294	0	9786	-	Lung	0	171.0772558	TRUE	TRUE
CHS.10442.33	CHS.10442.2	APLP2	700	751	0.9321	66.6	68.1	0.978	0	9786	-	Lung	0	171.0772558	FALSE	TRUE
CHS.10442.34	CHS.10442.2	APLP2	761	751	1.0133	67.4	68.1	0.9897	0	9786	-	Lung	0	171.0772558	TRUE	TRUE
CHS.10442.35	CHS.10442.2	APLP2	726	751	0.9667	69.5	68.1	1.0206	0	9786	-	Lung	0	171.0772558	TRUE	TRUE
CHS.10442.36	CHS.10442.2	APLP2	761	751	1.0133	66.5	68.1	0.9765	0	9786	-	Lung	0	171.0772558	TRUE	TRUE
CHS.10442.37	CHS.10442.2	APLP2	749	751	0.9973	67.8	68.1	0.9956	0	9786	-	Lung	0	171.0772558	TRUE	TRUE
CHS.10442.38	CHS.10442.2	APLP2	701	751	0.9334	65.1	68.1	0.9559	0	9786	-	Lung	0	171.0772558	FALSE	TRUE
CHS.10442.39	CHS.10442.2	APLP2	668	751	0.8895	65.6	68.1	0.9633	0	9786	-	Lung	0	171.0772558	FALSE	TRUE
CHS.10442.4	CHS.10442.2	APLP2	522	751	0.6951	71.7	68.1	1.0529	8223	9786	Thyroid	Lung	1.332998762	171.0772558	TRUE	TRUE
CHS.10442.40	CHS.10442.2	APLP2	566	751	0.7537	69.2	68.1	1.0162	0	9786	-	Lung	0	171.0772558	TRUE	TRUE
CHS.10442.41	CHS.10442.2	APLP2	719	751	0.9574	65.9	68.1	0.9677	0	9786	-	Lung	0	171.0772558	TRUE	TRUE
CHS.10442.42	CHS.10442.2	APLP2	534	751	0.7111	70.8	68.1	1.0396	0	9786	-	Lung	0	171.0772558	TRUE	TRUE
CHS.10442.43	CHS.10442.2	APLP2	611	751	0.8136	63.8	68.1	0.9369	0	9786	-	Lung	0	171.0772558	TRUE	TRUE
CHS.10442.44	CHS.10442.2	APLP2	599	751	0.7976	64.4	68.1	0.9457	0	9786	-	Lung	0	171.0772558	TRUE	TRUE
CHS.10442.45	CHS.10442.2	APLP2	548	751	0.7297	65.7	68.1	0.9648	0	9786	-	Lung	0	171.0772558	TRUE	TRUE
CHS.10442.46	CHS.10442.2	APLP2	705	751	0.9387	66.8	68.1	0.9809	0	9786	-	Lung	0	171.0772558	TRUE	TRUE
CHS.10442.47	CHS.10442.2	APLP2	693	751	0.9228	67.4	68.1	0.9897	0	9786	-	Lung	0	171.0772558	TRUE	TRUE
CHS.10442.48	CHS.10442.2	APLP2	649	751	0.8642	65.7	68.1	0.9648	0	9786	-	Lung	0	171.0772558	TRUE	TRUE
CHS.10442.49	CHS.10442.2	APLP2	637	751	0.8482	66.4	68.1	0.975	0	9786	-	Lung	0	171.0772558	TRUE	TRUE
CHS.10442.5	CHS.10442.2	APLP2	517	751	0.6884	64.9	68.1	0.953	0	9786	-	Lung	0	171.0772558	TRUE	TRUE
CHS.10442.6	CHS.10442.2	APLP2	551	751	0.7337	65.9	68.1	0.9677	5509	9786	Thyroid	Lung	0.91222696	171.0772558	TRUE	TRUE
CHS.10442.7	CHS.10442.2	APLP2	707	751	0.9414	67	68.1	0.9838	495	9786	Brain	Lung	17.42611748	171.0772558	TRUE	TRUE
CHS.10443.19	CHS.10443.1	ST14	834	855	0.9754	82.8	81.9	1.011	16	5062	Lung	Colon	2.21046	155.3065476	TRUE	TRUE
CHS.10446.10	CHS.10446.6	ZBTB44	474	570	0.8316	55.9	55.7	1.0036	178	7658	Nerve	Testis	1.567498667	4.307250348	TRUE	FALSE
CHS.10446.12	CHS.10446.6	ZBTB44	598	570	1.0491	53.7	55.7	0.9641	143	7658	Nerve	Testis	2.132536667	4.307250348	FALSE	FALSE
CHS.10446.14	CHS.10446.6	ZBTB44	616	570	1.0807	53.8	55.7	0.9659	9363	7658	Testis	Testis	9.493680676	4.307250348	FALSE	FALSE
CHS.10446.15	CHS.10446.6	ZBTB44	199	570	0.3491	50.8	55.7	0.912	53	7658	Pituitary	Testis	3.32164	4.307250348	FALSE	FALSE
CHS.10446.35	CHS.10446.6	ZBTB44	453	570	0.7947	58	55.7	1.0413	2077	7658	Testis	Testis	3.631103333	4.307250348	FALSE	FALSE
CHS.10446.39	CHS.10446.6	ZBTB44	530	570	0.9298	56.8	55.7	1.0197	20	7658	Testis	Testis	1.458527714	4.307250348	FALSE	FALSE
CHS.10446.4	CHS.10446.6	ZBTB44	474	570	0.8316	55.9	55.7	1.0036	178	7658	Nerve	Testis	1.567498667	4.307250348	FALSE	FALSE
CHS.10446.40	CHS.10446.6	ZBTB44	467	570	0.8193	56.6	55.7	1.0162	33	7658	Testis	Testis	4.401746667	4.307250348	FALSE	FALSE
CHS.10446.5	CHS.10446.6	ZBTB44	453	570	0.7947	58	55.7	1.0413	9374	7658	Testis	Testis	4.480507068	4.307250348	FALSE	FALSE
CHS.10446.8	CHS.10446.6	ZBTB44	435	570	0.7632	58.8	55.7	1.0557	993	7658	Ovary	Testis	1.485065517	4.307250348	FALSE	FALSE
CHS.10458.13	CHS.10458.18	SNX19	723	992	0.7288	59.1	59.2	0.9983	2250	9732	Bladder	Bladder	8.64036	21.57404	FALSE	TRUE
CHS.10458.16	CHS.10458.18	SNX19	287	992	0.2893	56.2	59.2	0.9493	43	9732	Thyroid	Bladder	7.347303333	21.57404	TRUE	TRUE
CHS.10458.17	CHS.10458.18	SNX19	372	992	0.375	62.5	59.2	1.0557	9374	9732	Testis	Bladder	22.96222908	21.57404	TRUE	TRUE
CHS.10458.3	CHS.10458.18	SNX19	952	992	0.9597	58.7	59.2	0.9916	124	9732	Thyroid	Bladder	2.90709	21.57404	TRUE	TRUE
CHS.10458.32	CHS.10458.18	SNX19	880	992	0.8871	55.3	59.2	0.9341	17	9732	Testis	Bladder	1.26144	21.57404	TRUE	TRUE
CHS.10458.4	CHS.10458.18	SNX19	417	992	0.4204	57.4	59.2	0.9696	802	9732	Uterus	Bladder	5.413512923	21.57404	TRUE	TRUE
CHS.10458.45	CHS.10458.18	SNX19	435	992	0.4385	61.9	59.2	1.0456	573	9732	Testis	Bladder	2.573132938	21.57404	TRUE	TRUE
CHS.10458.47	CHS.10458.18	SNX19	803	992	0.8095	57.3	59.2	0.9679	3351	9732	Testis	Bladder	0.25659654	21.57404	TRUE	TRUE
CHS.10458.48	CHS.10458.18	SNX19	232	992	0.2339	68.6	59.2	1.1588	0	9732	-	Bladder	0	21.57404	TRUE	TRUE
CHS.10458.55	CHS.10458.18	SNX19	314	992	0.3165	61.5	59.2	1.0389	2250	9732	Bladder	Bladder	8.64036	21.57404	FALSE	TRUE
CHS.10458.56	CHS.10458.18	SNX19	332	992	0.3347	61.5	59.2	1.0389	2	9732	Brain	Bladder	1.05892	21.57404	TRUE	TRUE
CHS.10458.8	CHS.10458.18	SNX19	907	992	0.9143	54.4	59.2	0.9189	1525	9732	Testis	Bladder	8.812936333	21.57404	TRUE	TRUE
CHS.10467.10	CHS.10467.7	NTM	346	355	0.9746	82.5	82.8	0.9964	82	1555	Brain	Lung	2.978265263	11.01237923	TRUE	TRUE
CHS.10467.15	CHS.10467.7	NTM	344	355	0.969	84.1	82.8	1.0157	3002	1555	Brain	Lung	21.14544187	11.01237923	TRUE	TRUE
CHS.10467.2	CHS.10467.7	NTM	270	355	0.7606	85.1	82.8	1.0278	7	1555	Brain	Lung	4.620207143	11.01237923	FALSE	TRUE
CHS.10467.28	CHS.10467.7	NTM	229	355	0.6451	90.6	82.8	1.0942	8	1555	Brain	Lung	3.46398925	11.01237923	FALSE	TRUE
CHS.10467.30	CHS.10467.7	NTM	303	355	0.8535	88.3	82.8	1.0664	130	1555	Brain	Lung	8.896594522	11.01237923	TRUE	TRUE
CHS.10467.32	CHS.10467.7	NTM	325	355	0.9155	85.5	82.8	1.0326	28	1555	Brain	Lung	5.204646588	11.01237923	TRUE	TRUE
CHS.10467.33	CHS.10467.7	NTM	316	355	0.8901	86.5	82.8	1.0447	5667	1555	Nerve	Lung	0.380633432	11.01237923	TRUE	TRUE
CHS.10467.34	CHS.10467.7	NTM	355	355	1	82.8	82.8	1	5376	1555	Nerve	Lung	9.805882473	11.01237923	TRUE	TRUE
CHS.10467.35	CHS.10467.7	NTM	344	355	0.969	84.2	82.8	1.0169	4261	1555	Brain	Lung	18.46208304	11.01237923	TRUE	TRUE
CHS.10467.39	CHS.10467.7	NTM	385	355	1.0845	78.7	82.8	0.9505	80	1555	Nerve	Lung	2.937458596	11.01237923	FALSE	TRUE
CHS.10467.4	CHS.10467.7	NTM	367	355	1.0338	81.5	82.8	0.9843	1365	1555	Brain	Lung	8.643592683	11.01237923	TRUE	TRUE
CHS.10467.40	CHS.10467.7	NTM	373	355	1.0507	80	82.8	0.9662	655	1555	Nerve	Lung	6.157992079	11.01237923	TRUE	TRUE
CHS.10467.41	CHS.10467.7	NTM	270	355	0.7606	85.7	82.8	1.035	8	1555	Brain	Lung	2.570343125	11.01237923	FALSE	TRUE
CHS.10467.42	CHS.10467.7	NTM	367	355	1.0338	81.5	82.8	0.9843	1090	1555	Nerve	Lung	4.546956255	11.01237923	TRUE	TRUE
CHS.10467.50	CHS.10467.7	NTM	126	355	0.3549	70.7	82.8	0.8539	19	1555	Brain	Lung	1.698586842	11.01237923	FALSE	TRUE
CHS.10467.56	CHS.10467.7	NTM	275	355	0.7746	92.8	82.8	1.1208	29	1555	Brain	Lung	5.099926667	11.01237923	TRUE	TRUE
CHS.10467.57	CHS.10467.7	NTM	356	355	1.0028	82.9	82.8	1.0012	8	1555	Brain	Lung	3.2319565	11.01237923	TRUE	TRUE
CHS.10467.59	CHS.10467.7	NTM	326	355	0.9183	85	82.8	1.0266	73	1555	Vagina	Lung	8.04446	11.01237923	TRUE	TRUE
CHS.10467.6	CHS.10467.7	NTM	373	355	1.0507	80.4	82.8	0.971	215	1555	Lung	Lung	6.920973425	11.01237923	FALSE	TRUE
CHS.10467.60	CHS.10467.7	NTM	385	355	1.0845	79.1	82.8	0.9553	101	1555	Lung	Lung	3.387973324	11.01237923	FALSE	TRUE
CHS.10467.61	CHS.10467.7	NTM	376	355	1.0592	78.4	82.8	0.9469	1	1555	Brain	Lung	1.91461	11.01237923	FALSE	TRUE
CHS.10467.67	CHS.10467.7	NTM	275	355	0.7746	92.8	82.8	1.1208	29	1555	Brain	Lung	5.099926667	11.01237923	FALSE	TRUE
CHS.10467.68	CHS.10467.7	NTM	336	355	0.9465	84.7	82.8	1.0229	48	1555	Brain	Lung	2.247623286	11.01237923	TRUE	TRUE
CHS.10467.71	CHS.10467.7	NTM	356	355	1.0028	82.5	82.8	0.9964	5	1555	Heart	Lung	1.451803333	11.01237923	TRUE	TRUE
CHS.10467.80	CHS.10467.7	NTM	364	355	1.0254	79.7	82.8	0.9626	0	1555	-	Lung	0	11.01237923	TRUE	TRUE
CHS.10467.81	CHS.10467.7	NTM	429	355	1.2085	72.4	82.8	0.8744	0	1555	-	Lung	0	11.01237923	FALSE	TRUE
CHS.10467.82	CHS.10467.7	NTM	338	355	0.9521	77.7	82.8	0.9384	0	1555	-	Lung	0	11.01237923	FALSE	TRUE
CHS.10467.87	CHS.10467.7	NTM	176	355	0.4958	76	82.8	0.9179	0	1555	-	Lung	0	11.01237923	FALSE	TRUE
CHS.10467.89	CHS.10467.7	NTM	217	355	0.6113	72.5	82.8	0.8756	0	1555	-	Lung	0	11.01237923	FALSE	TRUE
CHS.10467.9	CHS.10467.7	NTM	335	355	0.9437	83.9	82.8	1.0133	18	1555	Brain	Lung	4.311554833	11.01237923	TRUE	TRUE
CHS.10467.91	CHS.10467.7	NTM	138	355	0.3887	66.8	82.8	0.8068	0	1555	-	Lung	0	11.01237923	FALSE	TRUE
CHS.10467.95	CHS.10467.7	NTM	339	355	0.9549	76.2	82.8	0.9203	0	1555	-	Lung	0	11.01237923	FALSE	TRUE
CHS.10467.96	CHS.10467.7	NTM	309	355	0.8704	82.6	82.8	0.9976	0	1555	-	Lung	0	11.01237923	FALSE	TRUE
CHS.10467.97	CHS.10467.7	NTM	330	355	0.9296	83.4	82.8	1.0072	0	1555	-	Lung	0	11.01237923	FALSE	TRUE
CHS.10476.1	CHS.10476.10	OPCML	337	338	0.997	85.4	85.1	1.0035	137	1216	Brain	Brain	3.944714265	12.80739552	TRUE	TRUE
CHS.10476.5	CHS.10476.10	OPCML	344	338	1.0178	84.1	85.1	0.9882	159	1216	Brain	Brain	3.685479374	12.80739552	TRUE	TRUE
CHS.10476.6	CHS.10476.10	OPCML	345	338	1.0207	84.3	85.1	0.9906	1663	1216	Skin	Brain	23.45058567	12.80739552	TRUE	TRUE
CHS.10476.7	CHS.10476.10	OPCML	354	338	1.0473	83	85.1	0.9753	84	1216	Brain	Brain	4.673134366	12.80739552	TRUE	TRUE
CHS.10476.8	CHS.10476.10	OPCML	304	338	0.8994	87.8	85.1	1.0317	238	1216	Testis	Brain	1.15295	12.80739552	TRUE	TRUE
CHS.10476.9	CHS.10476.10	OPCML	245	338	0.7249	86.5	85.1	1.0165	382	1216	Brain	Brain	2.413022749	12.80739552	TRUE	TRUE
CHS.1048.5	CHS.1048.1	SNRNP40	300	357	0.8403	81.1	86.3	0.9397	731	9777	Brain	Bone_Marrow	1.891020091	117.3775676	TRUE	TRUE
CHS.10483.7	CHS.10483.8	SPATA19	167	167	1	61.5	61.5	1	228	248	Testis	Testis	46.48296408	95.72014	FALSE	FALSE
CHS.1049.1	CHS.1049.5	ZCCHC17	241	241	1	67.4	67.4	1	8190	9785	Testis	Testis	5.645917947	48.33482348	TRUE	TRUE
CHS.1049.10	CHS.1049.5	ZCCHC17	217	241	0.9004	66.4	67.4	0.9852	3215	9785	Brain	Testis	2.419903796	48.33482348	TRUE	TRUE
CHS.1049.13	CHS.1049.5	ZCCHC17	241	241	1	67.4	67.4	1	8190	9785	Testis	Testis	5.645917947	48.33482348	FALSE	TRUE
CHS.1049.2	CHS.1049.5	ZCCHC17	263	241	1.0913	64.3	67.4	0.954	5205	9785	Fallopian_Tube	Testis	0.318020333	48.33482348	TRUE	TRUE
CHS.1049.3	CHS.1049.5	ZCCHC17	233	241	0.9668	65.8	67.4	0.9763	8136	9785	Testis	Testis	30.66904327	48.33482348	TRUE	TRUE
CHS.1049.4	CHS.1049.5	ZCCHC17	160	241	0.6639	73	67.4	1.0831	7093	9785	Testis	Testis	0.91991401	48.33482348	TRUE	TRUE
CHS.1049.6	CHS.1049.5	ZCCHC17	146	241	0.6058	77	67.4	1.1424	8143	9785	Heart	Testis	1.753221433	48.33482348	TRUE	TRUE
CHS.1049.7	CHS.1049.5	ZCCHC17	168	241	0.6971	77.5	67.4	1.1499	37	9785	Brain	Testis	1.820325	48.33482348	TRUE	TRUE
CHS.1049.8	CHS.1049.5	ZCCHC17	179	241	0.7427	65	67.4	0.9644	6889	9785	Bone_Marrow	Testis	2.19416937	48.33482348	TRUE	TRUE
CHS.1049.9	CHS.1049.5	ZCCHC17	243	241	1.0083	60.6	67.4	0.8991	1	9785	Ovary	Testis	1.26464	48.33482348	TRUE	TRUE
CHS.10493.2	CHS.10493.1	JAM3	259	310	0.8355	79.5	84.3	0.9431	4274	9168	Blood_Vessel	Blood_Vessel	4.360592755	104.133941	TRUE	TRUE
CHS.10496.8	CHS.10496.5	NCAPD3	832	1498	0.5554	81.1	72.4	1.1202	104	7539	Testis	Bone_Marrow	4.203613859	34.49914951	FALSE	FALSE
CHS.10497.20	CHS.10497.1	VPS26B	253	336	0.753	87.5	85.2	1.027	508	9785	Lung	Brain	5.001074091	45.80092161	TRUE	TRUE
CHS.10498.1	CHS.10498.5	THYN1	166	225	0.7378	78.5	83.1	0.9446	9740	9784	Ovary	Pituitary	10.16908572	41.62237308	FALSE	TRUE
CHS.10498.10	CHS.10498.5	THYN1	168	225	0.7467	79	83.1	0.9507	921	9784	Fallopian_Tube	Pituitary	11.7827	41.62237308	TRUE	TRUE
CHS.10498.14	CHS.10498.5	THYN1	176	225	0.7822	85.8	83.1	1.0325	188	9784	Brain	Pituitary	8.130829706	41.62237308	TRUE	TRUE
CHS.10498.15	CHS.10498.5	THYN1	234	225	1.04	77.3	83.1	0.9302	60	9784	Ovary	Pituitary	15.2263	41.62237308	TRUE	TRUE
CHS.10498.2	CHS.10498.5	THYN1	225	225	1	83.1	83.1	1	9765	9784	Bladder	Pituitary	17.86092727	41.62237308	TRUE	TRUE
CHS.10498.3	CHS.10498.5	THYN1	166	225	0.7378	78.5	83.1	0.9446	9740	9784	Ovary	Pituitary	10.16908572	41.62237308	TRUE	TRUE
CHS.10498.4	CHS.10498.5	THYN1	225	225	1	83.1	83.1	1	9765	9784	Bladder	Pituitary	17.86092727	41.62237308	FALSE	TRUE
CHS.10499.10	CHS.10499.11	ACAD8	317	415	0.7639	91.1	92.8	0.9817	372	9717	Stomach	Thyroid	5.636115	41.53703183	TRUE	TRUE
CHS.10499.29	CHS.10499.11	ACAD8	268	415	0.6458	77.8	92.8	0.8384	2352	9717	Thyroid	Thyroid	29.29035953	41.53703183	TRUE	TRUE
CHS.10499.3	CHS.10499.11	ACAD8	391	415	0.9422	87.2	92.8	0.9397	9	9717	Nerve	Thyroid	3.79276	41.53703183	TRUE	TRUE
CHS.10499.34	CHS.10499.11	ACAD8	343	415	0.8265	92.4	92.8	0.9957	1	9717	Muscle	Thyroid	2.27687	41.53703183	TRUE	TRUE
CHS.10499.4	CHS.10499.11	ACAD8	434	415	1.0458	87.1	92.8	0.9386	224	9717	Thyroid	Thyroid	5.59795	41.53703183	TRUE	TRUE
CHS.10499.5	CHS.10499.11	ACAD8	249	415	0.6	85.2	92.8	0.9181	1050	9717	Prostate	Thyroid	18.93029417	41.53703183	FALSE	TRUE
CHS.10499.8	CHS.10499.11	ACAD8	451	415	1.0867	85	92.8	0.9159	51	9717	Salivary_Gland	Thyroid	3.78537	41.53703183	TRUE	TRUE
CHS.10499.9	CHS.10499.11	ACAD8	353	415	0.8506	82	92.8	0.8836	26	9717	Pituitary	Thyroid	2.66751	41.53703183	TRUE	TRUE
CHS.1050.20	CHS.1050.8	FABP3	97	133	0.7293	78.4	93.7	0.8367	1206	9679	Heart	Heart	49.21014354	1567.316234	TRUE	TRUE
CHS.1050.3	CHS.1050.8	FABP3	126	133	0.9474	83.2	93.7	0.8879	1268	9679	Heart	Heart	44.0497216	1567.316234	TRUE	TRUE
CHS.1050.9	CHS.1050.8	FABP3	144	133	1.0827	85.4	93.7	0.9114	0	9679	-	Heart	0	1567.316234	FALSE	TRUE
CHS.10501.2	CHS.10501.3	GLB1L3	641	653	0.9816	88.6	91.5	0.9683	112	890	Uterus	Pancreas	7.295216667	4.3365	FALSE	FALSE
CHS.10501.8	CHS.10501.3	GLB1L3	548	653	0.8392	84.1	91.5	0.9191	11	890	Pituitary	Pancreas	4.4623	4.3365	FALSE	FALSE
CHS.10502.10	CHS.10502.2	GLB1L2	268	636	0.4214	83.7	94.5	0.8857	14	5130	Skin	Prostate	0.893453	42.20027504	TRUE	TRUE
CHS.10502.13	CHS.10502.2	GLB1L2	690	636	1.0849	89.1	94.5	0.9429	6	5130	Brain	Prostate	2.173646	42.20027504	TRUE	TRUE
CHS.10502.16	CHS.10502.2	GLB1L2	530	636	0.8333	85.2	94.5	0.9016	32	5130	Blood	Prostate	2.152007333	42.20027504	TRUE	TRUE
CHS.10502.8	CHS.10502.2	GLB1L2	547	636	0.8601	91.9	94.5	0.9725	29	5130	Brain	Prostate	2.40235	42.20027504	TRUE	TRUE
CHS.10502.9	CHS.10502.2	GLB1L2	164	636	0.2579	81.6	94.5	0.8635	32	5130	Thyroid	Prostate	1.67905	42.20027504	TRUE	TRUE
CHS.10503.11	CHS.10503.10	B3GAT1	334	334	1	85.5	85.5	1	1774	3187	Brain	Brain	21.87920439	31.25988579	FALSE	TRUE
CHS.10503.12	CHS.10503.10	B3GAT1	347	334	1.0389	84.2	85.5	0.9848	2363	3187	Brain	Brain	25.3379201	31.25988579	TRUE	TRUE
CHS.10503.36	CHS.10503.10	B3GAT1	347	334	1.0389	84.2	85.5	0.9848	2363	3187	Brain	Brain	25.3379201	31.25988579	FALSE	TRUE
CHS.10503.9	CHS.10503.10	B3GAT1	334	334	1	85.5	85.5	1	2848	3187	Brain	Brain	34.4812953	31.25988579	TRUE	TRUE
CHS.1053.1	CHS.1053.6	SERINC2	464	455	1.0198	78.3	78.1	1.0026	542	8046	Adipose_Tissue	Bladder	9.844355143	220.575572	TRUE	TRUE
CHS.1053.14	CHS.1053.6	SERINC2	400	455	0.8791	77.7	78.1	0.9949	874	8046	Fallopian_Tube	Bladder	7.03338	220.575572	FALSE	TRUE
CHS.1053.15	CHS.1053.6	SERINC2	459	455	1.0088	77.7	78.1	0.9949	2199	8046	Bladder	Bladder	7.594288875	220.575572	TRUE	TRUE
CHS.1053.2	CHS.1053.6	SERINC2	459	455	1.0088	77.9	78.1	0.9974	1921	8046	Skin	Bladder	2.513385393	220.575572	TRUE	TRUE
CHS.1053.25	CHS.1053.6	SERINC2	400	455	0.8791	77.7	78.1	0.9949	874	8046	Fallopian_Tube	Bladder	7.03338	220.575572	TRUE	TRUE
CHS.10609.15	CHS.10609.14	IQSEC3	759	1182	0.6421	63.6	57.3	1.1099	197	1300	Brain	Skin	1.788032489	74.3269	FALSE	TRUE
CHS.10609.29	CHS.10609.14	IQSEC3	879	1182	0.7437	59.5	57.3	1.0384	608	1300	Brain	Skin	5.935365671	74.3269	TRUE	TRUE
CHS.10609.33	CHS.10609.14	IQSEC3	759	1182	0.6421	63.6	57.3	1.1099	641	1300	Brain	Skin	5.443538989	74.3269	TRUE	TRUE
CHS.10609.34	CHS.10609.14	IQSEC3	760	1182	0.643	63.9	57.3	1.1152	858	1300	Skin	Skin	31.8232	74.3269	TRUE	TRUE
CHS.10614.10	CHS.10614.5	SLC6A12	571	614	0.93	87.6	85.7	1.0222	205	2048	Thyroid	Kidney	2.398798857	35.35224235	FALSE	FALSE
CHS.10614.12	CHS.10614.5	SLC6A12	610	614	0.9935	85.3	85.7	0.9953	51	2048	Liver	Kidney	2.496968036	35.35224235	FALSE	FALSE
CHS.10614.13	CHS.10614.5	SLC6A12	570	614	0.9283	87.1	85.7	1.0163	215	2048	Thyroid	Kidney	2.615183846	35.35224235	FALSE	FALSE
CHS.10614.2	CHS.10614.5	SLC6A12	614	614	1	85.7	85.7	1	1879	2048	Liver	Kidney	11.01204289	35.35224235	FALSE	FALSE
CHS.10614.3	CHS.10614.5	SLC6A12	614	614	1	85.7	85.7	1	1879	2048	Liver	Kidney	11.01204289	35.35224235	FALSE	FALSE
CHS.10614.4	CHS.10614.5	SLC6A12	614	614	1	85.7	85.7	1	1879	2048	Liver	Kidney	11.01204289	35.35224235	TRUE	FALSE
CHS.10614.8	CHS.10614.5	SLC6A12	426	614	0.6938	86.4	85.7	1.0082	256	2048	Uterus	Kidney	4.450559333	35.35224235	FALSE	FALSE
CHS.10619.1	CHS.10619.2	SLC6A13	510	602	0.8472	83	86.3	0.9618	1376	1715	Kidney	Kidney	5.174544906	30.50106012	FALSE	FALSE
CHS.1062.1	CHS.1062.6	TINAGL1	408	467	0.8737	81.7	86	0.95	536	9167	Blood_Vessel	Blood_Vessel	12.81702248	435.6415509	FALSE	FALSE
CHS.1062.13	CHS.1062.6	TINAGL1	362	467	0.7752	92.6	86	1.0767	6358	9167	Blood_Vessel	Blood_Vessel	0.793597084	435.6415509	TRUE	FALSE
CHS.1062.16	CHS.1062.6	TINAGL1	362	467	0.7752	92.6	86	1.0767	6358	9167	Blood_Vessel	Blood_Vessel	0.793597084	435.6415509	FALSE	FALSE
CHS.1062.7	CHS.1062.6	TINAGL1	440	467	0.9422	74.4	86	0.8651	172	9167	Blood_Vessel	Blood_Vessel	11.353555	435.6415509	FALSE	FALSE
CHS.1062.8	CHS.1062.6	TINAGL1	436	467	0.9336	82.6	86	0.9605	7609	9167	Blood_Vessel	Blood_Vessel	9.201284257	435.6415509	FALSE	FALSE
CHS.10622.15	CHS.10622.14	CCDC77	456	488	0.9344	82.9	79.9	1.0375	5509	5010	Bone_Marrow	Bone_Marrow	4.37813646	7.1453833	FALSE	FALSE
CHS.10622.26	CHS.10622.14	CCDC77	418	488	0.8566	79.8	79.9	0.9987	35	5010	Stomach	Bone_Marrow	2.07835	7.1453833	FALSE	FALSE
CHS.10622.28	CHS.10622.14	CCDC77	488	488	1	79.9	79.9	1	1782	5010	Testis	Bone_Marrow	4.391322267	7.1453833	FALSE	FALSE
CHS.10622.3	CHS.10622.14	CCDC77	456	488	0.9344	82.9	79.9	1.0375	5509	5010	Bone_Marrow	Bone_Marrow	4.37813646	7.1453833	FALSE	FALSE
CHS.10622.4	CHS.10622.14	CCDC77	456	488	0.9344	82.9	79.9	1.0375	5509	5010	Bone_Marrow	Bone_Marrow	4.37813646	7.1453833	FALSE	FALSE
CHS.10624.14	CHS.10624.4	B4GALNT3	709	998	0.7104	68.9	71.4	0.965	2501	4470	Stomach	Stomach	45.35726722	33.84952409	TRUE	TRUE
CHS.10624.16	CHS.10624.4	B4GALNT3	547	998	0.5481	68.4	71.4	0.958	988	4470	Stomach	Stomach	29.55333333	33.84952409	TRUE	TRUE
CHS.10627.13	CHS.10627.7	NINJ2	72	142	0.507	79.2	68.2	1.1613	26	6455	Blood	Brain	1.666311313	9.596567529	FALSE	TRUE
CHS.10627.2	CHS.10627.7	NINJ2	135	142	0.9507	76.4	68.2	1.1202	5889	6455	Blood	Brain	3.938788134	9.596567529	TRUE	TRUE
CHS.10627.5	CHS.10627.7	NINJ2	106	142	0.7465	75.5	68.2	1.107	8351	6455	Lung	Brain	19.15389674	9.596567529	TRUE	TRUE
CHS.10627.9	CHS.10627.7	NINJ2	106	142	0.7465	75.5	68.2	1.107	8351	6455	Lung	Brain	19.15389674	9.596567529	FALSE	TRUE
CHS.10637.19	CHS.10637.20	RAD52	341	418	0.8158	62.1	67.3	0.9227	0	8183	-	Thyroid	0	8.036110949	FALSE	FALSE
CHS.10637.21	CHS.10637.20	RAD52	207	418	0.4952	59.1	67.3	0.8782	1429	8183	Cervix_Uteri	Thyroid	3.96337	8.036110949	FALSE	FALSE
CHS.10637.32	CHS.10637.20	RAD52	105	418	0.2512	57.6	67.3	0.8559	1643	8183	Bladder	Thyroid	4791.078893	8.036110949	TRUE	FALSE
CHS.10637.35	CHS.10637.20	RAD52	301	418	0.7201	74	67.3	1.0996	7356	8183	Uterus	Thyroid	0.663445935	8.036110949	FALSE	FALSE
CHS.10637.36	CHS.10637.20	RAD52	226	418	0.5407	68.3	67.3	1.0149	7606	8183	Bladder	Thyroid	0.573809273	8.036110949	FALSE	FALSE
CHS.10637.58	CHS.10637.20	RAD52	340	418	0.8134	75.6	67.3	1.1233	4	8183	Heart	Thyroid	1.64312	8.036110949	FALSE	FALSE
CHS.10637.7	CHS.10637.20	RAD52	300	418	0.7177	74.1	67.3	1.101	6	8183	Lung	Thyroid	1.98746	8.036110949	FALSE	FALSE
CHS.10638.10	CHS.10638.12	ERC1	992	1116	0.8889	71.3	74.4	0.9583	1215	7220	Brain	Blood_Vessel	5.949621003	9.688953178	TRUE	TRUE
CHS.10638.11	CHS.10638.12	ERC1	948	1116	0.8495	70.8	74.4	0.9516	1129	7220	Brain	Blood_Vessel	5.311943172	9.688953178	TRUE	TRUE
CHS.10638.14	CHS.10638.12	ERC1	720	1116	0.6452	72.7	74.4	0.9772	210	7220	Pituitary	Blood_Vessel	0.796682909	9.688953178	TRUE	TRUE
CHS.1064.2	CHS.1064.4	PEF1	214	284	0.7535	83.3	71.8	1.1602	1570	9789	Testis	Thyroid	13.70758564	153.4331033	TRUE	TRUE
CHS.1064.22	CHS.1064.4	PEF1	185	284	0.6514	90.7	71.8	1.2632	1019	9789	Thyroid	Thyroid	4.57816	153.4331033	FALSE	TRUE
CHS.1064.3	CHS.1064.4	PEF1	149	284	0.5246	90.5	71.8	1.2604	9163	9789	Nerve	Thyroid	5.662989246	153.4331033	TRUE	TRUE
CHS.10646.1	CHS.10646.2	FBXL14	411	418	0.9833	90.6	90.5	1.0011	2296	7950	Salivary_Gland	Pituitary	6.007627273	11.03195602	FALSE	FALSE
CHS.10646.10	CHS.10646.2	FBXL14	387	418	0.9258	94.1	90.5	1.0398	3970	7950	Testis	Pituitary	24.621283	11.03195602	FALSE	FALSE
CHS.10646.14	CHS.10646.2	FBXL14	401	418	0.9593	92.4	90.5	1.021	111	7950	Testis	Pituitary	7.970494393	11.03195602	FALSE	FALSE
CHS.10646.3	CHS.10646.2	FBXL14	413	418	0.988	90.5	90.5	1	147	7950	Ovary	Pituitary	10.5465	11.03195602	FALSE	FALSE
CHS.10646.5	CHS.10646.2	FBXL14	404	418	0.9665	91.2	90.5	1.0077	3385	7950	Testis	Pituitary	5.1901925	11.03195602	FALSE	FALSE
CHS.10646.6	CHS.10646.2	FBXL14	386	418	0.9234	93.5	90.5	1.0331	81	7950	Colon	Pituitary	7.06833	11.03195602	FALSE	FALSE
CHS.10648.23	CHS.10648.10	WNT5B	359	359	1	89.3	89.3	1	2121	4630	Skin	Esophagus	39.48324194	5.712965886	FALSE	FALSE
CHS.10648.4	CHS.10648.10	WNT5B	359	359	1	89.3	89.3	1	4630	4630	Esophagus	Esophagus	5.712965886	5.712965886	FALSE	FALSE
CHS.1065.14	CHS.1065.2	HCRTR1	250	425	0.5882	69.5	76.8	0.9049	67	1	Pancreas	Brain	2.11489	0.732188	TRUE	TRUE
CHS.1065.5	CHS.1065.2	HCRTR1	389	425	0.9153	77.5	76.8	1.0091	182	1	Adrenal_Gland	Brain	1.5194664	0.732188	FALSE	TRUE
CHS.10654.1	CHS.10654.16	ADIPOR2	421	386	1.0907	73.4	79.7	0.921	26	9637	Testis	Nerve	4.065196154	52.49044926	TRUE	TRUE
CHS.10654.31	CHS.10654.16	ADIPOR2	317	386	0.8212	68.1	79.7	0.8545	1232	9637	Nerve	Nerve	11.89179677	52.49044926	FALSE	TRUE
CHS.10654.35	CHS.10654.16	ADIPOR2	386	386	1	79.7	79.7	1	9130	9637	Adrenal_Gland	Nerve	53.1722822	52.49044926	FALSE	TRUE
CHS.10654.37	CHS.10654.16	ADIPOR2	419	386	1.0855	73.4	79.7	0.921	0	9637	-	Nerve	0	52.49044926	FALSE	TRUE
CHS.10654.5	CHS.10654.16	ADIPOR2	386	386	1	79.7	79.7	1	9130	9637	Adrenal_Gland	Nerve	53.1722822	52.49044926	TRUE	TRUE
CHS.10655.17	CHS.10655.2	CACNA2D4	974	1137	0.8566	83.5	81.4	1.0258	1	69	Pituitary	Testis	1.2725	2.477424063	TRUE	TRUE
CHS.10655.21	CHS.10655.2	CACNA2D4	267	1137	0.2348	78.8	81.4	0.9681	452	69	Testis	Testis	5.46636	2.477424063	TRUE	TRUE
CHS.10655.27	CHS.10655.2	CACNA2D4	282	1137	0.248	78.7	81.4	0.9668	1209	69	Muscle	Testis	12.8545	2.477424063	TRUE	TRUE
CHS.10658.1	CHS.10658.3	LRTM2	370	370	1	78.6	78.6	1	763	822	Pituitary	Brain	6.58688	8.600553504	TRUE	TRUE
CHS.10658.2	CHS.10658.3	LRTM2	370	370	1	78.6	78.6	1	763	822	Pituitary	Brain	6.58688	8.600553504	FALSE	TRUE
CHS.10659.11	CHS.10659.7	DCP1B	153	617	0.248	64.1	52.1	1.2303	9640	9533	Uterus	Testis	9.501932292	31.8590313	TRUE	TRUE
CHS.10659.12	CHS.10659.7	DCP1B	617	617	1	52.1	52.1	1	1322	9533	Fallopian_Tube	Testis	2.82514	31.8590313	FALSE	TRUE
CHS.10659.5	CHS.10659.7	DCP1B	515	617	0.8347	48.8	52.1	0.9367	4	9533	Colon	Testis	3.95555	31.8590313	FALSE	TRUE
CHS.10677.14	CHS.10677.2	FKBP4	414	459	0.902	91.4	89.6	1.0201	1212	9783	Testis	Bone_Marrow	11.79395683	71.30500784	TRUE	TRUE
CHS.10677.4	CHS.10677.2	FKBP4	363	459	0.7908	89.8	89.6	1.0022	1196	9783	Testis	Bone_Marrow	5.805750833	71.30500784	TRUE	TRUE
CHS.10680.22	CHS.10680.1	ITFG2	335	447	0.7494	79.9	85.7	0.9323	1	9690	Heart	Thyroid	1.14405	35.84330472	FALSE	FALSE
CHS.10680.24	CHS.10680.1	ITFG2	270	447	0.604	83.9	85.7	0.979	2	9690	Skin	Thyroid	5.16881	35.84330472	FALSE	FALSE
CHS.10680.3	CHS.10680.1	ITFG2	438	447	0.9799	83.8	85.7	0.9778	572	9690	Thyroid	Thyroid	2.9771325	35.84330472	FALSE	FALSE
CHS.10682.2	CHS.10682.1	TEX52	208	305	0.682	69.6	63.6	1.0943	14	174	Testis	Testis	6.276330714	5.860832012	TRUE	TRUE
CHS.10682.3	CHS.10682.1	TEX52	80	305	0.2623	62.8	63.6	0.9874	70	174	Testis	Testis	7.545441587	5.860832012	TRUE	TRUE
CHS.10683.2	CHS.10683.5	FOXM1	747	763	0.979	45.7	45.1	1.0133	259	2417	Bone_Marrow	Esophagus	3.3897955	10.20515199	FALSE	FALSE
CHS.10683.24	CHS.10683.5	FOXM1	762	763	0.9987	45.8	45.1	1.0155	816	2417	Cervix_Uteri	Esophagus	5.87338	10.20515199	FALSE	FALSE
CHS.10683.3	CHS.10683.5	FOXM1	748	763	0.9803	46.4	45.1	1.0288	1417	2417	Testis	Esophagus	5.567061244	10.20515199	FALSE	FALSE
CHS.10683.4	CHS.10683.5	FOXM1	748	763	0.9803	46	45.1	1.02	2056	2417	Testis	Esophagus	23.32990248	10.20515199	FALSE	FALSE
CHS.10683.6	CHS.10683.5	FOXM1	801	763	1.0498	44.2	45.1	0.98	911	2417	Skin	Esophagus	6.315171851	10.20515199	FALSE	FALSE
CHS.10684.3	CHS.10684.7	RHNO1	238	238	1	60.1	60.1	1	1115	9638	Blood	Bone_Marrow	2.18566351	24.74143431	FALSE	TRUE
CHS.10684.4	CHS.10684.7	RHNO1	238	238	1	60.1	60.1	1	1115	9638	Blood	Bone_Marrow	2.18566351	24.74143431	TRUE	TRUE
CHS.10684.5	CHS.10684.7	RHNO1	238	238	1	60.1	60.1	1	1115	9638	Blood	Bone_Marrow	2.18566351	24.74143431	FALSE	TRUE
CHS.10684.8	CHS.10684.7	RHNO1	224	238	0.9412	63.7	60.1	1.0599	6774	9638	Testis	Bone_Marrow	2.137895495	24.74143431	TRUE	TRUE
CHS.10684.9	CHS.10684.7	RHNO1	99	238	0.416	71.6	60.1	1.1913	8305	9638	Testis	Bone_Marrow	1.746536576	24.74143431	TRUE	TRUE
CHS.10685.17	CHS.10685.1	TULP3	230	442	0.5204	88.5	71.3	1.2412	3011	9182	Cervix_Uteri	Ovary	7.370666667	47.37563482	TRUE	TRUE
CHS.10685.2	CHS.10685.1	TULP3	501	442	1.1335	66	71.3	0.9257	7689	9182	Cervix_Uteri	Ovary	6.092602727	47.37563482	TRUE	TRUE
CHS.10688.16	CHS.10688.1	TEAD4	434	434	1	73.2	73.2	1	1772	8080	Thyroid	Lung	9.825192008	20.38518766	FALSE	FALSE
CHS.10688.2	CHS.10688.1	TEAD4	391	434	0.9009	76.7	73.2	1.0478	6751	8080	Muscle	Lung	13.93506854	20.38518766	FALSE	FALSE
CHS.10688.8	CHS.10688.1	TEAD4	305	434	0.7028	78.5	73.2	1.0724	4534	8080	Muscle	Lung	1.633830338	20.38518766	FALSE	FALSE
CHS.10691.16	CHS.10691.1	TSPAN9	271	239	1.1339	77	87	0.8851	267	9225	Brain	Uterus	21.33732784	50.32591667	FALSE	FALSE
CHS.10691.2	CHS.10691.1	TSPAN9	239	239	1	87	87	1	8474	9225	Brain	Uterus	8.713818848	50.32591667	FALSE	FALSE
CHS.10695.1	CHS.10695.4	PRMT8	385	394	0.9772	85.9	84.8	1.013	21	1169	Kidney	Skin	3.07731	19.8179	TRUE	TRUE
CHS.10695.10	CHS.10695.4	PRMT8	148	394	0.3756	94	84.8	1.1085	170	1169	Fallopian_Tube	Skin	3.84968	19.8179	TRUE	TRUE
CHS.10695.14	CHS.10695.4	PRMT8	394	394	1	84.8	84.8	1	228	1169	Testis	Skin	8.4469	19.8179	FALSE	TRUE
CHS.10695.15	CHS.10695.4	PRMT8	309	394	0.7843	75.3	84.8	0.888	14	1169	Brain	Skin	1.603619833	19.8179	TRUE	TRUE
CHS.10698.12	CHS.10698.9	CRACR2A	462	731	0.632	71.6	68.6	1.0437	1039	1190	Bone_Marrow	Bladder	3.6083305	1.6036655	FALSE	FALSE
CHS.10698.14	CHS.10698.9	CRACR2A	395	731	0.5404	74.9	68.6	1.0918	2335	1190	Salivary_Gland	Bladder	0.527197373	1.6036655	FALSE	FALSE
CHS.10698.6	CHS.10698.9	CRACR2A	732	731	1.0014	68.9	68.6	1.0044	1184	1190	Salivary_Gland	Bladder	21.50267873	1.6036655	FALSE	FALSE
CHS.10701.13	CHS.10701.5	PARP11	331	338	0.9793	83.5	80.8	1.0334	1941	6571	Cervix_Uteri	Ovary	4.42075	4.14304237	FALSE	TRUE
CHS.10701.4	CHS.10701.5	PARP11	257	338	0.7604	86	80.8	1.0644	6881	6571	Cervix_Uteri	Ovary	2.058210222	4.14304237	TRUE	TRUE
CHS.10701.6	CHS.10701.5	PARP11	185	338	0.5473	75.9	80.8	0.9394	304	6571	Testis	Ovary	1.641011069	4.14304237	FALSE	TRUE
CHS.10701.7	CHS.10701.5	PARP11	257	338	0.7604	86	80.8	1.0644	6881	6571	Cervix_Uteri	Ovary	2.058210222	4.14304237	FALSE	TRUE
CHS.10716.22	CHS.10716.3	CCND2	303	289	1.0484	83.6	87.1	0.9598	135	9064	Blood	Adrenal_Gland	3.332277974	66.2873	TRUE	TRUE
CHS.10716.4	CHS.10716.3	CCND2	200	289	0.692	88	87.1	1.0103	1261	9064	Bladder	Adrenal_Gland	2.68698	66.2873	TRUE	TRUE
CHS.1072.54	CHS.1072.64	ADGRB2	736	1585	0.4644	74.4	60.1	1.2379	5	5	Skin	Brain	1.9759	8.38425	FALSE	FALSE
CHS.10720.1	CHS.10720.4	FGF6	152	208	0.7308	73.8	77.9	0.9474	233	354	Salivary_Gland	Muscle	2.87436	5.780968516	TRUE	TRUE
CHS.10720.2	CHS.10720.4	FGF6	165	208	0.7933	68.2	77.9	0.8755	73	354	Muscle	Muscle	1.210652836	5.780968516	TRUE	TRUE
CHS.10720.6	CHS.10720.4	FGF6	163	208	0.7837	68.4	77.9	0.878	264	354	Muscle	Muscle	1.729261409	5.780968516	FALSE	TRUE
CHS.10720.8	CHS.10720.4	FGF6	153	208	0.7356	73.4	77.9	0.9422	62	354	Muscle	Muscle	1.235898689	5.780968516	TRUE	TRUE
CHS.10723.10	CHS.10723.4	C12orf4	419	552	0.7591	77.6	83.5	0.9293	4	8691	Blood_Vessel	Testis	0.886307	8.651605208	FALSE	FALSE
CHS.10723.20	CHS.10723.4	C12orf4	251	552	0.4547	82.9	83.5	0.9928	3050	8691	Fallopian_Tube	Testis	2.896955	8.651605208	FALSE	FALSE
CHS.10723.22	CHS.10723.4	C12orf4	509	552	0.9221	81.3	83.5	0.9737	174	8691	Pituitary	Testis	2.63667	8.651605208	TRUE	FALSE
CHS.10723.23	CHS.10723.4	C12orf4	268	552	0.4855	86.2	83.5	1.0323	537	8691	Small_Intestine	Testis	2.00951	8.651605208	TRUE	FALSE
CHS.10723.24	CHS.10723.4	C12orf4	336	552	0.6087	77.2	83.5	0.9246	0	8691	-	Testis	0	8.651605208	TRUE	FALSE
CHS.10723.3	CHS.10723.4	C12orf4	552	552	1	83.5	83.5	1	3179	8691	Cervix_Uteri	Testis	2.367952	8.651605208	FALSE	FALSE
CHS.10723.6	CHS.10723.4	C12orf4	268	552	0.4855	86.2	83.5	1.0323	537	8691	Small_Intestine	Testis	2.00951	8.651605208	FALSE	FALSE
CHS.10723.7	CHS.10723.4	C12orf4	379	552	0.6866	83.6	83.5	1.0012	17	8691	Liver	Testis	1.64039	8.651605208	FALSE	FALSE
CHS.10723.8	CHS.10723.4	C12orf4	509	552	0.9221	81.3	83.5	0.9737	174	8691	Pituitary	Testis	2.63667	8.651605208	FALSE	FALSE
CHS.10724.1	CHS.10724.2	RAD51AP1	352	335	1.0507	54.3	55.5	0.9784	1518	2846	Blood	Blood	6.029736118	12.88504221	TRUE	TRUE
CHS.10724.13	CHS.10724.2	RAD51AP1	235	335	0.7015	60.3	55.5	1.0865	144	2846	Bone_Marrow	Blood	7.709826923	12.88504221	TRUE	TRUE
CHS.10724.28	CHS.10724.2	RAD51AP1	221	335	0.6597	59.4	55.5	1.0703	27	2846	Brain	Blood	2.07524	12.88504221	FALSE	TRUE
CHS.10725.16	CHS.10725.33	DYRK4	234	634	0.3691	63.9	67.8	0.9425	4394	18	Fallopian_Tube	Testis	26.74846667	5.891958889	TRUE	TRUE
CHS.10725.17	CHS.10725.33	DYRK4	233	634	0.3675	64.3	67.8	0.9484	2584	18	Pituitary	Testis	11.01141791	5.891958889	TRUE	TRUE
CHS.10725.18	CHS.10725.33	DYRK4	156	634	0.2461	55.4	67.8	0.8171	3821	18	Cervix_Uteri	Testis	13.51794222	5.891958889	TRUE	TRUE
CHS.10725.22	CHS.10725.33	DYRK4	157	634	0.2476	55.4	67.8	0.8171	3131	18	Pituitary	Testis	20.70247295	5.891958889	FALSE	TRUE
CHS.10725.35	CHS.10725.33	DYRK4	635	634	1.0016	67.7	67.8	0.9985	61	18	Spleen	Testis	8.17991	5.891958889	TRUE	TRUE
CHS.10725.43	CHS.10725.33	DYRK4	629	634	0.9921	67.9	67.8	1.0015	97	18	Testis	Testis	15.3366	5.891958889	TRUE	TRUE
CHS.10725.50	CHS.10725.33	DYRK4	327	634	0.5158	73.3	67.8	1.0811	605	18	Prostate	Testis	17.17823133	5.891958889	FALSE	TRUE
CHS.10725.52	CHS.10725.33	DYRK4	234	634	0.3691	63.9	67.8	0.9425	1265	18	Prostate	Testis	21.09078053	5.891958889	FALSE	TRUE
CHS.10725.7	CHS.10725.33	DYRK4	146	634	0.2303	77.7	67.8	1.146	202	18	Testis	Testis	2.302112746	5.891958889	FALSE	TRUE
CHS.10725.8	CHS.10725.33	DYRK4	520	634	0.8202	76.8	67.8	1.1327	232	18	Skin	Testis	3.85999	5.891958889	TRUE	TRUE
CHS.10726.21	CHS.10726.4	AKAP3	568	853	0.6659	52.1	45.1	1.1552	4474	507	Testis	Testis	2549.02766	42.45224842	TRUE	FALSE
CHS.10726.24	CHS.10726.4	AKAP3	853	853	1	45.1	45.1	1	490	507	Testis	Testis	78.4815398	42.45224842	FALSE	FALSE
CHS.10726.3	CHS.10726.4	AKAP3	853	853	1	45.1	45.1	1	490	507	Testis	Testis	78.4815398	42.45224842	TRUE	FALSE
CHS.10733.9	CHS.10733.17	KCNA6	529	529	1	73	73	1	6507	0	Brain	-	5.023803161	0	FALSE	TRUE
CHS.10745.5	CHS.10745.2	NTF3	257	270	0.9519	71.9	72	0.9986	9090	7026	Pituitary	Blood_Vessel	0.248403946	28.58487946	TRUE	TRUE
CHS.10745.7	CHS.10745.2	NTF3	257	270	0.9519	71.9	72	0.9986	9090	7026	Pituitary	Blood_Vessel	0.248403946	28.58487946	TRUE	TRUE
CHS.10747.10	CHS.10747.7	ANO2	921	998	0.9228	72.6	71	1.0225	2	27	Vagina	Salivary_Gland	0.862375	8.5775	TRUE	TRUE
CHS.10747.36	CHS.10747.7	ANO2	599	998	0.6002	77.8	71	1.0958	86	27	Lung	Salivary_Gland	4.039836	8.5775	FALSE	TRUE
CHS.10747.4	CHS.10747.7	ANO2	546	998	0.5471	76.9	71	1.0831	96	27	Testis	Salivary_Gland	4.3923256	8.5775	FALSE	TRUE
CHS.10747.50	CHS.10747.7	ANO2	238	998	0.2385	82.7	71	1.1648	4	27	Breast	Salivary_Gland	4.0258	8.5775	TRUE	TRUE
CHS.10747.55	CHS.10747.7	ANO2	358	998	0.3587	72	71	1.0141	58	27	Lung	Salivary_Gland	3.1833825	8.5775	TRUE	TRUE
CHS.10747.6	CHS.10747.7	ANO2	1003	998	1.005	73.4	71	1.0338	0	27	-	Salivary_Gland	0	8.5775	TRUE	TRUE
CHS.10747.8	CHS.10747.7	ANO2	999	998	1.001	70.2	71	0.9887	0	27	-	Salivary_Gland	0	8.5775	FALSE	TRUE
CHS.10747.9	CHS.10747.7	ANO2	994	998	0.996	70.9	71	0.9986	604	27	Lung	Salivary_Gland	4.309020813	8.5775	FALSE	TRUE
CHS.1075.27	CHS.1075.6	SPOCD1	289	1216	0.2377	53.9	46.9	1.1493	30	185	Prostate	Testis	2.22742	5.871778408	FALSE	FALSE
CHS.1075.28	CHS.1075.6	SPOCD1	509	1216	0.4186	58.6	46.9	1.2495	1615	185	Brain	Testis	23.57051733	5.871778408	FALSE	FALSE
CHS.1075.35	CHS.1075.6	SPOCD1	278	1216	0.2286	58.3	46.9	1.2431	414	185	Bladder	Testis	26.542475	5.871778408	FALSE	FALSE
CHS.1075.4	CHS.1075.6	SPOCD1	696	1216	0.5724	56.4	46.9	1.2026	250	185	Skin	Testis	3.802703457	5.871778408	FALSE	FALSE
CHS.1075.7	CHS.1075.6	SPOCD1	467	1216	0.384	55.3	46.9	1.1791	115	185	Prostate	Testis	3.12098	5.871778408	FALSE	FALSE
CHS.10759.11	CHS.10759.14	CD9	228	228	1	84.1	84.1	1	1075	9782	Nerve	Vagina	32.72575972	637.5239307	TRUE	TRUE
CHS.10759.15	CHS.10759.14	CD9	249	228	1.0921	64.5	84.1	0.7669	6	9782	Prostate	Vagina	84.9127	637.5239307	TRUE	TRUE
CHS.10759.22	CHS.10759.14	CD9	216	228	0.9474	70.6	84.1	0.8395	5	9782	Blood	Vagina	0.8009728	637.5239307	TRUE	TRUE
CHS.10759.23	CHS.10759.14	CD9	251	228	1.1009	76.3	84.1	0.9073	104	9782	Nerve	Vagina	14.98481962	637.5239307	TRUE	TRUE
CHS.10759.26	CHS.10759.14	CD9	173	228	0.7588	79.9	84.1	0.9501	70	9782	Brain	Vagina	5.33553	637.5239307	TRUE	TRUE
CHS.10759.3	CHS.10759.14	CD9	159	228	0.6974	85.7	84.1	1.019	6977	9782	Nerve	Vagina	4.363452301	637.5239307	TRUE	TRUE
CHS.1076.13	CHS.1076.20	PTP4A2	136	167	0.8144	74.7	89.6	0.8337	9792	9796	Bone_Marrow	Bone_Marrow	12.22841527	130.697699	TRUE	TRUE
CHS.1076.14	CHS.1076.20	PTP4A2	142	167	0.8503	77.7	89.6	0.8672	9594	9796	Bone_Marrow	Bone_Marrow	6.711101039	130.697699	TRUE	TRUE
CHS.1076.3	CHS.1076.20	PTP4A2	136	167	0.8144	74.7	89.6	0.8337	9792	9796	Bone_Marrow	Bone_Marrow	12.22841527	130.697699	TRUE	TRUE
CHS.1076.4	CHS.1076.20	PTP4A2	142	167	0.8503	77.7	89.6	0.8672	9594	9796	Bone_Marrow	Bone_Marrow	6.711101039	130.697699	TRUE	TRUE
CHS.1076.41	CHS.1076.20	PTP4A2	167	167	1	89.6	89.6	1	4189	9796	Bone_Marrow	Bone_Marrow	88.5212	130.697699	FALSE	TRUE
CHS.1076.9	CHS.1076.20	PTP4A2	136	167	0.8144	74.7	89.6	0.8337	9792	9796	Bone_Marrow	Bone_Marrow	12.22841527	130.697699	FALSE	TRUE
CHS.10763.1	CHS.10763.4	PLEKHG6	790	790	1	66.1	66.1	1	1339	2994	Prostate	Colon	2.494396474	38.98459723	TRUE	TRUE
CHS.10763.11	CHS.10763.4	PLEKHG6	676	790	0.8557	70.1	66.1	1.0605	553	2994	Pituitary	Colon	1.52867	38.98459723	FALSE	TRUE
CHS.10763.16	CHS.10763.4	PLEKHG6	571	790	0.7228	77.4	66.1	1.171	61	2994	Small_Intestine	Colon	3.95351	38.98459723	FALSE	TRUE
CHS.10763.17	CHS.10763.4	PLEKHG6	768	790	0.9722	67.2	66.1	1.0166	123	2994	Salivary_Gland	Colon	4.828856667	38.98459723	TRUE	TRUE
CHS.10763.18	CHS.10763.4	PLEKHG6	557	790	0.7051	80	66.1	1.2103	7	2994	Thyroid	Colon	3.63927	38.98459723	TRUE	TRUE
CHS.10763.20	CHS.10763.4	PLEKHG6	495	790	0.6266	76.7	66.1	1.1604	27	2994	Breast	Colon	2.517576667	38.98459723	TRUE	TRUE
CHS.10763.25	CHS.10763.4	PLEKHG6	806	790	1.0203	64.3	66.1	0.9728	0	2994	-	Colon	0	38.98459723	FALSE	TRUE
CHS.10763.26	CHS.10763.4	PLEKHG6	789	790	0.9987	66	66.1	0.9985	0	2994	-	Colon	0	38.98459723	TRUE	TRUE
CHS.10763.28	CHS.10763.4	PLEKHG6	511	790	0.6468	73.5	66.1	1.112	0	2994	-	Colon	0	38.98459723	FALSE	TRUE
CHS.10763.29	CHS.10763.4	PLEKHG6	473	790	0.5987	78.6	66.1	1.1891	0	2994	-	Colon	0	38.98459723	FALSE	TRUE
CHS.10763.3	CHS.10763.4	PLEKHG6	593	790	0.7506	75	66.1	1.1346	389	2994	Small_Intestine	Colon	5.1801725	38.98459723	FALSE	TRUE
CHS.10763.9	CHS.10763.4	PLEKHG6	790	790	1	66.1	66.1	1	1339	2994	Prostate	Colon	2.494396474	38.98459723	FALSE	TRUE
CHS.10764.2	CHS.10764.3	TNFRSF1A	347	455	0.7626	68.3	68.9	0.9913	9338	9780	Lung	Nerve	4.329633117	193.4535493	FALSE	FALSE
CHS.10764.20	CHS.10764.3	TNFRSF1A	302	455	0.6637	59.5	68.9	0.8636	2699	9780	Fallopian_Tube	Nerve	8.83433	193.4535493	FALSE	FALSE
CHS.10764.21	CHS.10764.3	TNFRSF1A	285	455	0.6264	59.9	68.9	0.8694	3183	9780	Lung	Nerve	10.85796679	193.4535493	FALSE	FALSE
CHS.10764.22	CHS.10764.3	TNFRSF1A	223	455	0.4901	62.3	68.9	0.9042	4058	9780	Lung	Nerve	15.19293048	193.4535493	FALSE	FALSE
CHS.10767.2	CHS.10767.3	SCNN1A	728	669	1.0882	69.4	73.1	0.9494	5001	4104	Salivary_Gland	Lung	110.2751511	22.81181773	TRUE	TRUE
CHS.10767.30	CHS.10767.3	SCNN1A	669	669	1	73.1	73.1	1	1701	4104	Salivary_Gland	Lung	18.47288558	22.81181773	TRUE	TRUE
CHS.10767.31	CHS.10767.3	SCNN1A	369	669	0.5516	78.1	73.1	1.0684	560	4104	Fallopian_Tube	Lung	60.7605	22.81181773	TRUE	TRUE
CHS.10767.39	CHS.10767.3	SCNN1A	511	669	0.7638	74.5	73.1	1.0192	5	4104	Testis	Lung	3.53806	22.81181773	TRUE	TRUE
CHS.10767.4	CHS.10767.3	SCNN1A	692	669	1.0344	71.7	73.1	0.9808	2630	4104	Cervix_Uteri	Lung	5.6862	22.81181773	TRUE	TRUE
CHS.10771.2	CHS.10771.5	LTBR	416	435	0.9563	65.8	65.1	1.0108	5858	9711	Thyroid	Skin	5.559291373	125.7602541	TRUE	TRUE
CHS.10771.20	CHS.10771.5	LTBR	255	435	0.5862	78.9	65.1	1.212	1727	9711	Skin	Skin	6.303588554	125.7602541	FALSE	TRUE
CHS.10776.10	CHS.10776.3	TAPBPL	447	468	0.9551	81	78.3	1.0345	395	9639	Thyroid	Thyroid	7.07337	24.69850733	FALSE	TRUE
CHS.10776.12	CHS.10776.3	TAPBPL	338	468	0.7222	83	78.3	1.06	8582	9639	Thyroid	Thyroid	20.27243145	24.69850733	FALSE	TRUE
CHS.10776.15	CHS.10776.3	TAPBPL	301	468	0.6432	87.9	78.3	1.1226	10	9639	Nerve	Thyroid	5.20687	24.69850733	FALSE	TRUE
CHS.10776.16	CHS.10776.3	TAPBPL	338	468	0.7222	83	78.3	1.06	8582	9639	Thyroid	Thyroid	20.27243145	24.69850733	FALSE	TRUE
CHS.10776.6	CHS.10776.3	TAPBPL	431	468	0.9209	81.6	78.3	1.0421	853	9639	Thyroid	Thyroid	8.754982609	24.69850733	FALSE	TRUE
CHS.10776.9	CHS.10776.3	TAPBPL	262	468	0.5598	73.1	78.3	0.9336	1891	9639	Thyroid	Thyroid	7.464549636	24.69850733	FALSE	TRUE
CHS.10777.14	CHS.10777.5	VAMP1	106	118	0.8983	77.7	80.1	0.97	5	4829	Prostate	Brain	2.32599	31.36840526	TRUE	TRUE
CHS.10777.3	CHS.10777.5	VAMP1	116	118	0.9831	76.7	80.1	0.9576	7461	4829	Uterus	Brain	3.428058602	31.36840526	TRUE	TRUE
CHS.10777.4	CHS.10777.5	VAMP1	116	118	0.9831	78.3	80.1	0.9775	6657	4829	Blood_Vessel	Brain	2.496299188	31.36840526	TRUE	TRUE
CHS.10777.6	CHS.10777.5	VAMP1	117	118	0.9915	69.1	80.1	0.8627	9744	4829	Thyroid	Brain	44.67142861	31.36840526	TRUE	TRUE
CHS.10778.1	CHS.10778.4	MRPL51	76	128	0.5938	81	79.2	1.0227	7689	9787	Testis	Testis	29.0452498	133.7858932	TRUE	TRUE
CHS.10778.2	CHS.10778.4	MRPL51	76	128	0.5938	81	79.2	1.0227	7689	9787	Testis	Testis	29.0452498	133.7858932	FALSE	TRUE
CHS.10779.15	CHS.10779.5	NCAPD2	737	1401	0.5261	80.7	79.7	1.0125	675	9182	Bone_Marrow	Bone_Marrow	5.388880588	93.02892157	TRUE	TRUE
CHS.10781.14	CHS.10781.3	GAPDH	335	335	1	97.1	97.1	1	9787	9787	Muscle	Muscle	109.9763509	109.9763509	FALSE	FALSE
CHS.10781.15	CHS.10781.3	GAPDH	293	335	0.8746	97.1	97.1	1	9675	9787	Testis	Muscle	143.9174714	109.9763509	FALSE	FALSE
CHS.10781.17	CHS.10781.3	GAPDH	161	335	0.4806	90.5	97.1	0.932	2	9787	Muscle	Muscle	177.333	109.9763509	FALSE	FALSE
CHS.10781.18	CHS.10781.3	GAPDH	317	335	0.9463	95.7	97.1	0.9856	0	9787	-	Muscle	0	109.9763509	FALSE	FALSE
CHS.10781.2	CHS.10781.3	GAPDH	335	335	1	97.1	97.1	1	9787	9787	Muscle	Muscle	109.9763509	109.9763509	FALSE	FALSE
CHS.10782.19	CHS.10782.5	IFFO1	559	571	0.979	61.7	60.9	1.0131	9264	7712	Brain	Cervix_Uteri	3.332086887	2.7285233	TRUE	TRUE
CHS.10782.22	CHS.10782.5	IFFO1	561	571	0.9825	61.7	60.9	1.0131	4	7712	Blood_Vessel	Cervix_Uteri	2.640573333	2.7285233	TRUE	TRUE
CHS.10782.3	CHS.10782.5	IFFO1	562	571	0.9842	61.2	60.9	1.0049	9539	7712	Blood_Vessel	Cervix_Uteri	6.743055901	2.7285233	TRUE	TRUE
CHS.10782.4	CHS.10782.5	IFFO1	563	571	0.986	61.5	60.9	1.0099	9560	7712	Blood_Vessel	Cervix_Uteri	5.28306614	2.7285233	TRUE	TRUE
CHS.10782.44	CHS.10782.5	IFFO1	449	571	0.7863	59.6	60.9	0.9787	6885	7712	Nerve	Cervix_Uteri	27.79488163	2.7285233	TRUE	TRUE
CHS.10782.6	CHS.10782.5	IFFO1	264	571	0.4623	56.6	60.9	0.9294	8714	7712	Blood_Vessel	Cervix_Uteri	1.719643223	2.7285233	TRUE	TRUE
CHS.10783.1	CHS.10783.3	NOP2	808	812	0.9951	61.4	60.8	1.0099	9494	9677	Cervix_Uteri	Bone_Marrow	2.556043455	19.45663539	FALSE	FALSE
CHS.10783.2	CHS.10783.3	NOP2	628	812	0.7734	70.5	60.8	1.1595	3019	9677	Spleen	Bone_Marrow	7.521830537	19.45663539	FALSE	FALSE
CHS.10783.4	CHS.10783.3	NOP2	845	812	1.0406	59.6	60.8	0.9803	2866	9677	Prostate	Bone_Marrow	6.412183714	19.45663539	FALSE	FALSE
CHS.10783.5	CHS.10783.3	NOP2	808	812	0.9951	61.4	60.8	1.0099	9494	9677	Cervix_Uteri	Bone_Marrow	2.556043455	19.45663539	FALSE	FALSE
CHS.10791.2	CHS.10791.3	LPAR5	372	372	1	80.5	80.5	1	3566	6607	Spleen	Vagina	2.75447788	12.8529563	TRUE	TRUE
CHS.10791.6	CHS.10791.3	LPAR5	272	372	0.7312	88.9	80.5	1.1043	352	6607	Salivary_Gland	Vagina	3.10364	12.8529563	TRUE	TRUE
CHS.10793.1	CHS.10793.4	ING4	225	248	0.9073	73.2	75.5	0.9695	7935	9778	Brain	Thyroid	0.60440312	15.42023681	TRUE	TRUE
CHS.10793.13	CHS.10793.4	ING4	168	248	0.6774	78.4	75.5	1.0384	290	9778	Vagina	Thyroid	3.06811	15.42023681	TRUE	TRUE
CHS.10793.14	CHS.10793.4	ING4	172	248	0.6935	77.5	75.5	1.0265	143	9778	Ovary	Thyroid	3.31133	15.42023681	TRUE	TRUE
CHS.10793.17	CHS.10793.4	ING4	77	248	0.3105	77.5	75.5	1.0265	1240	9778	Ovary	Thyroid	2.386969545	15.42023681	TRUE	TRUE
CHS.10793.2	CHS.10793.4	ING4	245	248	0.9879	75.5	75.5	1	9748	9778	Fallopian_Tube	Thyroid	10.18383286	15.42023681	TRUE	TRUE
CHS.10793.21	CHS.10793.4	ING4	51	248	0.2056	82.2	75.5	1.0887	1240	9778	Ovary	Thyroid	2.386969545	15.42023681	TRUE	TRUE
CHS.10793.28	CHS.10793.4	ING4	171	248	0.6895	77.8	75.5	1.0305	298	9778	Uterus	Thyroid	2.074853333	15.42023681	TRUE	TRUE
CHS.10793.3	CHS.10793.4	ING4	246	248	0.9919	75.2	75.5	0.996	9166	9778	Thyroid	Thyroid	1.472847773	15.42023681	TRUE	TRUE
CHS.10793.5	CHS.10793.4	ING4	179	248	0.7218	76.2	75.5	1.0093	4088	9778	Spleen	Thyroid	0.196445339	15.42023681	TRUE	TRUE
CHS.10793.6	CHS.10793.4	ING4	249	248	1.004	75	75.5	0.9934	9775	9778	Thyroid	Thyroid	22.83627619	15.42023681	TRUE	TRUE
CHS.10793.8	CHS.10793.4	ING4	51	248	0.2056	82.2	75.5	1.0887	1240	9778	Ovary	Thyroid	2.386969545	15.42023681	TRUE	TRUE
CHS.10794.11	CHS.10794.19	ZNF384	531	608	0.8734	54.2	54.6	0.9927	891	552	Uterus	Spleen	6.51905875	11.7813	TRUE	TRUE
CHS.10794.13	CHS.10794.19	ZNF384	577	608	0.949	57.6	54.6	1.0549	9662	552	Spleen	Spleen	32.2071578	11.7813	FALSE	TRUE
CHS.10794.14	CHS.10794.19	ZNF384	500	608	0.8224	56.5	54.6	1.0348	1466	552	Uterus	Spleen	17.83370333	11.7813	TRUE	TRUE
CHS.10794.15	CHS.10794.19	ZNF384	561	608	0.9227	57.3	54.6	1.0495	822	552	Uterus	Spleen	17.22120286	11.7813	TRUE	TRUE
CHS.10794.16	CHS.10794.19	ZNF384	592	608	0.9737	54.9	54.6	1.0055	708	552	Uterus	Spleen	6.900248462	11.7813	TRUE	TRUE
CHS.10794.17	CHS.10794.19	ZNF384	577	608	0.949	57.6	54.6	1.0549	9662	552	Spleen	Spleen	32.2071578	11.7813	TRUE	TRUE
CHS.10794.18	CHS.10794.19	ZNF384	547	608	0.8997	54.1	54.6	0.9908	806	552	Bladder	Spleen	12.064606	11.7813	TRUE	TRUE
CHS.10794.20	CHS.10794.19	ZNF384	516	608	0.8487	56.5	54.6	1.0348	9674	552	Spleen	Spleen	7.045862517	11.7813	TRUE	TRUE
CHS.10794.21	CHS.10794.19	ZNF384	516	608	0.8487	56.5	54.6	1.0348	9674	552	Spleen	Spleen	7.045862517	11.7813	FALSE	TRUE
CHS.10794.22	CHS.10794.19	ZNF384	461	608	0.7582	58	54.6	1.0623	7326	552	Cervix_Uteri	Spleen	1.638191	11.7813	TRUE	TRUE
CHS.10794.23	CHS.10794.19	ZNF384	500	608	0.8224	56.5	54.6	1.0348	1466	552	Uterus	Spleen	17.83370333	11.7813	TRUE	TRUE
CHS.10794.24	CHS.10794.19	ZNF384	561	608	0.9227	57.3	54.6	1.0495	822	552	Uterus	Spleen	17.22120286	11.7813	TRUE	TRUE
CHS.10794.26	CHS.10794.19	ZNF384	516	608	0.8487	56.5	54.6	1.0348	9674	552	Spleen	Spleen	7.045862517	11.7813	TRUE	TRUE
CHS.10794.27	CHS.10794.19	ZNF384	577	608	0.949	57.6	54.6	1.0549	9662	552	Spleen	Spleen	32.2071578	11.7813	TRUE	TRUE
CHS.10794.28	CHS.10794.19	ZNF384	608	608	1	54.6	54.6	1	552	552	Spleen	Spleen	11.7813	11.7813	TRUE	TRUE
CHS.10794.29	CHS.10794.19	ZNF384	577	608	0.949	57.6	54.6	1.0549	9662	552	Spleen	Spleen	32.2071578	11.7813	TRUE	TRUE
CHS.10794.3	CHS.10794.19	ZNF384	608	608	1	54.6	54.6	1	552	552	Spleen	Spleen	11.7813	11.7813	TRUE	TRUE
CHS.10794.36	CHS.10794.19	ZNF384	531	608	0.8734	54.2	54.6	0.9927	891	552	Uterus	Spleen	6.51905875	11.7813	FALSE	TRUE
CHS.10794.37	CHS.10794.19	ZNF384	547	608	0.8997	54.1	54.6	0.9908	806	552	Bladder	Spleen	12.064606	11.7813	TRUE	TRUE
CHS.10794.38	CHS.10794.19	ZNF384	561	608	0.9227	57.3	54.6	1.0495	822	552	Uterus	Spleen	17.22120286	11.7813	TRUE	TRUE
CHS.10794.39	CHS.10794.19	ZNF384	500	608	0.8224	56.5	54.6	1.0348	1466	552	Uterus	Spleen	17.83370333	11.7813	TRUE	TRUE
CHS.10794.4	CHS.10794.19	ZNF384	516	608	0.8487	56.5	54.6	1.0348	9674	552	Spleen	Spleen	7.045862517	11.7813	TRUE	TRUE
CHS.10794.40	CHS.10794.19	ZNF384	285	608	0.4688	71.3	54.6	1.3059	56	552	Spleen	Spleen	11.1994	11.7813	TRUE	TRUE
CHS.10794.42	CHS.10794.19	ZNF384	516	608	0.8487	56.5	54.6	1.0348	9674	552	Spleen	Spleen	7.045862517	11.7813	TRUE	TRUE
CHS.10794.43	CHS.10794.19	ZNF384	608	608	1	54.6	54.6	1	552	552	Spleen	Spleen	11.7813	11.7813	TRUE	TRUE
CHS.10794.44	CHS.10794.19	ZNF384	516	608	0.8487	56.5	54.6	1.0348	9674	552	Spleen	Spleen	7.045862517	11.7813	TRUE	TRUE
CHS.10794.45	CHS.10794.19	ZNF384	547	608	0.8997	54.1	54.6	0.9908	806	552	Bladder	Spleen	12.064606	11.7813	TRUE	TRUE
CHS.10794.46	CHS.10794.19	ZNF384	500	608	0.8224	56.5	54.6	1.0348	1466	552	Uterus	Spleen	17.83370333	11.7813	TRUE	TRUE
CHS.10794.49	CHS.10794.19	ZNF384	577	608	0.949	57.6	54.6	1.0549	9662	552	Spleen	Spleen	32.2071578	11.7813	FALSE	TRUE
CHS.10794.5	CHS.10794.19	ZNF384	577	608	0.949	57.6	54.6	1.0549	9662	552	Spleen	Spleen	32.2071578	11.7813	TRUE	TRUE
CHS.10794.51	CHS.10794.19	ZNF384	531	608	0.8734	54.2	54.6	0.9927	891	552	Uterus	Spleen	6.51905875	11.7813	TRUE	TRUE
CHS.10794.53	CHS.10794.19	ZNF384	500	608	0.8224	56.5	54.6	1.0348	1466	552	Uterus	Spleen	17.83370333	11.7813	TRUE	TRUE
CHS.10794.56	CHS.10794.19	ZNF384	592	608	0.9737	54.9	54.6	1.0055	708	552	Uterus	Spleen	6.900248462	11.7813	TRUE	TRUE
CHS.10794.57	CHS.10794.19	ZNF384	516	608	0.8487	56.5	54.6	1.0348	9674	552	Spleen	Spleen	7.045862517	11.7813	TRUE	TRUE
CHS.10794.58	CHS.10794.19	ZNF384	577	608	0.949	57.6	54.6	1.0549	9662	552	Spleen	Spleen	32.2071578	11.7813	TRUE	TRUE
CHS.10794.6	CHS.10794.19	ZNF384	500	608	0.8224	56.5	54.6	1.0348	1466	552	Uterus	Spleen	17.83370333	11.7813	TRUE	TRUE
CHS.10794.60	CHS.10794.19	ZNF384	516	608	0.8487	56.5	54.6	1.0348	9674	552	Spleen	Spleen	7.045862517	11.7813	FALSE	TRUE
CHS.10794.61	CHS.10794.19	ZNF384	516	608	0.8487	56.5	54.6	1.0348	9674	552	Spleen	Spleen	7.045862517	11.7813	TRUE	TRUE
CHS.10794.62	CHS.10794.19	ZNF384	500	608	0.8224	56.5	54.6	1.0348	1466	552	Uterus	Spleen	17.83370333	11.7813	FALSE	TRUE
CHS.10794.63	CHS.10794.19	ZNF384	500	608	0.8224	56.5	54.6	1.0348	1466	552	Uterus	Spleen	17.83370333	11.7813	TRUE	TRUE
CHS.10794.65	CHS.10794.19	ZNF384	608	608	1	54.6	54.6	1	552	552	Spleen	Spleen	11.7813	11.7813	TRUE	TRUE
CHS.10794.66	CHS.10794.19	ZNF384	461	608	0.7582	58	54.6	1.0623	7326	552	Cervix_Uteri	Spleen	1.638191	11.7813	TRUE	TRUE
CHS.10794.68	CHS.10794.19	ZNF384	516	608	0.8487	56.5	54.6	1.0348	9674	552	Spleen	Spleen	7.045862517	11.7813	TRUE	TRUE
CHS.10794.69	CHS.10794.19	ZNF384	500	608	0.8224	56.5	54.6	1.0348	1466	552	Uterus	Spleen	17.83370333	11.7813	TRUE	TRUE
CHS.10794.7	CHS.10794.19	ZNF384	516	608	0.8487	56.5	54.6	1.0348	9674	552	Spleen	Spleen	7.045862517	11.7813	TRUE	TRUE
CHS.10794.70	CHS.10794.19	ZNF384	553	608	0.9095	57.4	54.6	1.0513	1	552	Thyroid	Spleen	1.49962	11.7813	TRUE	TRUE
CHS.10794.71	CHS.10794.19	ZNF384	547	608	0.8997	54.1	54.6	0.9908	806	552	Bladder	Spleen	12.064606	11.7813	TRUE	TRUE
CHS.10794.72	CHS.10794.19	ZNF384	516	608	0.8487	56.5	54.6	1.0348	9674	552	Spleen	Spleen	7.045862517	11.7813	TRUE	TRUE
CHS.10794.73	CHS.10794.19	ZNF384	500	608	0.8224	56.5	54.6	1.0348	1466	552	Uterus	Spleen	17.83370333	11.7813	TRUE	TRUE
CHS.10794.74	CHS.10794.19	ZNF384	577	608	0.949	57.6	54.6	1.0549	9662	552	Spleen	Spleen	32.2071578	11.7813	TRUE	TRUE
CHS.10794.75	CHS.10794.19	ZNF384	522	608	0.8586	59.4	54.6	1.0879	3	552	Testis	Spleen	2.84875	11.7813	TRUE	TRUE
CHS.10794.78	CHS.10794.19	ZNF384	468	608	0.7697	58.3	54.6	1.0678	0	552	-	Spleen	0	11.7813	TRUE	TRUE
CHS.10794.79	CHS.10794.19	ZNF384	447	608	0.7352	54.1	54.6	0.9908	0	552	-	Spleen	0	11.7813	TRUE	TRUE
CHS.10794.8	CHS.10794.19	ZNF384	547	608	0.8997	54.1	54.6	0.9908	806	552	Bladder	Spleen	12.064606	11.7813	TRUE	TRUE
CHS.10794.83	CHS.10794.19	ZNF384	524	608	0.8618	55.2	54.6	1.011	0	552	-	Spleen	0	11.7813	TRUE	TRUE
CHS.10794.86	CHS.10794.19	ZNF384	477	608	0.7845	58.1	54.6	1.0641	0	552	-	Spleen	0	11.7813	FALSE	TRUE
CHS.10796.20	CHS.10796.10	PIANP	282	276	1.0217	50	50.6	0.9881	525	4290	Ovary	Brain	6.507659	46.82415744	TRUE	TRUE
CHS.10796.7	CHS.10796.10	PIANP	282	276	1.0217	50	50.6	0.9881	3957	4290	Brain	Brain	46.72281632	46.82415744	TRUE	TRUE
CHS.10796.9	CHS.10796.10	PIANP	282	276	1.0217	50	50.6	0.9881	3957	4290	Brain	Brain	46.72281632	46.82415744	TRUE	TRUE
CHS.10800.1	CHS.10800.2	COPS7A	275	275	1	83.6	83.6	1	9784	9784	Bone_Marrow	Bone_Marrow	7.000863412	7.000863412	TRUE	TRUE
CHS.10800.10	CHS.10800.2	COPS7A	62	275	0.2255	71.4	83.6	0.8541	1070	9784	Vagina	Bone_Marrow	2.371143056	7.000863412	TRUE	TRUE
CHS.10800.12	CHS.10800.2	COPS7A	62	275	0.2255	71.4	83.6	0.8541	1070	9784	Vagina	Bone_Marrow	2.371143056	7.000863412	TRUE	TRUE
CHS.10800.18	CHS.10800.2	COPS7A	275	275	1	83.6	83.6	1	9784	9784	Bone_Marrow	Bone_Marrow	7.000863412	7.000863412	TRUE	TRUE
CHS.10800.19	CHS.10800.2	COPS7A	275	275	1	83.6	83.6	1	9784	9784	Bone_Marrow	Bone_Marrow	7.000863412	7.000863412	FALSE	TRUE
CHS.10800.27	CHS.10800.2	COPS7A	62	275	0.2255	71.4	83.6	0.8541	1163	9784	Uterus	Bone_Marrow	3.708527577	7.000863412	TRUE	TRUE
CHS.10800.3	CHS.10800.2	COPS7A	275	275	1	83.6	83.6	1	9784	9784	Bone_Marrow	Bone_Marrow	7.000863412	7.000863412	TRUE	TRUE
CHS.10802.22	CHS.10802.7	MLF2	248	248	1	65.8	65.8	1	8344	9786	Adrenal_Gland	Uterus	2.955281281	187.3113958	TRUE	TRUE
CHS.10802.6	CHS.10802.7	MLF2	248	248	1	65.8	65.8	1	8344	9786	Adrenal_Gland	Uterus	2.955281281	187.3113958	TRUE	TRUE
CHS.10804.5	CHS.10804.10	PTMS	104	102	1.0196	64.5	58.8	1.0969	9727	9787	Uterus	Uterus	72.70059271	953.5537604	TRUE	TRUE
CHS.10805.19	CHS.10805.8	LAG3	360	525	0.6857	81.5	76.8	1.0612	13	3361	Colon	Ovary	1.59245	30.61256366	TRUE	TRUE
CHS.10805.5	CHS.10805.8	LAG3	444	525	0.8457	76.7	76.8	0.9987	1	3361	Esophagus	Ovary	0.619735	30.61256366	TRUE	TRUE
CHS.10806.13	CHS.10806.2	CD4	185	458	0.4039	80	85.1	0.9401	1055	7520	Spleen	Spleen	4.891950714	135.4997008	FALSE	FALSE
CHS.10806.21	CHS.10806.2	CD4	403	458	0.8799	83.1	85.1	0.9765	68	7520	Brain	Spleen	4.8004475	135.4997008	FALSE	FALSE
CHS.10806.3	CHS.10806.2	CD4	185	458	0.4039	80	85.1	0.9401	1055	7520	Spleen	Spleen	4.891950714	135.4997008	FALSE	FALSE
CHS.10806.4	CHS.10806.2	CD4	279	458	0.6092	83.3	85.1	0.9788	1303	7520	Spleen	Spleen	7.220085528	135.4997008	FALSE	FALSE
CHS.10806.5	CHS.10806.2	CD4	185	458	0.4039	80	85.1	0.9401	1055	7520	Spleen	Spleen	4.891950714	135.4997008	FALSE	FALSE
CHS.10806.6	CHS.10806.2	CD4	185	458	0.4039	80	85.1	0.9401	1055	7520	Spleen	Spleen	4.891950714	135.4997008	FALSE	FALSE
CHS.10806.7	CHS.10806.2	CD4	185	458	0.4039	80	85.1	0.9401	1055	7520	Spleen	Spleen	4.891950714	135.4997008	FALSE	FALSE
CHS.10806.8	CHS.10806.2	CD4	458	458	1	85.1	85.1	1	112	7520	Spleen	Spleen	6.773773333	135.4997008	FALSE	FALSE
CHS.10807.16	CHS.10807.2	GPR162	345	588	0.5867	64.1	60.1	1.0666	3590	8047	Brain	Brain	84.19725531	58.24356021	TRUE	TRUE
CHS.10807.3	CHS.10807.2	GPR162	304	588	0.517	46.2	60.1	0.7687	6541	8047	Brain	Brain	10.93585667	58.24356021	TRUE	TRUE
CHS.10809.1	CHS.10809.2	GNB3	296	340	0.8706	96.1	96.3	0.9979	467	464	Pituitary	Pituitary	17.904375	59.28559487	TRUE	TRUE
CHS.10809.3	CHS.10809.2	GNB3	339	340	0.9971	95.5	96.3	0.9917	3134	464	Pituitary	Pituitary	67.82513665	59.28559487	TRUE	TRUE
CHS.10810.1	CHS.10810.2	P3H3	433	736	0.5883	85.9	80.8	1.0631	1110	8742	Cervix_Uteri	Pituitary	7.134485	98.67685192	TRUE	TRUE
CHS.10811.13	CHS.10811.18	CDCA3	219	268	0.8172	59.4	55.4	1.0722	1483	4016	Pituitary	Skin	15.64268792	1.972049659	FALSE	FALSE
CHS.10811.15	CHS.10811.18	CDCA3	243	268	0.9067	54	55.4	0.9747	1873	4016	Testis	Skin	1.125516725	1.972049659	FALSE	FALSE
CHS.10811.16	CHS.10811.18	CDCA3	182	268	0.6791	59.2	55.4	1.0686	3011	4016	Testis	Skin	1.273990653	1.972049659	FALSE	FALSE
CHS.10811.17	CHS.10811.18	CDCA3	190	268	0.709	58.1	55.4	1.0487	221	4016	Bone_Marrow	Skin	1.86126	1.972049659	FALSE	FALSE
CHS.10811.23	CHS.10811.18	CDCA3	268	268	1	55.4	55.4	1	1312	4016	Blood	Skin	18.67189721	1.972049659	FALSE	FALSE
CHS.10811.28	CHS.10811.18	CDCA3	105	268	0.3918	65.9	55.4	1.1895	1831	4016	Testis	Skin	1.10596955	1.972049659	FALSE	FALSE
CHS.10811.30	CHS.10811.18	CDCA3	113	268	0.4216	59	55.4	1.065	44	4016	Skin	Skin	2.954615	1.972049659	FALSE	FALSE
CHS.10812.19	CHS.10812.6	USP5	615	858	0.7168	81.8	80.2	1.02	794	9606	Testis	Muscle	3.184781667	43.35301319	TRUE	TRUE
CHS.10812.21	CHS.10812.6	USP5	420	858	0.4895	82.3	80.2	1.0262	10	9606	Nerve	Muscle	2.7152	43.35301319	TRUE	TRUE
CHS.10812.22	CHS.10812.6	USP5	816	858	0.951	78.6	80.2	0.98	4	9606	Muscle	Muscle	0.920846	43.35301319	TRUE	TRUE
CHS.10812.23	CHS.10812.6	USP5	521	858	0.6072	82.8	80.2	1.0324	1	9606	Bone_Marrow	Muscle	0.641198	43.35301319	TRUE	TRUE
CHS.10812.24	CHS.10812.6	USP5	834	858	0.972	79.3	80.2	0.9888	3	9606	Brain	Muscle	0.744992	43.35301319	TRUE	TRUE
CHS.10812.25	CHS.10812.6	USP5	716	858	0.8345	80.7	80.2	1.0062	1	9606	Brain	Muscle	2.38794	43.35301319	TRUE	TRUE
CHS.10812.26	CHS.10812.6	USP5	693	858	0.8077	82.8	80.2	1.0324	1	9606	Skin	Muscle	6.59148	43.35301319	TRUE	TRUE
CHS.10812.27	CHS.10812.6	USP5	632	858	0.7366	82.3	80.2	1.0262	0	9606	-	Muscle	0	43.35301319	FALSE	TRUE
CHS.10812.28	CHS.10812.6	USP5	531	858	0.6189	79.9	80.2	0.9963	0	9606	-	Muscle	0	43.35301319	TRUE	TRUE
CHS.10812.29	CHS.10812.6	USP5	604	858	0.704	79.1	80.2	0.9863	0	9606	-	Muscle	0	43.35301319	TRUE	TRUE
CHS.10812.30	CHS.10812.6	USP5	789	858	0.9196	80.1	80.2	0.9988	0	9606	-	Muscle	0	43.35301319	FALSE	TRUE
CHS.10812.5	CHS.10812.6	USP5	793	858	0.9242	80.1	80.2	0.9988	6	9606	Adipose_Tissue	Muscle	2.61515	43.35301319	TRUE	TRUE
CHS.10812.7	CHS.10812.6	USP5	835	858	0.9732	81	80.2	1.01	9766	9606	Testis	Muscle	64.0273715	43.35301319	TRUE	TRUE
CHS.10813.1	CHS.10813.18	TPI1	286	249	1.1486	87.5	87.5	1	9791	0	Bone_Marrow	-	726.1476373	0	TRUE	TRUE
CHS.10813.13	CHS.10813.18	TPI1	167	249	0.6707	94.9	87.5	1.0846	9529	0	Brain	-	11.80938911	0	TRUE	TRUE
CHS.10814.3	CHS.10814.4	SPSB2	263	263	1	86.8	86.8	1	7418	8817	Thyroid	Lung	15.66779322	11.22254739	FALSE	FALSE
CHS.10814.5	CHS.10814.4	SPSB2	263	263	1	86.8	86.8	1	7418	8817	Thyroid	Lung	15.66779322	11.22254739	FALSE	FALSE
CHS.10814.6	CHS.10814.4	SPSB2	267	263	1.0152	80.5	86.8	0.9274	22	8817	Lung	Lung	4.46621	11.22254739	FALSE	FALSE
CHS.10819.27	CHS.10819.5	LRRC23	181	343	0.5277	79.4	87.1	0.9116	1013	9237	Pancreas	Testis	1.57312	18.8607678	TRUE	FALSE
CHS.10819.28	CHS.10819.5	LRRC23	232	343	0.6764	80.9	87.1	0.9288	43	9237	Breast	Testis	1.68448	18.8607678	FALSE	FALSE
CHS.10819.31	CHS.10819.5	LRRC23	216	343	0.6297	85.2	87.1	0.9782	149	9237	Pituitary	Testis	4.67281	18.8607678	FALSE	FALSE
CHS.10819.36	CHS.10819.5	LRRC23	230	343	0.6706	81.1	87.1	0.9311	193	9237	Bone_Marrow	Testis	5.71021	18.8607678	FALSE	FALSE
CHS.10819.6	CHS.10819.5	LRRC23	343	343	1	87.1	87.1	1	9237	9237	Testis	Testis	18.8607678	18.8607678	FALSE	FALSE
CHS.10819.7	CHS.10819.5	LRRC23	312	343	0.9096	78	87.1	0.8955	8638	9237	Testis	Testis	4.598932444	18.8607678	FALSE	FALSE
CHS.1082.1	CHS.1082.2	KHDRBS1	381	443	0.86	64.1	60.6	1.0578	8825	9794	Bone_Marrow	Bone_Marrow	17.13323119	179.8694608	FALSE	TRUE
CHS.1082.3	CHS.1082.2	KHDRBS1	404	443	0.912	58.4	60.6	0.9637	9330	9794	Bone_Marrow	Bone_Marrow	3.773091569	179.8694608	TRUE	TRUE
CHS.1082.4	CHS.1082.2	KHDRBS1	443	443	1	60.6	60.6	1	9692	9794	Nerve	Bone_Marrow	19.70985876	179.8694608	TRUE	TRUE
CHS.10821.1	CHS.10821.2	ENO2	434	434	1	97.3	97.3	1	8016	9543	Pituitary	Brain	90.3817371	410.89455	TRUE	TRUE
CHS.10821.21	CHS.10821.2	ENO2	434	434	1	97.3	97.3	1	2267	9543	Blood_Vessel	Brain	33.54021192	410.89455	TRUE	TRUE
CHS.10821.22	CHS.10821.2	ENO2	374	434	0.8618	93.6	97.3	0.962	39	9543	Blood_Vessel	Brain	4.5186675	410.89455	TRUE	TRUE
CHS.10822.20	CHS.10822.12	ATN1	1190	1190	1	48.2	48.2	1	3585	9754	Pituitary	Ovary	39.54352963	296.7550821	FALSE	FALSE
CHS.10826.1	CHS.10826.8	C12orf57	113	126	0.8968	80.2	80.6	0.995	4022	9787	Bone_Marrow	Ovary	5.372061426	368.5530813	TRUE	TRUE
CHS.10826.2	CHS.10826.8	C12orf57	126	126	1	80.6	80.6	1	3747	9787	Pituitary	Ovary	5.900740728	368.5530813	TRUE	TRUE
CHS.10826.4	CHS.10826.8	C12orf57	103	126	0.8175	74.6	80.6	0.9256	2	9787	Skin	Ovary	9.952	368.5530813	TRUE	TRUE
CHS.10826.6	CHS.10826.8	C12orf57	91	126	0.7222	81.2	80.6	1.0074	9687	9787	Pituitary	Ovary	58.46859769	368.5530813	TRUE	TRUE
CHS.10826.7	CHS.10826.8	C12orf57	62	126	0.4921	76.1	80.6	0.9442	55	9787	Nerve	Ovary	8.33563	368.5530813	FALSE	TRUE
CHS.10826.9	CHS.10826.8	C12orf57	97	126	0.7698	67.6	80.6	0.8387	9783	9787	Blood_Vessel	Ovary	42.79790399	368.5530813	TRUE	TRUE
CHS.10827.5	CHS.10827.8	PTPN6	597	595	1.0034	84.5	86.6	0.9758	5574	8306	Adrenal_Gland	Spleen	22.36591997	265.3561237	TRUE	TRUE
CHS.10827.7	CHS.10827.8	PTPN6	624	595	1.0487	82.6	86.6	0.9538	3981	8306	Spleen	Spleen	36.16153136	265.3561237	TRUE	TRUE
CHS.10830.12	CHS.10830.10	PHB2	219	299	0.7324	86.7	85.4	1.0152	96	9787	Skin	Ovary	6.910756667	318.8174554	TRUE	TRUE
CHS.10830.17	CHS.10830.10	PHB2	288	299	0.9632	82.4	85.4	0.9649	3	9787	Blood	Ovary	37.1009	318.8174554	TRUE	TRUE
CHS.10830.18	CHS.10830.10	PHB2	213	299	0.7124	85.4	85.4	1	3	9787	Brain	Ovary	30.72686667	318.8174554	TRUE	TRUE
CHS.10830.9	CHS.10830.10	PHB2	261	299	0.8729	82.7	85.4	0.9684	9761	9787	Ovary	Ovary	22.48198536	318.8174554	TRUE	TRUE
CHS.10831.16	CHS.10831.1	EMG1	229	244	0.9385	76	85.7	0.8868	774	9780	Thyroid	Thyroid	5.873310763	16.87161525	TRUE	TRUE
CHS.10831.18	CHS.10831.1	EMG1	223	244	0.9139	73.3	85.7	0.8553	1176	9780	Fallopian_Tube	Thyroid	5.565086667	16.87161525	FALSE	TRUE
CHS.10831.2	CHS.10831.1	EMG1	194	244	0.7951	74.9	85.7	0.874	9200	9780	Fallopian_Tube	Thyroid	1.079793857	16.87161525	TRUE	TRUE
CHS.10831.3	CHS.10831.1	EMG1	222	244	0.9098	79.2	85.7	0.9242	2908	9780	Thyroid	Thyroid	1.378100316	16.87161525	FALSE	TRUE
CHS.10832.17	CHS.10832.2	LPCAT3	511	487	1.0493	86	91.3	0.9419	2	9740	Brain	Adrenal_Gland	7.137835	75.38996832	FALSE	FALSE
CHS.10833.1	CHS.10833.2	C1S	688	688	1	86.8	86.8	1	9361	9361	Ovary	Ovary	703.5119821	703.5119821	FALSE	FALSE
CHS.10833.7	CHS.10833.2	C1S	521	688	0.7573	89.1	86.8	1.0265	7524	9361	Ovary	Ovary	17.00145598	703.5119821	FALSE	FALSE
CHS.10834.13	CHS.10834.2	C1R	719	705	1.0199	85.8	86.5	0.9919	6239	9723	Liver	Ovary	96.72697326	993.0483393	FALSE	FALSE
CHS.10834.17	CHS.10834.2	C1R	531	705	0.7532	87.6	86.5	1.0127	1	9723	Brain	Ovary	0.878454	993.0483393	FALSE	FALSE
CHS.10835.21	CHS.10835.5	C1RL	187	487	0.384	77	79	0.9747	9509	9285	Nerve	Adrenal_Gland	7.00484954	69.6277977	TRUE	TRUE
CHS.10835.25	CHS.10835.5	C1RL	333	487	0.6838	60.5	79	0.7658	1017	9285	Adrenal_Gland	Adrenal_Gland	8.582361925	69.6277977	FALSE	TRUE
CHS.10835.4	CHS.10835.5	C1RL	445	487	0.9138	81.6	79	1.0329	7974	9285	Adrenal_Gland	Adrenal_Gland	3.894109263	69.6277977	TRUE	TRUE
CHS.10835.6	CHS.10835.5	C1RL	314	487	0.6448	89.8	79	1.1367	6524	9285	Adrenal_Gland	Adrenal_Gland	10.02796736	69.6277977	TRUE	TRUE
CHS.10837.13	CHS.10837.3	RBP5	97	135	0.7185	80.6	95.9	0.8405	147	6277	Liver	Kidney	6.647871455	246.4526986	FALSE	FALSE
CHS.10837.22	CHS.10837.3	RBP5	86	135	0.637	94.1	95.9	0.9812	614	6277	Kidney	Kidney	7397.49	246.4526986	FALSE	FALSE
CHS.10838.12	CHS.10838.3	CLSTN3	968	956	1.0126	76.1	77.8	0.9781	9618	9603	Spleen	Brain	10.86463949	97.28813395	TRUE	TRUE
CHS.10838.31	CHS.10838.3	CLSTN3	364	956	0.3808	51.9	77.8	0.6671	1486	9603	Breast	Brain	13.66966014	97.28813395	TRUE	TRUE
CHS.1084.11	CHS.1084.10	TMEM39B	293	492	0.5955	70.6	70.7	0.9986	6775	9364	Bone_Marrow	Uterus	4.221915743	19.99284865	TRUE	TRUE
CHS.1084.12	CHS.1084.10	TMEM39B	293	492	0.5955	70.6	70.7	0.9986	6775	9364	Bone_Marrow	Uterus	4.221915743	19.99284865	TRUE	TRUE
CHS.1084.18	CHS.1084.10	TMEM39B	365	492	0.7419	74.4	70.7	1.0523	3570	9364	Blood_Vessel	Uterus	0.845078978	19.99284865	FALSE	TRUE
CHS.1084.19	CHS.1084.10	TMEM39B	377	492	0.7663	76.6	70.7	1.0835	686	9364	Nerve	Uterus	5.238571667	19.99284865	TRUE	TRUE
CHS.1084.2	CHS.1084.10	TMEM39B	365	492	0.7419	74.4	70.7	1.0523	3570	9364	Blood_Vessel	Uterus	0.845078978	19.99284865	TRUE	TRUE
CHS.10840.1	CHS.10840.19	PEX5	602	639	0.9421	70.8	71.5	0.9902	9563	9317	Muscle	Testis	5.951642634	11.42831125	TRUE	FALSE
CHS.10840.10	CHS.10840.19	PEX5	639	639	1	71.5	71.5	1	9317	9317	Testis	Testis	11.42831125	11.42831125	FALSE	FALSE
CHS.10840.11	CHS.10840.19	PEX5	654	639	1.0235	70.2	71.5	0.9818	9389	9317	Testis	Testis	13.6014945	11.42831125	FALSE	FALSE
CHS.10840.12	CHS.10840.19	PEX5	602	639	0.9421	70.8	71.5	0.9902	9563	9317	Muscle	Testis	5.951642634	11.42831125	FALSE	FALSE
CHS.10840.13	CHS.10840.19	PEX5	639	639	1	71.5	71.5	1	9317	9317	Testis	Testis	11.42831125	11.42831125	FALSE	FALSE
CHS.10840.14	CHS.10840.19	PEX5	602	639	0.9421	70.8	71.5	0.9902	9563	9317	Muscle	Testis	5.951642634	11.42831125	FALSE	FALSE
CHS.10840.15	CHS.10840.19	PEX5	639	639	1	71.5	71.5	1	9317	9317	Testis	Testis	11.42831125	11.42831125	FALSE	FALSE
CHS.10840.16	CHS.10840.19	PEX5	602	639	0.9421	70.8	71.5	0.9902	9563	9317	Muscle	Testis	5.951642634	11.42831125	FALSE	FALSE
CHS.10840.17	CHS.10840.19	PEX5	594	639	0.9296	71.6	71.5	1.0014	27	9317	Adipose_Tissue	Testis	2.646945	11.42831125	FALSE	FALSE
CHS.10840.20	CHS.10840.19	PEX5	631	639	0.9875	71.5	71.5	1	9066	9317	Pituitary	Testis	12.88814233	11.42831125	FALSE	FALSE
CHS.10840.21	CHS.10840.19	PEX5	594	639	0.9296	71.6	71.5	1.0014	27	9317	Adipose_Tissue	Testis	2.646945	11.42831125	FALSE	FALSE
CHS.10840.25	CHS.10840.19	PEX5	602	639	0.9421	70.8	71.5	0.9902	9563	9317	Muscle	Testis	5.951642634	11.42831125	TRUE	FALSE
CHS.10840.27	CHS.10840.19	PEX5	594	639	0.9296	71.6	71.5	1.0014	27	9317	Adipose_Tissue	Testis	2.646945	11.42831125	FALSE	FALSE
CHS.10840.31	CHS.10840.19	PEX5	602	639	0.9421	70.8	71.5	0.9902	9563	9317	Muscle	Testis	5.951642634	11.42831125	TRUE	FALSE
CHS.10840.33	CHS.10840.19	PEX5	617	639	0.9656	70.1	71.5	0.9804	315	9317	Pituitary	Testis	11.77085667	11.42831125	FALSE	FALSE
CHS.10840.34	CHS.10840.19	PEX5	631	639	0.9875	71.5	71.5	1	9066	9317	Pituitary	Testis	12.88814233	11.42831125	FALSE	FALSE
CHS.10840.37	CHS.10840.19	PEX5	636	639	0.9953	70.9	71.5	0.9916	7	9317	Skin	Testis	1.92038	11.42831125	FALSE	FALSE
CHS.10840.39	CHS.10840.19	PEX5	602	639	0.9421	70.8	71.5	0.9902	9563	9317	Muscle	Testis	5.951642634	11.42831125	FALSE	FALSE
CHS.10840.41	CHS.10840.19	PEX5	602	639	0.9421	70.8	71.5	0.9902	9563	9317	Muscle	Testis	5.951642634	11.42831125	FALSE	FALSE
CHS.10840.5	CHS.10840.19	PEX5	639	639	1	71.5	71.5	1	9317	9317	Testis	Testis	11.42831125	11.42831125	FALSE	FALSE
CHS.10840.6	CHS.10840.19	PEX5	639	639	1	71.5	71.5	1	9317	9317	Testis	Testis	11.42831125	11.42831125	FALSE	FALSE
CHS.10840.7	CHS.10840.19	PEX5	602	639	0.9421	70.8	71.5	0.9902	9563	9317	Muscle	Testis	5.951642634	11.42831125	FALSE	FALSE
CHS.10840.9	CHS.10840.19	PEX5	617	639	0.9656	70.1	71.5	0.9804	315	9317	Pituitary	Testis	11.77085667	11.42831125	FALSE	FALSE
CHS.10842.2	CHS.10842.1	ACSM4	289	580	0.4983	87.2	90.1	0.9678	85	0	Testis	-	2.285425165	0	FALSE	FALSE
CHS.10843.30	CHS.10843.15	CD163L1	941	1453	0.6476	75.8	73.5	1.0313	16	1110	Lung	Spleen	2.36722	21.68272597	FALSE	FALSE
CHS.10849.1	CHS.10849.2	APOBEC1	191	236	0.8093	84.2	84.9	0.9918	219	181	Small_Intestine	Small_Intestine	11.87987143	19.70795238	FALSE	FALSE
CHS.1085.14	CHS.1085.6	KPNA6	566	536	1.056	83.5	85.5	0.9766	195	9459	Testis	Bone_Marrow	11.2721123	30.93517683	TRUE	TRUE
CHS.10852.10	CHS.10852.6	CLEC4C	176	213	0.8263	89.8	90.4	0.9934	1	173	Testis	Blood	0.887802	1.636115882	FALSE	FALSE
CHS.10852.11	CHS.10852.6	CLEC4C	213	213	1	90.4	90.4	1	37	173	Testis	Blood	1.44572173	1.636115882	FALSE	FALSE
CHS.10852.3	CHS.10852.6	CLEC4C	182	213	0.8545	88.1	90.4	0.9746	35	173	Blood	Blood	0.609136471	1.636115882	FALSE	FALSE
CHS.10852.4	CHS.10852.6	CLEC4C	213	213	1	90.4	90.4	1	156	173	Lung	Blood	1.21458	1.636115882	FALSE	FALSE
CHS.10852.8	CHS.10852.6	CLEC4C	166	213	0.7793	88	90.4	0.9735	1	173	Blood	Blood	0.341049	1.636115882	FALSE	FALSE
CHS.10855.3	CHS.10855.2	NANOG	289	305	0.9475	53.6	53.1	1.0094	139	154	Testis	Nerve	0.64466791	0.142556333	FALSE	FALSE
CHS.10856.10	CHS.10856.5	SLC2A14	535	497	1.0765	85.1	87.2	0.9759	474	413	Blood	Testis	18.448861	21.32305697	FALSE	FALSE
CHS.10856.3	CHS.10856.5	SLC2A14	520	497	1.0463	85.5	87.2	0.9805	228	413	Testis	Testis	3.508859078	21.32305697	FALSE	FALSE
CHS.10856.4	CHS.10856.5	SLC2A14	411	497	0.827	86	87.2	0.9862	248	413	Testis	Testis	2.96709362	21.32305697	FALSE	FALSE
CHS.10856.42	CHS.10856.5	SLC2A14	168	497	0.338	72.8	87.2	0.8349	4896	413	Bone_Marrow	Testis	60.1623236	21.32305697	FALSE	FALSE
CHS.10856.6	CHS.10856.5	SLC2A14	497	497	1	87.2	87.2	1	173	413	Testis	Testis	7.54477625	21.32305697	FALSE	FALSE
CHS.10856.7	CHS.10856.5	SLC2A14	520	497	1.0463	85.5	87.2	0.9805	228	413	Testis	Testis	3.508859078	21.32305697	FALSE	FALSE
CHS.10869.1	CHS.10869.2	C3AR1	482	482	1	66.4	66.4	1	1610	8616	Blood	Blood	0.684356535	31.24728441	FALSE	TRUE
CHS.10869.4	CHS.10869.2	C3AR1	482	482	1	66.4	66.4	1	1610	8616	Blood	Blood	0.684356535	31.24728441	TRUE	TRUE
CHS.1087.12	CHS.1087.10	TXLNA	546	546	1	70.5	70.5	1	9707	9707	Testis	Testis	33.41713671	33.41713671	TRUE	TRUE
CHS.1087.17	CHS.1087.10	TXLNA	464	546	0.8498	74.3	70.5	1.0539	234	9707	Heart	Testis	8.87779	33.41713671	TRUE	TRUE
CHS.1087.4	CHS.1087.10	TXLNA	371	546	0.6795	82.4	70.5	1.1688	141	9707	Lung	Testis	3.048756667	33.41713671	TRUE	TRUE
CHS.1087.6	CHS.1087.10	TXLNA	371	546	0.6795	82.4	70.5	1.1688	141	9707	Lung	Testis	3.048756667	33.41713671	FALSE	TRUE
CHS.1087.8	CHS.1087.10	TXLNA	386	546	0.707	79	70.5	1.1206	96	9707	Spleen	Testis	3.942865	33.41713671	TRUE	TRUE
CHS.10871.13	CHS.10871.1	NECAP1	192	275	0.6982	70	65.7	1.0654	81	9748	Lung	Brain	6.3901425	69.19394624	FALSE	FALSE
CHS.10871.2	CHS.10871.1	NECAP1	133	275	0.4836	57.8	65.7	0.8798	9135	9748	Nerve	Brain	6.935264245	69.19394624	FALSE	FALSE
CHS.10872.4	CHS.10872.3	CLEC4A	204	237	0.8608	83.2	83.1	1.0012	1132	4963	Prostate	Blood	1.2403515	14.57745367	TRUE	TRUE
CHS.10872.5	CHS.10872.3	CLEC4A	198	237	0.8354	81.8	83.1	0.9844	1575	4963	Thyroid	Blood	1.412859405	14.57745367	TRUE	TRUE
CHS.10872.6	CHS.10872.3	CLEC4A	165	237	0.6962	86.7	83.1	1.0433	3480	4963	Vagina	Blood	1.364114553	14.57745367	TRUE	TRUE
CHS.10872.8	CHS.10872.3	CLEC4A	200	237	0.8439	82	83.1	0.9868	91	4963	Vagina	Blood	3.72898	14.57745367	TRUE	TRUE
CHS.10877.1	CHS.10877.2	FAM90A1	464	464	1	43.3	43.3	1	126	126	Adipose_Tissue	Adipose_Tissue	1.51281	1.51281	FALSE	FALSE
CHS.10877.3	CHS.10877.2	FAM90A1	483	464	1.0409	41.2	43.3	0.9515	757	126	Fallopian_Tube	Adipose_Tissue	2.89294	1.51281	FALSE	FALSE
CHS.10877.6	CHS.10877.2	FAM90A1	404	464	0.8707	44.5	43.3	1.0277	473	126	Pituitary	Adipose_Tissue	2.454779646	1.51281	FALSE	FALSE
CHS.10877.7	CHS.10877.2	FAM90A1	464	464	1	43.3	43.3	1	453	126	Ovary	Adipose_Tissue	4.16408	1.51281	FALSE	FALSE
CHS.1088.11	CHS.1088.4	CCDC28B	169	200	0.845	70.8	67.5	1.0489	4	9627	Brain	Muscle	2.95697	46.05547388	TRUE	TRUE
CHS.1088.2	CHS.1088.4	CCDC28B	115	200	0.575	66.1	67.5	0.9793	1111	9627	Muscle	Muscle	8.148378841	46.05547388	TRUE	TRUE
CHS.1088.3	CHS.1088.4	CCDC28B	241	200	1.205	60.6	67.5	0.8978	9621	9627	Testis	Muscle	12.73044662	46.05547388	TRUE	TRUE
CHS.10886.2	CHS.10886.1	CLEC6A	179	209	0.8565	86.9	88.7	0.9797	4	146	Blood	Blood	0.689196333	0.913745731	FALSE	FALSE
CHS.10888.14	CHS.10888.3	CLEC4E	109	219	0.4977	90.6	84.2	1.076	1746	6211	Spleen	Blood	5.550409663	72.55970566	FALSE	TRUE
CHS.10888.4	CHS.10888.3	CLEC4E	174	219	0.7945	70.8	84.2	0.8409	3397	6211	Blood	Blood	8.43715527	72.55970566	TRUE	TRUE
CHS.1089.13	CHS.1089.28	TMEM234	172	140	1.2286	74.6	83.9	0.8892	1	9571	Esophagus	Thyroid	0.585962	13.52995625	TRUE	TRUE
CHS.1089.16	CHS.1089.28	TMEM234	164	140	1.1714	67.9	83.9	0.8093	9069	9571	Thyroid	Thyroid	34.05079086	13.52995625	TRUE	TRUE
CHS.1089.22	CHS.1089.28	TMEM234	164	140	1.1714	67.9	83.9	0.8093	8803	9571	Thyroid	Thyroid	5.272514496	13.52995625	FALSE	TRUE
CHS.1089.23	CHS.1089.28	TMEM234	96	140	0.6857	65	83.9	0.7747	8635	9571	Thyroid	Thyroid	6.996074482	13.52995625	FALSE	TRUE
CHS.1089.52	CHS.1089.28	TMEM234	164	140	1.1714	67.9	83.9	0.8093	9069	9571	Thyroid	Thyroid	34.05079086	13.52995625	FALSE	TRUE
CHS.10892.12	CHS.10892.1	AICDA	229	198	1.1566	79.4	86.7	0.9158	7	192	Small_Intestine	Blood	1.424974571	43.7424796	TRUE	TRUE
CHS.10892.13	CHS.10892.1	AICDA	182	198	0.9192	72.2	86.7	0.8328	6	192	Adipose_Tissue	Blood	1.4101675	43.7424796	TRUE	TRUE
CHS.10892.3	CHS.10892.1	AICDA	188	198	0.9495	81.8	86.7	0.9435	172	192	Blood	Blood	31.59861796	43.7424796	TRUE	TRUE
CHS.10892.6	CHS.10892.1	AICDA	145	198	0.7323	86	86.7	0.9919	73	192	Blood	Blood	3.917128222	43.7424796	TRUE	TRUE
CHS.10895.14	CHS.10895.8	MFAP5	173	173	1	62.2	62.2	1	891	7330	Uterus	Nerve	36.51169693	129.9825544	FALSE	FALSE
CHS.10895.3	CHS.10895.8	MFAP5	151	173	0.8728	64.7	62.2	1.0402	5610	7330	Nerve	Nerve	5.594632139	129.9825544	FALSE	FALSE
CHS.10895.4	CHS.10895.8	MFAP5	148	173	0.8555	65.1	62.2	1.0466	5015	7330	Uterus	Nerve	7.820302759	129.9825544	FALSE	FALSE
CHS.10895.5	CHS.10895.8	MFAP5	109	173	0.6301	57.6	62.2	0.926	3824	7330	Nerve	Nerve	0.943667439	129.9825544	FALSE	FALSE
CHS.10895.6	CHS.10895.8	MFAP5	163	173	0.9422	63	62.2	1.0129	7181	7330	Nerve	Nerve	48.19176599	129.9825544	TRUE	FALSE
CHS.10895.7	CHS.10895.8	MFAP5	128	173	0.7399	66.5	62.2	1.0691	5525	7330	Nerve	Nerve	15.57804607	129.9825544	FALSE	FALSE
CHS.10895.9	CHS.10895.8	MFAP5	138	173	0.7977	64.4	62.2	1.0354	5569	7330	Uterus	Nerve	23.14211963	129.9825544	FALSE	FALSE
CHS.10897.14	CHS.10897.28	RIMKLB	386	386	1	81.8	81.8	1	6816	9454	Testis	Testis	3.204356495	4.056409986	FALSE	TRUE
CHS.10897.21	CHS.10897.28	RIMKLB	386	386	1	81.8	81.8	1	6816	9454	Testis	Testis	3.204356495	4.056409986	FALSE	TRUE
CHS.10897.29	CHS.10897.28	RIMKLB	386	386	1	81.8	81.8	1	4516	9454	Fallopian_Tube	Testis	24.8033	4.056409986	FALSE	TRUE
CHS.10897.6	CHS.10897.28	RIMKLB	307	386	0.7953	86.4	81.8	1.0562	6423	9454	Adipose_Tissue	Testis	10.89929135	4.056409986	FALSE	TRUE
CHS.10897.76	CHS.10897.28	RIMKLB	287	386	0.7435	89.7	81.8	1.0966	88	9454	Blood_Vessel	Testis	5.927598571	4.056409986	TRUE	TRUE
CHS.10897.77	CHS.10897.28	RIMKLB	300	386	0.7772	89.2	81.8	1.0905	57	9454	Blood_Vessel	Testis	7.5963175	4.056409986	TRUE	TRUE
CHS.1090.1	CHS.1090.2	IQCC	546	466	1.1717	44.8	48	0.9333	1688	6401	Pituitary	Testis	3.936094027	16.69345945	FALSE	FALSE
CHS.10900.22	CHS.10900.1	A2ML1	963	1454	0.6623	82	80.9	1.0136	565	1193	Uterus	Cervix_Uteri	3.63563	604.851	FALSE	FALSE
CHS.10900.31	CHS.10900.1	A2ML1	966	1454	0.6644	82.4	80.9	1.0185	128	1193	Testis	Cervix_Uteri	3.3375975	604.851	FALSE	FALSE
CHS.10902.13	CHS.10902.14	PHC1	996	1004	0.992	43.1	49.1	0.8778	1603	9480	Pituitary	Pituitary	12.30411714	71.74952154	TRUE	TRUE
CHS.10902.19	CHS.10902.14	PHC1	954	1004	0.9502	44.5	49.1	0.9063	1197	9480	Uterus	Pituitary	7.3431825	71.74952154	TRUE	TRUE
CHS.10903.1	CHS.10903.6	M6PR	244	277	0.8809	87.3	83.7	1.043	502	9784	Lung	Spleen	36.66295963	76.02311271	TRUE	TRUE
CHS.10903.5	CHS.10903.6	M6PR	191	277	0.6895	77.3	83.7	0.9235	8052	9784	Spleen	Spleen	1.012435973	76.02311271	TRUE	TRUE
CHS.10904.1	CHS.10904.14	KLRG1	110	189	0.582	93.3	82.1	1.1364	3632	3195	Spleen	Spleen	1.911098716	5.857566368	TRUE	TRUE
CHS.10904.19	CHS.10904.14	KLRG1	110	189	0.582	93.3	82.1	1.1364	3632	3195	Spleen	Spleen	1.911098716	5.857566368	FALSE	TRUE
CHS.10904.20	CHS.10904.14	KLRG1	110	189	0.582	93.3	82.1	1.1364	3632	3195	Spleen	Spleen	1.911098716	5.857566368	FALSE	TRUE
CHS.10904.21	CHS.10904.14	KLRG1	195	189	1.0317	80.6	82.1	0.9817	338	3195	Nerve	Spleen	0.437476	5.857566368	TRUE	TRUE
CHS.10904.45	CHS.10904.14	KLRG1	70	189	0.3704	73.4	82.1	0.894	542	3195	Prostate	Spleen	1.6015866	5.857566368	TRUE	TRUE
CHS.10904.7	CHS.10904.14	KLRG1	199	189	1.0529	80.1	82.1	0.9756	6	3195	Lung	Spleen	2.08886	5.857566368	TRUE	TRUE
CHS.10911.11	CHS.10911.9	PZP	679	1482	0.4582	86.6	81.2	1.0665	63	200	Testis	Liver	6.46825746	29.71099662	FALSE	FALSE
CHS.10911.21	CHS.10911.9	PZP	619	1482	0.4177	86.5	81.2	1.0653	100	200	Testis	Liver	5.30056	29.71099662	FALSE	FALSE
CHS.10911.24	CHS.10911.9	PZP	596	1482	0.4022	86.6	81.2	1.0665	43	200	Lung	Liver	7.840217778	29.71099662	FALSE	FALSE
CHS.1092.21	CHS.1092.29	EIF3I	308	325	0.9477	89	89.9	0.99	3	7643	Blood	Bone_Marrow	1.725897667	475.3246774	FALSE	TRUE
CHS.1092.23	CHS.1092.29	EIF3I	249	325	0.7662	88.8	89.9	0.9878	587	7643	Testis	Bone_Marrow	28.6793	475.3246774	TRUE	TRUE
CHS.1092.24	CHS.1092.29	EIF3I	324	325	0.9969	91.5	89.9	1.0178	1394	7643	Bone_Marrow	Bone_Marrow	67.66774273	475.3246774	FALSE	TRUE
CHS.1092.27	CHS.1092.29	EIF3I	252	325	0.7754	89.5	89.9	0.9956	25	7643	Prostate	Bone_Marrow	41.307	475.3246774	FALSE	TRUE
CHS.1092.28	CHS.1092.29	EIF3I	270	325	0.8308	85.6	89.9	0.9522	65	7643	Nerve	Bone_Marrow	18.836282	475.3246774	TRUE	TRUE
CHS.1092.32	CHS.1092.29	EIF3I	299	325	0.92	89.3	89.9	0.9933	1	7643	Brain	Bone_Marrow	24.1367	475.3246774	TRUE	TRUE
CHS.1092.33	CHS.1092.29	EIF3I	275	325	0.8462	85.8	89.9	0.9544	19	7643	Liver	Bone_Marrow	27.7532	475.3246774	TRUE	TRUE
CHS.1092.34	CHS.1092.29	EIF3I	268	325	0.8246	87.4	89.9	0.9722	2	7643	Ovary	Bone_Marrow	141.672	475.3246774	TRUE	TRUE
CHS.1092.38	CHS.1092.29	EIF3I	222	325	0.6831	81.7	89.9	0.9088	18	7643	Colon	Bone_Marrow	8.88319	475.3246774	TRUE	TRUE
CHS.1092.39	CHS.1092.29	EIF3I	438	325	1.3477	68.5	89.9	0.762	0	7643	-	Bone_Marrow	0	475.3246774	FALSE	TRUE
CHS.1092.8	CHS.1092.29	EIF3I	91	325	0.28	90.7	89.9	1.0089	2238	7643	Skin	Bone_Marrow	15.70634307	475.3246774	TRUE	TRUE
CHS.10933.10	CHS.10933.5	CLEC2D	154	191	0.8063	79.8	84.9	0.9399	123	4456	Blood	Blood	14.46730248	6.527683775	FALSE	FALSE
CHS.10933.3	CHS.10933.5	CLEC2D	122	191	0.6387	73.5	84.9	0.8657	1318	4456	Blood	Blood	0.557486679	6.527683775	FALSE	FALSE
CHS.10933.4	CHS.10933.5	CLEC2D	194	191	1.0157	76	84.9	0.8952	3457	4456	Blood	Blood	5.530423386	6.527683775	FALSE	FALSE
CHS.10933.6	CHS.10933.5	CLEC2D	132	191	0.6911	72.9	84.9	0.8587	2511	4456	Spleen	Blood	0.775439818	6.527683775	FALSE	FALSE
CHS.10933.7	CHS.10933.5	CLEC2D	154	191	0.8063	84.7	84.9	0.9976	2495	4456	Blood	Blood	0.769534558	6.527683775	FALSE	FALSE
CHS.10933.8	CHS.10933.5	CLEC2D	95	191	0.4974	70.6	84.9	0.8316	1599	4456	Kidney	Blood	0.364158	6.527683775	FALSE	FALSE
CHS.10939.4	CHS.10939.1	CD69	164	199	0.8241	76.4	79.9	0.9562	900	6683	Lung	Spleen	8.155396944	48.36197949	TRUE	TRUE
CHS.10944.10	CHS.10944.7	KLRF1	64	231	0.2771	75.2	74.7	1.0067	197	1706	Thyroid	Spleen	0.681166	15.87634678	FALSE	FALSE
CHS.10944.14	CHS.10944.7	KLRF1	100	231	0.4329	90.4	74.7	1.2102	229	1706	Spleen	Spleen	3.09109	15.87634678	FALSE	FALSE
CHS.10944.2	CHS.10944.7	KLRF1	124	231	0.5368	57.8	74.7	0.7738	285	1706	Uterus	Spleen	1.32501	15.87634678	FALSE	FALSE
CHS.10944.3	CHS.10944.7	KLRF1	128	231	0.5541	56	74.7	0.7497	625	1706	Spleen	Spleen	1.659141182	15.87634678	FALSE	FALSE
CHS.10944.5	CHS.10944.7	KLRF1	114	231	0.4935	60.2	74.7	0.8059	459	1706	Spleen	Spleen	1.005336295	15.87634678	FALSE	FALSE
CHS.10944.8	CHS.10944.7	KLRF1	181	231	0.7835	83.3	74.7	1.1151	385	1706	Uterus	Spleen	1.403156	15.87634678	FALSE	FALSE
CHS.10944.9	CHS.10944.7	KLRF1	78	231	0.3377	72.8	74.7	0.9746	429	1706	Nerve	Spleen	0.4977085	15.87634678	FALSE	FALSE
CHS.10945.19	CHS.10945.5	CLEC2B	71	149	0.4765	85.5	91.1	0.9385	1414	9725	Lung	Skin	4.432721333	32.01910637	FALSE	FALSE
CHS.10948.1	CHS.10948.6	CLEC2A	136	174	0.7816	83.9	85.6	0.9801	57	764	Skin	Skin	3.568466157	5.581523125	FALSE	FALSE
CHS.10948.11	CHS.10948.6	CLEC2A	146	174	0.8391	85	85.6	0.993	157	764	Esophagus	Skin	10.2893	5.581523125	FALSE	FALSE
CHS.10948.2	CHS.10948.6	CLEC2A	132	174	0.7586	69.8	85.6	0.8154	80	764	Skin	Skin	3.082516197	5.581523125	FALSE	FALSE
CHS.10948.3	CHS.10948.6	CLEC2A	165	174	0.9483	78.5	85.6	0.9171	279	764	Blood_Vessel	Skin	5.37107	5.581523125	FALSE	FALSE
CHS.10948.4	CHS.10948.6	CLEC2A	160	174	0.9195	78.7	85.6	0.9194	707	764	Esophagus	Skin	29.275	5.581523125	FALSE	FALSE
CHS.10948.7	CHS.10948.6	CLEC2A	139	174	0.7989	84.4	85.6	0.986	93	764	Nerve	Skin	12.2136	5.581523125	FALSE	FALSE
CHS.10951.1	CHS.10951.9	CLEC12A	275	265	1.0377	80.4	82.4	0.9757	1087	3356	Spleen	Blood	2.81688912	28.35971168	TRUE	TRUE
CHS.10951.10	CHS.10951.9	CLEC12A	232	265	0.8755	84.6	82.4	1.0267	1748	3356	Blood	Blood	3.052552794	28.35971168	TRUE	TRUE
CHS.10951.2	CHS.10951.9	CLEC12A	265	265	1	82.4	82.4	1	578	3356	Blood	Blood	13.22063317	28.35971168	TRUE	TRUE
CHS.10951.5	CHS.10951.9	CLEC12A	232	265	0.8755	76.6	82.4	0.9296	15	3356	Blood	Blood	4.89736975	28.35971168	TRUE	TRUE
CHS.10951.6	CHS.10951.9	CLEC12A	231	265	0.8717	73.5	82.4	0.892	34	3356	Blood	Blood	4.91384992	28.35971168	TRUE	TRUE
CHS.10951.8	CHS.10951.9	CLEC12A	213	265	0.8038	77.6	82.4	0.9417	1833	3356	Spleen	Blood	3.491136409	28.35971168	TRUE	TRUE
CHS.10952.2	CHS.10952.5	CLEC1B	189	229	0.8253	82.8	87.8	0.9431	24	1063	Liver	Liver	2.837216	11.54150301	FALSE	FALSE
CHS.10952.4	CHS.10952.5	CLEC1B	196	229	0.8559	88.3	87.8	1.0057	246	1063	Liver	Liver	0.784290406	11.54150301	FALSE	FALSE
CHS.10952.6	CHS.10952.5	CLEC1B	229	229	1	87.8	87.8	1	342	1063	Liver	Liver	9.506138	11.54150301	FALSE	FALSE
CHS.10952.7	CHS.10952.5	CLEC1B	229	229	1	87.8	87.8	1	342	1063	Liver	Liver	9.506138	11.54150301	FALSE	FALSE
CHS.10953.14	CHS.10953.8	CLEC12B	247	276	0.8949	79.5	85.6	0.9287	15	1113	Testis	Testis	2.4645275	8.445272936	TRUE	TRUE
CHS.10953.5	CHS.10953.8	CLEC12B	232	276	0.8406	82.9	85.6	0.9685	1230	1113	Testis	Testis	5.942785559	8.445272936	TRUE	TRUE
CHS.10953.6	CHS.10953.8	CLEC12B	129	276	0.4674	88.7	85.6	1.0362	623	1113	Testis	Testis	5.357732645	8.445272936	TRUE	TRUE
CHS.10953.7	CHS.10953.8	CLEC12B	232	276	0.8406	82.9	85.6	0.9685	873	1113	Testis	Testis	3.977394323	8.445272936	FALSE	TRUE
CHS.10953.9	CHS.10953.8	CLEC12B	173	276	0.6268	87.8	85.6	1.0257	48	1113	Testis	Testis	5.109798333	8.445272936	TRUE	TRUE
CHS.10955.5	CHS.10955.1	CLEC9A	241	241	1	83	83	1	1127	24	Brain	Testis	3.524539443	1.382598042	TRUE	FALSE
CHS.10956.1	CHS.10956.7	CLEC1A	307	280	1.0964	78.3	82.7	0.9468	75	6910	Vagina	Lung	2.89781	19.5265472	TRUE	TRUE
CHS.10956.19	CHS.10956.7	CLEC1A	207	280	0.7393	74.5	82.7	0.9008	376	6910	Adrenal_Gland	Lung	1.885239667	19.5265472	FALSE	TRUE
CHS.10956.5	CHS.10956.7	CLEC1A	188	280	0.6714	77.9	82.7	0.942	2374	6910	Lung	Lung	1.444177143	19.5265472	TRUE	TRUE
CHS.10956.6	CHS.10956.7	CLEC1A	247	280	0.8821	83.5	82.7	1.0097	3302	6910	Lung	Lung	2.525208997	19.5265472	TRUE	TRUE
CHS.10956.8	CHS.10956.7	CLEC1A	192	280	0.6857	90	82.7	1.0883	183	6910	Spleen	Lung	2.53515	19.5265472	TRUE	TRUE
CHS.10956.9	CHS.10956.7	CLEC1A	192	280	0.6857	90	82.7	1.0883	183	6910	Spleen	Lung	2.53515	19.5265472	FALSE	TRUE
CHS.10959.10	CHS.10959.11	CLEC7A	189	247	0.7652	59.8	75.6	0.791	3763	4401	Blood	Blood	3.46788858	8.904457426	TRUE	TRUE
CHS.10959.12	CHS.10959.11	CLEC7A	192	247	0.7773	58.1	75.6	0.7685	3805	4401	Blood	Blood	9.110164241	8.904457426	FALSE	TRUE
CHS.10959.18	CHS.10959.11	CLEC7A	77	247	0.3117	66.6	75.6	0.881	6354	4401	Lung	Blood	1.596901503	8.904457426	TRUE	TRUE
CHS.10959.27	CHS.10959.11	CLEC7A	194	247	0.7854	80.5	75.6	1.0648	1875	4401	Blood	Blood	16.87851391	8.904457426	TRUE	TRUE
CHS.10959.6	CHS.10959.11	CLEC7A	139	247	0.5628	48.5	75.6	0.6415	1844	4401	Blood	Blood	11.81012782	8.904457426	FALSE	TRUE
CHS.10959.7	CHS.10959.11	CLEC7A	168	247	0.6802	84.1	75.6	1.1124	1886	4401	Cervix_Uteri	Blood	1.29216	8.904457426	TRUE	TRUE
CHS.10959.8	CHS.10959.11	CLEC7A	143	247	0.5789	64.1	75.6	0.8479	5042	4401	Spleen	Blood	4.562489256	8.904457426	TRUE	TRUE
CHS.10959.9	CHS.10959.11	CLEC7A	201	247	0.8138	83	75.6	1.0979	6133	4401	Blood	Blood	15.85180664	8.904457426	TRUE	TRUE
CHS.1096.1	CHS.1096.3	LCK	516	509	1.0138	70.6	80.8	0.8738	1998	3618	Spleen	Blood	6.37614469	46.65542149	TRUE	TRUE
CHS.1096.13	CHS.1096.3	LCK	567	509	1.1139	75.6	80.8	0.9356	775	3618	Spleen	Blood	29.10448556	46.65542149	TRUE	TRUE
CHS.1096.17	CHS.1096.3	LCK	539	509	1.0589	77.6	80.8	0.9604	2	3618	Blood	Blood	0.4530825	46.65542149	TRUE	TRUE
CHS.1096.2	CHS.1096.3	LCK	458	509	0.8998	78.1	80.8	0.9666	54	3618	Lung	Blood	3.77855	46.65542149	TRUE	TRUE
CHS.1096.8	CHS.1096.3	LCK	509	509	1	80.8	80.8	1	2044	3618	Bladder	Blood	0.780814	46.65542149	TRUE	TRUE
CHS.10961.2	CHS.10961.9	OLR1	220	273	0.8059	91.6	86.4	1.0602	372	2578	Colon	Lung	4.21856	28.20238046	FALSE	TRUE
CHS.10961.7	CHS.10961.9	OLR1	181	273	0.663	74.9	86.4	0.8669	1240	2578	Colon	Lung	6.024575	28.20238046	TRUE	TRUE
CHS.10961.8	CHS.10961.9	OLR1	189	273	0.6923	83	86.4	0.9606	1645	2578	Lung	Lung	7.329508655	28.20238046	TRUE	TRUE
CHS.10962.10	CHS.10962.5	TMEM52B	183	183	1	53.1	53.1	1	67	82	Brain	Kidney	2.162792954	49.20421529	TRUE	TRUE
CHS.10962.12	CHS.10962.5	TMEM52B	170	183	0.929	56.4	53.1	1.0621	8	82	Kidney	Kidney	1.775281	49.20421529	TRUE	TRUE
CHS.10962.2	CHS.10962.5	TMEM52B	183	183	1	53.1	53.1	1	67	82	Brain	Kidney	2.162792954	49.20421529	FALSE	TRUE
CHS.10962.6	CHS.10962.5	TMEM52B	163	183	0.8907	57.3	53.1	1.0791	55	82	Kidney	Kidney	14.35414542	49.20421529	TRUE	TRUE
CHS.10962.8	CHS.10962.5	TMEM52B	183	183	1	53.1	53.1	1	67	82	Brain	Kidney	2.162792954	49.20421529	FALSE	TRUE
CHS.10962.9	CHS.10962.5	TMEM52B	163	183	0.8907	57.3	53.1	1.0791	55	82	Kidney	Kidney	14.35414542	49.20421529	FALSE	TRUE
CHS.10964.1	CHS.10964.9	GABARAPL1	146	117	1.2479	70.9	94.4	0.7511	9786	9787	Ovary	Pituitary	32.04176321	293.4544846	TRUE	TRUE
CHS.10964.16	CHS.10964.9	GABARAPL1	103	117	0.8803	45.2	94.4	0.4788	2111	9787	Ovary	Pituitary	8.956158889	293.4544846	TRUE	TRUE
CHS.10964.20	CHS.10964.9	GABARAPL1	103	117	0.8803	45.2	94.4	0.4788	1638	9787	Breast	Pituitary	7.039045455	293.4544846	FALSE	TRUE
CHS.10965.1	CHS.10965.11	KLRD1	185	179	1.0335	83.2	85.7	0.9708	0	3678	-	Spleen	0	5.233852144	FALSE	TRUE
CHS.10965.10	CHS.10965.11	KLRD1	189	179	1.0559	75.6	85.7	0.8821	2	3678	Lung	Spleen	1.75909	5.233852144	TRUE	TRUE
CHS.10965.12	CHS.10965.11	KLRD1	148	179	0.8268	86.3	85.7	1.007	1588	3678	Spleen	Spleen	1.303226439	5.233852144	TRUE	TRUE
CHS.10965.16	CHS.10965.11	KLRD1	186	179	1.0391	82.5	85.7	0.9627	79	3678	Lung	Spleen	2.111375286	5.233852144	TRUE	TRUE
CHS.10965.19	CHS.10965.11	KLRD1	72	179	0.4022	86.6	85.7	1.0105	696	3678	Spleen	Spleen	0.334927725	5.233852144	TRUE	TRUE
CHS.10965.21	CHS.10965.11	KLRD1	106	179	0.5922	76.3	85.7	0.8903	314	3678	Blood	Spleen	2.249046986	5.233852144	TRUE	TRUE
CHS.10965.24	CHS.10965.11	KLRD1	220	179	1.2291	76.7	85.7	0.895	8	3678	Spleen	Spleen	1.7530194	5.233852144	TRUE	TRUE
CHS.10965.25	CHS.10965.11	KLRD1	158	179	0.8827	90.2	85.7	1.0525	28	3678	Blood	Spleen	0.917496318	5.233852144	TRUE	TRUE
CHS.10965.27	CHS.10965.11	KLRD1	105	179	0.5866	77.7	85.7	0.9067	8	3678	Nerve	Spleen	1.61747	5.233852144	TRUE	TRUE
CHS.10965.29	CHS.10965.11	KLRD1	185	179	1.0335	83.2	85.7	0.9708	508	3678	Spleen	Spleen	2.912468115	5.233852144	FALSE	TRUE
CHS.10965.5	CHS.10965.11	KLRD1	219	179	1.2235	77.4	85.7	0.9032	1	3678	Spleen	Spleen	2.99337	5.233852144	TRUE	TRUE
CHS.10965.6	CHS.10965.11	KLRD1	179	179	1	85.7	85.7	1	1612	3678	Spleen	Spleen	0.840435094	5.233852144	TRUE	TRUE
CHS.10965.9	CHS.10965.11	KLRD1	179	179	1	85.7	85.7	1	1612	3678	Spleen	Spleen	0.840435094	5.233852144	FALSE	TRUE
CHS.1097.2	CHS.1097.5	HDAC1	289	482	0.5996	77.2	85.4	0.904	5259	9770	Thyroid	Bone_Marrow	15.99802417	190.0509118	FALSE	FALSE
CHS.1097.4	CHS.1097.5	HDAC1	451	482	0.9357	83.1	85.4	0.9731	286	9770	Bone_Marrow	Bone_Marrow	9.749944938	190.0509118	FALSE	FALSE
CHS.10973.2	CHS.10973.1	KLRK1	89	216	0.412	86.1	77.4	1.1124	979	4421	Spleen	Spleen	16.80190391	17.18230846	FALSE	FALSE
CHS.10974.2	CHS.10974.1	KLRC3	257	240	1.0708	66.5	67.3	0.9881	1707	1796	Pituitary	Spleen	0.789836	3.202965432	FALSE	FALSE
CHS.10975.6	CHS.10975.1	KLRC2	172	231	0.7446	84.6	70.8	1.1949	2	2176	Spleen	Brain	2.21355	3.258561195	FALSE	FALSE
CHS.10976.1	CHS.10976.3	KLRC1	228	233	0.9785	70	73.5	0.9524	90	1526	Prostate	Spleen	0.510362	2.874554991	FALSE	FALSE
CHS.10976.2	CHS.10976.3	KLRC1	215	233	0.9227	75.7	73.5	1.0299	1227	1526	Spleen	Spleen	1.53591069	2.874554991	FALSE	FALSE
CHS.10976.4	CHS.10976.3	KLRC1	215	233	0.9227	75.7	73.5	1.0299	1227	1526	Spleen	Spleen	1.53591069	2.874554991	FALSE	FALSE
CHS.10976.5	CHS.10976.3	KLRC1	233	233	1	73.5	73.5	1	303	1526	Lung	Spleen	0.759109853	2.874554991	FALSE	FALSE
CHS.10982.1	CHS.10982.4	MAGOHB	102	148	0.6892	93.5	92.1	1.0152	7589	9713	Bone_Marrow	Bone_Marrow	0.06836852	8.463652843	FALSE	FALSE
CHS.10982.2	CHS.10982.4	MAGOHB	102	148	0.6892	93.5	92.1	1.0152	7589	9713	Bone_Marrow	Bone_Marrow	0.06836852	8.463652843	FALSE	FALSE
CHS.10982.3	CHS.10982.4	MAGOHB	82	148	0.5541	71	92.1	0.7709	7336	9713	Bone_Marrow	Bone_Marrow	0.131099212	8.463652843	FALSE	FALSE
CHS.10982.5	CHS.10982.4	MAGOHB	90	148	0.6081	86.1	92.1	0.9349	9143	9713	Cervix_Uteri	Bone_Marrow	2.054490091	8.463652843	FALSE	FALSE
CHS.10982.8	CHS.10982.4	MAGOHB	81	148	0.5473	60.9	92.1	0.6612	7472	9713	Bone_Marrow	Bone_Marrow	4.880568184	8.463652843	FALSE	FALSE
CHS.10984.3	CHS.10984.7	STYK1	422	422	1	84.2	84.2	1	1011	1399	Bladder	Prostate	5.760216667	8.943014859	FALSE	FALSE
CHS.10984.4	CHS.10984.7	STYK1	422	422	1	84.2	84.2	1	1011	1399	Bladder	Prostate	5.760216667	8.943014859	FALSE	FALSE
CHS.10984.6	CHS.10984.7	STYK1	422	422	1	84.2	84.2	1	1011	1399	Bladder	Prostate	5.760216667	8.943014859	FALSE	FALSE
CHS.10986.30	CHS.10986.6	YBX3	200	372	0.5376	63.8	54.7	1.1664	4138	9783	Muscle	Muscle	71.86829474	1296.42183	FALSE	FALSE
CHS.10986.5	CHS.10986.6	YBX3	303	372	0.8145	58.7	54.7	1.0731	9784	9783	Muscle	Muscle	2584.941806	1296.42183	FALSE	FALSE
CHS.10997.2	CHS.10997.3	PRR4	65	134	0.4851	59.3	61.6	0.9627	1869	3775	Salivary_Gland	Salivary_Gland	153.1734935	3928.435339	FALSE	FALSE
CHS.10999.5	CHS.10999.11	PRH1	200	187	1.0695	54.2	57.8	0.9377	63	713	Spleen	Testis	10.3674	46.4708875	FALSE	FALSE
CHS.10999.6	CHS.10999.11	PRH1	187	187	1	57.8	57.8	1	713	713	Testis	Testis	46.4708875	46.4708875	FALSE	FALSE
CHS.11003.3	CHS.11003.1	PRH2	166	166	1	55	55	1	238	238	Esophagus	Esophagus	57.81354103	57.81354103	FALSE	FALSE
CHS.11012.1	CHS.11012.2	PRB3	309	351	0.8803	55.4	55.1	1.0054	0	154	-	Lung	0	4.24414	FALSE	FALSE
CHS.11014.1	CHS.11014.2	PRB4	178	247	0.7206	62.8	56.1	1.1194	42	135	Blood	Blood	2.8818	9.08676	FALSE	FALSE
CHS.11029.2	CHS.11029.8	ETV6	451	452	0.9978	57.3	55.7	1.0287	1644	9220	Bladder	Blood_Vessel	3.54593	21.84684171	TRUE	TRUE
CHS.11035.1	CHS.11035.13	BCL2L14	327	327	1	60.2	60.2	1	600	971	Brain	Colon	1.956217867	10.54919168	FALSE	TRUE
CHS.11035.12	CHS.11035.13	BCL2L14	327	327	1	60.2	60.2	1	153	971	Colon	Colon	1.61302415	10.54919168	FALSE	TRUE
CHS.11035.14	CHS.11035.13	BCL2L14	252	327	0.7706	55.4	60.2	0.9203	373	971	Spleen	Colon	1.37241	10.54919168	TRUE	TRUE
CHS.11035.15	CHS.11035.13	BCL2L14	327	327	1	60.2	60.2	1	600	971	Brain	Colon	1.956217867	10.54919168	TRUE	TRUE
CHS.11035.20	CHS.11035.13	BCL2L14	327	327	1	60.2	60.2	1	600	971	Brain	Colon	1.956217867	10.54919168	FALSE	TRUE
CHS.11035.3	CHS.11035.13	BCL2L14	94	327	0.2875	83.3	60.2	1.3837	181	971	Testis	Colon	4.720516717	10.54919168	TRUE	TRUE
CHS.11037.9	CHS.11037.4	LRP6	1613	1613	1	79.3	79.3	1	1420	7682	Cervix_Uteri	Uterus	2.42959	16.61611968	FALSE	TRUE
CHS.11040.3	CHS.11040.5	MANSC1	397	431	0.9211	49.2	52.8	0.9318	7398	9456	Salivary_Gland	Salivary_Gland	7.376481912	23.84570114	TRUE	TRUE
CHS.11043.3	CHS.11043.2	BORCS5	177	196	0.9031	83.2	79.4	1.0479	9025	9691	Blood_Vessel	Testis	1.362456931	3.915226222	TRUE	TRUE
CHS.11043.6	CHS.11043.2	BORCS5	148	196	0.7551	83.1	79.4	1.0466	5624	9691	Brain	Testis	0.363928648	3.915226222	TRUE	TRUE
CHS.11043.8	CHS.11043.2	BORCS5	143	196	0.7296	71.2	79.4	0.8967	13	9691	Skin	Testis	5.98418	3.915226222	TRUE	TRUE
CHS.11044.13	CHS.11044.6	DUSP16	143	665	0.215	86.1	58.2	1.4794	6314	9464	Adrenal_Gland	Adrenal_Gland	3.513811007	25.81349584	TRUE	TRUE
CHS.11052.10	CHS.11052.12	GPR19	415	415	1	72.6	72.6	1	2087	2087	Pituitary	Pituitary	12.34151716	12.34151716	TRUE	TRUE
CHS.11052.2	CHS.11052.12	GPR19	415	415	1	72.6	72.6	1	225	2087	Pituitary	Pituitary	2.988228222	12.34151716	TRUE	TRUE
CHS.1106.1	CHS.1106.3	BSDC1	335	430	0.7791	60.2	55.6	1.0827	5357	9779	Testis	Adrenal_Gland	0.341139764	42.37758988	TRUE	TRUE
CHS.1106.2	CHS.1106.3	BSDC1	374	430	0.8698	59.6	55.6	1.0719	4728	9779	Testis	Adrenal_Gland	1.571274674	42.37758988	TRUE	TRUE
CHS.1106.4	CHS.1106.3	BSDC1	428	430	0.9953	55.1	55.6	0.991	7814	9779	Muscle	Adrenal_Gland	7.014705295	42.37758988	FALSE	TRUE
CHS.1106.5	CHS.1106.3	BSDC1	447	430	1.0395	55.6	55.6	1	9692	9779	Bone_Marrow	Adrenal_Gland	12.90290911	42.37758988	TRUE	TRUE
CHS.1106.6	CHS.1106.3	BSDC1	474	430	1.1023	54.1	55.6	0.973	9691	9779	Ovary	Adrenal_Gland	13.57647054	42.37758988	TRUE	TRUE
CHS.11060.13	CHS.11060.7	DDX47	255	455	0.5604	89	85.2	1.0446	1224	9768	Thyroid	Bladder	40.95432198	62.32123636	TRUE	TRUE
CHS.11060.8	CHS.11060.7	DDX47	406	455	0.8923	80.6	85.2	0.946	7671	9768	Bladder	Bladder	3.306978889	62.32123636	TRUE	TRUE
CHS.11061.2	CHS.11061.13	APOLD1	279	248	1.125	64.7	66.9	0.9671	1895	4671	Adipose_Tissue	Adipose_Tissue	76.51549576	112.8774661	TRUE	TRUE
CHS.11068.18	CHS.11068.1	GPRC5A	273	357	0.7647	84.2	76	1.1079	15	6717	Lung	Lung	17.8209	164.8566995	TRUE	TRUE
CHS.11068.23	CHS.11068.1	GPRC5A	339	357	0.9496	77	76	1.0132	1652	6717	Lung	Lung	26.2709266	164.8566995	FALSE	TRUE
CHS.11068.7	CHS.11068.1	GPRC5A	343	357	0.9608	76.1	76	1.0013	663	6717	Cervix_Uteri	Lung	22.32513333	164.8566995	TRUE	TRUE
CHS.11072.10	CHS.11072.1	GPRC5D	300	345	0.8696	79.1	73.8	1.0718	702	264	Lung	Skin	2.880903771	18.47353638	TRUE	TRUE
CHS.11072.16	CHS.11072.1	GPRC5D	333	345	0.9652	75.4	73.8	1.0217	60	264	Adipose_Tissue	Skin	1.75517	18.47353638	TRUE	TRUE
CHS.11073.10	CHS.11073.2	HEBP1	207	189	1.0952	64.7	86.4	0.7488	1201	9766	Thyroid	Thyroid	4.164583784	137.8342322	TRUE	TRUE
CHS.11073.9	CHS.11073.2	HEBP1	131	189	0.6931	85.2	86.4	0.9861	2318	9766	Thyroid	Thyroid	3.162409587	137.8342322	FALSE	TRUE
CHS.11074.17	CHS.11074.7	GSG1	371	362	1.0249	63.3	67.1	0.9434	0	218	-	Testis	0	98.48529363	FALSE	FALSE
CHS.11074.19	CHS.11074.7	GSG1	386	362	1.0663	66.2	67.1	0.9866	43	218	Testis	Testis	7.069717744	98.48529363	FALSE	FALSE
CHS.11074.2	CHS.11074.7	GSG1	275	362	0.7597	60.6	67.1	0.9031	254	218	Kidney	Testis	0.210434	98.48529363	FALSE	FALSE
CHS.11074.21	CHS.11074.7	GSG1	345	362	0.953	41.9	67.1	0.6244	1	218	Testis	Testis	1.17922	98.48529363	FALSE	FALSE
CHS.11074.28	CHS.11074.7	GSG1	349	362	0.9641	68.3	67.1	1.0179	31	218	Skin	Testis	0.921835	98.48529363	FALSE	FALSE
CHS.11074.29	CHS.11074.7	GSG1	270	362	0.7459	53.8	67.1	0.8018	1	218	Skin	Testis	0.70436	98.48529363	FALSE	FALSE
CHS.11074.3	CHS.11074.7	GSG1	326	362	0.9006	70.6	67.1	1.0522	422	218	Nerve	Testis	1.09067	98.48529363	FALSE	FALSE
CHS.11074.34	CHS.11074.7	GSG1	402	362	1.1105	63	67.1	0.9389	0	218	-	Testis	0	98.48529363	FALSE	FALSE
CHS.11074.35	CHS.11074.7	GSG1	354	362	0.9779	38.7	67.1	0.5768	0	218	-	Testis	0	98.48529363	FALSE	FALSE
CHS.11074.4	CHS.11074.7	GSG1	285	362	0.7873	50.1	67.1	0.7466	512	218	Pancreas	Testis	1.016571445	98.48529363	FALSE	FALSE
CHS.11074.5	CHS.11074.7	GSG1	298	362	0.8232	57.9	67.1	0.8629	249	218	Skin	Testis	0.075335913	98.48529363	FALSE	FALSE
CHS.11074.6	CHS.11074.7	GSG1	339	362	0.9365	69.8	67.1	1.0402	321	218	Testis	Testis	43.51678377	98.48529363	FALSE	FALSE
CHS.11074.8	CHS.11074.7	GSG1	321	362	0.8867	46.4	67.1	0.6915	371	218	Testis	Testis	201.7271172	98.48529363	FALSE	FALSE
CHS.11074.9	CHS.11074.7	GSG1	298	362	0.8232	49.7	67.1	0.7407	146	218	Testis	Testis	29.08517353	98.48529363	FALSE	FALSE
CHS.11085.5	CHS.11085.3	GRIN2B	1484	1484	1	60.5	60.5	1	286	148	Brain	Brain	3.241447993	5.312561622	TRUE	TRUE
CHS.11093.36	CHS.11093.3	ATF7IP	711	1270	0.5598	47.1	48.3	0.9752	0	9413	-	Testis	0	14.1286401	FALSE	FALSE
CHS.11093.4	CHS.11093.3	ATF7IP	703	1270	0.5535	46.4	48.3	0.9607	45	9413	Nerve	Testis	1.90702075	14.1286401	FALSE	FALSE
CHS.11098.2	CHS.11098.1	H2AJ	129	129	1	89.4	89.4	1	6225	0	Prostate	-	63.19746422	0	FALSE	TRUE
CHS.11099.12	CHS.11099.2	GUCY2C	455	1073	0.424	81.3	79.6	1.0214	2	298	Uterus	Small_Intestine	1.55533	39.29025776	TRUE	TRUE
CHS.11099.13	CHS.11099.2	GUCY2C	805	1073	0.7502	81.1	79.6	1.0188	2	298	Skin	Small_Intestine	1.0682605	39.29025776	FALSE	TRUE
CHS.11099.3	CHS.11099.2	GUCY2C	991	1073	0.9236	81.4	79.6	1.0226	190	298	Small_Intestine	Small_Intestine	6.255629682	39.29025776	TRUE	TRUE
CHS.111.25	CHS.111.29	MIB2	955	955	1	82.1	82.1	1	9512	9517	Pituitary	Testis	10.39113418	23.20827725	FALSE	FALSE
CHS.111.26	CHS.111.29	MIB2	951	955	0.9958	82.5	82.1	1.0049	9000	9517	Testis	Testis	6.800215279	23.20827725	FALSE	FALSE
CHS.111.27	CHS.111.29	MIB2	890	955	0.9319	81.8	82.1	0.9963	7808	9517	Testis	Testis	2.398709473	23.20827725	FALSE	FALSE
CHS.111.28	CHS.111.29	MIB2	854	955	0.8942	83	82.1	1.011	9450	9517	Testis	Testis	3.911908142	23.20827725	FALSE	FALSE
CHS.111.39	CHS.111.29	MIB2	711	955	0.7445	79.8	82.1	0.972	37	9517	Ovary	Testis	18.0599	23.20827725	FALSE	FALSE
CHS.111.42	CHS.111.29	MIB2	753	955	0.7885	83.3	82.1	1.0146	3723	9517	Pituitary	Testis	2.04415	23.20827725	FALSE	FALSE
CHS.111.53	CHS.111.29	MIB2	955	955	1	82.1	82.1	1	3279	9517	Ovary	Testis	30.26526667	23.20827725	FALSE	FALSE
CHS.111.55	CHS.111.29	MIB2	818	955	0.8565	82.7	82.1	1.0073	82	9517	Pituitary	Testis	3.71317	23.20827725	FALSE	FALSE
CHS.111.68	CHS.111.29	MIB2	919	955	0.9623	82.6	82.1	1.0061	97	9517	Pituitary	Testis	4.897373333	23.20827725	TRUE	FALSE
CHS.11106.3	CHS.11106.2	ART4	290	314	0.9236	82.6	80.1	1.0312	5272	4001	Liver	Liver	3.369367419	5.984420841	TRUE	TRUE
CHS.11107.3	CHS.11107.2	MGP	128	103	1.2427	75.1	81.4	0.9226	3651	9787	Blood_Vessel	Blood_Vessel	76.89391992	4980.634714	TRUE	TRUE
CHS.11109.12	CHS.11109.3	ERP27	219	273	0.8022	89.8	85.2	1.054	25	1777	Fallopian_Tube	Pancreas	33.84245	157.4087817	TRUE	TRUE
CHS.11109.2	CHS.11109.3	ERP27	172	273	0.63	81.6	85.2	0.9577	2785	1777	Thyroid	Pancreas	14.55682001	157.4087817	TRUE	TRUE
CHS.11110.1	CHS.11110.5	ARHGDIB	60	201	0.2985	92.1	85.5	1.0772	7637	9780	Blood_Vessel	Blood	4.649394906	978.1478093	TRUE	FALSE
CHS.11110.2	CHS.11110.5	ARHGDIB	201	201	1	85.5	85.5	1	4407	9780	Blood	Blood	8.178912787	978.1478093	FALSE	FALSE
CHS.11110.3	CHS.11110.5	ARHGDIB	201	201	1	85.5	85.5	1	4407	9780	Blood	Blood	8.178912787	978.1478093	FALSE	FALSE
CHS.11110.4	CHS.11110.5	ARHGDIB	201	201	1	85.5	85.5	1	4407	9780	Blood	Blood	8.178912787	978.1478093	FALSE	FALSE
CHS.11110.6	CHS.11110.5	ARHGDIB	201	201	1	85.5	85.5	1	4407	9780	Blood	Blood	8.178912787	978.1478093	FALSE	FALSE
CHS.11115.10	CHS.11115.5	RERG	126	199	0.6332	87.4	88.3	0.9898	2536	8509	Uterus	Uterus	4.965568857	141.0804594	TRUE	TRUE
CHS.11115.3	CHS.11115.5	RERG	144	199	0.7236	87.7	88.3	0.9932	2073	8509	Uterus	Uterus	16.51265914	141.0804594	TRUE	TRUE
CHS.11115.4	CHS.11115.5	RERG	180	199	0.9045	86.6	88.3	0.9807	6898	8509	Uterus	Uterus	17.78498771	141.0804594	TRUE	TRUE
CHS.11119.10	CHS.11119.1	PTPRO	377	1216	0.31	87	77.1	1.1284	2710	533	Lung	Brain	2.413526218	9.019478339	TRUE	TRUE
CHS.11119.25	CHS.11119.1	PTPRO	413	1216	0.3396	70.8	77.1	0.9183	44	533	Uterus	Brain	1.82837	9.019478339	TRUE	TRUE
CHS.11119.4	CHS.11119.1	PTPRO	1216	1216	1	77.1	77.1	1	4	533	Brain	Brain	0.901349333	9.019478339	FALSE	TRUE
CHS.11119.7	CHS.11119.1	PTPRO	405	1216	0.3331	84.4	77.1	1.0947	2016	533	Colon	Brain	3.278640036	9.019478339	TRUE	TRUE
CHS.11119.8	CHS.11119.1	PTPRO	405	1216	0.3331	84.4	77.1	1.0947	2016	533	Colon	Brain	3.278640036	9.019478339	TRUE	TRUE
CHS.11119.9	CHS.11119.1	PTPRO	377	1216	0.31	87	77.1	1.1284	2710	533	Lung	Brain	2.413526218	9.019478339	TRUE	TRUE
CHS.1112.3	CHS.1112.2	ZBTB8A	340	441	0.771	65.6	61.6	1.0649	6447	7332	Uterus	Uterus	1.439918892	4.704162916	FALSE	FALSE
CHS.1112.8	CHS.1112.2	ZBTB8A	189	441	0.4286	63.6	61.6	1.0325	52	7332	Muscle	Uterus	1.65256	4.704162916	FALSE	FALSE
CHS.11122.16	CHS.11122.4	EPS8	842	822	1.0243	67.3	68.5	0.9825	5442	9142	Blood_Vessel	Blood_Vessel	40.04410626	93.06224947	TRUE	TRUE
CHS.11127.15	CHS.11127.1	DERA	236	318	0.7421	88.1	95.3	0.9244	45	9740	Small_Intestine	Small_Intestine	8.53195	34.47198173	TRUE	TRUE
CHS.11127.16	CHS.11127.1	DERA	282	318	0.8868	88.3	95.3	0.9265	1786	9740	Uterus	Small_Intestine	9.109829592	34.47198173	TRUE	TRUE
CHS.11127.2	CHS.11127.1	DERA	275	318	0.8648	92	95.3	0.9654	8262	9740	Muscle	Small_Intestine	1.721191073	34.47198173	TRUE	TRUE
CHS.11132.14	CHS.11132.15	MGST1	106	155	0.6839	66.8	66	1.0121	4424	9777	Adrenal_Gland	Adrenal_Gland	93.78670506	1200.731106	TRUE	TRUE
CHS.11132.17	CHS.11132.15	MGST1	155	155	1	66	66	1	7914	9777	Adipose_Tissue	Adrenal_Gland	11.72376027	1200.731106	TRUE	TRUE
CHS.11132.18	CHS.11132.15	MGST1	87	155	0.5613	63.5	66	0.9621	8297	9777	Adrenal_Gland	Adrenal_Gland	0.998241516	1200.731106	TRUE	TRUE
CHS.11132.2	CHS.11132.15	MGST1	155	155	1	66	66	1	7914	9777	Adipose_Tissue	Adrenal_Gland	11.72376027	1200.731106	FALSE	TRUE
CHS.11132.24	CHS.11132.15	MGST1	155	155	1	66	66	1	7914	9777	Adipose_Tissue	Adrenal_Gland	11.72376027	1200.731106	TRUE	TRUE
CHS.11132.25	CHS.11132.15	MGST1	46	155	0.2968	79.6	66	1.2061	7751	9777	Adrenal_Gland	Adrenal_Gland	7.309676031	1200.731106	FALSE	TRUE
CHS.11132.27	CHS.11132.15	MGST1	155	155	1	66	66	1	7914	9777	Adipose_Tissue	Adrenal_Gland	11.72376027	1200.731106	FALSE	TRUE
CHS.11134.10	CHS.11134.8	LMO3	167	145	1.1517	60.9	85.3	0.714	718	7555	Prostate	Thyroid	4.134046	40.01948799	TRUE	TRUE
CHS.11134.12	CHS.11134.8	LMO3	145	145	1	85.3	85.3	1	4460	7555	Bladder	Thyroid	16.072022	40.01948799	TRUE	TRUE
CHS.11134.14	CHS.11134.8	LMO3	145	145	1	85.3	85.3	1	4460	7555	Bladder	Thyroid	16.072022	40.01948799	TRUE	TRUE
CHS.11134.15	CHS.11134.8	LMO3	70	145	0.4828	82.8	85.3	0.9707	25	7555	Brain	Thyroid	2.2809985	40.01948799	FALSE	TRUE
CHS.11134.23	CHS.11134.8	LMO3	145	145	1	85.3	85.3	1	4460	7555	Bladder	Thyroid	16.072022	40.01948799	TRUE	TRUE
CHS.11134.36	CHS.11134.8	LMO3	145	145	1	85.3	85.3	1	4460	7555	Bladder	Thyroid	16.072022	40.01948799	TRUE	TRUE
CHS.11134.47	CHS.11134.8	LMO3	83	145	0.5724	75.8	85.3	0.8886	756	7555	Thyroid	Thyroid	3.335250393	40.01948799	FALSE	TRUE
CHS.11134.48	CHS.11134.8	LMO3	57	145	0.3931	79.8	85.3	0.9355	3708	7555	Bladder	Thyroid	10.66399571	40.01948799	TRUE	TRUE
CHS.11134.51	CHS.11134.8	LMO3	145	145	1	85.3	85.3	1	1154	7555	Bladder	Thyroid	7.505045	40.01948799	FALSE	TRUE
CHS.11134.6	CHS.11134.8	LMO3	156	145	1.0759	86.6	85.3	1.0152	5156	7555	Brain	Thyroid	6.908325087	40.01948799	TRUE	TRUE
CHS.11134.7	CHS.11134.8	LMO3	163	145	1.1241	85.5	85.3	1.0023	968	7555	Brain	Thyroid	1.580287595	40.01948799	TRUE	TRUE
CHS.11134.9	CHS.11134.8	LMO3	145	145	1	85.3	85.3	1	4460	7555	Bladder	Thyroid	16.072022	40.01948799	TRUE	TRUE
CHS.11145.1	CHS.11145.2	RERGL	62	204	0.3039	87.3	84.3	1.0356	3659	7919	Blood_Vessel	Blood_Vessel	4.458537331	80.95763076	FALSE	FALSE
CHS.11145.3	CHS.11145.2	RERGL	205	204	1.0049	79.3	84.3	0.9407	4851	7919	Blood_Vessel	Blood_Vessel	32.92181338	80.95763076	FALSE	FALSE
CHS.11147.16	CHS.11147.17	PLCZ1	649	608	1.0674	90	91.9	0.9793	196	192	Testis	Testis	4.873209426	24.75479925	FALSE	FALSE
CHS.11147.18	CHS.11147.17	PLCZ1	504	608	0.8289	91.9	91.9	1	190	192	Testis	Testis	23.91652275	24.75479925	FALSE	FALSE
CHS.11147.21	CHS.11147.17	PLCZ1	461	608	0.7582	88.5	91.9	0.963	2	192	Testis	Testis	2.231534	24.75479925	FALSE	FALSE
CHS.11147.22	CHS.11147.17	PLCZ1	415	608	0.6826	84.9	91.9	0.9238	188	192	Testis	Testis	2.991364369	24.75479925	FALSE	FALSE
CHS.1115.10	CHS.1115.24	ZBTB8OS	110	167	0.6587	91.2	87	1.0483	9055	9764	Pituitary	Bone_Marrow	6.093553307	17.97961863	FALSE	TRUE
CHS.1115.11	CHS.1115.24	ZBTB8OS	110	167	0.6587	91.2	87	1.0483	9055	9764	Pituitary	Bone_Marrow	6.093553307	17.97961863	TRUE	TRUE
CHS.1115.12	CHS.1115.24	ZBTB8OS	127	167	0.7605	93.9	87	1.0793	249	9764	Thyroid	Bone_Marrow	1.47854175	17.97961863	TRUE	TRUE
CHS.1115.15	CHS.1115.24	ZBTB8OS	79	167	0.4731	56	87	0.6437	1920	9764	Bone_Marrow	Bone_Marrow	1.885878031	17.97961863	FALSE	TRUE
CHS.1115.17	CHS.1115.24	ZBTB8OS	100	167	0.5988	58.4	87	0.6713	2473	9764	Blood	Bone_Marrow	1.806705	17.97961863	TRUE	TRUE
CHS.1115.19	CHS.1115.24	ZBTB8OS	110	167	0.6587	91.2	87	1.0483	9055	9764	Pituitary	Bone_Marrow	6.093553307	17.97961863	FALSE	TRUE
CHS.1115.21	CHS.1115.24	ZBTB8OS	51	167	0.3054	63.6	87	0.731	3425	9764	Pituitary	Bone_Marrow	2.099615514	17.97961863	TRUE	TRUE
CHS.1115.23	CHS.1115.24	ZBTB8OS	148	167	0.8862	70	87	0.8046	9733	9764	Blood	Bone_Marrow	1.490570065	17.97961863	TRUE	TRUE
CHS.1115.25	CHS.1115.24	ZBTB8OS	110	167	0.6587	91.2	87	1.0483	9055	9764	Pituitary	Bone_Marrow	6.093553307	17.97961863	FALSE	TRUE
CHS.1115.26	CHS.1115.24	ZBTB8OS	141	167	0.8443	66	87	0.7586	182	9764	Nerve	Bone_Marrow	1.2820285	17.97961863	TRUE	TRUE
CHS.1115.27	CHS.1115.24	ZBTB8OS	172	167	1.0299	85.3	87	0.9805	7125	9764	Testis	Bone_Marrow	0.38368978	17.97961863	TRUE	TRUE
CHS.1115.28	CHS.1115.24	ZBTB8OS	110	167	0.6587	91.2	87	1.0483	9055	9764	Pituitary	Bone_Marrow	6.093553307	17.97961863	TRUE	TRUE
CHS.1115.29	CHS.1115.24	ZBTB8OS	110	167	0.6587	91.2	87	1.0483	9055	9764	Pituitary	Bone_Marrow	6.093553307	17.97961863	FALSE	TRUE
CHS.1115.30	CHS.1115.24	ZBTB8OS	110	167	0.6587	91.2	87	1.0483	9055	9764	Pituitary	Bone_Marrow	6.093553307	17.97961863	FALSE	TRUE
CHS.1115.31	CHS.1115.24	ZBTB8OS	93	167	0.5569	40	87	0.4598	3672	9764	Cervix_Uteri	Bone_Marrow	2.200485	17.97961863	TRUE	TRUE
CHS.1115.37	CHS.1115.24	ZBTB8OS	135	167	0.8084	77.9	87	0.8954	28	9764	Nerve	Bone_Marrow	2.44671	17.97961863	TRUE	TRUE
CHS.1115.45	CHS.1115.24	ZBTB8OS	67	167	0.4012	45.8	87	0.5264	15	9764	Thyroid	Bone_Marrow	0.820835	17.97961863	TRUE	TRUE
CHS.1115.47	CHS.1115.24	ZBTB8OS	59	167	0.3533	71.5	87	0.8218	38	9764	Salivary_Gland	Bone_Marrow	1.47637	17.97961863	TRUE	TRUE
CHS.1115.5	CHS.1115.24	ZBTB8OS	131	167	0.7844	89.6	87	1.0299	9451	9764	Prostate	Bone_Marrow	2.124226793	17.97961863	FALSE	TRUE
CHS.1115.51	CHS.1115.24	ZBTB8OS	155	167	0.9281	81.8	87	0.9402	1	9764	Adrenal_Gland	Bone_Marrow	0.551404	17.97961863	TRUE	TRUE
CHS.1115.52	CHS.1115.24	ZBTB8OS	149	167	0.8922	79.9	87	0.9184	6	9764	Skin	Bone_Marrow	1.05886	17.97961863	TRUE	TRUE
CHS.1115.53	CHS.1115.24	ZBTB8OS	191	167	1.1437	80.3	87	0.923	6	9764	Blood	Bone_Marrow	1.56114	17.97961863	TRUE	TRUE
CHS.1115.54	CHS.1115.24	ZBTB8OS	122	167	0.7305	78	87	0.8966	4	9764	Bone_Marrow	Bone_Marrow	0.859648333	17.97961863	TRUE	TRUE
CHS.1115.55	CHS.1115.24	ZBTB8OS	110	167	0.6587	91.2	87	1.0483	9055	9764	Pituitary	Bone_Marrow	6.093553307	17.97961863	TRUE	TRUE
CHS.1115.6	CHS.1115.24	ZBTB8OS	110	167	0.6587	91.2	87	1.0483	9055	9764	Pituitary	Bone_Marrow	6.093553307	17.97961863	TRUE	TRUE
CHS.1115.61	CHS.1115.24	ZBTB8OS	112	167	0.6707	85.3	87	0.9805	0	9764	-	Bone_Marrow	0	17.97961863	FALSE	TRUE
CHS.1115.62	CHS.1115.24	ZBTB8OS	76	167	0.4551	71	87	0.8161	0	9764	-	Bone_Marrow	0	17.97961863	FALSE	TRUE
CHS.1115.64	CHS.1115.24	ZBTB8OS	92	167	0.5509	47	87	0.5402	0	9764	-	Bone_Marrow	0	17.97961863	TRUE	TRUE
CHS.1115.7	CHS.1115.24	ZBTB8OS	110	167	0.6587	91.2	87	1.0483	9055	9764	Pituitary	Bone_Marrow	6.093553307	17.97961863	FALSE	TRUE
CHS.1115.8	CHS.1115.24	ZBTB8OS	131	167	0.7844	89.6	87	1.0299	9451	9764	Prostate	Bone_Marrow	2.124226793	17.97961863	TRUE	TRUE
CHS.11155.4	CHS.11155.5	AEBP2	479	503	0.9523	52.5	52.8	0.9943	91	9665	Blood_Vessel	Blood_Vessel	1.138031286	13.83245616	TRUE	TRUE
CHS.11155.6	CHS.11155.5	AEBP2	517	503	1.0278	52.5	52.8	0.9943	9559	9665	Blood_Vessel	Blood_Vessel	9.216304206	13.83245616	TRUE	TRUE
CHS.11155.8	CHS.11155.5	AEBP2	301	503	0.5984	55.8	52.8	1.0568	7218	9665	Blood_Vessel	Blood_Vessel	0.760240491	13.83245616	TRUE	TRUE
CHS.1116.11	CHS.1116.1	RBBP4	390	425	0.9176	91.6	91.2	1.0044	6516	9794	Testis	Bone_Marrow	0.351849861	79.9997902	FALSE	FALSE
CHS.1116.17	CHS.1116.1	RBBP4	410	425	0.9647	92.2	91.2	1.011	40	9794	Bone_Marrow	Bone_Marrow	8.1263025	79.9997902	FALSE	FALSE
CHS.1116.2	CHS.1116.1	RBBP4	424	425	0.9976	91.2	91.2	1	7961	9794	Bone_Marrow	Bone_Marrow	4.446690693	79.9997902	FALSE	FALSE
CHS.1117.3	CHS.1117.4	SYNC	476	482	0.9876	72.5	71.6	1.0126	6452	6905	Esophagus	Muscle	5.230341317	38.24615014	TRUE	TRUE
CHS.11172.17	CHS.11172.3	PDE3A	794	1141	0.6959	62.3	60.6	1.0281	3	5107	Heart	Blood_Vessel	1.15819	41.66279151	FALSE	FALSE
CHS.11172.18	CHS.11172.3	PDE3A	754	1141	0.6608	63.7	60.6	1.0512	0	5107	-	Blood_Vessel	0	41.66279151	FALSE	FALSE
CHS.11172.8	CHS.11172.3	PDE3A	819	1141	0.7178	64.1	60.6	1.0578	1654	5107	Cervix_Uteri	Blood_Vessel	0.486079	41.66279151	FALSE	FALSE
CHS.11173.12	CHS.11173.14	SLCO1C1	730	712	1.0253	72.8	78.1	0.9321	1323	1387	Pituitary	Pituitary	24.27341382	27.01382794	TRUE	TRUE
CHS.11173.13	CHS.11173.14	SLCO1C1	663	712	0.9312	75.4	78.1	0.9654	600	1387	Pituitary	Pituitary	5.038945783	27.01382794	TRUE	TRUE
CHS.11173.15	CHS.11173.14	SLCO1C1	612	712	0.8596	73.9	78.1	0.9462	924	1387	Pituitary	Pituitary	4.000832	27.01382794	TRUE	TRUE
CHS.11173.18	CHS.11173.14	SLCO1C1	712	712	1	78.1	78.1	1	476	1387	Pituitary	Pituitary	10.792826	27.01382794	TRUE	TRUE
CHS.11173.19	CHS.11173.14	SLCO1C1	729	712	1.0239	72.6	78.1	0.9296	7	1387	Brain	Pituitary	0.932641333	27.01382794	TRUE	TRUE
CHS.11173.20	CHS.11173.14	SLCO1C1	711	712	0.9986	77.5	78.1	0.9923	21	1387	Thyroid	Pituitary	2.08947	27.01382794	TRUE	TRUE
CHS.11173.22	CHS.11173.14	SLCO1C1	590	712	0.8287	75.5	78.1	0.9667	14	1387	Brain	Pituitary	1.053349231	27.01382794	TRUE	TRUE
CHS.11173.23	CHS.11173.14	SLCO1C1	589	712	0.8272	76.4	78.1	0.9782	14	1387	Brain	Pituitary	1.025570143	27.01382794	TRUE	TRUE
CHS.11173.32	CHS.11173.14	SLCO1C1	285	712	0.4003	67.7	78.1	0.8668	579	1387	Pituitary	Pituitary	7.570528917	27.01382794	FALSE	TRUE
CHS.11174.12	CHS.11174.2	SLCO1B3	674	702	0.9601	80.4	79.1	1.0164	18	65	Cervix_Uteri	Liver	24.6967	6.019623233	FALSE	FALSE
CHS.11174.13	CHS.11174.2	SLCO1B3	533	702	0.7593	80.7	79.1	1.0202	35	65	Testis	Liver	2.609892419	6.019623233	FALSE	FALSE
CHS.11174.3	CHS.11174.2	SLCO1B3	702	702	1	79.1	79.1	1	125	65	Liver	Liver	32.87244908	6.019623233	TRUE	FALSE
CHS.11177.1	CHS.11177.3	SLCO1A2	670	670	1	79.3	79.3	1	303	387	Brain	Brain	4.647355366	5.849282978	TRUE	FALSE
CHS.11177.10	CHS.11177.3	SLCO1A2	650	670	0.9701	80.3	79.3	1.0126	1254	387	Brain	Brain	25.37637126	5.849282978	FALSE	FALSE
CHS.11177.11	CHS.11177.3	SLCO1A2	668	670	0.997	79.7	79.3	1.005	517	387	Brain	Brain	7.099235261	5.849282978	FALSE	FALSE
CHS.11177.12	CHS.11177.3	SLCO1A2	578	670	0.8627	83.5	79.3	1.053	60	387	Brain	Brain	3.100620667	5.849282978	FALSE	FALSE
CHS.11177.18	CHS.11177.3	SLCO1A2	514	670	0.7672	82.4	79.3	1.0391	10	387	Brain	Brain	1.2598957	5.849282978	FALSE	FALSE
CHS.11177.19	CHS.11177.3	SLCO1A2	514	670	0.7672	82.4	79.3	1.0391	10	387	Brain	Brain	1.2598957	5.849282978	FALSE	FALSE
CHS.11177.2	CHS.11177.3	SLCO1A2	670	670	1	79.3	79.3	1	303	387	Brain	Brain	4.647355366	5.849282978	FALSE	FALSE
CHS.11177.20	CHS.11177.3	SLCO1A2	650	670	0.9701	80.3	79.3	1.0126	1254	387	Brain	Brain	25.37637126	5.849282978	FALSE	FALSE
CHS.11177.21	CHS.11177.3	SLCO1A2	514	670	0.7672	82.4	79.3	1.0391	10	387	Brain	Brain	1.2598957	5.849282978	FALSE	FALSE
CHS.11177.22	CHS.11177.3	SLCO1A2	668	670	0.997	79.7	79.3	1.005	517	387	Brain	Brain	7.099235261	5.849282978	FALSE	FALSE
CHS.11177.23	CHS.11177.3	SLCO1A2	597	670	0.891	82.1	79.3	1.0353	2	387	Brain	Brain	0.5574595	5.849282978	FALSE	FALSE
CHS.11177.24	CHS.11177.3	SLCO1A2	514	670	0.7672	82.4	79.3	1.0391	10	387	Brain	Brain	1.2598957	5.849282978	FALSE	FALSE
CHS.11177.25	CHS.11177.3	SLCO1A2	514	670	0.7672	82.4	79.3	1.0391	10	387	Brain	Brain	1.2598957	5.849282978	FALSE	FALSE
CHS.11177.26	CHS.11177.3	SLCO1A2	514	670	0.7672	82.4	79.3	1.0391	10	387	Brain	Brain	1.2598957	5.849282978	FALSE	FALSE
CHS.11177.27	CHS.11177.3	SLCO1A2	551	670	0.8224	78.6	79.3	0.9912	3	387	Brain	Brain	3.58542	5.849282978	FALSE	FALSE
CHS.11177.28	CHS.11177.3	SLCO1A2	583	670	0.8701	81	79.3	1.0214	63	387	Brain	Brain	2.364765111	5.849282978	FALSE	FALSE
CHS.11177.30	CHS.11177.3	SLCO1A2	538	670	0.803	80.3	79.3	1.0126	82	387	Brain	Brain	2.039844207	5.849282978	FALSE	FALSE
CHS.11177.31	CHS.11177.3	SLCO1A2	538	670	0.803	80.3	79.3	1.0126	82	387	Brain	Brain	2.039844207	5.849282978	FALSE	FALSE
CHS.11177.32	CHS.11177.3	SLCO1A2	415	670	0.6194	81	79.3	1.0214	1	387	Brain	Brain	2.15478	5.849282978	FALSE	FALSE
CHS.11177.33	CHS.11177.3	SLCO1A2	583	670	0.8701	81	79.3	1.0214	63	387	Brain	Brain	2.364765111	5.849282978	FALSE	FALSE
CHS.11177.34	CHS.11177.3	SLCO1A2	668	670	0.997	79.7	79.3	1.005	517	387	Brain	Brain	7.099235261	5.849282978	FALSE	FALSE
CHS.11177.35	CHS.11177.3	SLCO1A2	583	670	0.8701	81	79.3	1.0214	63	387	Brain	Brain	2.364765111	5.849282978	FALSE	FALSE
CHS.11177.36	CHS.11177.3	SLCO1A2	570	670	0.8507	81	79.3	1.0214	6	387	Brain	Brain	1.539167833	5.849282978	FALSE	FALSE
CHS.11177.37	CHS.11177.3	SLCO1A2	589	670	0.8791	74.7	79.3	0.942	1	387	Brain	Brain	1.31592	5.849282978	FALSE	FALSE
CHS.11177.38	CHS.11177.3	SLCO1A2	538	670	0.803	80.3	79.3	1.0126	82	387	Brain	Brain	2.039844207	5.849282978	FALSE	FALSE
CHS.11177.39	CHS.11177.3	SLCO1A2	538	670	0.803	80.3	79.3	1.0126	82	387	Brain	Brain	2.039844207	5.849282978	TRUE	FALSE
CHS.11177.4	CHS.11177.3	SLCO1A2	670	670	1	79.3	79.3	1	303	387	Brain	Brain	4.647355366	5.849282978	FALSE	FALSE
CHS.11177.40	CHS.11177.3	SLCO1A2	668	670	0.997	79.7	79.3	1.005	517	387	Brain	Brain	7.099235261	5.849282978	FALSE	FALSE
CHS.11177.41	CHS.11177.3	SLCO1A2	538	670	0.803	80.3	79.3	1.0126	82	387	Brain	Brain	2.039844207	5.849282978	FALSE	FALSE
CHS.11177.43	CHS.11177.3	SLCO1A2	670	670	1	79.3	79.3	1	303	387	Brain	Brain	4.647355366	5.849282978	FALSE	FALSE
CHS.11177.46	CHS.11177.3	SLCO1A2	670	670	1	79.3	79.3	1	303	387	Brain	Brain	4.647355366	5.849282978	FALSE	FALSE
CHS.11177.49	CHS.11177.3	SLCO1A2	584	670	0.8716	83.5	79.3	1.053	3	387	Brain	Brain	1.004118	5.849282978	FALSE	FALSE
CHS.11177.51	CHS.11177.3	SLCO1A2	579	670	0.8642	79.4	79.3	1.0013	4	387	Brain	Brain	2.4797325	5.849282978	FALSE	FALSE
CHS.11177.56	CHS.11177.3	SLCO1A2	408	670	0.609	80.2	79.3	1.0113	0	387	-	Brain	0	5.849282978	FALSE	FALSE
CHS.11177.59	CHS.11177.3	SLCO1A2	617	670	0.9209	80.9	79.3	1.0202	0	387	-	Brain	0	5.849282978	FALSE	FALSE
CHS.11177.62	CHS.11177.3	SLCO1A2	517	670	0.7716	83.5	79.3	1.053	0	387	-	Brain	0	5.849282978	FALSE	FALSE
CHS.11178.1	CHS.11178.2	IAPP	89	89	1	58	58	1	348	361	Pancreas	Pancreas	2.72031529	25.24159149	FALSE	FALSE
CHS.11181.3	CHS.11181.1	PYROXD1	335	500	0.67	85.2	87.5	0.9737	241	8927	Pituitary	Small_Intestine	2.20587	12.92648107	FALSE	FALSE
CHS.11181.6	CHS.11181.1	PYROXD1	241	500	0.482	92.6	87.5	1.0583	7681	8927	Nerve	Small_Intestine	4.861791871	12.92648107	FALSE	FALSE
CHS.11181.8	CHS.11181.1	PYROXD1	429	500	0.858	88.5	87.5	1.0114	756	8927	Skin	Small_Intestine	2.007191984	12.92648107	FALSE	FALSE
CHS.11182.3	CHS.11182.4	RECQL	649	649	1	84.5	84.5	1	8596	9498	Bone_Marrow	Blood_Vessel	10.64577667	19.56036403	FALSE	FALSE
CHS.11183.11	CHS.11183.1	GOLT1B	128	138	0.9275	86.5	87.1	0.9931	217	9678	Brain	Bone_Marrow	3.854011953	26.56336667	TRUE	TRUE
CHS.11183.13	CHS.11183.1	GOLT1B	40	138	0.2899	72.2	87.1	0.8289	3472	9678	Lung	Bone_Marrow	4.3420473	26.56336667	TRUE	TRUE
CHS.11183.15	CHS.11183.1	GOLT1B	42	138	0.3043	85.8	87.1	0.9851	1065	9678	Pituitary	Bone_Marrow	4.72797629	26.56336667	FALSE	TRUE
CHS.11183.17	CHS.11183.1	GOLT1B	40	138	0.2899	92.1	87.1	1.0574	1583	9678	Bone_Marrow	Bone_Marrow	4.868964413	26.56336667	FALSE	TRUE
CHS.11183.21	CHS.11183.1	GOLT1B	74	138	0.5362	86	87.1	0.9874	1049	9678	Brain	Bone_Marrow	3.9216078	26.56336667	TRUE	TRUE
CHS.11183.5	CHS.11183.1	GOLT1B	28	138	0.2029	89.5	87.1	1.0276	2071	9678	Ovary	Bone_Marrow	2.351316333	26.56336667	TRUE	TRUE
CHS.11185.1	CHS.11185.3	GYS2	703	703	1	86.1	86.1	1	77	742	Liver	Liver	3.080868769	33.20111974	TRUE	TRUE
CHS.11185.2	CHS.11185.3	GYS2	626	703	0.8905	85.9	86.1	0.9977	3	742	Liver	Liver	3.9081	33.20111974	TRUE	TRUE
CHS.11186.16	CHS.11186.5	LDHB	341	334	1.021	92.8	95.3	0.9738	9787	9264	Bone_Marrow	Heart	1035.861265	1.497220879	TRUE	TRUE
CHS.11186.4	CHS.11186.5	LDHB	334	334	1	95.3	95.3	1	9264	9264	Heart	Heart	1.497220879	1.497220879	TRUE	TRUE
CHS.11189.3	CHS.11189.2	KCNJ8	424	424	1	79.5	79.5	1	2882	8980	Pancreas	Heart	10.42898166	34.21153824	TRUE	TRUE
CHS.11189.4	CHS.11189.2	KCNJ8	424	424	1	79.5	79.5	1	1018	8980	Thyroid	Heart	4.416174441	34.21153824	FALSE	TRUE
CHS.11189.5	CHS.11189.2	KCNJ8	424	424	1	79.5	79.5	1	2882	8980	Pancreas	Heart	10.42898166	34.21153824	TRUE	TRUE
CHS.11192.2	CHS.11192.1	CMAS	263	434	0.606	85.2	86.8	0.9816	9502	9777	Testis	Testis	3.269782802	111.8277213	TRUE	TRUE
CHS.11195.1	CHS.11195.2	ST8SIA1	213	356	0.5983	84.1	88	0.9557	3359	5862	Brain	Brain	1.202996116	3.686530676	TRUE	TRUE
CHS.11195.10	CHS.11195.2	ST8SIA1	111	356	0.3118	85.4	88	0.9705	1	5862	Testis	Brain	0.245552	3.686530676	TRUE	TRUE
CHS.1120.4	CHS.1120.9	YARS1	318	528	0.6023	89.1	89.5	0.9955	1645	9789	Testis	Bone_Marrow	10.41387862	175.4198098	FALSE	TRUE
CHS.1120.7	CHS.1120.9	YARS1	318	528	0.6023	89.1	89.5	0.9955	1645	9789	Testis	Bone_Marrow	10.41387862	175.4198098	TRUE	TRUE
CHS.11205.1	CHS.11205.2	ETNK1	169	363	0.4656	72.5	92.9	0.7804	6456	9435	Bone_Marrow	Bone_Marrow	1.714448363	28.9453098	FALSE	TRUE
CHS.11205.29	CHS.11205.2	ETNK1	260	363	0.7163	85.5	92.9	0.9203	182	9435	Colon	Bone_Marrow	4.802130588	28.9453098	TRUE	TRUE
CHS.11205.3	CHS.11205.2	ETNK1	184	363	0.5069	67.9	92.9	0.7309	3206	9435	Testis	Bone_Marrow	3.256984468	28.9453098	FALSE	TRUE
CHS.11205.4	CHS.11205.2	ETNK1	248	363	0.6832	85.1	92.9	0.916	92	9435	Thyroid	Bone_Marrow	2.18316	28.9453098	TRUE	TRUE
CHS.11205.7	CHS.11205.2	ETNK1	234	363	0.6446	87.8	92.9	0.9451	1419	9435	Fallopian_Tube	Bone_Marrow	5.80299	28.9453098	TRUE	TRUE
CHS.1121.23	CHS.1121.11	S100PBP	342	408	0.8382	50.7	49.2	1.0305	257	9611	Ovary	Testis	1.98627	41.54383188	FALSE	FALSE
CHS.1121.24	CHS.1121.11	S100PBP	348	408	0.8529	50.7	49.2	1.0305	221	9611	Vagina	Testis	1.7431	41.54383188	FALSE	FALSE
CHS.1121.39	CHS.1121.11	S100PBP	407	408	0.9975	49.1	49.2	0.998	1247	9611	Testis	Testis	4.429306122	41.54383188	FALSE	FALSE
CHS.1121.4	CHS.1121.11	S100PBP	408	408	1	49.2	49.2	1	5300	9611	Cervix_Uteri	Testis	1.554935667	41.54383188	FALSE	FALSE
CHS.11210.22	CHS.11210.31	SOX5	715	763	0.9371	54.7	53.4	1.0243	732	2115	Vagina	Pancreas	3.508584286	3.73561	TRUE	TRUE
CHS.11210.24	CHS.11210.31	SOX5	750	763	0.983	53.4	53.4	1	1251	2115	Testis	Pancreas	5.66017375	3.73561	TRUE	TRUE
CHS.11210.30	CHS.11210.31	SOX5	377	763	0.4941	61.8	53.4	1.1573	237	2115	Testis	Pancreas	5.558809323	3.73561	TRUE	TRUE
CHS.11210.32	CHS.11210.31	SOX5	753	763	0.9869	53.2	53.4	0.9963	389	2115	Ovary	Pancreas	1.815016	3.73561	TRUE	TRUE
CHS.11210.33	CHS.11210.31	SOX5	750	763	0.983	53.4	53.4	1	1251	2115	Testis	Pancreas	5.66017375	3.73561	TRUE	TRUE
CHS.11210.34	CHS.11210.31	SOX5	642	763	0.8414	55.3	53.4	1.0356	727	2115	Salivary_Gland	Pancreas	0.682681	3.73561	TRUE	TRUE
CHS.11210.9	CHS.11210.31	SOX5	728	763	0.9541	54.6	53.4	1.0225	2001	2115	Muscle	Pancreas	3.32752	3.73561	TRUE	TRUE
CHS.11219.1	CHS.11219.5	BCAT1	385	386	0.9974	92.5	92.2	1.0033	3277	4235	Cervix_Uteri	Bone_Marrow	5.07729	70.10560784	TRUE	FALSE
CHS.11219.10	CHS.11219.5	BCAT1	362	386	0.9378	95.9	92.2	1.0401	171	4235	Ovary	Bone_Marrow	2.4593706	70.10560784	FALSE	FALSE
CHS.11219.13	CHS.11219.5	BCAT1	420	386	1.0881	79.7	92.2	0.8644	59	4235	Thyroid	Bone_Marrow	1.70488	70.10560784	FALSE	FALSE
CHS.11219.2	CHS.11219.5	BCAT1	398	386	1.0311	90.6	92.2	0.9826	4116	4235	Lung	Bone_Marrow	5.789086	70.10560784	FALSE	FALSE
CHS.11219.25	CHS.11219.5	BCAT1	348	386	0.9016	89	92.2	0.9653	23	4235	Nerve	Bone_Marrow	3.84918	70.10560784	FALSE	FALSE
CHS.11219.29	CHS.11219.5	BCAT1	320	386	0.829	89.3	92.2	0.9685	3	4235	Lung	Bone_Marrow	0.655338	70.10560784	FALSE	FALSE
CHS.11219.3	CHS.11219.5	BCAT1	325	386	0.842	92.1	92.2	0.9989	672	4235	Bone_Marrow	Bone_Marrow	2.31138879	70.10560784	FALSE	FALSE
CHS.11219.4	CHS.11219.5	BCAT1	349	386	0.9041	88.9	92.2	0.9642	1955	4235	Bone_Marrow	Bone_Marrow	3.014691386	70.10560784	FALSE	FALSE
CHS.1122.19	CHS.1122.5	FNDC5	217	212	1.0236	74.8	74.8	1	1441	2963	Muscle	Muscle	12.42744265	17.47376985	FALSE	TRUE
CHS.1122.23	CHS.1122.5	FNDC5	223	212	1.0519	73.8	74.8	0.9866	3939	2963	Muscle	Muscle	13.30086811	17.47376985	FALSE	TRUE
CHS.1122.4	CHS.1122.5	FNDC5	181	212	0.8538	82	74.8	1.0963	0	2963	-	Muscle	0	17.47376985	TRUE	TRUE
CHS.1122.8	CHS.1122.5	FNDC5	153	212	0.7217	64.9	74.8	0.8676	3226	2963	Muscle	Muscle	30.1344211	17.47376985	TRUE	TRUE
CHS.11226.10	CHS.11226.2	IRAG2	499	499	1	57.6	57.6	1	5164	5164	Blood	Blood	30.71422551	30.71422551	TRUE	FALSE
CHS.11226.11	CHS.11226.2	IRAG2	499	499	1	57.6	57.6	1	5164	5164	Blood	Blood	30.71422551	30.71422551	TRUE	FALSE
CHS.11226.17	CHS.11226.2	IRAG2	446	499	0.8938	61.2	57.6	1.0625	551	5164	Vagina	Blood	15.88114617	30.71422551	FALSE	FALSE
CHS.11226.3	CHS.11226.2	IRAG2	499	499	1	57.6	57.6	1	5164	5164	Blood	Blood	30.71422551	30.71422551	FALSE	FALSE
CHS.11226.32	CHS.11226.2	IRAG2	499	499	1	57.6	57.6	1	5164	5164	Blood	Blood	30.71422551	30.71422551	FALSE	FALSE
CHS.11226.34	CHS.11226.2	IRAG2	348	499	0.6974	63.3	57.6	1.099	30	5164	Spleen	Blood	1.969735	30.71422551	FALSE	FALSE
CHS.11226.35	CHS.11226.2	IRAG2	446	499	0.8938	61.2	57.6	1.0625	551	5164	Vagina	Blood	15.88114617	30.71422551	FALSE	FALSE
CHS.11226.39	CHS.11226.2	IRAG2	499	499	1	57.6	57.6	1	5164	5164	Blood	Blood	30.71422551	30.71422551	TRUE	FALSE
CHS.11226.47	CHS.11226.2	IRAG2	487	499	0.976	53.8	57.6	0.934	0	5164	-	Blood	0	30.71422551	TRUE	FALSE
CHS.11226.5	CHS.11226.2	IRAG2	499	499	1	57.6	57.6	1	5164	5164	Blood	Blood	30.71422551	30.71422551	TRUE	FALSE
CHS.11226.7	CHS.11226.2	IRAG2	499	499	1	57.6	57.6	1	5164	5164	Blood	Blood	30.71422551	30.71422551	FALSE	FALSE
CHS.11226.8	CHS.11226.2	IRAG2	499	499	1	57.6	57.6	1	5164	5164	Blood	Blood	30.71422551	30.71422551	FALSE	FALSE
CHS.11227.15	CHS.11227.6	DNAI7	570	722	0.7895	81.8	84.3	0.9703	0	521	-	Testis	0	17.93983348	FALSE	FALSE
CHS.11227.16	CHS.11227.6	DNAI7	551	722	0.7632	81.8	84.3	0.9703	3	521	Thyroid	Testis	1.575955	17.93983348	FALSE	FALSE
CHS.11227.18	CHS.11227.6	DNAI7	610	722	0.8449	81.9	84.3	0.9715	80	521	Ovary	Testis	1.84418	17.93983348	FALSE	FALSE
CHS.11227.19	CHS.11227.6	DNAI7	455	722	0.6302	78.6	84.3	0.9324	25	521	Thyroid	Testis	2.130119625	17.93983348	FALSE	FALSE
CHS.11227.2	CHS.11227.6	DNAI7	657	722	0.91	84.7	84.3	1.0047	268	521	Pituitary	Testis	1.622113538	17.93983348	FALSE	FALSE
CHS.11227.20	CHS.11227.6	DNAI7	626	722	0.867	83.3	84.3	0.9881	2	521	Adrenal_Gland	Testis	1.17492	17.93983348	FALSE	FALSE
CHS.11227.21	CHS.11227.6	DNAI7	616	722	0.8532	81.2	84.3	0.9632	12	521	Brain	Testis	0.934388	17.93983348	FALSE	FALSE
CHS.11227.22	CHS.11227.6	DNAI7	604	722	0.8366	84.8	84.3	1.0059	8	521	Lung	Testis	2.34568	17.93983348	FALSE	FALSE
CHS.11227.23	CHS.11227.6	DNAI7	676	722	0.9363	85.2	84.3	1.0107	8	521	Pituitary	Testis	3.5627	17.93983348	FALSE	FALSE
CHS.11227.29	CHS.11227.6	DNAI7	233	722	0.3227	86.6	84.3	1.0273	10	521	Uterus	Testis	2.52261	17.93983348	FALSE	FALSE
CHS.11227.3	CHS.11227.6	DNAI7	514	722	0.7119	83.5	84.3	0.9905	385	521	Pituitary	Testis	0.938258	17.93983348	FALSE	FALSE
CHS.11227.31	CHS.11227.6	DNAI7	267	722	0.3698	85.8	84.3	1.0178	33	521	Colon	Testis	2.3268	17.93983348	FALSE	FALSE
CHS.11227.32	CHS.11227.6	DNAI7	480	722	0.6648	79.8	84.3	0.9466	2	521	Brain	Testis	1.5497	17.93983348	FALSE	FALSE
CHS.11227.33	CHS.11227.6	DNAI7	335	722	0.464	86.1	84.3	1.0214	6	521	Thyroid	Testis	1.75801525	17.93983348	FALSE	FALSE
CHS.11227.34	CHS.11227.6	DNAI7	537	722	0.7438	85	84.3	1.0083	1	521	Nerve	Testis	1.08015	17.93983348	FALSE	FALSE
CHS.11227.38	CHS.11227.6	DNAI7	559	722	0.7742	82.8	84.3	0.9822	7	521	Pituitary	Testis	1.508876667	17.93983348	FALSE	FALSE
CHS.11227.4	CHS.11227.6	DNAI7	716	722	0.9917	84.5	84.3	1.0024	1139	521	Fallopian_Tube	Testis	16.3216	17.93983348	FALSE	FALSE
CHS.11227.40	CHS.11227.6	DNAI7	343	722	0.4751	78.5	84.3	0.9312	0	521	-	Testis	0	17.93983348	FALSE	FALSE
CHS.11227.5	CHS.11227.6	DNAI7	676	722	0.9363	85.2	84.3	1.0107	8	521	Pituitary	Testis	3.5627	17.93983348	FALSE	FALSE
CHS.11227.7	CHS.11227.6	DNAI7	676	722	0.9363	85.2	84.3	1.0107	8	521	Pituitary	Testis	3.5627	17.93983348	FALSE	FALSE
CHS.11227.8	CHS.11227.6	DNAI7	690	722	0.9557	78.2	84.3	0.9276	237	521	Fallopian_Tube	Testis	5.84885	17.93983348	FALSE	FALSE
CHS.11228.6	CHS.11228.1	ETFRF1	90	90	1	90.1	90.1	1	8908	9763	Muscle	Testis	5.549914294	48.377043	FALSE	FALSE
CHS.11228.7	CHS.11228.1	ETFRF1	90	90	1	90.1	90.1	1	8908	9763	Muscle	Testis	5.549914294	48.377043	FALSE	FALSE
CHS.11229.10	CHS.11229.1	KRAS	189	188	1.0053	86	86.4	0.9954	4197	9486	Colon	Nerve	7.2946897	26.28765284	FALSE	TRUE
CHS.11229.2	CHS.11229.1	KRAS	189	188	1.0053	86	86.4	0.9954	4197	9486	Colon	Nerve	7.2946897	26.28765284	TRUE	TRUE
CHS.11229.6	CHS.11229.1	KRAS	188	188	1	86.4	86.4	1	1487	9486	Pituitary	Nerve	1.484940818	26.28765284	TRUE	TRUE
CHS.11239.1	CHS.11239.3	LMNTD1	291	409	0.7115	63.8	55.2	1.1558	40	146	Testis	Testis	0.57982585	1.363898747	FALSE	FALSE
CHS.11239.10	CHS.11239.3	LMNTD1	369	409	0.9022	48.5	55.2	0.8786	84	146	Testis	Testis	0.393133405	1.363898747	FALSE	FALSE
CHS.11239.2	CHS.11239.3	LMNTD1	388	409	0.9487	54	55.2	0.9783	176	146	Testis	Testis	1.36856836	1.363898747	FALSE	FALSE
CHS.11239.34	CHS.11239.3	LMNTD1	409	409	1	55.2	55.2	1	25	146	Testis	Testis	2.3679692	1.363898747	FALSE	FALSE
CHS.11239.36	CHS.11239.3	LMNTD1	363	409	0.8875	57.1	55.2	1.0344	23	146	Lung	Testis	2.2274823	1.363898747	FALSE	FALSE
CHS.11239.37	CHS.11239.3	LMNTD1	218	409	0.533	63.6	55.2	1.1522	28	146	Lung	Testis	1.816240857	1.363898747	FALSE	FALSE
CHS.11239.52	CHS.11239.3	LMNTD1	363	409	0.8875	57.1	55.2	1.0344	19	146	Testis	Testis	2.258217211	1.363898747	FALSE	FALSE
CHS.11239.6	CHS.11239.3	LMNTD1	363	409	0.8875	57.1	55.2	1.0344	23	146	Lung	Testis	2.2274823	1.363898747	FALSE	FALSE
CHS.11239.7	CHS.11239.3	LMNTD1	363	409	0.8875	57.1	55.2	1.0344	23	146	Lung	Testis	2.2274823	1.363898747	FALSE	FALSE
CHS.11239.8	CHS.11239.3	LMNTD1	363	409	0.8875	57.1	55.2	1.0344	23	146	Lung	Testis	2.2274823	1.363898747	FALSE	FALSE
CHS.11239.9	CHS.11239.3	LMNTD1	325	409	0.7946	60.4	55.2	1.0942	87	146	Pituitary	Testis	1.401034	1.363898747	FALSE	FALSE
CHS.1124.1	CHS.1124.14	HPCA	193	193	1	84.7	84.7	1	1544	1991	Brain	Brain	24.15877133	301.9402628	TRUE	TRUE
CHS.1124.13	CHS.1124.14	HPCA	63	193	0.3264	70.2	84.7	0.8288	320	1991	Brain	Brain	4.478883041	301.9402628	TRUE	TRUE
CHS.1124.15	CHS.1124.14	HPCA	193	193	1	84.7	84.7	1	1544	1991	Brain	Brain	24.15877133	301.9402628	TRUE	TRUE
CHS.1124.19	CHS.1124.14	HPCA	168	193	0.8705	75.1	84.7	0.8867	203	1991	Testis	Brain	12.37280955	301.9402628	TRUE	TRUE
CHS.11242.1	CHS.11242.5	RASSF8	419	419	1	75.1	75.1	1	4352	4858	Nerve	Testis	9.62921577	16.03925113	FALSE	FALSE
CHS.11242.18	CHS.11242.5	RASSF8	419	419	1	75.1	75.1	1	4352	4858	Nerve	Testis	9.62921577	16.03925113	FALSE	FALSE
CHS.11242.19	CHS.11242.5	RASSF8	419	419	1	75.1	75.1	1	4352	4858	Nerve	Testis	9.62921577	16.03925113	FALSE	FALSE
CHS.11242.2	CHS.11242.5	RASSF8	419	419	1	75.1	75.1	1	4352	4858	Nerve	Testis	9.62921577	16.03925113	FALSE	FALSE
CHS.11242.24	CHS.11242.5	RASSF8	419	419	1	75.1	75.1	1	4352	4858	Nerve	Testis	9.62921577	16.03925113	FALSE	FALSE
CHS.11242.30	CHS.11242.5	RASSF8	419	419	1	75.1	75.1	1	4352	4858	Nerve	Testis	9.62921577	16.03925113	FALSE	FALSE
CHS.11242.31	CHS.11242.5	RASSF8	419	419	1	75.1	75.1	1	4352	4858	Nerve	Testis	9.62921577	16.03925113	FALSE	FALSE
CHS.11242.32	CHS.11242.5	RASSF8	395	419	0.9427	77.9	75.1	1.0373	112	4858	Uterus	Testis	4.958030333	16.03925113	FALSE	FALSE
CHS.11242.34	CHS.11242.5	RASSF8	419	419	1	75.1	75.1	1	4352	4858	Nerve	Testis	9.62921577	16.03925113	FALSE	FALSE
CHS.11242.36	CHS.11242.5	RASSF8	419	419	1	75.1	75.1	1	4352	4858	Nerve	Testis	9.62921577	16.03925113	FALSE	FALSE
CHS.11242.37	CHS.11242.5	RASSF8	419	419	1	75.1	75.1	1	4352	4858	Nerve	Testis	9.62921577	16.03925113	FALSE	FALSE
CHS.11242.8	CHS.11242.5	RASSF8	419	419	1	75.1	75.1	1	4352	4858	Nerve	Testis	9.62921577	16.03925113	FALSE	FALSE
CHS.11242.9	CHS.11242.5	RASSF8	392	419	0.9356	77.9	75.1	1.0373	1151	4858	Testis	Testis	0.961277417	16.03925113	FALSE	FALSE
CHS.11247.1	CHS.11247.7	SSPN	140	243	0.5761	76	69.4	1.0951	5217	8136	Fallopian_Tube	Blood_Vessel	4.963277143	35.92445891	TRUE	TRUE
CHS.11247.4	CHS.11247.7	SSPN	140	243	0.5761	76	69.4	1.0951	5217	8136	Fallopian_Tube	Blood_Vessel	4.963277143	35.92445891	TRUE	TRUE
CHS.11247.6	CHS.11247.7	SSPN	140	243	0.5761	76	69.4	1.0951	5217	8136	Fallopian_Tube	Blood_Vessel	4.963277143	35.92445891	TRUE	TRUE
CHS.1125.13	CHS.1125.3	TMEM54	189	222	0.8514	63.6	75.8	0.8391	8751	9287	Colon	Colon	10.61248113	202.5415062	TRUE	TRUE
CHS.1125.14	CHS.1125.3	TMEM54	202	222	0.9099	65.1	75.8	0.8588	7839	9287	Colon	Colon	6.754387551	202.5415062	TRUE	TRUE
CHS.1125.17	CHS.1125.3	TMEM54	169	222	0.7613	59.3	75.8	0.7823	8700	9287	Colon	Colon	3.701779924	202.5415062	TRUE	TRUE
CHS.1125.4	CHS.1125.3	TMEM54	240	222	1.0811	72.7	75.8	0.9591	4418	9287	Skin	Colon	10.70948119	202.5415062	TRUE	TRUE
CHS.11256.1	CHS.11256.9	INTS13	655	706	0.9278	74.8	78.8	0.9492	120	9220	Bone_Marrow	Bone_Marrow	1.496271313	39.04387549	TRUE	TRUE
CHS.11256.10	CHS.11256.9	INTS13	712	706	1.0085	78	78.8	0.9898	30	9220	Vagina	Bone_Marrow	2.06424	39.04387549	TRUE	TRUE
CHS.11256.11	CHS.11256.9	INTS13	681	706	0.9646	76.2	78.8	0.967	88	9220	Vagina	Bone_Marrow	5.539016667	39.04387549	TRUE	TRUE
CHS.11256.15	CHS.11256.9	INTS13	436	706	0.6176	84.9	78.8	1.0774	2652	9220	Cervix_Uteri	Bone_Marrow	4.035206667	39.04387549	TRUE	TRUE
CHS.11256.22	CHS.11256.9	INTS13	648	706	0.9178	75.5	78.8	0.9581	129	9220	Bone_Marrow	Bone_Marrow	2.39125555	39.04387549	TRUE	TRUE
CHS.11256.5	CHS.11256.9	INTS13	631	706	0.8938	75.8	78.8	0.9619	269	9220	Ovary	Bone_Marrow	2.21032	39.04387549	TRUE	TRUE
CHS.11256.6	CHS.11256.9	INTS13	649	706	0.9193	75.9	78.8	0.9632	795	9220	Bone_Marrow	Bone_Marrow	3.185034816	39.04387549	TRUE	TRUE
CHS.11256.7	CHS.11256.9	INTS13	637	706	0.9023	75.9	78.8	0.9632	14	9220	Esophagus	Bone_Marrow	1.06738	39.04387549	TRUE	TRUE
CHS.11256.8	CHS.11256.9	INTS13	687	706	0.9731	76.3	78.8	0.9683	15	9220	Ovary	Bone_Marrow	3.35755	39.04387549	TRUE	TRUE
CHS.11257.1	CHS.11257.2	FGFR1OP2	172	253	0.6798	81.7	83	0.9843	9784	9604	Adrenal_Gland	Bone_Marrow	6.24079736	18.46084196	FALSE	FALSE
CHS.11257.10	CHS.11257.2	FGFR1OP2	172	253	0.6798	81.7	83	0.9843	5685	9604	Ovary	Bone_Marrow	14.13632589	18.46084196	FALSE	FALSE
CHS.11257.3	CHS.11257.2	FGFR1OP2	215	253	0.8498	84.7	83	1.0205	9755	9604	Brain	Bone_Marrow	16.9032432	18.46084196	FALSE	FALSE
CHS.11257.7	CHS.11257.2	FGFR1OP2	140	253	0.5534	87.3	83	1.0518	1468	9604	Ovary	Bone_Marrow	16.0513791	18.46084196	FALSE	FALSE
CHS.11258.10	CHS.11258.12	TM7SF3	414	570	0.7263	84.4	87.7	0.9624	1595	9706	Skin	Adrenal_Gland	5.558295919	31.45378888	TRUE	TRUE
CHS.11258.11	CHS.11258.12	TM7SF3	600	570	1.0526	83.7	87.7	0.9544	17	9706	Lung	Adrenal_Gland	2.38306	31.45378888	TRUE	TRUE
CHS.11258.2	CHS.11258.12	TM7SF3	417	570	0.7316	81.3	87.7	0.927	39	9706	Stomach	Adrenal_Gland	1.6071	31.45378888	TRUE	TRUE
CHS.11258.3	CHS.11258.12	TM7SF3	468	570	0.8211	87.3	87.7	0.9954	70	9706	Colon	Adrenal_Gland	1.73394	31.45378888	TRUE	TRUE
CHS.11258.8	CHS.11258.12	TM7SF3	363	570	0.6368	83.3	87.7	0.9498	1059	9706	Testis	Adrenal_Gland	2.959930016	31.45378888	TRUE	TRUE
CHS.11258.9	CHS.11258.12	TM7SF3	519	570	0.9105	83	87.7	0.9464	1914	9706	Testis	Adrenal_Gland	2.955952662	31.45378888	TRUE	TRUE
CHS.11261.12	CHS.11261.2	MED21	159	144	1.1042	78.3	82.3	0.9514	61	9749	Thyroid	Uterus	3.3132	22.89038781	TRUE	TRUE
CHS.11261.13	CHS.11261.2	MED21	144	144	1	82.3	82.3	1	1217	9749	Uterus	Uterus	3.880399286	22.89038781	FALSE	TRUE
CHS.11261.3	CHS.11261.2	MED21	68	144	0.4722	82.1	82.3	0.9976	133	9749	Esophagus	Uterus	3.457043636	22.89038781	TRUE	TRUE
CHS.11261.4	CHS.11261.2	MED21	32	144	0.2222	81.5	82.3	0.9903	7166	9749	Nerve	Uterus	1.048559112	22.89038781	TRUE	TRUE
CHS.11264.2	CHS.11264.1	C12orf71	269	269	1	51.3	51.3	1	156	499	Testis	Cervix_Uteri	5.249968064	1.92422	TRUE	TRUE
CHS.11266.1	CHS.11266.4	STK38L	423	464	0.9116	75.6	82.7	0.9141	65	9551	Thyroid	Blood_Vessel	4.19285	95.37352057	TRUE	TRUE
CHS.11266.35	CHS.11266.4	STK38L	521	464	1.1228	74.3	82.7	0.8984	1057	9551	Blood_Vessel	Blood_Vessel	29.37021301	95.37352057	TRUE	TRUE
CHS.11268.1	CHS.11268.4	ARNTL2	602	636	0.9465	61.7	60.2	1.0249	33	1041	Adipose_Tissue	Blood	2.84588	3.217730103	FALSE	FALSE
CHS.11268.10	CHS.11268.4	ARNTL2	633	636	0.9953	59.3	60.2	0.985	27	1041	Blood_Vessel	Blood	2.81871	3.217730103	FALSE	FALSE
CHS.11268.14	CHS.11268.4	ARNTL2	568	636	0.8931	59.2	60.2	0.9834	8	1041	Adipose_Tissue	Blood	1.69801	3.217730103	FALSE	FALSE
CHS.11268.2	CHS.11268.4	ARNTL2	599	636	0.9418	61.4	60.2	1.0199	2053	1041	Cervix_Uteri	Blood	4.60163	3.217730103	FALSE	FALSE
CHS.11268.25	CHS.11268.4	ARNTL2	557	636	0.8758	59.3	60.2	0.985	74	1041	Lung	Blood	1.74381	3.217730103	FALSE	FALSE
CHS.11268.3	CHS.11268.4	ARNTL2	540	636	0.8491	63.8	60.2	1.0598	556	1041	Fallopian_Tube	Blood	0.595232	3.217730103	FALSE	FALSE
CHS.11268.33	CHS.11268.4	ARNTL2	585	636	0.9198	62.5	60.2	1.0382	0	1041	-	Blood	0	3.217730103	FALSE	FALSE
CHS.11268.5	CHS.11268.4	ARNTL2	622	636	0.978	60.7	60.2	1.0083	2365	1041	Blood	Blood	5.462541196	3.217730103	FALSE	FALSE
CHS.11268.6	CHS.11268.4	ARNTL2	588	636	0.9245	62.7	60.2	1.0415	3872	1041	Blood	Blood	12.61981374	3.217730103	FALSE	FALSE
CHS.11268.9	CHS.11268.4	ARNTL2	647	636	1.0173	59.2	60.2	0.9834	6	1041	Skin	Blood	5.8164385	3.217730103	FALSE	FALSE
CHS.11270.19	CHS.11270.3	SMCO2	271	343	0.7901	57	63.8	0.8934	221	61	Pituitary	Testis	2.20388	2.282727426	TRUE	FALSE
CHS.11270.2	CHS.11270.3	SMCO2	214	343	0.6239	63.3	63.8	0.9922	9	61	Testis	Testis	1.073815778	2.282727426	FALSE	FALSE
CHS.11278.3	CHS.11278.2	MRPS35	194	323	0.6006	74.2	81	0.916	8341	9767	Bone_Marrow	Bone_Marrow	3.658218333	98.01022157	FALSE	FALSE
CHS.1128.15	CHS.1128.14	RNF19B	587	731	0.803	62.3	56.1	1.1105	9661	9770	Testis	Testis	20.97376918	59.69212459	TRUE	TRUE
CHS.1128.16	CHS.1128.14	RNF19B	732	731	1.0014	55.7	56.1	0.9929	9603	9770	Testis	Testis	45.72616966	59.69212459	TRUE	TRUE
CHS.11280.3	CHS.11280.5	MANSC4	340	340	1	58.2	58.2	1	732	0	Testis	-	2.763197799	0	TRUE	FALSE
CHS.11282.13	CHS.11282.7	KLHL42	357	505	0.7069	86.3	86.8	0.9942	539	9343	Bladder	Bladder	2.13479	19.15881818	TRUE	TRUE
CHS.11282.3	CHS.11282.7	KLHL42	369	505	0.7307	84.6	86.8	0.9747	6754	9343	Bladder	Bladder	10.179245	19.15881818	TRUE	TRUE
CHS.11285.1	CHS.11285.5	PTHLH	177	177	1	60.6	60.6	1	4371	4371	Vagina	Vagina	10.46107152	10.46107152	FALSE	FALSE
CHS.11285.12	CHS.11285.5	PTHLH	209	177	1.1808	61	60.6	1.0066	626	4371	Breast	Vagina	1.829322226	10.46107152	FALSE	FALSE
CHS.11285.13	CHS.11285.5	PTHLH	175	177	0.9887	60.2	60.6	0.9934	3201	4371	Breast	Vagina	3.988589375	10.46107152	FALSE	FALSE
CHS.11285.14	CHS.11285.5	PTHLH	175	177	0.9887	60.2	60.6	0.9934	3201	4371	Breast	Vagina	3.988589375	10.46107152	FALSE	FALSE
CHS.11285.16	CHS.11285.5	PTHLH	177	177	1	60.6	60.6	1	4371	4371	Vagina	Vagina	10.46107152	10.46107152	FALSE	FALSE
CHS.11293.10	CHS.11293.1	CCDC91	279	441	0.6327	85.7	73.5	1.166	1145	9210	Pituitary	Brain	1.838115583	15.02951328	TRUE	TRUE
CHS.11293.11	CHS.11293.1	CCDC91	432	441	0.9796	74.4	73.5	1.0122	238	9210	Thyroid	Brain	1.814207	15.02951328	TRUE	TRUE
CHS.11293.12	CHS.11293.1	CCDC91	441	441	1	73.5	73.5	1	4438	9210	Bladder	Brain	3.573312	15.02951328	FALSE	TRUE
CHS.11293.15	CHS.11293.1	CCDC91	411	441	0.932	75.7	73.5	1.0299	220	9210	Testis	Brain	94.76836313	15.02951328	FALSE	TRUE
CHS.11293.2	CHS.11293.1	CCDC91	405	441	0.9184	75.6	73.5	1.0286	6485	9210	Testis	Brain	2.283792877	15.02951328	TRUE	TRUE
CHS.11293.37	CHS.11293.1	CCDC91	263	441	0.5964	86.7	73.5	1.1796	113	9210	Brain	Brain	1.223843093	15.02951328	TRUE	TRUE
CHS.11293.4	CHS.11293.1	CCDC91	441	441	1	73.5	73.5	1	4438	9210	Bladder	Brain	3.573312	15.02951328	FALSE	TRUE
CHS.11293.42	CHS.11293.1	CCDC91	441	441	1	73.5	73.5	1	4438	9210	Bladder	Brain	3.573312	15.02951328	FALSE	TRUE
CHS.11293.44	CHS.11293.1	CCDC91	441	441	1	73.5	73.5	1	4438	9210	Bladder	Brain	3.573312	15.02951328	FALSE	TRUE
CHS.11293.48	CHS.11293.1	CCDC91	415	441	0.941	74.9	73.5	1.019	32	9210	Nerve	Brain	2.64598	15.02951328	TRUE	TRUE
CHS.11293.5	CHS.11293.1	CCDC91	432	441	0.9796	74.4	73.5	1.0122	238	9210	Thyroid	Brain	1.814207	15.02951328	FALSE	TRUE
CHS.11293.57	CHS.11293.1	CCDC91	267	441	0.6054	70	73.5	0.9524	6	9210	Testis	Brain	2.287695	15.02951328	TRUE	TRUE
CHS.11293.6	CHS.11293.1	CCDC91	441	441	1	73.5	73.5	1	4438	9210	Bladder	Brain	3.573312	15.02951328	TRUE	TRUE
CHS.11293.60	CHS.11293.1	CCDC91	375	441	0.8503	77.8	73.5	1.0585	5	9210	Skin	Brain	1.93773	15.02951328	TRUE	TRUE
CHS.11293.7	CHS.11293.1	CCDC91	441	441	1	73.5	73.5	1	4438	9210	Bladder	Brain	3.573312	15.02951328	FALSE	TRUE
CHS.11293.88	CHS.11293.1	CCDC91	432	441	0.9796	73.8	73.5	1.0041	179	9210	Nerve	Brain	1.3541225	15.02951328	TRUE	TRUE
CHS.11301.1	CHS.11301.2	FAR2	470	515	0.9126	93.9	93.7	1.0021	198	6657	Spleen	Colon	1.5513472	11.49990592	TRUE	TRUE
CHS.11301.10	CHS.11301.2	FAR2	515	515	1	93.7	93.7	1	2691	6657	Skin	Colon	4.428419072	11.49990592	TRUE	TRUE
CHS.11301.11	CHS.11301.2	FAR2	418	515	0.8117	93.8	93.7	1.0011	1019	6657	Fallopian_Tube	Colon	0.706878	11.49990592	TRUE	TRUE
CHS.11301.14	CHS.11301.2	FAR2	462	515	0.8971	95	93.7	1.0139	813	6657	Kidney	Colon	2.85222	11.49990592	TRUE	TRUE
CHS.11301.8	CHS.11301.2	FAR2	490	515	0.9515	91.3	93.7	0.9744	13	6657	Spleen	Colon	1.74046	11.49990592	TRUE	TRUE
CHS.11305.11	CHS.11305.3	ERGIC2	345	377	0.9151	76.9	79.9	0.9625	684	9729	Spleen	Blood_Vessel	2.19182725	12.88382479	TRUE	TRUE
CHS.11305.2	CHS.11305.3	ERGIC2	377	377	1	79.9	79.9	1	4134	9729	Testis	Blood_Vessel	6.721618706	12.88382479	FALSE	TRUE
CHS.11308.11	CHS.11308.1	TMTC1	668	882	0.7574	83	87.1	0.9529	741	7547	Nerve	Blood_Vessel	2.562995202	9.17386891	TRUE	TRUE
CHS.11308.14	CHS.11308.1	TMTC1	705	882	0.7993	89.8	87.1	1.031	1	7547	Brain	Blood_Vessel	0.923427	9.17386891	TRUE	TRUE
CHS.11308.15	CHS.11308.1	TMTC1	824	882	0.9342	86.5	87.1	0.9931	1	7547	Lung	Blood_Vessel	1.57105	9.17386891	TRUE	TRUE
CHS.11308.2	CHS.11308.1	TMTC1	774	882	0.8776	88.1	87.1	1.0115	1403	7547	Nerve	Blood_Vessel	2.92814981	9.17386891	TRUE	TRUE
CHS.11308.3	CHS.11308.1	TMTC1	813	882	0.9218	88.6	87.1	1.0172	271	7547	Blood_Vessel	Blood_Vessel	2.95129922	9.17386891	TRUE	TRUE
CHS.11308.4	CHS.11308.1	TMTC1	875	882	0.9921	91.1	87.1	1.0459	1293	7547	Blood_Vessel	Blood_Vessel	5.732177437	9.17386891	TRUE	TRUE
CHS.11308.5	CHS.11308.1	TMTC1	944	882	1.0703	86.5	87.1	0.9931	7900	7547	Blood_Vessel	Blood_Vessel	27.17250804	9.17386891	TRUE	TRUE
CHS.11308.6	CHS.11308.1	TMTC1	888	882	1.0068	84.6	87.1	0.9713	261	7547	Blood_Vessel	Blood_Vessel	2.108945786	9.17386891	TRUE	TRUE
CHS.11321.16	CHS.11321.5	IPO8	902	1037	0.8698	89.6	87.2	1.0275	162	9221	Nerve	Bone_Marrow	6.32236	27.20107059	FALSE	FALSE
CHS.11321.19	CHS.11321.5	IPO8	975	1037	0.9402	88.5	87.2	1.0149	1558	9221	Nerve	Bone_Marrow	6.994628167	27.20107059	FALSE	FALSE
CHS.11321.2	CHS.11321.5	IPO8	832	1037	0.8023	86.5	87.2	0.992	4066	9221	Testis	Bone_Marrow	2.911031335	27.20107059	FALSE	FALSE
CHS.11321.6	CHS.11321.5	IPO8	851	1037	0.8206	85	87.2	0.9748	113	9221	Testis	Bone_Marrow	3.46633646	27.20107059	FALSE	FALSE
CHS.11329.18	CHS.11329.6	TSPAN11	270	253	1.0672	74.1	85.8	0.8636	193	4946	Bladder	Nerve	2.82336	20.31611785	TRUE	TRUE
CHS.11329.20	CHS.11329.6	TSPAN11	243	253	0.9605	83.1	85.8	0.9685	2	4946	Brain	Nerve	0.801173	20.31611785	TRUE	TRUE
CHS.11329.4	CHS.11329.6	TSPAN11	273	253	1.0791	79.8	85.8	0.9301	2	4946	Lung	Nerve	0.477377	20.31611785	TRUE	TRUE
CHS.11329.5	CHS.11329.6	TSPAN11	246	253	0.9723	85	85.8	0.9907	61	4946	Brain	Nerve	1.873409471	20.31611785	TRUE	TRUE
CHS.11329.9	CHS.11329.6	TSPAN11	253	253	1	85.8	85.8	1	925	4946	Nerve	Nerve	5.331371771	20.31611785	TRUE	TRUE
CHS.1133.15	CHS.1133.14	AK2	191	239	0.7992	87.2	89.7	0.9721	9664	9796	Brain	Bone_Marrow	13.23914626	61.78189902	FALSE	TRUE
CHS.1133.16	CHS.1133.14	AK2	133	239	0.5565	81.2	89.7	0.9052	9659	9796	Bone_Marrow	Bone_Marrow	7.940834902	61.78189902	TRUE	TRUE
CHS.1133.2	CHS.1133.14	AK2	190	239	0.795	86.1	89.7	0.9599	9105	9796	Bone_Marrow	Bone_Marrow	7.140351284	61.78189902	TRUE	TRUE
CHS.1133.21	CHS.1133.14	AK2	162	239	0.6778	80.6	89.7	0.8986	41	9796	Salivary_Gland	Bone_Marrow	5.72395	61.78189902	TRUE	TRUE
CHS.1133.22	CHS.1133.14	AK2	197	239	0.8243	82.3	89.7	0.9175	9	9796	Colon	Bone_Marrow	2.82897	61.78189902	TRUE	TRUE
CHS.1133.3	CHS.1133.14	AK2	133	239	0.5565	81.2	89.7	0.9052	9658	9796	Bone_Marrow	Bone_Marrow	14.40075265	61.78189902	TRUE	TRUE
CHS.1133.4	CHS.1133.14	AK2	224	239	0.9372	86.7	89.7	0.9666	0	9796	-	Bone_Marrow	0	61.78189902	TRUE	TRUE
CHS.1133.5	CHS.1133.14	AK2	232	239	0.9707	91.4	89.7	1.019	9794	9796	Bone_Marrow	Bone_Marrow	150.1282441	61.78189902	TRUE	TRUE
CHS.1133.6	CHS.1133.14	AK2	232	239	0.9707	91.3	89.7	1.0178	5862	9796	Bone_Marrow	Bone_Marrow	11.24057824	61.78189902	TRUE	TRUE
CHS.1133.7	CHS.1133.14	AK2	184	239	0.7699	90.6	89.7	1.01	11	9796	Blood	Bone_Marrow	1.785398	61.78189902	TRUE	TRUE
CHS.11333.11	CHS.11333.2	DDX11	831	906	0.9172	78.9	80.6	0.9789	7	8589	Blood_Vessel	Bone_Marrow	2.286725	23.06776178	FALSE	FALSE
CHS.11333.3	CHS.11333.2	DDX11	970	906	1.0706	72.4	80.6	0.8983	6702	8589	Uterus	Bone_Marrow	3.285045921	23.06776178	FALSE	FALSE
CHS.11333.4	CHS.11333.2	DDX11	856	906	0.9448	79	80.6	0.9801	6696	8589	Uterus	Bone_Marrow	3.219114716	23.06776178	FALSE	FALSE
CHS.11333.5	CHS.11333.2	DDX11	970	906	1.0706	72.4	80.6	0.8983	6702	8589	Uterus	Bone_Marrow	3.285045921	23.06776178	FALSE	FALSE
CHS.11333.59	CHS.11333.2	DDX11	609	906	0.6722	84.6	80.6	1.0496	1406	8589	Prostate	Bone_Marrow	14.39146328	23.06776178	FALSE	FALSE
CHS.11333.6	CHS.11333.2	DDX11	880	906	0.9713	81.5	80.6	1.0112	5340	8589	Bone_Marrow	Bone_Marrow	1.622822657	23.06776178	FALSE	FALSE
CHS.11335.5	CHS.11335.11	SINHCAF	221	221	1	69.8	69.8	1	1462	8807	Uterus	Bone_Marrow	3.072400729	47.11749118	FALSE	TRUE
CHS.11335.8	CHS.11335.11	SINHCAF	221	221	1	69.8	69.8	1	5118	8807	Bone_Marrow	Bone_Marrow	21.90777157	47.11749118	TRUE	TRUE
CHS.11339.18	CHS.11339.4	DENND5B	738	1274	0.5793	76.5	76.9	0.9948	144	3806	Adipose_Tissue	Ovary	2.662278727	12.69500854	TRUE	TRUE
CHS.11339.23	CHS.11339.4	DENND5B	994	1274	0.7802	76.2	76.9	0.9909	53	3806	Fallopian_Tube	Ovary	3.89217	12.69500854	TRUE	TRUE
CHS.11339.25	CHS.11339.4	DENND5B	716	1274	0.562	78.2	76.9	1.0169	202	3806	Vagina	Ovary	4.383005	12.69500854	TRUE	TRUE
CHS.11339.28	CHS.11339.4	DENND5B	607	1274	0.4765	72.9	76.9	0.948	716	3806	Cervix_Uteri	Ovary	2.98557	12.69500854	TRUE	TRUE
CHS.11339.29	CHS.11339.4	DENND5B	585	1274	0.4592	74.6	76.9	0.9701	959	3806	Uterus	Ovary	4.387886478	12.69500854	TRUE	TRUE
CHS.11339.30	CHS.11339.4	DENND5B	408	1274	0.3203	64.1	76.9	0.8336	54	3806	Lung	Ovary	1.544039	12.69500854	TRUE	TRUE
CHS.11342.1	CHS.11342.5	ETFBKMT	262	262	1	85.7	85.7	1	6469	6469	Testis	Testis	3.133224338	3.133224338	FALSE	FALSE
CHS.11342.13	CHS.11342.5	ETFBKMT	175	262	0.6679	71.9	85.7	0.839	126	6469	Vagina	Testis	1.81054	3.133224338	FALSE	FALSE
CHS.11342.2	CHS.11342.5	ETFBKMT	262	262	1	85.7	85.7	1	6469	6469	Testis	Testis	3.133224338	3.133224338	FALSE	FALSE
CHS.11343.1	CHS.11343.3	AMN1	240	258	0.9302	91.5	91	1.0055	3693	9490	Testis	Testis	14.5866698	19.19572135	FALSE	FALSE
CHS.11343.10	CHS.11343.3	AMN1	209	258	0.8101	92.2	91	1.0132	1275	9490	Liver	Testis	2.0841052	19.19572135	FALSE	FALSE
CHS.11343.17	CHS.11343.3	AMN1	89	258	0.345	57	91	0.6264	1387	9490	Bone_Marrow	Testis	3.970474563	19.19572135	FALSE	FALSE
CHS.11343.2	CHS.11343.3	AMN1	58	258	0.2248	74.8	91	0.822	8188	9490	Brain	Testis	8.679776893	19.19572135	FALSE	FALSE
CHS.11343.5	CHS.11343.3	AMN1	240	258	0.9302	91.5	91	1.0055	3693	9490	Testis	Testis	14.5866698	19.19572135	FALSE	FALSE
CHS.1136.1	CHS.1136.3	AZIN2	402	460	0.8739	76.9	83.4	0.9221	81	4725	Esophagus	Testis	2.0349925	11.94574627	TRUE	FALSE
CHS.1136.11	CHS.1136.3	AZIN2	365	460	0.7935	81.7	83.4	0.9796	4448	4725	Testis	Testis	3.400770598	11.94574627	TRUE	FALSE
CHS.1136.12	CHS.1136.3	AZIN2	365	460	0.7935	81.7	83.4	0.9796	4448	4725	Testis	Testis	3.400770598	11.94574627	TRUE	FALSE
CHS.1136.13	CHS.1136.3	AZIN2	357	460	0.7761	79.1	83.4	0.9484	5	4725	Esophagus	Testis	3.04655	11.94574627	FALSE	FALSE
CHS.1136.15	CHS.1136.3	AZIN2	365	460	0.7935	81.7	83.4	0.9796	4448	4725	Testis	Testis	3.400770598	11.94574627	FALSE	FALSE
CHS.1136.21	CHS.1136.3	AZIN2	365	460	0.7935	81.7	83.4	0.9796	4448	4725	Testis	Testis	3.400770598	11.94574627	TRUE	FALSE
CHS.1136.25	CHS.1136.3	AZIN2	230	460	0.5	68.6	83.4	0.8225	0	4725	-	Testis	0	11.94574627	FALSE	FALSE
CHS.1136.26	CHS.1136.3	AZIN2	365	460	0.7935	81.7	83.4	0.9796	4448	4725	Testis	Testis	3.400770598	11.94574627	TRUE	FALSE
CHS.1136.27	CHS.1136.3	AZIN2	267	460	0.5804	84.8	83.4	1.0168	2	4725	Heart	Testis	0.883439	11.94574627	FALSE	FALSE
CHS.1136.28	CHS.1136.3	AZIN2	365	460	0.7935	81.7	83.4	0.9796	4448	4725	Testis	Testis	3.400770598	11.94574627	FALSE	FALSE
CHS.1136.30	CHS.1136.3	AZIN2	392	460	0.8522	86.3	83.4	1.0348	148	4725	Testis	Testis	2.8988	11.94574627	FALSE	FALSE
CHS.1136.31	CHS.1136.3	AZIN2	211	460	0.4587	81.7	83.4	0.9796	17	4725	Thyroid	Testis	2.5215525	11.94574627	FALSE	FALSE
CHS.1136.32	CHS.1136.3	AZIN2	362	460	0.787	83.7	83.4	1.0036	35	4725	Breast	Testis	2.71838	11.94574627	FALSE	FALSE
CHS.1136.34	CHS.1136.3	AZIN2	480	460	1.0435	82	83.4	0.9832	277	4725	Testis	Testis	23.97245198	11.94574627	FALSE	FALSE
CHS.1136.39	CHS.1136.3	AZIN2	415	460	0.9022	85.9	83.4	1.03	9	4725	Esophagus	Testis	1.72109	11.94574627	FALSE	FALSE
CHS.1136.4	CHS.1136.3	AZIN2	460	460	1	83.4	83.4	1	4725	4725	Testis	Testis	11.94574627	11.94574627	FALSE	FALSE
CHS.1136.46	CHS.1136.3	AZIN2	460	460	1	83.4	83.4	1	4725	4725	Testis	Testis	11.94574627	11.94574627	TRUE	FALSE
CHS.1136.49	CHS.1136.3	AZIN2	309	460	0.6717	79.7	83.4	0.9556	192	4725	Nerve	Testis	3.487918	11.94574627	TRUE	FALSE
CHS.1136.5	CHS.1136.3	AZIN2	365	460	0.7935	81.7	83.4	0.9796	4448	4725	Testis	Testis	3.400770598	11.94574627	TRUE	FALSE
CHS.1136.50	CHS.1136.3	AZIN2	365	460	0.7935	81.7	83.4	0.9796	4448	4725	Testis	Testis	3.400770598	11.94574627	FALSE	FALSE
CHS.1136.6	CHS.1136.3	AZIN2	365	460	0.7935	81.7	83.4	0.9796	4448	4725	Testis	Testis	3.400770598	11.94574627	FALSE	FALSE
CHS.1136.9	CHS.1136.3	AZIN2	460	460	1	83.4	83.4	1	4725	4725	Testis	Testis	11.94574627	11.94574627	TRUE	FALSE
CHS.11361.1	CHS.11361.18	BICD1	873	975	0.8954	74.9	68.8	1.0887	724	2447	Fallopian_Tube	Ovary	4.18577	4.361693525	TRUE	TRUE
CHS.11361.11	CHS.11361.18	BICD1	877	975	0.8995	75	68.8	1.0901	194	2447	Spleen	Ovary	2.321928	4.361693525	TRUE	TRUE
CHS.11361.19	CHS.11361.18	BICD1	835	975	0.8564	76.6	68.8	1.1134	3998	2447	Brain	Ovary	4.957017267	4.361693525	TRUE	TRUE
CHS.11361.2	CHS.11361.18	BICD1	717	975	0.7354	77.2	68.8	1.1221	2139	2447	Bone_Marrow	Ovary	2.474885132	4.361693525	FALSE	TRUE
CHS.11361.3	CHS.11361.18	BICD1	937	975	0.961	70.6	68.8	1.0262	24	2447	Skin	Ovary	2.26448475	4.361693525	TRUE	TRUE
CHS.11361.4	CHS.11361.18	BICD1	827	975	0.8482	77.1	68.8	1.1206	2742	2447	Brain	Ovary	4.324051764	4.361693525	TRUE	TRUE
CHS.11361.6	CHS.11361.18	BICD1	821	975	0.8421	77.4	68.8	1.125	1030	2447	Ovary	Ovary	2.181987955	4.361693525	TRUE	TRUE
CHS.11361.7	CHS.11361.18	BICD1	827	975	0.8482	77.1	68.8	1.1206	2742	2447	Brain	Ovary	4.324051764	4.361693525	TRUE	TRUE
CHS.11361.8	CHS.11361.18	BICD1	978	975	1.0031	68.9	68.8	1.0015	2	2447	Brain	Ovary	2.13817	4.361693525	TRUE	TRUE
CHS.11363.10	CHS.11363.2	FGD4	673	903	0.7453	74.3	60.7	1.2241	3011	5459	Cervix_Uteri	Ovary	4.7821	9.023784928	FALSE	FALSE
CHS.11363.11	CHS.11363.2	FGD4	207	903	0.2292	49.8	60.7	0.8204	55	5459	Thyroid	Ovary	2.81697	9.023784928	FALSE	FALSE
CHS.11363.12	CHS.11363.2	FGD4	471	903	0.5216	77.6	60.7	1.2784	274	5459	Testis	Ovary	1.176468361	9.023784928	FALSE	FALSE
CHS.11363.13	CHS.11363.2	FGD4	422	903	0.4673	82.8	60.7	1.3641	219	5459	Testis	Ovary	2.340024163	9.023784928	FALSE	FALSE
CHS.11363.14	CHS.11363.2	FGD4	766	903	0.8483	65.9	60.7	1.0857	5338	5459	Ovary	Ovary	6.873914241	9.023784928	TRUE	FALSE
CHS.11363.18	CHS.11363.2	FGD4	750	903	0.8306	66.2	60.7	1.0906	28	5459	Adipose_Tissue	Ovary	2.51823	9.023784928	TRUE	FALSE
CHS.11363.20	CHS.11363.2	FGD4	582	903	0.6445	81.5	60.7	1.3427	14	5459	Nerve	Ovary	2.65616	9.023784928	FALSE	FALSE
CHS.11363.22	CHS.11363.2	FGD4	673	903	0.7453	74.3	60.7	1.2241	3011	5459	Cervix_Uteri	Ovary	4.7821	9.023784928	TRUE	FALSE
CHS.11363.23	CHS.11363.2	FGD4	766	903	0.8483	65.9	60.7	1.0857	5338	5459	Ovary	Ovary	6.873914241	9.023784928	FALSE	FALSE
CHS.11363.3	CHS.11363.2	FGD4	887	903	0.9823	61.9	60.7	1.0198	31	5459	Testis	Ovary	6.35405	9.023784928	FALSE	FALSE
CHS.11363.43	CHS.11363.2	FGD4	207	903	0.2292	49.8	60.7	0.8204	55	5459	Thyroid	Ovary	2.81697	9.023784928	TRUE	FALSE
CHS.11363.44	CHS.11363.2	FGD4	750	903	0.8306	66.2	60.7	1.0906	28	5459	Adipose_Tissue	Ovary	2.51823	9.023784928	FALSE	FALSE
CHS.11363.6	CHS.11363.2	FGD4	673	903	0.7453	74.3	60.7	1.2241	765	5459	Prostate	Ovary	4.454126667	9.023784928	FALSE	FALSE
CHS.11363.8	CHS.11363.2	FGD4	673	903	0.7453	74.3	60.7	1.2241	3011	5459	Cervix_Uteri	Ovary	4.7821	9.023784928	TRUE	FALSE
CHS.11363.9	CHS.11363.2	FGD4	851	903	0.9424	63.1	60.7	1.0395	2353	5459	Blood	Ovary	4.61550443	9.023784928	FALSE	FALSE
CHS.11364.14	CHS.11364.2	DNM1L	723	749	0.9653	78	76.4	1.0209	48	3805	Brain	Brain	2.118894854	13.33021519	TRUE	TRUE
CHS.11364.15	CHS.11364.2	DNM1L	712	749	0.9506	78.5	76.4	1.0275	3829	3805	Brain	Brain	2.840134004	13.33021519	TRUE	TRUE
CHS.11364.3	CHS.11364.2	DNM1L	738	749	0.9853	77.3	76.4	1.0118	3811	3805	Brain	Brain	11.03088726	13.33021519	TRUE	TRUE
CHS.11364.4	CHS.11364.2	DNM1L	533	749	0.7116	70.9	76.4	0.928	1292	3805	Brain	Brain	0.118382242	13.33021519	TRUE	TRUE
CHS.11364.5	CHS.11364.2	DNM1L	736	749	0.9826	77.2	76.4	1.0105	9417	3805	Bladder	Brain	16.89728545	13.33021519	TRUE	TRUE
CHS.11364.51	CHS.11364.2	DNM1L	616	749	0.8224	79.5	76.4	1.0406	115	3805	Pituitary	Brain	5.679585556	13.33021519	TRUE	TRUE
CHS.11364.52	CHS.11364.2	DNM1L	537	749	0.717	85.2	76.4	1.1152	10	3805	Prostate	Brain	3.088095	13.33021519	TRUE	TRUE
CHS.11364.6	CHS.11364.2	DNM1L	725	749	0.968	78.1	76.4	1.0223	9256	3805	Bladder	Brain	8.563372727	13.33021519	TRUE	TRUE
CHS.11364.7	CHS.11364.2	DNM1L	710	749	0.9479	79	76.4	1.034	9547	3805	Bone_Marrow	Brain	17.64357745	13.33021519	TRUE	TRUE
CHS.11364.8	CHS.11364.2	DNM1L	699	749	0.9332	79.6	76.4	1.0419	9478	3805	Muscle	Brain	12.81859954	13.33021519	TRUE	TRUE
CHS.11365.1	CHS.11365.15	YARS2	477	477	1	86.8	86.8	1	2495	9750	Bone_Marrow	Bone_Marrow	4.037987756	10.16284829	FALSE	TRUE
CHS.11367.5	CHS.11367.4	PKP2	881	837	1.0526	62.4	64.1	0.9735	481	5284	Fallopian_Tube	Heart	9.53217	73.16673296	TRUE	TRUE
CHS.11370.4	CHS.11370.1	SYT10	183	523	0.3499	35.2	69.7	0.505	220	361	Bone_Marrow	Fallopian_Tube	4.373831919	2.496256	TRUE	TRUE
CHS.11370.7	CHS.11370.1	SYT10	342	523	0.6539	80.3	69.7	1.1521	348	361	Nerve	Fallopian_Tube	3.347001446	2.496256	TRUE	TRUE
CHS.1138.1	CHS.1138.4	TRIM62	555	475	1.1684	80.2	87.4	0.9176	675	9358	Lung	Skin	1.708093118	11.72285551	TRUE	TRUE
CHS.1138.2	CHS.1138.4	TRIM62	354	475	0.7453	92.3	87.4	1.0561	1629	9358	Skin	Skin	0.662528755	11.72285551	TRUE	TRUE
CHS.11383.3	CHS.11383.2	ALG10B	126	473	0.2664	87.9	91.8	0.9575	2797	6464	Prostate	Fallopian_Tube	1.514212	3.101281667	TRUE	TRUE
CHS.11385.15	CHS.11385.3	CPNE8	398	564	0.7057	87	87.3	0.9966	42	7871	Prostate	Adipose_Tissue	2.47432	15.50649582	FALSE	TRUE
CHS.11385.25	CHS.11385.3	CPNE8	241	564	0.4273	88.1	87.3	1.0092	1925	7871	Adipose_Tissue	Adipose_Tissue	2.774698968	15.50649582	FALSE	TRUE
CHS.11385.6	CHS.11385.3	CPNE8	406	564	0.7199	85.7	87.3	0.9817	416	7871	Lung	Adipose_Tissue	2.387083667	15.50649582	TRUE	TRUE
CHS.11390.57	CHS.11390.10	KIF21A	945	1674	0.5645	72.2	71	1.0169	2	2059	Brain	Brain	1.52384	5.139129458	TRUE	TRUE
CHS.11392.1	CHS.11392.6	ABCD2	674	740	0.9108	81.7	80.5	1.0149	39	2464	Adipose_Tissue	Adipose_Tissue	1.656303	6.541152577	FALSE	FALSE
CHS.11392.3	CHS.11392.6	ABCD2	556	740	0.7514	79.7	80.5	0.9901	103	2464	Brain	Adipose_Tissue	2.6158692	6.541152577	FALSE	FALSE
CHS.11392.4	CHS.11392.6	ABCD2	502	740	0.6784	78	80.5	0.9689	281	2464	Brain	Adipose_Tissue	3.68918733	6.541152577	FALSE	FALSE
CHS.11392.8	CHS.11392.6	ABCD2	556	740	0.7514	78.9	80.5	0.9801	7	2464	Breast	Adipose_Tissue	1.00163	6.541152577	FALSE	FALSE
CHS.11394.1	CHS.11394.2	C12orf40	477	652	0.7316	44.1	38.4	1.1484	293	222	Bone_Marrow	Testis	3.093446545	4.110142199	TRUE	TRUE
CHS.11394.3	CHS.11394.2	C12orf40	394	652	0.6043	42.3	38.4	1.1016	0	222	-	Testis	0	4.110142199	FALSE	TRUE
CHS.11394.4	CHS.11394.2	C12orf40	575	652	0.8819	34.8	38.4	0.9062	117	222	Bone_Marrow	Testis	5.7512525	4.110142199	TRUE	TRUE
CHS.11395.11	CHS.11395.2	SLC2A13	483	648	0.7454	78.5	80.6	0.9739	2	5906	Small_Intestine	Brain	1.55966	13.80664323	TRUE	TRUE
CHS.11395.14	CHS.11395.2	SLC2A13	445	648	0.6867	77.5	80.6	0.9615	20	5906	Lung	Brain	3.43329	13.80664323	TRUE	TRUE
CHS.11395.15	CHS.11395.2	SLC2A13	451	648	0.696	77.1	80.6	0.9566	52	5906	Nerve	Brain	2.28182	13.80664323	TRUE	TRUE
CHS.11395.18	CHS.11395.2	SLC2A13	528	648	0.8148	72.8	80.6	0.9032	292	5906	Small_Intestine	Brain	2.39743	13.80664323	TRUE	TRUE
CHS.11395.4	CHS.11395.2	SLC2A13	606	648	0.9352	76.8	80.6	0.9529	119	5906	Brain	Brain	2.242709795	13.80664323	TRUE	TRUE
CHS.11395.5	CHS.11395.2	SLC2A13	515	648	0.7948	69.5	80.6	0.8623	948	5906	Cervix_Uteri	Brain	2.7349886	13.80664323	FALSE	TRUE
CHS.114.4	CHS.114.7	CDK11B	772	782	0.9872	64.9	63.6	1.0204	306	9780	Bone_Marrow	Bone_Marrow	6.2084772	20.22254218	TRUE	TRUE
CHS.114.5	CHS.114.7	CDK11B	526	782	0.6726	64.7	63.6	1.0173	8338	9780	Bone_Marrow	Bone_Marrow	0.459595732	20.22254218	TRUE	TRUE
CHS.114.6	CHS.114.7	CDK11B	565	782	0.7225	63.4	63.6	0.9969	9751	9780	Bone_Marrow	Bone_Marrow	9.761363168	20.22254218	TRUE	TRUE
CHS.114.8	CHS.114.7	CDK11B	795	782	1.0166	62.7	63.6	0.9858	9571	9780	Bone_Marrow	Bone_Marrow	6.70186483	20.22254218	TRUE	TRUE
CHS.114.9	CHS.114.7	CDK11B	748	782	0.9565	63.3	63.6	0.9953	9661	9780	Muscle	Bone_Marrow	18.66451643	20.22254218	TRUE	TRUE
CHS.11401.28	CHS.11401.10	LRRK2	825	2527	0.3265	86	77.5	1.1097	2	4854	Brain	Lung	0.6853155	38.41558314	TRUE	TRUE
CHS.11405.20	CHS.11405.9	CNTN1	627	1018	0.6159	89.3	87.3	1.0229	3651	4419	Brain	Brain	9.459046704	47.78572724	TRUE	TRUE
CHS.11405.8	CHS.11405.9	CNTN1	627	1018	0.6159	89.3	87.3	1.0229	3651	4419	Brain	Brain	9.459046704	47.78572724	TRUE	TRUE
CHS.11407.4	CHS.11407.2	PDZRN4	778	1036	0.751	53.8	59.5	0.9042	1264	4105	Brain	Nerve	1.21807547	35.98638803	FALSE	FALSE
CHS.11414.2	CHS.11414.3	GXYLT1	409	440	0.9295	85.7	83.3	1.0288	4520	2833	Nerve	Testis	4.773356625	6.709059497	TRUE	TRUE
CHS.11414.6	CHS.11414.3	GXYLT1	325	440	0.7386	94.1	83.3	1.1297	593	2833	Pituitary	Testis	3.476010556	6.709059497	FALSE	TRUE
CHS.11416.10	CHS.11416.7	YAF2	96	180	0.5333	68.1	64.9	1.0493	102	9728	Spleen	Muscle	1.484305	10.07592101	FALSE	TRUE
CHS.11416.11	CHS.11416.7	YAF2	120	180	0.6667	62.6	64.9	0.9646	135	9728	Brain	Muscle	5.59703	10.07592101	FALSE	TRUE
CHS.11416.12	CHS.11416.7	YAF2	86	180	0.4778	64.8	64.9	0.9985	2001	9728	Bladder	Muscle	1.637035	10.07592101	TRUE	TRUE
CHS.11416.38	CHS.11416.7	YAF2	117	180	0.65	63.8	64.9	0.9831	6299	9728	Bone_Marrow	Muscle	0.525906022	10.07592101	TRUE	TRUE
CHS.11416.6	CHS.11416.7	YAF2	138	180	0.7667	63.5	64.9	0.9784	5582	9728	Thyroid	Muscle	0.277472523	10.07592101	TRUE	TRUE
CHS.11416.8	CHS.11416.7	YAF2	171	180	0.95	59.9	64.9	0.923	5628	9728	Nerve	Muscle	1.671867354	10.07592101	TRUE	TRUE
CHS.11416.9	CHS.11416.7	YAF2	204	180	1.1333	62.2	64.9	0.9584	6952	9728	Cervix_Uteri	Muscle	2.131743444	10.07592101	TRUE	TRUE
CHS.11417.10	CHS.11417.14	PPHLN1	258	367	0.703	53.1	55.6	0.955	9572	9720	Lung	Bone_Marrow	0.333238957	18.0153801	TRUE	TRUE
CHS.11417.11	CHS.11417.14	PPHLN1	374	367	1.0191	55.4	55.6	0.9964	9597	9720	Bone_Marrow	Bone_Marrow	13.0187449	18.0153801	TRUE	TRUE
CHS.11417.12	CHS.11417.14	PPHLN1	319	367	0.8692	58.5	55.6	1.0522	9622	9720	Bone_Marrow	Bone_Marrow	6.075625412	18.0153801	TRUE	TRUE
CHS.11417.13	CHS.11417.14	PPHLN1	300	367	0.8174	59.3	55.6	1.0665	380	9720	Bladder	Bone_Marrow	2.29142	18.0153801	TRUE	TRUE
CHS.11417.15	CHS.11417.14	PPHLN1	348	367	0.9482	56.7	55.6	1.0198	9513	9720	Testis	Bone_Marrow	10.5953571	18.0153801	TRUE	TRUE
CHS.11417.16	CHS.11417.14	PPHLN1	293	367	0.7984	58.8	55.6	1.0576	1713	9720	Testis	Bone_Marrow	6.670649474	18.0153801	TRUE	TRUE
CHS.11417.19	CHS.11417.14	PPHLN1	458	367	1.248	53.7	55.6	0.9658	1094	9720	Pituitary	Bone_Marrow	0.915897167	18.0153801	TRUE	TRUE
CHS.11417.20	CHS.11417.14	PPHLN1	434	367	1.1826	54.4	55.6	0.9784	7780	9720	Bone_Marrow	Bone_Marrow	6.47423036	18.0153801	TRUE	TRUE
CHS.11417.21	CHS.11417.14	PPHLN1	422	367	1.1499	54.2	55.6	0.9748	1	9720	Colon	Bone_Marrow	0.886104	18.0153801	TRUE	TRUE
CHS.11417.25	CHS.11417.14	PPHLN1	441	367	1.2016	54	55.6	0.9712	7740	9720	Bone_Marrow	Bone_Marrow	1.99241614	18.0153801	TRUE	TRUE
CHS.11417.26	CHS.11417.14	PPHLN1	355	367	0.9673	56.9	55.6	1.0234	9401	9720	Testis	Bone_Marrow	0.868169536	18.0153801	TRUE	TRUE
CHS.11417.40	CHS.11417.14	PPHLN1	470	367	1.2807	53.1	55.6	0.955	7	9720	Testis	Bone_Marrow	2.012861667	18.0153801	TRUE	TRUE
CHS.11417.47	CHS.11417.14	PPHLN1	361	367	0.9837	51.5	55.6	0.9263	2697	9720	Cervix_Uteri	Bone_Marrow	7.93726	18.0153801	FALSE	TRUE
CHS.11417.5	CHS.11417.14	PPHLN1	415	367	1.1308	55.1	55.6	0.991	11	9720	Brain	Bone_Marrow	2.733656667	18.0153801	TRUE	TRUE
CHS.11417.52	CHS.11417.14	PPHLN1	232	367	0.6322	53.4	55.6	0.9604	10	9720	Testis	Bone_Marrow	2.0518	18.0153801	TRUE	TRUE
CHS.11417.53	CHS.11417.14	PPHLN1	306	367	0.8338	51.1	55.6	0.9191	2	9720	Heart	Bone_Marrow	0.775473	18.0153801	TRUE	TRUE
CHS.11417.54	CHS.11417.14	PPHLN1	287	367	0.782	51.9	55.6	0.9335	1	9720	Lung	Bone_Marrow	3.226	18.0153801	TRUE	TRUE
CHS.11417.55	CHS.11417.14	PPHLN1	312	367	0.8501	58.8	55.6	1.0576	8152	9720	Blood_Vessel	Bone_Marrow	11.0106571	18.0153801	TRUE	TRUE
CHS.11417.56	CHS.11417.14	PPHLN1	428	367	1.1662	55.6	55.6	1	3331	9720	Spleen	Bone_Marrow	4.755940889	18.0153801	FALSE	TRUE
CHS.11417.6	CHS.11417.14	PPHLN1	409	367	1.1144	55.7	55.6	1.0018	411	9720	Salivary_Gland	Bone_Marrow	5.99293	18.0153801	TRUE	TRUE
CHS.11417.64	CHS.11417.14	PPHLN1	355	367	0.9673	56.9	55.6	1.0234	9401	9720	Testis	Bone_Marrow	0.868169536	18.0153801	FALSE	TRUE
CHS.11417.66	CHS.11417.14	PPHLN1	363	367	0.9891	58.2	55.6	1.0468	0	9720	-	Bone_Marrow	0	18.0153801	FALSE	TRUE
CHS.11419.3	CHS.11419.2	ZCRB1	228	217	1.0507	73.3	72.9	1.0055	2	9780	Small_Intestine	Testis	0.901582	76.44805024	TRUE	TRUE
CHS.11419.7	CHS.11419.2	ZCRB1	176	217	0.8111	72.5	72.9	0.9945	892	9780	Testis	Testis	1.742278702	76.44805024	TRUE	TRUE
CHS.1142.1	CHS.1142.7	ZNF362	407	420	0.969	55.2	54	1.0222	7135	9198	Blood_Vessel	Nerve	16.13197441	7.442835581	TRUE	TRUE
CHS.1142.14	CHS.1142.7	ZNF362	420	420	1	54	54	1	9198	9198	Nerve	Nerve	7.442835581	7.442835581	TRUE	TRUE
CHS.1142.15	CHS.1142.7	ZNF362	407	420	0.969	55.2	54	1.0222	7135	9198	Blood_Vessel	Nerve	16.13197441	7.442835581	FALSE	TRUE
CHS.11420.1	CHS.11420.8	PRICKLE1	831	831	1	54.2	54.2	1	4491	6331	Thyroid	Nerve	3.079558185	23.6036654	FALSE	TRUE
CHS.11420.14	CHS.11420.8	PRICKLE1	831	831	1	54.2	54.2	1	4491	6331	Thyroid	Nerve	3.079558185	23.6036654	FALSE	TRUE
CHS.11420.16	CHS.11420.8	PRICKLE1	831	831	1	54.2	54.2	1	4491	6331	Thyroid	Nerve	3.079558185	23.6036654	TRUE	TRUE
CHS.11420.27	CHS.11420.8	PRICKLE1	831	831	1	54.2	54.2	1	4491	6331	Thyroid	Nerve	3.079558185	23.6036654	FALSE	TRUE
CHS.11420.5	CHS.11420.8	PRICKLE1	831	831	1	54.2	54.2	1	4491	6331	Thyroid	Nerve	3.079558185	23.6036654	FALSE	TRUE
CHS.11420.6	CHS.11420.8	PRICKLE1	831	831	1	54.2	54.2	1	4491	6331	Thyroid	Nerve	3.079558185	23.6036654	FALSE	TRUE
CHS.11420.7	CHS.11420.8	PRICKLE1	831	831	1	54.2	54.2	1	4491	6331	Thyroid	Nerve	3.079558185	23.6036654	TRUE	TRUE
CHS.11428.11	CHS.11428.10	PUS7L	701	701	1	75.8	75.8	1	3353	4430	Bone_Marrow	Bone_Marrow	2.438196292	5.709290707	TRUE	TRUE
CHS.11428.12	CHS.11428.10	PUS7L	701	701	1	75.8	75.8	1	3353	4430	Bone_Marrow	Bone_Marrow	2.438196292	5.709290707	FALSE	TRUE
CHS.11428.13	CHS.11428.10	PUS7L	388	701	0.5535	89.2	75.8	1.1768	852	4430	Prostate	Bone_Marrow	0.911793625	5.709290707	TRUE	TRUE
CHS.11428.21	CHS.11428.10	PUS7L	617	701	0.8802	72.3	75.8	0.9538	338	4430	Fallopian_Tube	Bone_Marrow	4.63015	5.709290707	FALSE	TRUE
CHS.11428.26	CHS.11428.10	PUS7L	608	701	0.8673	73.3	75.8	0.967	98	4430	Uterus	Bone_Marrow	3.12921	5.709290707	TRUE	TRUE
CHS.11428.27	CHS.11428.10	PUS7L	629	701	0.8973	70.5	75.8	0.9301	426	4430	Uterus	Bone_Marrow	2.709273526	5.709290707	TRUE	TRUE
CHS.11428.4	CHS.11428.10	PUS7L	668	701	0.9529	71.7	75.8	0.9459	30	4430	Adrenal_Gland	Bone_Marrow	1.91228	5.709290707	TRUE	TRUE
CHS.11429.10	CHS.11429.5	IRAK4	336	460	0.7304	85.3	83.1	1.0265	8031	7037	Thyroid	Bone_Marrow	3.283003266	4.492822733	FALSE	FALSE
CHS.11429.11	CHS.11429.5	IRAK4	336	460	0.7304	85.3	83.1	1.0265	8031	7037	Thyroid	Bone_Marrow	3.283003266	4.492822733	FALSE	FALSE
CHS.11429.12	CHS.11429.5	IRAK4	336	460	0.7304	85.3	83.1	1.0265	8031	7037	Thyroid	Bone_Marrow	3.283003266	4.492822733	FALSE	FALSE
CHS.11429.15	CHS.11429.5	IRAK4	257	460	0.5587	89.5	83.1	1.077	295	7037	Small_Intestine	Bone_Marrow	3.030153333	4.492822733	FALSE	FALSE
CHS.11429.17	CHS.11429.5	IRAK4	336	460	0.7304	85.3	83.1	1.0265	8031	7037	Thyroid	Bone_Marrow	3.283003266	4.492822733	FALSE	FALSE
CHS.11429.18	CHS.11429.5	IRAK4	460	460	1	83.1	83.1	1	5677	7037	Spleen	Bone_Marrow	4.525167296	4.492822733	FALSE	FALSE
CHS.11429.3	CHS.11429.5	IRAK4	460	460	1	83.1	83.1	1	5677	7037	Spleen	Bone_Marrow	4.525167296	4.492822733	FALSE	FALSE
CHS.11429.4	CHS.11429.5	IRAK4	336	460	0.7304	85.3	83.1	1.0265	8031	7037	Thyroid	Bone_Marrow	3.283003266	4.492822733	FALSE	FALSE
CHS.11429.49	CHS.11429.5	IRAK4	336	460	0.7304	85.3	83.1	1.0265	8031	7037	Thyroid	Bone_Marrow	3.283003266	4.492822733	FALSE	FALSE
CHS.11429.6	CHS.11429.5	IRAK4	336	460	0.7304	85.3	83.1	1.0265	8031	7037	Thyroid	Bone_Marrow	3.283003266	4.492822733	FALSE	FALSE
CHS.11429.7	CHS.11429.5	IRAK4	336	460	0.7304	85.3	83.1	1.0265	8031	7037	Thyroid	Bone_Marrow	3.283003266	4.492822733	FALSE	FALSE
CHS.11429.8	CHS.11429.5	IRAK4	257	460	0.5587	89.5	83.1	1.077	295	7037	Small_Intestine	Bone_Marrow	3.030153333	4.492822733	FALSE	FALSE
CHS.1143.16	CHS.1143.25	PHC2	859	859	1	42.2	42.2	1	1778	1211	Testis	Bladder	31.47223811	44.3273	TRUE	TRUE
CHS.1143.18	CHS.1143.25	PHC2	859	859	1	42.2	42.2	1	1778	1211	Testis	Bladder	31.47223811	44.3273	FALSE	TRUE
[truncated: 61,756 more rows]
