# Supplementary material for: Structure-guided isoform identification for the human transcriptome
Source: eLife. 2022 Dec 15;11:e82556. doi: 10.7554/eLife.82556 (PMC9812405; doi:10.7554/eLife.82556)
Supplement: Supplementary file 3. — A filtered set of Comprehensive Human Expressed SequenceS (CHESS) transcripts compared to MANE according to the criteria detailed in the ‘Filtering MANE comparisons’ section of the Materials and methods. Uses the same column names as Supplementary file 2. [file elife-82556-supp3.csv]

CHESS_ID_isoform	CHESS_ID_MANE	gene	aa_length_isoform	aa_length_MANE	length_ratio	pLDDT_isoform	pLDDT_MANE	pLDDT_ratio	GTEx_samples_observed_isoform	GTEx_samples_observed_MANE	GTEx_top_tissue_name_isoform	GTEx_top_tissue_name_MANE	GTEx_top_tissue_TPM_isoform	GTEx_top_tissue_TPM_MANE	introns_conserved_in_mouse_isoform	introns_conserved_in_mouse_MANE
CHS.10000.2	CHS.10000.4	NCAM1	726	858	0.8462	87.5	81.5	1.0736	6098	5156	Brain	Uterus	35.07639669	26.98797844	TRUE	TRUE
CHS.10005.3	CHS.10005.4	DRD2	414	443	0.9345	73.4	68.8	1.0669	962	1200	Pituitary	Pituitary	19.53906379	62.4952715	FALSE	FALSE
CHS.10008.7	CHS.10008.9	TMPRSS5	413	457	0.9037	83.1	79	1.0519	1586	2006	Nerve	Nerve	5.699639743	25.0883269	FALSE	FALSE
CHS.10133.59	CHS.10133.10	PHLDB1	721	1377	0.5236	72.3	59	1.2254	8159	6998	Colon	Brain	2.297611188	11.17384773	TRUE	TRUE
CHS.10182.2	CHS.10182.8	USP2	396	605	0.6545	85.3	65.7	1.2983	7695	5407	Kidney	Testis	24.35970085	126.5194036	TRUE	TRUE
CHS.10323.13	CHS.10323.1	VSIG2	284	327	0.8685	87	80.7	1.0781	3791	3735	Stomach	Stomach	24.49932956	302.784334	TRUE	TRUE
CHS.10326.8	CHS.10326.13	MSANTD2	329	559	0.5886	76.2	63.9	1.1925	9695	7130	Thyroid	Thyroid	17.04206436	5.587767714	TRUE	TRUE
CHS.10376.18	CHS.10376.15	KIRREL3	600	778	0.7712	83.8	71.1	1.1786	2033	2011	Vagina	Brain	0.503324333	9.341066808	TRUE	TRUE
CHS.10627.2	CHS.10627.7	NINJ2	135	142	0.9507	76.4	68.2	1.1202	5889	6455	Blood	Brain	3.938788134	9.596567529	TRUE	TRUE
CHS.10627.5	CHS.10627.7	NINJ2	106	142	0.7465	75.5	68.2	1.107	8351	6455	Lung	Brain	19.15389674	9.596567529	TRUE	TRUE
CHS.10698.14	CHS.10698.9	CRACR2A	395	731	0.5404	74.9	68.6	1.0918	2335	1190	Salivary_Gland	Bladder	0.527197373	1.6036655	FALSE	FALSE
CHS.10701.7	CHS.10701.5	PARP11	257	338	0.7604	86	80.8	1.0644	6881	6571	Cervix_Uteri	Ovary	2.058210222	4.14304237	FALSE	TRUE
CHS.10725.50	CHS.10725.33	DYRK4	327	634	0.5158	73.3	67.8	1.0811	605	18	Prostate	Testis	17.17823133	5.891958889	FALSE	TRUE
CHS.10725.8	CHS.10725.33	DYRK4	520	634	0.8202	76.8	67.8	1.1327	232	18	Skin	Testis	3.85999	5.891958889	TRUE	TRUE
CHS.10747.36	CHS.10747.7	ANO2	599	998	0.6002	77.8	71	1.0958	86	27	Lung	Salivary_Gland	4.039836	8.5775	FALSE	TRUE
CHS.10747.4	CHS.10747.7	ANO2	546	998	0.5471	76.9	71	1.0831	96	27	Testis	Salivary_Gland	4.3923256	8.5775	FALSE	TRUE
CHS.10813.1	CHS.10813.18	TPI1	286	249	1.1486	87.5	87.5	1	9791	0	Bone_Marrow	-	726.1476373	0	TRUE	TRUE
CHS.10813.13	CHS.10813.18	TPI1	167	249	0.6707	94.9	87.5	1.0846	9529	0	Brain	-	11.80938911	0	TRUE	TRUE
CHS.10904.19	CHS.10904.14	KLRG1	110	189	0.582	93.3	82.1	1.1364	3632	3195	Spleen	Spleen	1.911098716	5.857566368	FALSE	TRUE
CHS.10959.9	CHS.10959.11	CLEC7A	201	247	0.8138	83	75.6	1.0979	6133	4401	Blood	Blood	15.85180664	8.904457426	TRUE	TRUE
CHS.11072.10	CHS.11072.1	GPRC5D	300	345	0.8696	79.1	73.8	1.0718	702	264	Lung	Skin	2.880903771	18.47353638	TRUE	TRUE
CHS.11074.3	CHS.11074.7	GSG1	326	362	0.9006	70.6	67.1	1.0522	422	218	Nerve	Testis	1.09067	98.48529363	FALSE	FALSE
CHS.11361.19	CHS.11361.18	BICD1	835	975	0.8564	76.6	68.8	1.1134	3998	2447	Brain	Ovary	4.957017267	4.361693525	TRUE	TRUE
CHS.11361.4	CHS.11361.18	BICD1	827	975	0.8482	77.1	68.8	1.1206	2742	2447	Brain	Ovary	4.324051764	4.361693525	TRUE	TRUE
CHS.11645.3	CHS.11645.1	ANKRD33	272	452	0.6018	80.9	63.9	1.266	16	14	Liver	Nerve	0.680254	1.16407425	FALSE	FALSE
CHS.11790.2	CHS.11790.1	HNRNPA1	320	372	0.8602	70	64.6	1.0836	9794	9790	Bone_Marrow	Ovary	710.9737347	472.3380982	FALSE	FALSE
CHS.11792.16	CHS.11792.15	COPZ1	160	177	0.904	91.9	87.2	1.0539	9760	9786	Bone_Marrow	Bone_Marrow	16.42621814	228.2152647	TRUE	TRUE
CHS.1184.11	CHS.1184.8	TFAP2E	271	442	0.6131	80.2	64.2	1.2492	2354	1355	Fallopian_Tube	Brain	5.1510625	7.114591897	TRUE	TRUE
CHS.11943.6	CHS.11943.8	ARHGAP9	420	731	0.5746	74.9	64.5	1.1612	5179	2523	Blood	Spleen	27.36134523	7.784525364	FALSE	FALSE
CHS.12119.5	CHS.12119.1	NUP107	896	925	0.9686	79.4	75.4	1.0531	83	9225	Testis	Bone_Marrow	1.90688	34.94811078	TRUE	TRUE
CHS.12155.2	CHS.12155.8	PTPRR	412	657	0.6271	78.3	68.8	1.1381	1360	834	Bladder	Skin	6.052133333	32.01	TRUE	TRUE
CHS.12176.68	CHS.12176.5	TBC1D15	649	674	0.9629	71.2	67.6	1.0533	0	9703	-	Adipose_Tissue	0	18.72666976	TRUE	TRUE
CHS.12203.25	CHS.12203.59	CAPS2	382	557	0.6858	83.9	75.3	1.1142	1280	27	Thyroid	Adrenal_Gland	3.733975348	2.76768	FALSE	FALSE
CHS.12203.55	CHS.12203.59	CAPS2	350	557	0.6284	80	75.3	1.0624	339	27	Fallopian_Tube	Adrenal_Gland	3.20385	2.76768	FALSE	FALSE
CHS.126.10	CHS.126.4	CALML6	156	181	0.8619	83.3	75.9	1.0975	2276	933	Muscle	Muscle	9.946773915	7.71427135	FALSE	FALSE
CHS.126.2	CHS.126.4	CALML6	164	181	0.9061	81.6	75.9	1.0751	722	933	Muscle	Muscle	3.69424488	7.71427135	FALSE	FALSE
CHS.126.9	CHS.126.4	CALML6	138	181	0.7624	83.3	75.9	1.0975	4022	933	Muscle	Muscle	3.009652889	7.71427135	FALSE	FALSE
CHS.12617.9	CHS.12617.1	TXNRD1	461	649	0.7103	96.5	89.3	1.0806	4547	906	Bladder	Testis	1.57756575	11.72160882	TRUE	TRUE
CHS.12653.10	CHS.12653.2	CKAP4	550	602	0.9136	77.1	73.4	1.0504	1073	9725	Skin	Skin	7.868374375	95.2645142	FALSE	TRUE
CHS.12808.20	CHS.12808.7	TPCN1	748	816	0.9167	85	80.2	1.0599	1708	9355	Brain	Thyroid	1.242860333	33.36136292	FALSE	TRUE
CHS.12956.10	CHS.12956.15	BICDL1	602	621	0.9694	76.9	73	1.0534	60	2866	Blood	Testis	2.49023	42.38057083	TRUE	TRUE
CHS.12956.14	CHS.12956.15	BICDL1	561	621	0.9034	78.7	73	1.0781	166	2866	Pituitary	Testis	22.32953333	42.38057083	TRUE	TRUE
CHS.12956.20	CHS.12956.15	BICDL1	588	621	0.9469	76.8	73	1.0521	1254	2866	Skin	Testis	105.109	42.38057083	TRUE	TRUE
CHS.12956.44	CHS.12956.15	BICDL1	584	621	0.9404	77.3	73	1.0589	94	2866	Pituitary	Testis	25.78633017	42.38057083	TRUE	TRUE
CHS.12956.56	CHS.12956.15	BICDL1	585	621	0.942	77.4	73	1.0603	11	2866	Pituitary	Testis	28.86925	42.38057083	TRUE	TRUE
CHS.12956.7	CHS.12956.15	BICDL1	562	621	0.905	78.7	73	1.0781	1	2866	Colon	Testis	0.407045	42.38057083	TRUE	TRUE
CHS.13007.6	CHS.13007.7	P2RX7	364	595	0.6118	87.2	82.6	1.0557	5711	5324	Lung	Nerve	4.385116355	9.031550305	TRUE	TRUE
CHS.13049.1	CHS.13049.24	DIABLO	186	239	0.7782	91.4	79.7	1.1468	9755	9735	Testis	Testis	17.56362937	88.3861	FALSE	FALSE
CHS.13090.1	CHS.13090.8	KMT5A	295	352	0.8381	70.2	63.4	1.1073	6333	3508	Bone_Marrow	Prostate	44.51181373	38.01433	FALSE	FALSE
CHS.13233.4	CHS.13233.12	GLT1D1	346	266	1.3008	94.3	85.3	1.1055	2857	2399	Blood	Blood	37.07106735	6.70953525	TRUE	TRUE
CHS.13233.7	CHS.13233.12	GLT1D1	324	266	1.218	89.7	85.3	1.0516	1	2399	Brain	Blood	1.34001	6.70953525	TRUE	TRUE
CHS.13233.8	CHS.13233.12	GLT1D1	362	266	1.3609	91.3	85.3	1.0703	396	2399	Muscle	Blood	3.768120525	6.70953525	TRUE	TRUE
CHS.13233.9	CHS.13233.12	GLT1D1	308	266	1.1579	92.2	85.3	1.0809	14	2399	Spleen	Blood	3.24559	6.70953525	TRUE	TRUE
CHS.13365.30	CHS.13365.5	CHFR	591	652	0.9064	72.4	68	1.0647	104	9466	Lung	Spleen	3.48387125	16.11232219	FALSE	FALSE
CHS.13365.40	CHS.13365.5	CHFR	592	652	0.908	71.6	68	1.0529	236	9466	Spleen	Spleen	3.18843225	16.11232219	FALSE	FALSE
CHS.13480.2	CHS.13480.14	PSPC1	393	523	0.7514	80.4	68.9	1.1669	9769	9762	Uterus	Testis	18.79722448	22.34906072	FALSE	TRUE
CHS.13529.17	CHS.13529.7	ZDHHC20	320	365	0.8767	91	83.4	1.0911	8183	7159	Nerve	Bladder	11.24672544	8.503178182	TRUE	TRUE
CHS.13577.7	CHS.13577.8	MIPEP	651	713	0.913	94.5	90	1.05	299	9028	Prostate	Skin	3.870079333	20.71796863	TRUE	TRUE
CHS.13667.16	CHS.13667.5	FLT1	687	1338	0.5135	84.6	72.7	1.1637	8286	7077	Thyroid	Thyroid	42.27523226	44.85230986	TRUE	TRUE
CHS.13726.11	CHS.13726.23	TEX26	158	289	0.5467	72.5	58.1	1.2478	655	641	Testis	Colon	17.5555946	30.2139	TRUE	TRUE
CHS.13738.2	CHS.13738.3	B3GLCT	449	498	0.9016	91.5	85.9	1.0652	14	5882	Skin	Uterus	3.01283	19.57597118	TRUE	TRUE
CHS.13802.5	CHS.13802.8	CCNA1	421	465	0.9054	71.9	66.1	1.0877	1395	2269	Testis	Testis	45.11937055	9.959196515	FALSE	FALSE
CHS.13809.5	CHS.13809.4	SMAD9	430	467	0.9208	83.8	79.6	1.0528	5002	5297	Thyroid	Thyroid	11.05317238	14.74249501	TRUE	FALSE
CHS.1381.27	CHS.1381.55	CCDC30	710	938	0.7569	75.6	71	1.0648	878	0	Thyroid	-	4.911205402	0	FALSE	FALSE
CHS.1381.29	CHS.1381.55	CCDC30	752	938	0.8017	75.4	71	1.062	8	0	Thyroid	-	2.498155	0	FALSE	FALSE
CHS.13823.29	CHS.13823.10	POSTN	778	836	0.9306	83.9	79.7	1.0527	96	5233	Lung	Blood	2.49309	14.99544667	TRUE	TRUE
CHS.13823.5	CHS.13823.10	POSTN	749	836	0.8959	87.4	79.7	1.0966	5577	5233	Blood_Vessel	Blood	2.283261746	14.99544667	TRUE	TRUE
CHS.13823.7	CHS.13823.10	POSTN	779	836	0.9318	84.9	79.7	1.0652	6681	5233	Blood_Vessel	Blood	24.89695911	14.99544667	TRUE	TRUE
CHS.13823.8	CHS.13823.10	POSTN	781	836	0.9342	84	79.7	1.054	6745	5233	Blood_Vessel	Blood	54.98428984	14.99544667	TRUE	TRUE
CHS.13825.7	CHS.13825.8	TRPC4	893	977	0.914	74.3	70	1.0614	1097	2145	Uterus	Uterus	0.588935764	8.441558021	TRUE	TRUE
CHS.14097.1	CHS.14097.4	FAM124A	301	546	0.5513	80.9	61.3	1.3197	6772	6088	Prostate	Spleen	1.12273737	9.323874655	TRUE	TRUE
CHS.14108.8	CHS.14108.10	DHRS12	317	268	1.1828	95.8	84.9	1.1284	9592	2935	Thyroid	Pituitary	17.43796863	5.327425717	FALSE	FALSE
CHS.14285.10	CHS.14285.14	PIBF1	688	757	0.9089	81.5	77.1	1.0571	13	9260	Thyroid	Thyroid	1.7319	17.34126437	TRUE	TRUE
CHS.14534.28	CHS.14534.12	MBNL2	288	391	0.7366	72	61.6	1.1688	217	50	Nerve	Brain	3.726060625	2.686301955	TRUE	TRUE
CHS.14638.1	CHS.14638.12	DAOA	82	153	0.5359	71.4	44.9	1.5902	0	0	-	-	0	0	FALSE	FALSE
CHS.14638.6	CHS.14638.12	DAOA	84	153	0.549	83.1	44.9	1.8508	0	0	-	-	0	0	FALSE	FALSE
CHS.14754.25	CHS.14754.59	ARHGEF7	646	862	0.7494	70.6	66	1.0697	9556	2789	Spleen	Prostate	20.47325819	20.60763647	FALSE	TRUE
CHS.14754.46	CHS.14754.59	ARHGEF7	547	862	0.6346	70.5	66	1.0682	3915	2789	Brain	Prostate	4.392711828	20.60763647	TRUE	TRUE
CHS.1479.29	CHS.1479.7	MUTYH	478	521	0.9175	84.8	80.2	1.0574	10	9580	Blood_Vessel	Nerve	3.695965	8.557000917	FALSE	TRUE
CHS.14920.5	CHS.14920.3	KLHL33	533	797	0.6688	87.8	82.6	1.063	872	439	Cervix_Uteri	Muscle	1.798675	11.87979037	TRUE	FALSE
CHS.14971.5	CHS.14971.31	RPGRIP1	928	1286	0.7216	70.7	67.1	1.0537	83	0	Testis	-	7.693386265	0	FALSE	FALSE
CHS.1498.3	CHS.1498.5	PIK3R3	417	461	0.9046	84.8	79.8	1.0627	318	8417	Spleen	Adipose_Tissue	11.8333	40.09594163	TRUE	TRUE
CHS.15049.13	CHS.15049.1	PABPN1	178	306	0.5817	70	63	1.1111	9787	9787	Testis	Testis	26.41275734	115.7719819	TRUE	TRUE
CHS.1509.5	CHS.1509.4	UQCRH	82	91	0.9011	88.2	83.6	1.055	4300	9796	Bone_Marrow	Bone_Marrow	18.4317	1693.525392	TRUE	TRUE
CHS.15096.8	CHS.15096.7	TSSK4	328	338	0.9704	85.7	79.1	1.0834	249	226	Testis	Testis	17.91067218	17.11640269	TRUE	TRUE
CHS.1525.4	CHS.1525.18	ATPAF1	240	328	0.7317	81.2	70.5	1.1518	447	0	Testis	-	15.15280523	0	TRUE	TRUE
CHS.1525.5	CHS.1525.18	ATPAF1	177	328	0.5396	93	70.5	1.3191	755	0	Testis	-	11.87856664	0	FALSE	TRUE
CHS.1525.7	CHS.1525.18	ATPAF1	351	328	1.0701	70.5	70.5	1	9781	0	Adrenal_Gland	-	46.47312422	0	TRUE	TRUE
CHS.15449.6	CHS.15449.4	L2HGDH	418	463	0.9028	92.5	85.9	1.0768	4	6785	Adipose_Tissue	Blood	1.37298	4.079453117	TRUE	TRUE
CHS.15449.7	CHS.15449.4	L2HGDH	426	463	0.9201	91.6	85.9	1.0664	47	6785	Adipose_Tissue	Blood	1.8975	4.079453117	TRUE	TRUE
CHS.15451.15	CHS.15451.8	CDKL1	276	357	0.7731	86.9	82.2	1.0572	1440	637	Fallopian_Tube	Cervix_Uteri	5.48483	7.58971	FALSE	FALSE
CHS.15462.4	CHS.15462.3	ABHD12B	255	362	0.7044	90.1	85.3	1.0563	1307	1069	Skin	Skin	6.437671956	5.337839264	TRUE	TRUE
CHS.15467.42	CHS.15467.51	TRIM9	718	795	0.9031	80.8	75.6	1.0688	3	629	Brain	Skin	3.29046	61.3081	TRUE	TRUE
CHS.15467.5	CHS.15467.51	TRIM9	710	795	0.8931	82.5	75.6	1.0913	3302	629	Brain	Skin	18.73391362	61.3081	TRUE	TRUE
CHS.15467.53	CHS.15467.51	TRIM9	732	795	0.9208	79.8	75.6	1.0556	3	629	Brain	Skin	3.457433333	61.3081	TRUE	TRUE
CHS.1547.6	CHS.1547.2	CMPK1	196	228	0.8596	95.7	89.3	1.0717	9795	0	Bone_Marrow	-	158.5154118	0	TRUE	TRUE
CHS.1566.30	CHS.1566.5	AGBL4	455	503	0.9046	91.4	85.9	1.064	41	764	Fallopian_Tube	Brain	3.01589	3.532517298	FALSE	FALSE
CHS.1566.8	CHS.1566.5	AGBL4	464	503	0.9225	90.2	85.9	1.0501	61	764	Testis	Brain	1.230369	3.532517298	FALSE	FALSE
CHS.15759.20	CHS.15759.26	CCDC196	240	297	0.8081	76.1	67.6	1.1257	190	189	Testis	Testis	2.701518626	7.010429802	FALSE	FALSE
CHS.15759.4	CHS.15759.26	CCDC196	165	297	0.5556	75.4	67.6	1.1154	208	189	Testis	Testis	62.28346138	7.010429802	FALSE	FALSE
CHS.15759.5	CHS.15759.26	CCDC196	215	297	0.7239	77.8	67.6	1.1509	199	189	Testis	Testis	29.62835466	7.010429802	FALSE	FALSE
CHS.15759.6	CHS.15759.26	CCDC196	162	297	0.5455	72.1	67.6	1.0666	194	189	Testis	Testis	3.642275479	7.010429802	FALSE	FALSE
CHS.15804.40	CHS.15804.10	ACTN1	826	914	0.9037	82.5	77.9	1.0591	17	8639	Blood_Vessel	Blood_Vessel	10.53252	127.8284377	TRUE	TRUE
CHS.15804.49	CHS.15804.10	ACTN1	883	914	0.9661	81.8	77.9	1.0501	1	8639	Brain	Blood_Vessel	12.1868	127.8284377	TRUE	TRUE
CHS.15938.4	CHS.15938.5	PGF	149	170	0.8765	80.1	76.2	1.0512	8985	8726	Thyroid	Thyroid	40.55568136	37.04638975	FALSE	FALSE
CHS.16023.4	CHS.16023.5	VIPAS39	444	493	0.9006	82.6	77.4	1.0672	5568	9604	Vagina	Testis	0.607724117	23.97521932	TRUE	TRUE
CHS.16167.16	CHS.16167.9	RPS6KA5	549	802	0.6845	75.4	66.4	1.1355	6968	6877	Testis	Esophagus	1.536137832	2.759488111	TRUE	TRUE
CHS.16181.10	CHS.16181.13	PPP4R3A	553	833	0.6639	88.8	76.5	1.1608	7844	2817	Cervix_Uteri	Fallopian_Tube	14.86961	5.72778	TRUE	TRUE
CHS.1643.3	CHS.1643.5	LRP8	700	963	0.7269	80.2	69.3	1.1573	3310	3149	Thyroid	Testis	9.136726293	19.07968437	TRUE	TRUE
CHS.1643.34	CHS.1643.5	LRP8	888	963	0.9221	74.5	69.3	1.075	7	3149	Brain	Testis	1.112495714	19.07968437	TRUE	TRUE
CHS.1643.7	CHS.1643.5	LRP8	901	963	0.9356	74.1	69.3	1.0693	22	3149	Heart	Testis	2.20959	19.07968437	TRUE	TRUE
CHS.16436.27	CHS.16436.20	PPP2R5C	449	579	0.7755	87.3	78.6	1.1107	9771	3291	Adrenal_Gland	Bone_Marrow	15.37372814	13.2436828	FALSE	FALSE
CHS.16436.30	CHS.16436.20	PPP2R5C	485	579	0.8377	85.8	78.6	1.0916	9757	3291	Bone_Marrow	Bone_Marrow	13.63873078	13.2436828	FALSE	FALSE
CHS.16436.61	CHS.16436.20	PPP2R5C	504	579	0.8705	84.3	78.6	1.0725	7378	3291	Bone_Marrow	Bone_Marrow	128.3361523	13.2436828	FALSE	FALSE
CHS.16496.1	CHS.16496.18	KLC1	560	639	0.8764	76.4	71.9	1.0626	9754	580	Brain	Spleen	68.50950433	6.814119375	FALSE	FALSE
CHS.16496.112	CHS.16496.18	KLC1	556	639	0.8701	76.6	71.9	1.0654	2778	580	Brain	Spleen	6.445654653	6.814119375	FALSE	FALSE
CHS.16496.113	CHS.16496.18	KLC1	565	639	0.8842	75.6	71.9	1.0515	3006	580	Nerve	Spleen	9.514466985	6.814119375	FALSE	FALSE
CHS.16496.20	CHS.16496.18	KLC1	564	639	0.8826	76.1	71.9	1.0584	7988	580	Nerve	Spleen	29.67852539	6.814119375	FALSE	FALSE
CHS.16496.60	CHS.16496.18	KLC1	551	639	0.8623	77	71.9	1.0709	1632	580	Brain	Spleen	103.3781242	6.814119375	FALSE	FALSE
CHS.16496.61	CHS.16496.18	KLC1	542	639	0.8482	78	71.9	1.0848	1178	580	Brain	Spleen	11.05960668	6.814119375	FALSE	FALSE
CHS.16576.1	CHS.16576.4	BTBD6	485	538	0.9015	86	80.5	1.0683	97	9641	Lung	Testis	8.40739	117.8552261	TRUE	TRUE
CHS.16586.14	CHS.16586.16	TEDC1	426	495	0.8606	74.6	67.5	1.1052	8970	736	Spleen	Fallopian_Tube	7.020605508	3.3455	FALSE	FALSE
CHS.16586.15	CHS.16586.16	TEDC1	393	495	0.7939	71.1	67.5	1.0533	7880	736	Nerve	Fallopian_Tube	2.960944715	3.3455	FALSE	FALSE
CHS.16586.8	CHS.16586.16	TEDC1	385	495	0.7778	74.1	67.5	1.0978	1007	736	Blood_Vessel	Fallopian_Tube	3.544558722	3.3455	FALSE	FALSE
CHS.16586.9	CHS.16586.16	TEDC1	302	495	0.6101	77.8	67.5	1.1526	1461	736	Brain	Fallopian_Tube	6.158967148	3.3455	FALSE	FALSE
CHS.166726.2	CHS.166726.3	ALDOA	364	418	0.8708	95	87.3	1.0882	9786	9696	Bone_Marrow	Muscle	4113.76698	238.9239392	FALSE	FALSE
CHS.16840.1	CHS.16840.2	GABRG3	253	467	0.5418	80.2	74.3	1.0794	665	522	Prostate	Brain	3.083829873	3.302133502	TRUE	TRUE
CHS.17218.1	CHS.17218.3	CATSPER2	414	530	0.7811	78.2	71.4	1.0952	1222	806	Testis	Testis	14.04266364	6.90285517	FALSE	FALSE
CHS.17305.11	CHS.17305.5	DUT	164	252	0.6508	87.8	71.8	1.2228	9785	9729	Bone_Marrow	Thyroid	91.81803137	29.94115202	FALSE	FALSE
CHS.17484.19	CHS.17484.21	RORA	477	523	0.912	77.2	73.4	1.0518	5	3411	Skin	Fallopian_Tube	13.0767	9.638335	TRUE	TRUE
CHS.17484.9	CHS.17484.21	RORA	468	523	0.8948	78	73.4	1.0627	7808	3411	Skin	Fallopian_Tube	50.10912047	9.638335	TRUE	TRUE
CHS.17693.2	CHS.17693.7	KIF23	856	974	0.8789	77.5	71.1	1.09	2240	1161	Bone_Marrow	Bone_Marrow	16.06215775	13.60684919	FALSE	FALSE
CHS.17711.10	CHS.17711.7	TLE3	698	769	0.9077	70.6	66.5	1.0617	1	9571	Blood	Spleen	7.32459	11.11382703	TRUE	TRUE
CHS.17711.21	CHS.17711.7	TLE3	693	769	0.9012	70.9	66.5	1.0662	4	9571	Blood	Spleen	2.5499775	11.11382703	TRUE	TRUE
CHS.17744.8	CHS.17744.9	LRRC49	642	686	0.9359	80.6	75.8	1.0633	344	6933	Testis	Pituitary	5.028389344	14.74367101	TRUE	TRUE
CHS.17750.15	CHS.17750.1	THSD4	658	1018	0.6464	76.8	66.7	1.1514	4138	561	Cervix_Uteri	Kidney	36.37190573	46.897	TRUE	TRUE
CHS.18147.2	CHS.18147.7	PDE8A	757	829	0.9131	81.4	77.2	1.0544	930	8833	Spleen	Adrenal_Gland	5.81529	27.41865414	FALSE	FALSE
CHS.18267.18	CHS.18267.14	PRC1	566	620	0.9129	81.7	77.2	1.0583	2915	6435	Testis	Bone_Marrow	30.4845384	49.35010196	FALSE	FALSE
CHS.18267.8	CHS.18267.14	PRC1	562	620	0.9065	82.1	77.2	1.0635	600	6435	Bone_Marrow	Bone_Marrow	6.480462273	49.35010196	FALSE	FALSE
CHS.18267.9	CHS.18267.14	PRC1	563	620	0.9081	81.9	77.2	1.0609	359	6435	Bone_Marrow	Bone_Marrow	4.656136471	49.35010196	FALSE	FALSE
CHS.1836.5	CHS.1836.4	UBE2U	226	317	0.7129	81.6	70.4	1.1591	202	166	Testis	Testis	0.871390184	16.1958703	TRUE	TRUE
CHS.18401.1	CHS.18401.2	PGPEP1L	196	142	1.3803	89.9	85.6	1.0502	788	287	Muscle	Esophagus	5.711567362	3.668406	FALSE	FALSE
CHS.18401.6	CHS.18401.2	PGPEP1L	204	142	1.4366	93	85.6	1.0864	219	287	Blood_Vessel	Esophagus	1.908615367	3.668406	TRUE	FALSE
CHS.18477.11	CHS.18477.12	TM2D3	221	247	0.8947	83.3	79.2	1.0518	9782	9648	Uterus	Ovary	49.91251979	23.33499973	TRUE	TRUE
CHS.1852.1	CHS.1852.3	LEPR	958	1165	0.8223	74.6	66	1.1303	3677	3179	Bone_Marrow	Pituitary	4.523321861	2.14021035	FALSE	TRUE
CHS.1852.8	CHS.1852.3	LEPR	896	1165	0.7691	78.6	66	1.1909	5774	3179	Nerve	Pituitary	36.4918544	2.14021035	FALSE	TRUE
CHS.1856.17	CHS.1856.5	PDE4B	531	736	0.7215	79.8	67.8	1.177	562	453	Prostate	Prostate	3.01721988	12.69085	TRUE	TRUE
CHS.1856.18	CHS.1856.5	PDE4B	564	736	0.7663	77.3	67.8	1.1401	8862	453	Spleen	Prostate	27.25406757	12.69085	TRUE	TRUE
CHS.1856.21	CHS.1856.5	PDE4B	503	736	0.6834	80.5	67.8	1.1873	4851	453	Pituitary	Prostate	1.103192882	12.69085	TRUE	TRUE
CHS.18655.4	CHS.18655.3	LUC7L	325	371	0.876	73.9	68.4	1.0804	9679	9677	Blood	Blood	79.01138782	33.96463079	TRUE	TRUE
CHS.18706.42	CHS.18706.30	CCDC78	319	470	0.6787	77.5	71.2	1.0885	886	296	Pituitary	Fallopian_Tube	11.20267931	89.1363375	FALSE	FALSE
CHS.18896.30	CHS.18896.16	IL32	178	188	0.9468	77.8	72.9	1.0672	225	9628	Lung	Lung	3.958634	37.67817957	FALSE	FALSE
CHS.18993.4	CHS.18993.6	SMIM22	83	88	0.9432	74.7	71	1.0521	3265	3226	Colon	Stomach	37.32391776	37.91774211	FALSE	FALSE
CHS.19027.28	CHS.19027.1	ABAT	455	500	0.91	97.1	92.3	1.052	396	7338	Pituitary	Liver	6.81591	140.9242754	TRUE	TRUE
CHS.19080.1	CHS.19080.2	CLEC16A	906	1053	0.8604	75.7	70.7	1.0707	9010	1546	Testis	Testis	8.827104739	25.94151085	TRUE	TRUE
CHS.19080.9	CHS.19080.2	CLEC16A	951	1053	0.9031	74.3	70.7	1.0509	12	1546	Testis	Testis	4.3788875	25.94151085	FALSE	TRUE
CHS.19161.10	CHS.19161.3	PARN	585	639	0.9155	84.3	79.7	1.0577	85	9568	Uterus	Testis	1.82407	34.04633671	TRUE	TRUE
CHS.19161.6	CHS.19161.3	PARN	577	639	0.903	85.3	79.7	1.0703	5	9568	Testis	Testis	1.24291	34.04633671	TRUE	TRUE
CHS.19191.12	CHS.19191.2	BMERB1	187	204	0.9167	77.6	73.4	1.0572	1757	9417	Testis	Brain	3.01992587	109.0205899	TRUE	TRUE
CHS.19260.7	CHS.19260.5	TMC5	760	1006	0.7555	76.6	63.1	1.2139	1267	1225	Testis	Small_Intestine	7.671354651	50.16718595	TRUE	FALSE
CHS.19296.20	CHS.19296.14	LDAF1	158	161	0.9814	77.8	68.4	1.1374	218	9432	Vagina	Muscle	6.01748	14.73494122	TRUE	TRUE
CHS.19518.4	CHS.19518.8	SEZ6L2	840	923	0.9101	76.3	71.8	1.0627	87	5007	Brain	Pituitary	2.975864082	54.58994147	TRUE	TRUE
CHS.19518.5	CHS.19518.8	SEZ6L2	853	923	0.9242	76.1	71.8	1.0599	3193	5007	Pituitary	Pituitary	25.91194294	54.58994147	TRUE	TRUE
CHS.19620.2	CHS.19620.3	PYCARD	176	195	0.9026	81	76	1.0658	8903	9729	Spleen	Spleen	35.21836102	75.08491186	TRUE	TRUE
CHS.19650.30	CHS.19650.2	KRBOX5	475	126	3.7698	79.6	67.6	1.1775	0	9524	-	Bone_Marrow	0	3.649353147	FALSE	FALSE
CHS.1966.4	CHS.1966.3	ACADM	385	421	0.9145	97.1	91.9	1.0566	9495	9755	Bone_Marrow	Muscle	6.097695294	97.42052522	FALSE	FALSE
CHS.19740.6	CHS.19740.5	MYLK3	478	819	0.5836	72.4	59.6	1.2148	1015	602	Heart	Heart	15.60361608	22.56208556	FALSE	FALSE
CHS.19947.3	CHS.19947.4	MT1G	61	62	0.9839	74.8	69.7	1.0732	9035	9387	Liver	Liver	833.9301348	1739.896442	FALSE	FALSE
CHS.19992.14	CHS.19992.23	KIFC3	768	826	0.9298	78.8	73.9	1.0663	2662	8438	Kidney	Nerve	18.33262875	36.66535856	TRUE	TRUE
CHS.19992.42	CHS.19992.23	KIFC3	795	826	0.9625	77.7	73.9	1.0514	1072	8438	Kidney	Nerve	13.65312833	36.66535856	FALSE	TRUE
CHS.20040.9	CHS.20040.4	CDH8	532	799	0.6658	82.8	78.1	1.0602	1154	1114	Brain	Brain	5.148542933	3.197696776	TRUE	TRUE
CHS.20082.9	CHS.20082.7	TK2	168	265	0.634	90.8	83.5	1.0874	9706	9703	Testis	Adrenal_Gland	15.82851614	18.08425933	TRUE	TRUE
CHS.20141.4	CHS.20141.2	AGRP	100	132	0.7576	71.6	67.3	1.0639	900	892	Lung	Adrenal_Gland	5.351238791	12.77813292	TRUE	TRUE
CHS.20155.10	CHS.20155.9	TSNAXIP1	366	712	0.514	90.3	79.7	1.133	5140	891	Fallopian_Tube	Fallopian_Tube	7.235088167	6.228238333	TRUE	TRUE
CHS.20155.8	CHS.20155.9	TSNAXIP1	658	712	0.9242	84.3	79.7	1.0577	850	891	Testis	Fallopian_Tube	23.25481044	6.228238333	TRUE	TRUE
CHS.20296.2	CHS.20296.1	HPR	228	348	0.6552	92.3	85.3	1.0821	6037	591	Heart	Liver	46.62777051	483.6458212	FALSE	FALSE
CHS.2046.1	CHS.2046.9	PRKACB	257	398	0.6457	93.3	87.2	1.07	7199	6451	Brain	Spleen	2.055268687	13.57904034	TRUE	TRUE
CHS.2046.2	CHS.2046.9	PRKACB	351	398	0.8819	93.8	87.2	1.0757	8812	6451	Bladder	Spleen	30.77944545	13.57904034	TRUE	TRUE
CHS.20525.10	CHS.20525.2	CIBAR2	277	304	0.9112	85.1	80.5	1.0571	3	702	Lung	Fallopian_Tube	0.900174	26.1835505	FALSE	FALSE
CHS.2060.21	CHS.2060.5	SSX2IP	560	614	0.9121	70.4	66.9	1.0523	3	6035	Testis	Bone_Marrow	8.98974	18.55015255	FALSE	FALSE
CHS.2095.62	CHS.2095.10	ODF2L	513	644	0.7966	85.7	80.4	1.0659	3324	2398	Breast	Fallopian_Tube	5.000001649	8.7603075	FALSE	FALSE
CHS.21162.6	CHS.21162.13	DLG4	664	724	0.9171	80.9	76.6	1.0561	8370	9582	Brain	Brain	2.860591204	95.24311896	TRUE	TRUE
CHS.21163.3	CHS.21163.4	ACADVL	579	655	0.884	95.7	89.2	1.0729	9786	9776	Adrenal_Gland	Muscle	197.0640398	490.4994781	TRUE	TRUE
CHS.21181.7	CHS.21181.8	TMEM95	184	176	1.0455	76.4	65.1	1.1736	90	193	Testis	Testis	0.880603422	8.503131161	TRUE	TRUE
CHS.21217.15	CHS.21217.5	TP53	234	393	0.5954	76.6	72.4	1.058	9647	7015	Adrenal_Gland	Cervix_Uteri	0.243536342	5.305605	TRUE	FALSE
CHS.21319.5	CHS.21319.8	GAS7	336	476	0.7059	88.7	82.4	1.0765	9086	8274	Brain	Cervix_Uteri	46.2068795	32.36377273	TRUE	TRUE
CHS.21359.5	CHS.21359.2	ARHGAP44	591	818	0.7225	76.2	62.9	1.2114	2123	1968	Testis	Brain	0.825912511	11.80268376	FALSE	FALSE
CHS.21410.34	CHS.21410.42	TRIM16	348	564	0.617	85.1	80.3	1.0598	2452	1865	Vagina	Vagina	1.74589087	29.30581252	FALSE	FALSE
CHS.2144.5	CHS.2144.6	KYAT3	420	454	0.9251	94.6	90	1.0511	9640	9588	Bone_Marrow	Nerve	24.79527176	25.36927138	FALSE	FALSE
CHS.21533.14	CHS.21533.5	GRAPL	116	118	0.9831	79.2	70.8	1.1186	49	2762	Spleen	Spleen	2.96227	5.099950189	FALSE	FALSE
CHS.21533.4	CHS.21533.5	GRAPL	144	118	1.2203	78	70.8	1.1017	185	2762	Spleen	Spleen	2.474553818	5.099950189	FALSE	FALSE
CHS.21533.9	CHS.21533.5	GRAPL	100	118	0.8475	87.5	70.8	1.2359	3374	2762	Spleen	Spleen	4.093814667	5.099950189	FALSE	FALSE
CHS.21574.30	CHS.21574.4	SPECC1	703	1068	0.6582	74.3	66.4	1.119	5672	4786	Ovary	Ovary	1.383343876	8.719794444	FALSE	FALSE
CHS.21574.31	CHS.21574.4	SPECC1	709	1068	0.6639	74	66.4	1.1145	6964	4786	Testis	Ovary	4.428996738	8.719794444	TRUE	FALSE
CHS.21580.13	CHS.21580.2	LGALS9B	324	356	0.9101	87.1	82.3	1.0583	54	437	Spleen	Stomach	3.36789	22.13126103	FALSE	FALSE
CHS.21580.7	CHS.21580.2	LGALS9B	323	356	0.9073	87	82.3	1.0571	121	437	Blood	Stomach	2.403246418	22.13126103	FALSE	FALSE
CHS.21659.7	CHS.21659.6	LGALS9	323	355	0.9099	87.5	82.8	1.0568	9570	8849	Spleen	Colon	55.07099186	45.29296331	FALSE	FALSE
CHS.21834.4	CHS.21834.3	ASIC2	512	563	0.9094	84.7	77.9	1.0873	827	1440	Brain	Uterus	6.757328912	9.174990533	TRUE	TRUE
CHS.21924.5	CHS.21924.3	C17orf50	173	174	0.9943	71.3	57.6	1.2378	169	268	Testis	Testis	11.22741509	129.7277824	TRUE	TRUE
CHS.21930.2	CHS.21930.3	CCL5	91	154	0.5909	84.6	52.1	1.6238	8848	3021	Blood	Blood	125.7673471	43.67350391	FALSE	FALSE
CHS.21934.15	CHS.21934.12	RDM1	236	284	0.831	83.3	76.3	1.0917	987	591	Bone_Marrow	Testis	2.976842745	8.164712565	FALSE	FALSE
CHS.21957.2	CHS.21957.4	CCL4L2	64	103	0.6214	84.2	50.3	1.674	6869	89	Spleen	Blood	6.229961864	7.91101339	FALSE	FALSE
CHS.21957.8	CHS.21957.4	CCL4L2	87	103	0.8447	84.3	50.3	1.6759	2224	89	Blood	Blood	12.18410163	7.91101339	FALSE	FALSE
CHS.22052.23	CHS.22052.2	CACNB1	478	598	0.7993	71.6	64.4	1.1118	5253	5249	Muscle	Brain	2.181639508	24.09066721	TRUE	TRUE
CHS.22154.5	CHS.22154.4	KRT23	285	422	0.6754	84.4	77.2	1.0933	1655	259	Testis	Adipose_Tissue	15.44221894	17.680194	FALSE	FALSE
CHS.22356.1	CHS.22356.2	MPP3	315	585	0.5385	83.4	77.6	1.0747	7559	2261	Heart	Brain	16.86110073	17.76919642	FALSE	FALSE
CHS.22358.9	CHS.22358.21	CD300LG	247	332	0.744	76.9	66.3	1.1599	4523	3871	Adipose_Tissue	Adipose_Tissue	43.33621263	64.01432617	TRUE	TRUE
CHS.22367.5	CHS.22367.6	PYY	90	97	0.9278	75.1	69.2	1.0853	678	616	Colon	Colon	30.9510784	66.63132507	TRUE	TRUE
CHS.2237.8	CHS.2237.7	FNBP1L	551	605	0.9107	81.1	76.6	1.0587	8668	623	Thyroid	Brain	24.39860919	5.465055129	TRUE	TRUE
CHS.2237.9	CHS.2237.7	FNBP1L	547	605	0.9041	81.4	76.6	1.0627	8640	623	Breast	Brain	17.19793459	5.465055129	TRUE	TRUE
CHS.22680.1	CHS.22680.2	SPATA20	742	802	0.9252	92.3	87.7	1.0525	9581	9565	Thyroid	Thyroid	74.81857694	46.54154867	FALSE	FALSE
CHS.22691.2	CHS.22691.1	ANKRD40CL	119	114	1.0439	80.7	74.5	1.0832	212	346	Colon	Small_Intestine	6.124372585	26.52340692	FALSE	FALSE
CHS.22734.2	CHS.22734.4	TOM1L1	346	476	0.7269	76.3	65.1	1.172	8572	8341	Thyroid	Thyroid	3.361331295	36.28051142	FALSE	FALSE
CHS.22852.1	CHS.22852.2	RPS6KB1	472	525	0.899	76.4	72.2	1.0582	2567	0	Cervix_Uteri	-	5.04092	0	TRUE	TRUE
CHS.22852.3	CHS.22852.2	RPS6KB1	451	525	0.859	77.4	72.2	1.072	1479	0	Pituitary	-	1.163907385	0	TRUE	TRUE
CHS.22937.12	CHS.22937.9	STRADA	306	431	0.71	83.1	78.5	1.0586	8462	7130	Testis	Pituitary	2.6844023	15.37152732	TRUE	TRUE
CHS.22937.22	CHS.22937.9	STRADA	285	431	0.6613	86.3	78.5	1.0994	8519	7130	Thyroid	Pituitary	1.367271729	15.37152732	TRUE	TRUE
CHS.22937.31	CHS.22937.9	STRADA	266	431	0.6172	85.7	78.5	1.0917	8168	7130	Nerve	Pituitary	1.278712738	15.37152732	TRUE	TRUE
CHS.22937.4	CHS.22937.9	STRADA	394	431	0.9142	83	78.5	1.0573	8742	7130	Testis	Pituitary	7.479670758	15.37152732	TRUE	TRUE
CHS.22937.5	CHS.22937.9	STRADA	348	431	0.8074	83.6	78.5	1.065	8743	7130	Nerve	Pituitary	4.574035695	15.37152732	TRUE	TRUE
CHS.22937.8	CHS.22937.9	STRADA	373	431	0.8654	86	78.5	1.0955	8796	7130	Testis	Pituitary	31.08410375	15.37152732	TRUE	TRUE
CHS.22945.3	CHS.22945.5	SMARCD2	483	531	0.9096	78.2	74.1	1.0553	7835	9743	Skin	Skin	1.941532983	101.7974761	TRUE	TRUE
CHS.2297.8	CHS.2297.6	PTBP2	480	531	0.904	79.4	71.2	1.1152	2476	7981	Uterus	Testis	0.356778528	17.01472149	TRUE	TRUE
CHS.23027.1	CHS.23027.2	PITPNC1	268	332	0.8072	91	80.9	1.1248	9643	8317	Brain	Brain	15.51616973	3.027746602	TRUE	TRUE
CHS.23152.1	CHS.23152.2	CPSF4L	190	179	1.0615	85.1	80.6	1.0558	12	24	Testis	Breast	1.908122	2.10466	FALSE	FALSE
CHS.23152.3	CHS.23152.2	CPSF4L	104	179	0.581	86.1	80.6	1.0682	40	24	Thyroid	Breast	1.5878895	2.10466	FALSE	FALSE
CHS.23235.6	CHS.23235.3	SLC16A5	460	505	0.9109	84.4	79.3	1.0643	4754	8323	Kidney	Kidney	34.99062667	11.96088783	FALSE	FALSE
CHS.23357.35	CHS.23357.13	SEPTIN9	335	568	0.5898	84.2	63.1	1.3344	9625	9227	Spleen	Cervix_Uteri	10.61096296	67.6317	TRUE	TRUE
CHS.2339.8	CHS.2339.12	CDC14A	383	594	0.6448	88.9	70.3	1.2646	6343	6326	Breast	Fallopian_Tube	0.409894096	11.00188714	TRUE	TRUE
CHS.23394.4	CHS.23394.6	C17orf99	247	265	0.9321	78.5	73.6	1.0666	143	328	Bone_Marrow	Bone_Marrow	2.190274621	7.1665719	FALSE	FALSE
CHS.23425.29	CHS.23425.19	CYTH1	372	398	0.9347	88.2	84	1.05	1550	9741	Vagina	Spleen	14.46510273	55.54600763	TRUE	TRUE
CHS.237.25	CHS.237.24	KCNAB2	300	415	0.7229	91.4	85	1.0753	7083	216	Kidney	Brain	15.34636313	0.594450204	FALSE	FALSE
CHS.23961.4	CHS.23961.5	COLEC12	725	742	0.9771	70.6	65.2	1.0828	534	7902	Cervix_Uteri	Cervix_Uteri	3.83973	74.02875	TRUE	TRUE
CHS.24209.1	CHS.24209.2	SEH1L	360	421	0.8551	85.7	78.2	1.0959	9587	8314	Bone_Marrow	Muscle	64.04920784	20.41148053	TRUE	TRUE
CHS.24209.4	CHS.24209.2	SEH1L	380	421	0.9026	83.2	78.2	1.0639	124	8314	Testis	Muscle	2.079647075	20.41148053	TRUE	TRUE
CHS.24244.1	CHS.24244.2	POTEC	384	542	0.7085	72.4	64.7	1.119	196	192	Testis	Testis	1.364011255	1.856904859	FALSE	FALSE
CHS.24423.12	CHS.24423.4	KLHL14	408	628	0.6497	94	87.6	1.0731	768	489	Thyroid	Fallopian_Tube	13.52019338	20.2647	TRUE	TRUE
CHS.24436.11	CHS.24436.114	DTNA	683	770	0.887	70.4	67	1.0507	5728	30	Bladder	Brain	13.58695	4.145537333	TRUE	FALSE
CHS.24436.2	CHS.24436.114	DTNA	513	770	0.6662	79.1	67	1.1806	56	30	Brain	Brain	16.48425268	4.145537333	FALSE	FALSE
CHS.24436.32	CHS.24436.114	DTNA	510	770	0.6623	79.5	67	1.1866	6706	30	Brain	Brain	21.26484013	4.145537333	TRUE	FALSE
CHS.24436.36	CHS.24436.114	DTNA	540	770	0.7013	77.6	67	1.1582	71	30	Brain	Brain	14.143927	4.145537333	FALSE	FALSE
CHS.24436.60	CHS.24436.114	DTNA	567	770	0.7364	75.8	67	1.1313	1999	30	Pituitary	Brain	7.85492	4.145537333	FALSE	FALSE
CHS.24550.5	CHS.24550.3	ATP5F1A	503	553	0.9096	91.9	86.6	1.0612	9727	9786	Testis	Heart	69.08933301	287.2507002	FALSE	TRUE
CHS.24565.41	CHS.24565.3	PIAS2	507	621	0.8164	75.1	67.3	1.1159	8914	8895	Testis	Fallopian_Tube	2.445242285	4.175102857	FALSE	FALSE
CHS.24584.3	CHS.24584.2	SMAD2	437	467	0.9358	80.3	75.5	1.0636	8911	9762	Thyroid	Thyroid	1.284278385	4.358663556	TRUE	TRUE
CHS.2465.19	CHS.2465.1	AMPD2	761	825	0.9224	83.1	78.8	1.0546	7514	8951	Pituitary	Brain	1.606975269	10.57107836	FALSE	FALSE
CHS.24667.22	CHS.24667.4	DCC	965	1447	0.6669	88.2	68	1.2971	137	84	Testis	Brain	5.835456861	3.090876052	TRUE	TRUE
CHS.24849.3	CHS.24849.4	CDH7	630	785	0.8025	85.5	79	1.0823	647	644	Nerve	Skin	0.372151156	6.17867	TRUE	TRUE
CHS.2497.1	CHS.2497.13	LAMTOR5	90	91	0.989	87.4	66.1	1.3222	6959	0	Testis	-	18.07336738	0	FALSE	TRUE
CHS.2497.12	CHS.2497.13	LAMTOR5	72	91	0.7912	93.8	66.1	1.4191	1	0	Blood	-	5.23378	0	TRUE	TRUE
CHS.25065.2	CHS.25065.8	SLC66A2	253	271	0.9336	86.5	81.4	1.0627	6013	7805	Testis	Nerve	81.91385724	72.14657457	TRUE	TRUE
CHS.25249.16	CHS.25249.15	IZUMO4	214	232	0.9224	83.2	67.4	1.2344	7438	8646	Testis	Testis	173.1280198	366.1733905	TRUE	FALSE
CHS.25482.9	CHS.25482.6	TRIP10	545	601	0.9068	82.1	78	1.0526	9633	8883	Lung	Muscle	91.28067513	217.4010952	TRUE	TRUE
CHS.25532.8	CHS.25532.7	CD209	404	404	1	71.3	67.6	1.0547	330	2505	Vagina	Fallopian_Tube	4.72106	12.119835	TRUE	TRUE
CHS.25533.12	CHS.25533.7	CLEC4M	376	399	0.9424	71.6	66.9	1.0703	0	807	-	Liver	0	18.25365799	FALSE	FALSE
CHS.25533.2	CHS.25533.7	CLEC4M	371	399	0.9298	78.9	66.9	1.1794	20	807	Breast	Liver	2.146625	18.25365799	FALSE	FALSE
CHS.25663.17	CHS.25663.6	PDE4A	647	886	0.7302	70.1	62.2	1.127	3041	2188	Brain	Brain	9.375784283	10.00116782	TRUE	TRUE
CHS.25676.1	CHS.25676.4	ILF3	706	898	0.7862	70.4	61.8	1.1392	9780	9779	Bone_Marrow	Uterus	64.09488529	71.95881875	TRUE	TRUE
CHS.25676.2	CHS.25676.4	ILF3	702	898	0.7817	70.5	61.8	1.1408	9779	9779	Bone_Marrow	Uterus	65.70447451	71.95881875	TRUE	TRUE
CHS.25709.2	CHS.25709.1	PLPPR2	343	452	0.7588	78.8	66.2	1.1903	9748	1447	Brain	Pituitary	40.44646462	21.0427	FALSE	FALSE
CHS.25735.3	CHS.25735.11	ZNF439	363	504	0.7202	78.2	66.8	1.1707	4822	2508	Testis	Bladder	4.092593826	5.4920775	FALSE	FALSE
CHS.25978.23	CHS.25978.6	EPS15L1	601	910	0.6604	75.1	64.7	1.1607	9719	9703	Skin	Brain	8.151013258	17.476596	FALSE	FALSE
CHS.26148.2	CHS.26148.1	YJEFN3	249	299	0.8328	92.8	81.6	1.1373	5018	3358	Brain	Testis	74.26177283	24.97374916	FALSE	FALSE
CHS.26329.4	CHS.26329.8	C19orf12	77	141	0.5461	88.4	54.3	1.628	8487	7951	Adipose_Tissue	Muscle	13.57323176	5.588936452	FALSE	FALSE
CHS.26383.1	CHS.26383.2	WDR88	426	472	0.9025	77.8	73.9	1.0528	192	193	Testis	Testis	6.259007146	9.983290365	FALSE	TRUE
CHS.26463.1	CHS.26463.2	MAG	582	626	0.9297	84.9	80.5	1.0547	1642	1892	Nerve	Brain	47.30464706	104.7531052	FALSE	FALSE
CHS.26577.2	CHS.26577.3	ZNF585A	714	769	0.9285	77.1	70.8	1.089	4058	6541	Bladder	Brain	2.731354444	2.104094211	FALSE	FALSE
CHS.26623.2	CHS.26623.7	YIF1B	283	314	0.9013	73.6	69.4	1.0605	8585	9695	Bone_Marrow	Bone_Marrow	9.878136535	17.98003386	TRUE	TRUE
CHS.26656.5	CHS.26656.4	SIRT2	234	389	0.6015	85.9	79.7	1.0778	9709	9651	Testis	Testis	3.158760942	20.25001754	TRUE	TRUE
CHS.26656.6	CHS.26656.4	SIRT2	352	389	0.9049	84.4	79.7	1.059	9782	9651	Brain	Testis	115.7701183	20.25001754	TRUE	TRUE
CHS.26722.14	CHS.26722.3	ZNF546	798	836	0.9545	74.3	69.7	1.066	2098	980	Cervix_Uteri	Cervix_Uteri	3.94382	2.27469	FALSE	FALSE
CHS.26722.4	CHS.26722.3	ZNF546	810	836	0.9689	73.5	69.7	1.0545	1663	980	Testis	Cervix_Uteri	2.499107974	2.27469	FALSE	FALSE
CHS.26732.5	CHS.26732.2	CCNP	329	307	1.0717	78.8	71.6	1.1006	806	900	Fallopian_Tube	Fallopian_Tube	0.547344	2.94272	FALSE	FALSE
CHS.26852.15	CHS.26852.6	LIPE	821	1076	0.763	74.6	64.1	1.1638	8175	4537	Adipose_Tissue	Testis	65.25308508	39.41329507	FALSE	FALSE
CHS.26947.3	CHS.26947.2	ZNF229	479	825	0.5806	83.8	58.5	1.4325	3047	2226	Thyroid	Fallopian_Tube	3.175537969	2.32078	FALSE	FALSE
CHS.26967.6	CHS.26967.7	CBLC	431	474	0.9093	85.3	79.3	1.0757	2	2990	Thyroid	Skin	2.31659	44.49352786	FALSE	FALSE
CHS.26970.2	CHS.26970.3	NECTIN2	479	538	0.8903	79	73.6	1.0734	9642	9297	Lung	Testis	67.14063934	66.36275502	TRUE	TRUE
CHS.26987.4	CHS.26987.5	NKPD1	657	832	0.7897	74	64.6	1.1455	249	167	Skin	Skin	2.848126704	4.018015797	TRUE	TRUE
CHS.26991.2	CHS.26991.3	EXOC3L2	476	802	0.5935	87.6	74	1.1838	4100	238	Thyroid	Uterus	38.23616929	13.82262	TRUE	TRUE
CHS.27152.11	CHS.27152.14	LIG1	851	919	0.926	75.9	71.8	1.0571	1031	9038	Bladder	Bone_Marrow	0.426271	30.03777624	TRUE	TRUE
CHS.27157.39	CHS.27157.60	CARD8	487	537	0.9069	75.2	69.6	1.0805	8996	9115	Thyroid	Bone_Marrow	2.233951513	2.05130948	FALSE	FALSE
CHS.27157.49	CHS.27157.60	CARD8	486	537	0.905	75.7	69.6	1.0876	20	9115	Blood	Bone_Marrow	5.63544	2.05130948	FALSE	FALSE
CHS.27250.14	CHS.27250.1	PIH1D1	273	290	0.9414	89.7	81	1.1074	1042	9779	Spleen	Bone_Marrow	6.371624	133.3743745	FALSE	FALSE
CHS.27273.19	CHS.27273.13	PRMT1	342	371	0.9218	92.4	87.8	1.0524	4237	9741	Cervix_Uteri	Muscle	10.88653	32.93160184	FALSE	TRUE
CHS.27353.31	CHS.27353.28	KLK4	205	254	0.8071	92.8	87.8	1.0569	1233	28	Prostate	Uterus	401.8819805	11.45676	TRUE	TRUE
CHS.27353.6	CHS.27353.28	KLK4	159	254	0.626	95.6	87.8	1.0888	1233	28	Prostate	Uterus	401.8819805	11.45676	FALSE	TRUE
CHS.27358.3	CHS.27358.5	KLK8	139	260	0.5346	94.3	87.8	1.074	1660	1327	Esophagus	Skin	13.48557266	25.49380879	TRUE	TRUE
CHS.27404.4	CHS.27404.3	SIGLEC5	500	551	0.9074	79.7	75.7	1.0528	8	83	Blood	Blood	6.793285	73.74943852	FALSE	FALSE
CHS.27443.2	CHS.27443.1	ZNF480	492	535	0.9196	71.9	67.4	1.0668	5449	9666	Bladder	Bone_Marrow	0.262575875	7.301312353	FALSE	FALSE
CHS.27564.27	CHS.27564.9	LILRB1	599	652	0.9187	75.8	71.5	1.0601	6	3408	Blood	Fallopian_Tube	1.330056333	3.217387333	FALSE	FALSE
CHS.27564.28	CHS.27564.9	LILRB1	598	652	0.9172	76	71.5	1.0629	4	3408	Blood	Fallopian_Tube	3.8507465	3.217387333	FALSE	FALSE
CHS.27572.1	CHS.27572.2	KIR2DL4	273	342	0.7982	82	66.5	1.2331	615	446	Spleen	Spleen	4.064491811	1.527340551	FALSE	FALSE
CHS.27581.1	CHS.27581.3	GP6	321	620	0.5177	76.7	49.3	1.5558	226	216	Bone_Marrow	Brain	0.906945355	2.00556	FALSE	FALSE
CHS.27581.2	CHS.27581.3	GP6	339	620	0.5468	74.5	49.3	1.5112	488	216	Bone_Marrow	Brain	5.53784989	2.00556	FALSE	FALSE
CHS.27587.2	CHS.27587.4	TNNT1	251	278	0.9029	77.4	73	1.0603	6705	4424	Muscle	Muscle	1676.319244	608.3907783	FALSE	FALSE
CHS.27662.3	CHS.27662.1	NLRP8	891	1048	0.8502	85.5	80.5	1.0621	11	0	Breast	-	1.491526	0	FALSE	FALSE
CHS.2847.4	CHS.2847.6	HJV	313	426	0.7347	85.1	80.8	1.0532	1673	1299	Muscle	Muscle	89.92491387	54.80442616	TRUE	TRUE
CHS.28605.26	CHS.28605.25	RNASEH1	169	286	0.5909	91.6	82.2	1.1144	6383	0	Testis	-	4.750316964	0	TRUE	TRUE
CHS.28610.12	CHS.28610.3	COLEC11	245	271	0.9041	80.3	76.3	1.0524	2747	6233	Kidney	Liver	5.815690114	60.25293043	TRUE	TRUE
CHS.28738.17	CHS.28738.13	RRM2	339	389	0.8715	86.6	80.3	1.0785	151	0	Spleen	-	2.86566	0	TRUE	TRUE
CHS.28754.10	CHS.28754.9	ATP6V1C2	381	427	0.8923	91.2	84.5	1.0793	1876	1490	Kidney	Skin	24.933512	44.51382411	FALSE	FALSE
CHS.29005.1	CHS.29005.2	FAM166C	184	201	0.9154	78.6	74.5	1.055	420	1681	Testis	Testis	19.70400425	20.12825819	TRUE	TRUE
CHS.29020.25	CHS.29020.11	AGBL5	801	886	0.9041	71.9	67.6	1.0636	68	8231	Pituitary	Testis	6.3828	158.7442956	TRUE	TRUE
CHS.29020.8	CHS.29020.11	AGBL5	717	886	0.8093	76.6	67.6	1.1331	9648	8231	Bone_Marrow	Testis	32.15059604	158.7442956	TRUE	TRUE
CHS.29020.9	CHS.29020.11	AGBL5	805	886	0.9086	71.7	67.6	1.0607	39	8231	Testis	Testis	6.156451182	158.7442956	TRUE	TRUE
CHS.29035.9	CHS.29035.10	SLC30A3	412	388	1.0619	79.4	74.6	1.0643	877	2077	Testis	Brain	11.54123686	33.14404764	TRUE	TRUE
CHS.29099.18	CHS.29099.7	TOGARAM2	546	1019	0.5358	82.5	61.4	1.3436	2257	835	Muscle	Fallopian_Tube	9.975942072	16.293924	TRUE	FALSE
CHS.29198.14	CHS.29198.4	VIT	629	693	0.9076	80.9	76.5	1.0575	487	5679	Nerve	Nerve	2.61408027	36.05070746	FALSE	FALSE
CHS.29198.31	CHS.29198.4	VIT	628	693	0.9062	80.4	76.5	1.051	1	5679	Thyroid	Nerve	0.834717	36.05070746	FALSE	FALSE
CHS.29315.6	CHS.29315.11	MTA3	515	594	0.867	82.3	77.3	1.0647	9473	9093	Adrenal_Gland	Uterus	23.12686398	11.66342573	TRUE	TRUE
CHS.2934.4	CHS.2934.11	NOTCH2NLC	236	293	0.8055	85.2	77.6	1.0979	1809	579	Testis	Cervix_Uteri	21.14073528	20.5481	TRUE	TRUE
CHS.29447.5	CHS.29447.6	FBXO11	843	927	0.9094	86.9	82.4	1.0546	177	9656	Liver	Uterus	4.86232	51.68476979	FALSE	FALSE
CHS.29500.29	CHS.29500.16	ACYP2	99	172	0.5756	89.1	61.7	1.4441	9775	8724	Muscle	Adrenal_Gland	61.30747945	10.33182038	FALSE	FALSE
CHS.29631.41	CHS.29631.7	WDPCP	673	746	0.9021	81.9	75.7	1.0819	44	6780	Prostate	Fallopian_Tube	1.94072	3.924734286	FALSE	FALSE
CHS.29631.42	CHS.29631.7	WDPCP	693	746	0.929	79.9	75.7	1.0555	34	6780	Lung	Fallopian_Tube	2.5618	3.924734286	FALSE	FALSE
CHS.29770.23	CHS.29770.5	NFU1	230	254	0.9055	82.2	77.9	1.0552	7919	9777	Pituitary	Muscle	4.904638131	35.0077943	FALSE	TRUE
CHS.29800.4	CHS.29800.9	FAM136A	138	245	0.5633	95.2	62.4	1.5256	9772	8842	Bone_Marrow	Bone_Marrow	48.12008137	6.96079652	TRUE	TRUE
CHS.29878.1	CHS.29878.4	DGUOK	180	277	0.6498	93.6	85.7	1.0922	9789	9775	Pituitary	Testis	35.28945308	34.67958193	FALSE	TRUE
CHS.29904.8	CHS.29904.7	CCDC142	566	750	0.7547	82.7	71.7	1.1534	1154	5	Kidney	Nerve	7.950585	1.28206	FALSE	TRUE
CHS.29929.2	CHS.29929.1	TACR1	311	407	0.7641	79.4	71.3	1.1136	3535	3242	Cervix_Uteri	Cervix_Uteri	1.20653	8.028271111	TRUE	TRUE
CHS.29951.11	CHS.29951.3	LRRTM4	518	590	0.878	77.9	71.6	1.088	1195	934	Nerve	Brain	2.006058196	3.32588012	TRUE	TRUE
CHS.30186.13	CHS.30186.1	KCNIP3	230	256	0.8984	72.6	66.2	1.0967	7478	2498	Testis	Brain	25.01105768	23.09919096	TRUE	TRUE
CHS.30265.21	CHS.30265.13	ZAP70	312	619	0.504	86	78.6	1.0941	7353	5009	Spleen	Spleen	3.796227941	40.91009686	FALSE	FALSE
CHS.3029.13	CHS.3029.7	MINDY1	327	469	0.6972	79	71.4	1.1064	8742	6237	Thyroid	Esophagus	4.62328935	11.78824034	TRUE	FALSE
CHS.30350.14	CHS.30350.2	IL1RL1	328	556	0.5899	87	81	1.0741	5393	1498	Lung	Lung	168.1548102	3.545717304	FALSE	FALSE
CHS.30490.17	CHS.30490.8	RGPD6	904	1765	0.5122	81.6	65.8	1.2401	0	0	-	-	0	0	FALSE	FALSE
CHS.30565.4	CHS.30565.1	IL36B	157	164	0.9573	93	50.2	1.8526	775	1	Skin	Skin	8.377061376	0.01238	FALSE	FALSE
CHS.30584.13	CHS.30584.10	CBWD2	359	395	0.9089	79	75	1.0533	9721	9768	Bone_Marrow	Thyroid	12.42783647	17.84112172	TRUE	TRUE
CHS.30750.10	CHS.30750.19	TEX51	170	166	1.0241	78.1	61.9	1.2617	62	207	Testis	Testis	3.563024339	42.7085864	FALSE	FALSE
CHS.30750.11	CHS.30750.19	TEX51	227	166	1.3675	71.7	61.9	1.1583	6	207	Testis	Testis	3.227513333	42.7085864	FALSE	FALSE
CHS.30750.22	CHS.30750.19	TEX51	198	166	1.1928	76.9	61.9	1.2423	190	207	Testis	Testis	30.33733234	42.7085864	FALSE	FALSE
CHS.30750.26	CHS.30750.19	TEX51	197	166	1.1867	74.1	61.9	1.1971	31	207	Testis	Testis	3.693730333	42.7085864	FALSE	FALSE
CHS.30750.27	CHS.30750.19	TEX51	175	166	1.0542	71.9	61.9	1.1616	37	207	Testis	Testis	3.452751351	42.7085864	FALSE	FALSE
CHS.30750.3	CHS.30750.19	TEX51	190	166	1.1446	76.5	61.9	1.2359	15	207	Testis	Testis	3.400304667	42.7085864	FALSE	FALSE
CHS.30750.4	CHS.30750.19	TEX51	162	166	0.9759	72.4	61.9	1.1696	9	207	Testis	Testis	2.280705556	42.7085864	FALSE	FALSE
CHS.30750.5	CHS.30750.19	TEX51	156	166	0.9398	75.2	61.9	1.2149	48	207	Testis	Testis	2.880794604	42.7085864	FALSE	FALSE
CHS.30750.8	CHS.30750.19	TEX51	204	166	1.2289	79.2	61.9	1.2795	30	207	Testis	Testis	3.3034839	42.7085864	FALSE	FALSE
CHS.30750.9	CHS.30750.19	TEX51	203	166	1.2229	79	61.9	1.2763	19	207	Testis	Testis	3.753539474	42.7085864	FALSE	FALSE
CHS.30752.20	CHS.30752.33	BIN1	409	593	0.6897	78.6	65.4	1.2018	9664	3171	Nerve	Brain	23.46161702	41.97572378	FALSE	FALSE
CHS.30752.21	CHS.30752.33	BIN1	439	593	0.7403	75.6	65.4	1.156	9714	3171	Adrenal_Gland	Brain	50.33182298	41.97572378	FALSE	FALSE
CHS.30752.22	CHS.30752.33	BIN1	475	593	0.801	72.1	65.4	1.1024	6791	3171	Nerve	Brain	13.25357929	41.97572378	FALSE	FALSE
CHS.30752.23	CHS.30752.33	BIN1	482	593	0.8128	71.4	65.4	1.0917	9684	3171	Cervix_Uteri	Brain	53.51288636	41.97572378	FALSE	FALSE
CHS.30752.26	CHS.30752.33	BIN1	424	593	0.715	77.3	65.4	1.182	8437	3171	Muscle	Brain	450.852011	41.97572378	FALSE	FALSE
CHS.30752.27	CHS.30752.33	BIN1	454	593	0.7656	73.8	65.4	1.1284	8467	3171	Muscle	Brain	401.3735077	41.97572378	FALSE	FALSE
CHS.30752.28	CHS.30752.33	BIN1	497	593	0.8381	70.5	65.4	1.078	8446	3171	Muscle	Brain	134.5381674	41.97572378	FALSE	FALSE
CHS.30752.30	CHS.30752.33	BIN1	506	593	0.8533	72.5	65.4	1.1086	5000	3171	Muscle	Brain	10.00315471	41.97572378	FALSE	FALSE
CHS.30758.1	CHS.30758.2	CYP27C1	416	537	0.7747	90.9	85.3	1.0657	357	193	Bladder	Cervix_Uteri	4.830486667	7.76515	FALSE	FALSE
CHS.30758.12	CHS.30758.2	CYP27C1	447	537	0.8324	90	85.3	1.0551	357	193	Bladder	Cervix_Uteri	4.830486667	7.76515	FALSE	FALSE
CHS.30758.4	CHS.30758.2	CYP27C1	372	537	0.6927	90.7	85.3	1.0633	418	193	Cervix_Uteri	Cervix_Uteri	3.3880375	7.76515	FALSE	FALSE
CHS.30833.15	CHS.30833.6	IMP4	206	291	0.7079	90.8	85	1.0682	9790	9775	Brain	Bone_Marrow	14.54843767	30.92448485	TRUE	TRUE
CHS.30878.1	CHS.30878.4	ANKRD30BL	251	258	0.9729	85.7	76.5	1.1203	245	284	Testis	Testis	8.231692315	6.974922225	FALSE	FALSE
CHS.31062.17	CHS.31062.3	LYPD6B	183	207	0.8841	80	73.2	1.0929	2700	2389	Skin	Bladder	24.48808997	10.42857714	FALSE	TRUE
CHS.31099.11	CHS.31099.8	CACNB4	473	520	0.9096	72	68.4	1.0526	618	564	Brain	Brain	10.33834104	4.775478442	TRUE	TRUE
CHS.31231.29	CHS.31231.12	GCA	198	217	0.9124	84.7	78.9	1.0735	2546	9696	Thyroid	Blood	0.737750194	94.60842439	TRUE	TRUE
CHS.31359.3	CHS.31359.4	MAP3K20	455	800	0.5687	72.4	66.4	1.0904	8825	7530	Muscle	Bone_Marrow	109.0549532	12.76539882	TRUE	TRUE
CHS.31617.60	CHS.31617.28	ANKAR	782	1434	0.5453	89.8	84.9	1.0577	196	68	Thyroid	Testis	3.3003568	7.051454412	FALSE	FALSE
CHS.31712.25	CHS.31712.3	CCDC150	748	1101	0.6794	79.2	74.4	1.0645	252	2	Liver	Testis	2.13029	5.3961835	FALSE	FALSE
CHS.31748.1	CHS.31748.11	FTCDNL1	77	138	0.558	85.1	77.8	1.0938	4475	2121	Thyroid	Thyroid	2.279310458	0.398527303	FALSE	FALSE
CHS.31748.14	CHS.31748.11	FTCDNL1	147	138	1.0652	78	77.8	1.0026	5383	2121	Thyroid	Thyroid	2.87101979	0.398527303	FALSE	FALSE
CHS.31771.4	CHS.31771.3	CLK1	333	484	0.688	94.9	77.7	1.2214	9789	9789	Thyroid	Nerve	153.5934668	175.9537743	TRUE	TRUE
CHS.31782.12	CHS.31782.11	CFLAR	445	480	0.9271	84	80	1.05	6457	9784	Muscle	Thyroid	2.269996436	7.461101548	FALSE	FALSE
CHS.31784.6	CHS.31784.3	CASP10	479	522	0.9176	82.8	78.5	1.0548	4300	6373	Lung	Spleen	4.394189786	14.04961254	FALSE	FALSE
CHS.31868.13	CHS.31868.3	MDH1B	472	518	0.9112	92	86.4	1.0648	1109	3095	Fallopian_Tube	Testis	14.76425333	20.02849906	FALSE	FALSE
CHS.31922.1	CHS.31922.2	MYL1	150	194	0.7732	91.6	86.6	1.0577	5928	4101	Muscle	Muscle	2842.567316	1533.058104	FALSE	FALSE
CHS.3203.2	CHS.3203.23	TPM3	158	285	0.5544	95.8	90.4	1.0597	8414	7018	Brain	Muscle	2.172454876	662.2156894	TRUE	TRUE
CHS.32039.20	CHS.32039.2	PNKD	361	385	0.9377	92.8	82.2	1.129	8208	5965	Liver	Brain	86.24095145	26.20143181	TRUE	TRUE
CHS.3207.21	CHS.3207.7	C1orf43	189	253	0.747	79.8	71.6	1.1145	9795	9795	Pituitary	Muscle	3.531631392	183.974914	TRUE	TRUE
CHS.32305.17	CHS.32305.3	PSMD1	924	953	0.9696	76.4	72.2	1.0582	113	9735	Muscle	Bone_Marrow	2.238847757	104.9178176	TRUE	TRUE
CHS.32305.18	CHS.32305.3	PSMD1	923	953	0.9685	76.5	72.2	1.0596	35	9735	Muscle	Bone_Marrow	2.94277175	104.9178176	TRUE	TRUE
CHS.32305.21	CHS.32305.3	PSMD1	893	953	0.937	76.4	72.2	1.0582	15	9735	Muscle	Bone_Marrow	1.946028692	104.9178176	TRUE	TRUE
CHS.32305.4	CHS.32305.3	PSMD1	922	953	0.9675	75.9	72.2	1.0512	9326	9735	Bone_Marrow	Bone_Marrow	2.479493535	104.9178176	TRUE	TRUE
CHS.32310.53	CHS.32310.12	ARMC9	665	818	0.813	79.5	69.8	1.139	6699	2603	Esophagus	Uterus	14.62567786	12.58245492	FALSE	TRUE
CHS.32363.31	CHS.32363.1	EIF4E2	229	245	0.9347	82.9	77.9	1.0642	49	9791	Testis	Bone_Marrow	19.83068	29.54843431	TRUE	TRUE
CHS.32363.7	CHS.32363.1	EIF4E2	231	245	0.9429	82.8	77.9	1.0629	68	9791	Testis	Bone_Marrow	5.427646667	29.54843431	TRUE	TRUE
CHS.32369.6	CHS.32369.8	NGEF	618	710	0.8704	75.1	70.2	1.0698	4574	782	Brain	Small_Intestine	99.54453432	24.68488299	TRUE	TRUE
CHS.32507.34	CHS.32507.5	LRRFIP1	428	640	0.6687	78.7	70.9	1.11	2218	1544	Blood_Vessel	Heart	18.45798152	23.67176745	TRUE	TRUE
CHS.32507.4	CHS.32507.5	LRRFIP1	404	640	0.6312	78.3	70.9	1.1044	3239	1544	Blood_Vessel	Heart	23.53530003	23.67176745	TRUE	TRUE
CHS.32507.50	CHS.32507.5	LRRFIP1	394	640	0.6156	77.6	70.9	1.0945	3720	1544	Adipose_Tissue	Heart	21.99806418	23.67176745	TRUE	TRUE
CHS.32507.57	CHS.32507.5	LRRFIP1	418	640	0.6531	79	70.9	1.1142	1642	1544	Cervix_Uteri	Heart	17.6078	23.67176745	TRUE	TRUE
CHS.3251.12	CHS.3251.5	ADAM15	796	863	0.9224	76.9	73.2	1.0505	8200	9638	Nerve	Skin	2.49089082	22.11212837	FALSE	FALSE
CHS.32599.12	CHS.32599.15	CROCC2	897	1653	0.5426	81	72.7	1.1142	16	0	Lung	-	7.164146364	0	FALSE	FALSE
CHS.32606.30	CHS.32606.29	MTERF4	193	381	0.5066	85.3	76	1.1224	9739	9625	Cervix_Uteri	Thyroid	4.289731455	20.63370736	TRUE	TRUE
CHS.32668.1	CHS.32668.6	C20orf96	328	363	0.9036	79.2	75.2	1.0532	1036	5824	Uterus	Fallopian_Tube	5.808848889	43.50665271	FALSE	FALSE
CHS.32668.10	CHS.32668.6	C20orf96	310	363	0.854	81.7	75.2	1.0864	7331	5824	Testis	Fallopian_Tube	18.25788985	43.50665271	FALSE	FALSE
CHS.32668.12	CHS.32668.6	C20orf96	261	363	0.719	85.3	75.2	1.1343	5847	5824	Testis	Fallopian_Tube	28.16599444	43.50665271	FALSE	FALSE
CHS.32712.1	CHS.32712.4	SDCBP2	207	292	0.7089	93.9	80.9	1.1607	9462	7125	Brain	Small_Intestine	6.837862093	111.3957825	TRUE	TRUE
CHS.32745.2	CHS.32745.5	STK35	401	534	0.7509	79.6	65.6	1.2134	8228	4684	Testis	Colon	37.35116621	8.162603577	TRUE	TRUE
CHS.3277.2	CHS.3277.1	FDPS	353	419	0.8425	94.1	84.6	1.1123	9794	8401	Bone_Marrow	Bone_Marrow	403.4285196	15.82006098	FALSE	FALSE
CHS.3277.4	CHS.3277.1	FDPS	248	419	0.5919	94.4	84.6	1.1158	9398	8401	Bone_Marrow	Bone_Marrow	1.362868931	15.82006098	FALSE	FALSE
CHS.328.6	CHS.328.7	TMEM201	392	666	0.5886	75	58	1.2931	8542	7623	Muscle	Bone_Marrow	25.17297833	10.86512758	TRUE	TRUE
CHS.32815.2	CHS.32815.34	PANK2	279	460	0.6065	91	69	1.3188	5953	0	Testis	-	3.611724348	0	TRUE	TRUE
CHS.32850.12	CHS.32850.13	TMEM230	120	183	0.6557	76.2	64.4	1.1832	9783	8149	Thyroid	Uterus	77.56556111	12.4378827	FALSE	FALSE
CHS.33206.23	CHS.33206.6	ABHD12	359	398	0.902	89.2	84.1	1.0606	34	9763	Esophagus	Thyroid	8.242	119.0230617	TRUE	TRUE
CHS.33267.4	CHS.33267.3	HM13	377	426	0.885	82.1	74	1.1095	9784	9670	Cervix_Uteri	Prostate	146.0841273	3.176600248	TRUE	TRUE
CHS.33289.49	CHS.33289.3	TTLL9	355	439	0.8087	83.2	78	1.0667	0	0	-	-	0	0	FALSE	FALSE
CHS.33289.52	CHS.33289.3	TTLL9	379	439	0.8633	85.2	78	1.0923	178	0	Lung	-	5.00212	0	FALSE	FALSE
CHS.33289.55	CHS.33289.3	TTLL9	378	439	0.861	83.9	78	1.0756	25	0	Nerve	-	3.187996667	0	FALSE	FALSE
CHS.33289.65	CHS.33289.3	TTLL9	436	439	0.9932	84.7	78	1.0859	72	0	Cervix_Uteri	-	13.2286	0	FALSE	FALSE
CHS.33289.75	CHS.33289.3	TTLL9	347	439	0.7904	86.1	78	1.1038	0	0	-	-	0	0	FALSE	FALSE
CHS.33289.76	CHS.33289.3	TTLL9	341	439	0.7768	83.6	78	1.0718	0	0	-	-	0	0	FALSE	FALSE
CHS.33289.8	CHS.33289.3	TTLL9	347	439	0.7904	86.5	78	1.109	754	0	Testis	-	4.981599398	0	FALSE	FALSE
CHS.33289.9	CHS.33289.3	TTLL9	230	439	0.5239	83.7	78	1.0731	158	0	Nerve	-	1.6474755	0	FALSE	FALSE
CHS.3337.8	CHS.3337.1	TTC24	489	582	0.8402	82.5	73.2	1.127	3	2	Pituitary	Pituitary	3.111243333	0.950063	FALSE	FALSE
CHS.33402.20	CHS.33402.3	SPAG4	312	437	0.714	85.4	69.3	1.2323	3186	1904	Pancreas	Testis	24.06194221	27.15858433	TRUE	TRUE
CHS.33455.3	CHS.33455.1	NNAT	54	81	0.6667	82	67.2	1.2202	7381	5622	Pituitary	Pituitary	1145.448549	838.7630341	TRUE	TRUE
CHS.33600.29	CHS.33600.40	PABPC1L	330	619	0.5331	90.9	77.4	1.1744	6156	0	Thyroid	-	37.04930872	0	FALSE	FALSE
CHS.33600.35	CHS.33600.40	PABPC1L	449	619	0.7254	82.3	77.4	1.0633	5	0	Thyroid	-	7.76304	0	FALSE	FALSE
CHS.33642.23	CHS.33642.20	WFDC3	137	231	0.5931	75.3	68.2	1.1041	309	201	Skin	Testis	2.154394122	9.301350474	FALSE	FALSE
CHS.33745.15	CHS.33745.13	STAU1	496	577	0.8596	70.5	66.8	1.0554	9774	9334	Thyroid	Muscle	40.0493525	14.8940024	FALSE	FALSE
CHS.34057.7	CHS.34057.11	CDH26	749	832	0.9002	77.4	73.3	1.0559	0	97	-	Esophagus	0	2.670673596	FALSE	FALSE
CHS.341.13	CHS.341.11	LZIC	176	190	0.9263	85.4	80.7	1.0582	97	9717	Pituitary	Uterus	1.63156	10.26012271	FALSE	FALSE
CHS.3440.12	CHS.3440.11	FCRL6	397	434	0.9147	78.5	73.9	1.0622	12	830	Blood	Prostate	1.445951417	1.8960275	FALSE	FALSE
CHS.34534.37	CHS.34534.2	GRIK1	865	949	0.9115	84.8	80.2	1.0574	0	744	-	Adrenal_Gland	0	2.403512222	TRUE	TRUE
CHS.34534.38	CHS.34534.2	GRIK1	880	949	0.9273	84.7	80.2	1.0561	0	744	-	Adrenal_Gland	0	2.403512222	TRUE	TRUE
CHS.34636.2	CHS.34636.3	IFNAR2	331	515	0.6427	74	58.1	1.2737	9630	8959	Bone_Marrow	Spleen	20.99328228	4.327426034	FALSE	FALSE
CHS.34682.21	CHS.34682.9	RUNX1	250	480	0.5208	72.7	54.2	1.3413	3787	2612	Lung	Muscle	3.102937745	9.478829875	FALSE	FALSE
CHS.34849.5	CHS.34849.4	PDE9A	533	593	0.8988	86.3	81.5	1.0589	7750	7622	Colon	Small_Intestine	25.70154842	99.65981487	FALSE	FALSE
CHS.34903.4	CHS.34903.1	RRP1	415	461	0.9002	78.5	73.8	1.0637	242	9766	Vagina	Bone_Marrow	2.78226	39.77931863	FALSE	FALSE
CHS.3497.12	CHS.3497.5	CD244	329	365	0.9014	72.6	68.2	1.0645	8	1307	Adipose_Tissue	Spleen	2.13249	13.81822897	FALSE	FALSE
CHS.34978.7	CHS.34978.3	SLX9	214	230	0.9304	74.7	70.3	1.0626	1277	9748	Bone_Marrow	Blood_Vessel	11.07414025	34.21039071	FALSE	FALSE
CHS.35043.2	CHS.35043.3	SPATC1L	186	340	0.5471	82.1	67.8	1.2109	9371	2414	Bone_Marrow	Testis	130.5037756	14.57145552	FALSE	FALSE
CHS.3507.21	CHS.3507.6	NECTIN4	460	510	0.902	81.7	77.8	1.0501	4	2286	Stomach	Skin	1.21557	149.1970177	TRUE	TRUE
CHS.35196.13	CHS.35196.1	MRPL40	162	206	0.7864	85.1	79.2	1.0745	9781	9778	Thyroid	Bone_Marrow	3.266511622	101.4906794	FALSE	TRUE
CHS.35226.22	CHS.35226.2	RANBP1	150	278	0.5396	85.6	72.2	1.1856	9643	9349	Bone_Marrow	Bone_Marrow	81.3389549	15.46815157	FALSE	FALSE
CHS.35226.8	CHS.35226.2	RANBP1	201	278	0.723	82.9	72.2	1.1482	9783	9349	Bone_Marrow	Bone_Marrow	435.9648431	15.46815157	FALSE	FALSE
CHS.35226.9	CHS.35226.2	RANBP1	200	278	0.7194	82.2	72.2	1.1385	9782	9349	Bone_Marrow	Bone_Marrow	226.5484451	15.46815157	FALSE	FALSE
CHS.35270.29	CHS.35270.4	LRRC74B	228	392	0.5816	90.9	84.5	1.0757	121	3	Cervix_Uteri	Lung	6.29306	2.63908	FALSE	FALSE
CHS.35332.5	CHS.35332.4	IGLL5	139	214	0.6495	83.7	69	1.213	4640	1414	Spleen	Kidney	241.9013617	3366.612155	FALSE	FALSE
CHS.35375.4	CHS.35375.3	DERL3	205	235	0.8723	89.6	81.7	1.0967	7266	5781	Spleen	Spleen	2.971862754	6.997486729	TRUE	TRUE
CHS.35534.14	CHS.35534.4	AP1B1	877	949	0.9241	83.9	77.9	1.077	0	7319	-	Brain	0	30.93226031	FALSE	FALSE
CHS.35651.1	CHS.35651.5	RFPL3	288	317	0.9085	88.7	83.8	1.0585	88	1478	Testis	Testis	1.418986702	2.621539663	FALSE	FALSE
CHS.35755.12	CHS.35755.9	KCTD17	213	314	0.6783	78.3	69.3	1.1299	8627	7028	Brain	Testis	20.28273968	20.62785847	TRUE	TRUE
CHS.35885.2	CHS.35885.4	SYNGR1	191	233	0.8197	87.6	77.8	1.126	9734	8627	Ovary	Brain	50.07637473	142.3464127	TRUE	TRUE
CHS.3592.11	CHS.3592.5	PBX1	347	430	0.807	75.2	67	1.1224	9260	9205	Uterus	Uterus	90.77263229	64.88192188	TRUE	TRUE
CHS.35937.7	CHS.35937.12	L3MBTL2	637	705	0.9035	76.3	71.9	1.0612	111	9685	Skin	Pituitary	3.29277	24.37861308	TRUE	TRUE
CHS.36016.2	CHS.36016.3	PACSIN2	445	486	0.9156	83.1	79	1.0519	7668	9776	Pituitary	Blood_Vessel	6.655925341	116.5329238	FALSE	FALSE
CHS.36181.11	CHS.36181.2	TAFA5	125	132	0.947	88.9	78.7	1.1296	6876	5389	Nerve	Brain	89.56301791	46.06626441	TRUE	TRUE
CHS.36460.7	CHS.36460.2	IL5RA	335	420	0.7976	89.4	83.7	1.0681	413	162	Prostate	Fallopian_Tube	1.410991667	15.131435	FALSE	FALSE
CHS.36460.9	CHS.36460.2	IL5RA	333	420	0.7929	89.6	83.7	1.0705	579	162	Vagina	Fallopian_Tube	0.817235	15.131435	FALSE	FALSE
CHS.36550.31	CHS.36550.63	TTLL3	574	815	0.7043	79.7	67.8	1.1755	3	2	Blood	Blood_Vessel	1.33188	1.21497	FALSE	TRUE
CHS.36550.44	CHS.36550.63	TTLL3	434	815	0.5325	75.6	67.8	1.115	1150	2	Cervix_Uteri	Blood_Vessel	22.8069	1.21497	TRUE	TRUE
CHS.36550.59	CHS.36550.63	TTLL3	531	815	0.6515	77.3	67.8	1.1401	8	2	Adipose_Tissue	Blood_Vessel	1.29637	1.21497	TRUE	TRUE
CHS.36550.60	CHS.36550.63	TTLL3	607	815	0.7448	80.4	67.8	1.1858	112	2	Testis	Blood_Vessel	8.8257	1.21497	TRUE	TRUE
CHS.36550.65	CHS.36550.63	TTLL3	613	815	0.7521	72.8	67.8	1.0737	4	2	Testis	Blood_Vessel	7.74728	1.21497	TRUE	TRUE
CHS.36550.66	CHS.36550.63	TTLL3	621	815	0.762	78	67.8	1.1504	10	2	Skin	Blood_Vessel	1.53717	1.21497	TRUE	TRUE
CHS.36550.67	CHS.36550.63	TTLL3	564	815	0.692	77.6	67.8	1.1445	17	2	Skin	Blood_Vessel	3.0674375	1.21497	TRUE	TRUE
CHS.36550.68	CHS.36550.63	TTLL3	622	815	0.7632	75.8	67.8	1.118	7	2	Testis	Blood_Vessel	6.319048	1.21497	FALSE	TRUE
CHS.36550.69	CHS.36550.63	TTLL3	578	815	0.7092	75.9	67.8	1.1195	5	2	Muscle	Blood_Vessel	1.31761	1.21497	TRUE	TRUE
CHS.36575.3	CHS.36575.1	IRAK2	576	625	0.9216	71.2	67.1	1.0611	544	6824	Spleen	Bladder	1.743514444	16.75566455	TRUE	TRUE
CHS.36606.1	CHS.36606.2	SYN2	478	582	0.8213	74.6	68.6	1.0875	3800	3765	Brain	Brain	84.85772018	16.17018702	TRUE	TRUE
CHS.36712.17	CHS.36712.1	OXNAD1	285	312	0.9135	91.4	85.4	1.0703	5873	9502	Testis	Bone_Marrow	1.982900931	5.387882277	FALSE	FALSE
CHS.36794.17	CHS.36794.9	RARB	336	448	0.75	84.7	77.5	1.0929	6797	0	Prostate	-	13.29569933	0	TRUE	TRUE
CHS.36794.18	CHS.36794.9	RARB	399	448	0.8906	83.1	77.5	1.0723	988	0	Testis	-	1.43004	0	TRUE	TRUE
CHS.36794.8	CHS.36794.9	RARB	405	448	0.904	82.4	77.5	1.0632	0	0	-	-	0	0	FALSE	TRUE
CHS.36930.11	CHS.36930.1	LRRFIP2	400	721	0.5548	81	67.3	1.2036	9683	990	Testis	Uterus	27.01003957	5.64758	FALSE	FALSE
CHS.36930.19	CHS.36930.1	LRRFIP2	458	721	0.6352	81.1	67.3	1.2051	1270	990	Skin	Uterus	33.6958	5.64758	FALSE	FALSE
CHS.36930.59	CHS.36930.1	LRRFIP2	424	721	0.5881	80.9	67.3	1.2021	9756	990	Blood_Vessel	Uterus	37.43554811	5.64758	FALSE	FALSE
CHS.36981.14	CHS.36981.1	SLC25A38	287	304	0.9441	82.2	77.8	1.0566	67	9793	Prostate	Thyroid	2.97315	69.21452022	FALSE	FALSE
CHS.36981.18	CHS.36981.1	SLC25A38	286	304	0.9408	82.4	77.8	1.0591	1049	9793	Testis	Thyroid	1.356466717	69.21452022	FALSE	FALSE
CHS.37012.14	CHS.37012.4	CTNNB1	720	781	0.9219	84.1	79.9	1.0526	281	9790	Heart	Cervix_Uteri	4.00414	168.9440818	TRUE	TRUE
CHS.37181.1	CHS.37181.2	KIF9	725	790	0.9177	78.2	73.2	1.0683	706	950	Testis	Testis	6.425909821	14.34417793	TRUE	TRUE
CHS.3729.1	CHS.3729.2	DNM3	555	863	0.6431	86.7	78.1	1.1101	2678	1213	Cervix_Uteri	Brain	1.15876625	24.92585342	TRUE	TRUE
CHS.37312.3	CHS.37312.7	RASSF1	270	340	0.7941	77.4	73.3	1.0559	9790	8922	Testis	Spleen	54.3026589	31.34343076	TRUE	TRUE
CHS.37350.1	CHS.37350.2	IQCF2	86	164	0.5244	95.3	86.1	1.1069	225	225	Testis	Testis	105.5108619	33.67988496	FALSE	FALSE
CHS.37354.3	CHS.37354.1	RRP9	431	475	0.9074	88.4	84	1.0524	986	9651	Uterus	Bone_Marrow	5.44974	33.62241127	TRUE	TRUE
CHS.37638.3	CHS.37638.4	PROK2	108	129	0.8372	82.1	73.7	1.114	2367	1632	Blood	Blood	82.69126904	55.61741905	TRUE	TRUE
CHS.37756.1	CHS.37756.2	EPHA3	539	983	0.5483	87.6	79.6	1.1005	3522	3268	Adrenal_Gland	Prostate	0.397547	20.46795049	TRUE	TRUE
CHS.37972.1	CHS.37972.3	CD96	402	569	0.7065	74.5	64.5	1.155	2545	1957	Thyroid	Bladder	1.32682644	3.773834333	TRUE	TRUE
CHS.37976.1	CHS.37976.2	PLCXD2	341	305	1.118	86.1	78.5	1.0968	1017	145	Brain	Spleen	3.739596723	0.6153145	FALSE	FALSE
CHS.37976.5	CHS.37976.2	PLCXD2	289	305	0.9475	85.5	78.5	1.0892	480	145	Pituitary	Spleen	1.234237389	0.6153145	FALSE	FALSE
CHS.37982.3	CHS.37982.13	TMPRSS7	717	843	0.8505	85.5	81.4	1.0504	26	0	Testis	-	1.105936154	0	FALSE	FALSE
CHS.37982.4	CHS.37982.13	TMPRSS7	706	843	0.8375	86.1	81.4	1.0577	3	0	Testis	-	1.587244667	0	FALSE	FALSE
CHS.38022.33	CHS.38022.6	CFAP44	982	1854	0.5297	84.2	74.9	1.1242	3147	2983	Cervix_Uteri	Fallopian_Tube	0.364668	8.745791429	FALSE	FALSE
CHS.38038.3	CHS.38038.4	DRD3	367	400	0.9175	77.4	71.8	1.078	1	246	Testis	Brain	0.058533	3.681023887	TRUE	TRUE
CHS.38173.18	CHS.38173.10	PARP15	375	678	0.5531	85	80.3	1.0585	4201	938	Spleen	Spleen	2.177450568	5.27457901	FALSE	FALSE
CHS.38190.25	CHS.38190.11	MYLK	991	1914	0.5178	70.4	64	1.1	2205	365	Colon	Esophagus	35.82101591	163.2010246	FALSE	FALSE
CHS.38190.43	CHS.38190.11	MYLK	992	1914	0.5183	70.9	64	1.1078	6175	365	Colon	Esophagus	486.474234	163.2010246	TRUE	FALSE
CHS.38194.7	CHS.38194.8	ROPN1	120	212	0.566	91	85.2	1.0681	1063	228	Breast	Testis	9.733539872	144.1154041	TRUE	TRUE
CHS.38356.2	CHS.38356.1	ALG1L2	120	215	0.5581	79.7	72.2	1.1039	76	10	Breast	Spleen	2.61979	1.580688222	FALSE	FALSE
CHS.38435.1	CHS.38435.18	CEP63	495	703	0.7041	87	78	1.1154	9545	7512	Bladder	Testis	6.765011818	28.09495238	FALSE	FALSE
CHS.38435.15	CHS.38435.18	CEP63	541	703	0.7696	86.7	78	1.1115	9391	7512	Ovary	Testis	3.017596171	28.09495238	FALSE	FALSE
CHS.38435.36	CHS.38435.18	CEP63	475	703	0.6757	85.3	78	1.0936	9297	7512	Muscle	Testis	5.911836896	28.09495238	FALSE	FALSE
CHS.38483.10	CHS.38483.9	FAIM	179	201	0.8905	92.8	87.6	1.0594	9457	1449	Fallopian_Tube	Bladder	20.56645286	3.49953	FALSE	FALSE
CHS.38508.1	CHS.38508.5	NMNAT3	215	346	0.6214	85.8	77.5	1.1071	4420	2960	Skin	Bladder	1.163164249	1.951705	FALSE	FALSE
CHS.38508.14	CHS.38508.5	NMNAT3	252	346	0.7283	88.7	77.5	1.1445	8080	2960	Skin	Bladder	7.361348723	1.951705	FALSE	FALSE
CHS.38799.20	CHS.38799.2	MLF1	194	283	0.6855	76.5	64.4	1.1879	4613	902	Testis	Heart	7.951137828	28.86748781	TRUE	TRUE
CHS.38799.23	CHS.38799.2	MLF1	223	283	0.788	72	64.4	1.118	1470	902	Testis	Heart	4.241324	28.86748781	TRUE	TRUE
CHS.38811.27	CHS.38811.1	SCHIP1	244	487	0.501	74.1	57.1	1.2977	7496	1248	Brain	Brain	58.27522586	10.98335364	TRUE	TRUE
CHS.38811.32	CHS.38811.1	SCHIP1	260	487	0.5339	72.9	57.1	1.2767	2949	1248	Muscle	Brain	57.52461523	10.98335364	TRUE	TRUE
CHS.38981.2	CHS.38981.4	ECT2	854	914	0.9344	73.2	66.1	1.1074	9	2428	Blood	Skin	1.47572	4.628803419	FALSE	TRUE
CHS.38981.6	CHS.38981.4	ECT2	929	914	1.0164	70.5	66.1	1.0666	1	2428	Brain	Skin	1.55444	4.628803419	TRUE	TRUE
CHS.39044.8	CHS.39044.7	KCNMB3	257	275	0.9345	75.7	71	1.0662	7572	8844	Prostate	Bone_Marrow	1.580434784	3.174590275	TRUE	TRUE
CHS.39070.1	CHS.39070.2	TTC14	439	770	0.5701	86.4	64.3	1.3437	9614	9447	Thyroid	Fallopian_Tube	60.45992659	6.78401	TRUE	TRUE
CHS.39075.7	CHS.39075.6	FXR1	539	621	0.868	74.3	68.2	1.0894	9788	9779	Adrenal_Gland	Testis	5.143640888	43.6242687	TRUE	TRUE
CHS.39199.2	CHS.39199.1	KNG1	427	644	0.663	78.9	62.3	1.2665	351	351	Liver	Liver	394.0076036	196.4736159	TRUE	TRUE
CHS.39269.13	CHS.39269.10	TP63	393	680	0.5779	74.2	60.7	1.2224	919	837	Ovary	Muscle	3.39635	4.078086396	TRUE	TRUE
CHS.39269.35	CHS.39269.10	TP63	416	680	0.6118	71.1	60.7	1.1713	919	837	Ovary	Muscle	1.65257	4.078086396	TRUE	TRUE
CHS.39295.3	CHS.39295.2	CCDC50	306	482	0.6349	73.7	61.3	1.2023	9762	6287	Adipose_Tissue	Thyroid	37.64660176	13.51626195	TRUE	TRUE
CHS.39787.5	CHS.39787.7	CRMP1	572	686	0.8338	89.6	81.1	1.1048	4416	2120	Pituitary	Brain	98.03828462	19.125969	FALSE	FALSE
CHS.39815.18	CHS.39815.6	TBC1D14	413	693	0.596	87.2	64	1.3625	9477	9168	Skin	Spleen	14.91103675	36.5861794	TRUE	TRUE
CHS.3983.1	CHS.3983.3	PDC	194	246	0.7886	81.3	77.2	1.0531	17	11	Breast	Skin	0.291318	0.372696571	FALSE	FALSE
CHS.39970.7	CHS.39970.4	BST1	289	318	0.9088	91.9	87.2	1.0539	4840	8033	Blood	Blood	9.750875206	44.93151515	FALSE	FALSE
CHS.39989.13	CHS.39989.3	LDB2	348	373	0.933	74.5	70.5	1.0567	2	8710	Adipose_Tissue	Uterus	1.04316	30.24051458	TRUE	TRUE
CHS.39989.32	CHS.39989.3	LDB2	349	373	0.9357	74.7	70.5	1.0596	3	8710	Lung	Uterus	2.64662	30.24051458	TRUE	TRUE
CHS.40025.11	CHS.40025.15	KCNIP4	229	250	0.916	73	68.8	1.061	1252	1465	Thyroid	Skin	4.511223552	39.7955	TRUE	TRUE
CHS.40025.13	CHS.40025.15	KCNIP4	225	250	0.9	74.1	68.8	1.077	608	1465	Colon	Skin	3.345450339	39.7955	TRUE	TRUE
CHS.40224.13	CHS.40224.17	KLHL5	568	709	0.8011	86	79.9	1.0763	9279	8378	Bladder	Brain	16.93370818	2.877490832	TRUE	TRUE
CHS.40331.7	CHS.40331.2	CORIN	975	1042	0.9357	74.4	70.1	1.0613	9	1374	Spleen	Heart	4.17867	13.45555737	TRUE	TRUE
CHS.40462.10	CHS.40462.4	HOPX	73	91	0.8022	79.4	71.3	1.1136	8715	4122	Prostate	Cervix_Uteri	18.28390582	91.68655	FALSE	FALSE
CHS.40468.11	CHS.40468.9	SPINK2	84	134	0.6269	83.9	69.7	1.2037	2944	1970	Testis	Testis	207.3231578	108.044031	TRUE	TRUE
CHS.40558.11	CHS.40558.4	UGT2A1	483	527	0.9165	92.8	87.6	1.0594	192	13	Pituitary	Pituitary	1.088155433	1.7212933	TRUE	FALSE
CHS.40558.3	CHS.40558.4	UGT2A1	527	527	1	93.8	87.6	1.0708	71	13	Pituitary	Pituitary	4.86789275	1.7212933	FALSE	FALSE
CHS.40589.29	CHS.40589.26	RUFY3	567	620	0.9145	80.3	76.1	1.0552	2895	9355	Thyroid	Pituitary	10.09426618	26.40987438	TRUE	TRUE
CHS.40700.6	CHS.40700.9	NUP54	459	507	0.9053	79.8	75.5	1.057	4235	9598	Bone_Marrow	Bone_Marrow	3.660066549	52.64867255	TRUE	TRUE
CHS.4081.21	CHS.4081.12	DENND1B	426	775	0.5497	89	64.2	1.3863	1894	1788	Brain	Small_Intestine	0.678461291	4.933414281	TRUE	TRUE
CHS.40815.11	CHS.40815.29	COQ2	328	371	0.8841	82.3	77.7	1.0592	1301	0	Cervix_Uteri	-	2.25622	0	FALSE	TRUE
CHS.40815.15	CHS.40815.29	COQ2	421	371	1.1348	77.7	77.7	1	9607	0	Adrenal_Gland	-	18.55727267	0	TRUE	TRUE
CHS.40815.23	CHS.40815.29	COQ2	298	371	0.8032	91.7	77.7	1.1802	54	0	Breast	-	2.04964	0	TRUE	TRUE
CHS.40815.27	CHS.40815.29	COQ2	260	371	0.7008	88	77.7	1.1326	136	0	Prostate	-	1.46635	0	TRUE	TRUE
CHS.41089.8	CHS.41089.2	MCUB	307	336	0.9137	75.2	70.7	1.0636	378	8921	Nerve	Adipose_Tissue	2.68762675	16.93602439	TRUE	TRUE
CHS.4110.13	CHS.4110.1	NR5A2	469	541	0.8669	77.7	71.5	1.0867	1585	386	Pancreas	Pancreas	5.433791272	5.683152275	TRUE	TRUE
CHS.4110.2	CHS.4110.1	NR5A2	495	541	0.915	75.3	71.5	1.0531	597	386	Pancreas	Pancreas	7.952942222	5.683152275	TRUE	TRUE
CHS.41135.27	CHS.41135.19	CAMK2D	478	533	0.8968	86.6	81.5	1.0626	9277	1751	Adipose_Tissue	Pituitary	19.98652098	8.0566	FALSE	FALSE
CHS.41135.30	CHS.41135.19	CAMK2D	492	533	0.9231	85.7	81.5	1.0515	1287	1751	Brain	Pituitary	25.4110201	8.0566	FALSE	FALSE
CHS.41135.37	CHS.41135.19	CAMK2D	489	533	0.9174	85.6	81.5	1.0503	44	1751	Blood_Vessel	Pituitary	4.05624	8.0566	FALSE	FALSE
CHS.41135.54	CHS.41135.19	CAMK2D	478	533	0.8968	85.8	81.5	1.0528	9266	1751	Lung	Pituitary	2.163066256	8.0566	FALSE	FALSE
CHS.41245.1	CHS.41245.2	TRPC3	848	921	0.9207	78.5	74.1	1.0594	1242	762	Pituitary	Stomach	6.288200465	5.75581	TRUE	TRUE
CHS.41329.16	CHS.41329.2	JADE1	509	842	0.6045	74.5	60.3	1.2355	9095	9011	Thyroid	Thyroid	9.855721154	17.12052858	TRUE	TRUE
CHS.41632.2	CHS.41632.3	RBM46	485	533	0.9099	78.3	72.8	1.0755	217	207	Testis	Testis	11.33315945	2.30621261	TRUE	TRUE
CHS.41729.5	CHS.41729.1	TRIM61	471	209	2.2536	86.1	86	1.0012	4760	173	Testis	Ovary	7.60596698	1.85748	FALSE	FALSE
CHS.42006.5	CHS.42006.6	PDLIM3	276	364	0.7582	71.6	65.3	1.0965	6461	5764	Muscle	Muscle	80.33181022	1016.36796	TRUE	TRUE
CHS.42393.10	CHS.42393.3	FBXL7	444	491	0.9043	85.6	81.5	1.0503	545	8183	Nerve	Uterus	3.793495219	37.15155417	TRUE	TRUE
CHS.42523.2	CHS.42523.1	CDH6	663	790	0.8392	84	78.6	1.0687	4536	4444	Kidney	Kidney	5.937135355	11.58668258	TRUE	TRUE
CHS.4253.12	CHS.4253.7	GOLT1A	130	132	0.9848	80.3	76.4	1.051	141	4034	Liver	Liver	42.43998125	96.64288986	TRUE	TRUE
CHS.4253.15	CHS.4253.7	GOLT1A	123	132	0.9318	80.9	76.4	1.0589	1004	4034	Liver	Liver	24.46608737	96.64288986	TRUE	TRUE
CHS.42565.1	CHS.42565.2	C1QTNF3	246	319	0.7712	79	68.5	1.1533	6363	5846	Esophagus	Esophagus	5.840963684	5.925006898	TRUE	TRUE
CHS.42606.4	CHS.42606.7	LMBRD2	637	695	0.9165	79.8	75.9	1.0514	322	6372	Nerve	Brain	2.495501091	8.537606077	FALSE	FALSE
CHS.42854.4	CHS.42854.5	IL31RA	582	764	0.7618	76	72	1.0556	281	258	Blood_Vessel	Blood_Vessel	0.433824153	1.367276614	FALSE	FALSE
CHS.42930.11	CHS.42930.15	PDE4D	673	809	0.8319	72.8	64.1	1.1357	2282	1482	Muscle	Brain	14.78756931	1.782722237	TRUE	TRUE
CHS.42930.4	CHS.42930.15	PDE4D	518	809	0.6403	78.7	64.1	1.2278	1789	1482	Brain	Brain	1.34849035	1.782722237	TRUE	TRUE
CHS.42930.5	CHS.42930.15	PDE4D	507	809	0.6267	80	64.1	1.248	4905	1482	Skin	Brain	3.626333684	1.782722237	TRUE	TRUE
CHS.42930.6	CHS.42930.15	PDE4D	585	809	0.7231	75.8	64.1	1.1825	6951	1482	Muscle	Brain	4.11462956	1.782722237	TRUE	TRUE
CHS.42930.7	CHS.42930.15	PDE4D	679	809	0.8393	72.4	64.1	1.1295	4109	1482	Blood_Vessel	Brain	6.500572349	1.782722237	TRUE	TRUE
CHS.42930.8	CHS.42930.15	PDE4D	687	809	0.8492	71.9	64.1	1.1217	2360	1482	Muscle	Brain	28.81765877	1.782722237	TRUE	TRUE
CHS.43067.20	CHS.43067.19	CCDC125	386	511	0.7554	73.5	66.5	1.1053	4987	2285	Bone_Marrow	Cervix_Uteri	2.94789219	3.32551	FALSE	FALSE
CHS.43067.37	CHS.43067.19	CCDC125	467	511	0.9139	70.6	66.5	1.0617	198	2285	Nerve	Cervix_Uteri	3.9559	3.32551	FALSE	FALSE
CHS.43079.1	CHS.43079.2	SERF1B	62	110	0.5636	79.7	61	1.3066	9776	9764	Testis	Brain	102.2299899	11.13216295	FALSE	FALSE
CHS.43155.2	CHS.43155.1	BTF3	162	206	0.7864	76.6	69.7	1.099	9794	9793	Ovary	Ovary	893.5229821	196.6595866	FALSE	FALSE
CHS.43203.1	CHS.43203.2	F2RL2	352	374	0.9412	78.8	74.1	1.0634	556	3661	Uterus	Breast	1.2662373	3.785433209	TRUE	TRUE
CHS.4321.2	CHS.4321.10	SRGAP2	790	1071	0.7376	84.2	71.7	1.1743	1904	8	Nerve	Testis	7.126301811	2.6825864	TRUE	TRUE
CHS.4321.3	CHS.4321.10	SRGAP2	841	1071	0.7852	81.3	71.7	1.1339	11	8	Testis	Testis	1.319838857	2.6825864	TRUE	TRUE
CHS.4321.4	CHS.4321.10	SRGAP2	789	1071	0.7367	84.4	71.7	1.1771	9466	8	Nerve	Testis	35.04702065	2.6825864	FALSE	TRUE
CHS.4321.45	CHS.4321.10	SRGAP2	836	1071	0.7806	81.3	71.7	1.1339	3676	8	Nerve	Testis	5.721639636	2.6825864	TRUE	TRUE
CHS.4321.46	CHS.4321.10	SRGAP2	832	1071	0.7768	81.5	71.7	1.1367	157	8	Adipose_Tissue	Testis	9.980275	2.6825864	FALSE	TRUE
CHS.4321.48	CHS.4321.10	SRGAP2	833	1071	0.7778	81.1	71.7	1.1311	162	8	Brain	Testis	32.58507071	2.6825864	TRUE	TRUE
CHS.43219.5	CHS.43219.15	PDE8B	805	885	0.9096	78.4	73.7	1.0638	207	5049	Adipose_Tissue	Thyroid	9.272719651	56.795496	TRUE	TRUE
CHS.43252.82	CHS.43252.22	TENT2	450	484	0.9298	78.9	74.4	1.0605	1	9691	Blood	Bone_Marrow	0.181816	18.94922843	TRUE	TRUE
CHS.43258.4	CHS.43258.5	MTX3	248	312	0.7949	89.4	84.3	1.0605	5503	3904	Thyroid	Brain	4.790132178	4.769272309	TRUE	TRUE
CHS.4328.9	CHS.4328.1	RASSF5	265	418	0.634	80.1	68.8	1.1642	8619	7130	Blood	Salivary_Gland	58.20257842	28.778843	TRUE	TRUE
CHS.43437.6	CHS.43437.18	MCTP1	692	999	0.6927	76.7	64	1.1984	4098	2033	Adipose_Tissue	Brain	2.387250288	3.122848948	FALSE	FALSE
CHS.43437.7	CHS.43437.18	MCTP1	778	999	0.7788	75.1	64	1.1734	5743	2033	Adipose_Tissue	Brain	12.28889729	3.122848948	FALSE	FALSE
CHS.43443.29	CHS.43443.11	FAM81B	288	452	0.6372	85.2	74.9	1.1375	362	193	Fallopian_Tube	Testis	11.0958	88.93416048	TRUE	TRUE
CHS.43449.1	CHS.43449.3	RFESD	157	210	0.7476	89.1	77.2	1.1541	7007	5514	Bone_Marrow	Bone_Marrow	4.834793	9.12970902	FALSE	FALSE
CHS.43527.11	CHS.43527.70	PAM	866	973	0.89	74.1	68.4	1.0833	9565	6737	Adrenal_Gland	Blood_Vessel	30.7657622	84.97407699	FALSE	FALSE
CHS.43527.117	CHS.43527.70	PAM	884	973	0.9085	74.4	68.4	1.0877	176	6737	Blood_Vessel	Blood_Vessel	5.986497813	84.97407699	FALSE	FALSE
CHS.43527.51	CHS.43527.70	PAM	883	973	0.9075	74.7	68.4	1.0921	150	6737	Blood_Vessel	Blood_Vessel	5.552268673	84.97407699	FALSE	FALSE
CHS.43625.4	CHS.43625.3	DCP2	385	420	0.9167	70.6	67	1.0537	2593	7297	Bone_Marrow	Bone_Marrow	3.051202863	33.3733451	TRUE	TRUE
CHS.43700.3	CHS.43700.17	TNFAIP8	188	198	0.9495	91.9	87.5	1.0503	8633	7844	Spleen	Spleen	35.21769746	6.098027203	TRUE	TRUE
CHS.43754.10	CHS.43754.8	CSNK1G3	416	456	0.9123	78	73.2	1.0656	2570	905	Bone_Marrow	Nerve	4.529979951	3.075287034	TRUE	TRUE
CHS.43754.13	CHS.43754.8	CSNK1G3	415	456	0.9101	77.9	73.2	1.0642	2247	905	Bone_Marrow	Nerve	5.096132174	3.075287034	TRUE	TRUE
CHS.43754.16	CHS.43754.8	CSNK1G3	311	456	0.682	77.8	73.2	1.0628	3268	905	Bladder	Nerve	0.565679	3.075287034	TRUE	TRUE
CHS.43812.13	CHS.43812.11	CCDC192	263	273	0.9634	82.2	77.8	1.0566	17	350	Skin	Testis	2.26994	19.24063946	FALSE	FALSE
CHS.43902.30	CHS.43902.4	SEPTIN8	440	483	0.911	79.5	75.5	1.053	7090	9104	Brain	Brain	15.65606869	105.3114977	TRUE	TRUE
CHS.43902.37	CHS.43902.4	SEPTIN8	442	483	0.9151	79.6	75.5	1.0543	7164	9104	Brain	Brain	27.88565384	105.3114977	TRUE	TRUE
CHS.43902.38	CHS.43902.4	SEPTIN8	429	483	0.8882	81	75.5	1.0728	9386	9104	Bone_Marrow	Brain	56.20211089	105.3114977	TRUE	TRUE
CHS.44126.2	CHS.44126.3	SRA1	162	224	0.7232	76.3	71.6	1.0656	9794	9783	Pituitary	Bone_Marrow	6.166466469	25.29235098	TRUE	TRUE
CHS.44143.3	CHS.44143.1	PCDHAC2	884	1007	0.8779	76.8	71.9	1.0682	8768	4705	Thyroid	Brain	0.105715227	3.925033434	TRUE	TRUE
CHS.44144.1	CHS.44144.2	PCDHA1	807	950	0.8495	80.5	72.8	1.1058	7460	898	Testis	Skin	1.5857057	3.60291	TRUE	TRUE
CHS.44145.1	CHS.44145.2	PCDHA9	842	950	0.8863	77.9	72.1	1.0804	8244	1391	Bladder	Testis	5.683652417	1.691392822	TRUE	TRUE
CHS.44147.1	CHS.44147.2	PCDHA8	814	950	0.8568	79.8	72.7	1.0977	7364	934	Liver	Spleen	3.525096729	1.651305	TRUE	TRUE
CHS.44150.2	CHS.44150.3	PCDHA13	807	950	0.8495	80.1	72.5	1.1048	7320	2331	Testis	Brain	0.193105933	1.147966223	TRUE	TRUE
CHS.44152.2	CHS.44152.3	PCDHA7	789	937	0.842	81.4	73.5	1.1075	8841	957	Testis	Brain	3.083494415	1.51108098	TRUE	TRUE
CHS.44153.1	CHS.44153.2	PCDHA12	792	941	0.8417	81.4	73.3	1.1105	7775	2640	Testis	Nerve	0.293831327	2.238927145	FALSE	FALSE
CHS.44155.1	CHS.44155.3	PCDHA2	824	948	0.8692	79.2	72.6	1.0909	8440	1312	Pituitary	Pituitary	1.182235397	1.557263575	TRUE	TRUE
CHS.44189.1	CHS.44189.2	PCDHGB5	818	923	0.8862	80.2	74.6	1.0751	9729	9112	Skin	Skin	0.367048524	12.76190103	TRUE	TRUE
CHS.44192.1	CHS.44192.2	PCDHGB7	808	929	0.8698	80.7	74.4	1.0847	9841	9153	Bladder	Lung	45.41825331	18.10203095	TRUE	TRUE
CHS.44194.1	CHS.44194.2	PCDHGB2	811	931	0.8711	80.8	74.3	1.0875	9654	8274	Bone_Marrow	Brain	0.434204637	9.248899811	TRUE	TRUE
CHS.44195.1	CHS.44195.2	PCDHGA10	850	936	0.9081	78.1	73.8	1.0583	1	8514	Liver	Brain	2.41877	6.311378975	TRUE	TRUE
CHS.44197.1	CHS.44197.3	PCDHGA3	829	932	0.8895	79.3	74.1	1.0702	9573	8616	Bone_Marrow	Brain	0.255851667	10.67829605	TRUE	TRUE
CHS.44199.1	CHS.44199.2	PCDHGB3	814	929	0.8762	80.5	74.3	1.0834	9535	7969	Ovary	Nerve	0.265156018	2.464886108	TRUE	FALSE
CHS.44200.1	CHS.44200.2	PCDHGA4	851	962	0.8846	79	73.5	1.0748	9585	8650	Bone_Marrow	Brain	0.287558176	6.488426362	TRUE	TRUE
CHS.44201.1	CHS.44201.2	PCDHGA11	837	935	0.8952	79.5	74	1.0743	9635	8905	Skin	Skin	0.545704572	4.563935964	TRUE	TRUE
CHS.44202.1	CHS.44202.2	PCDHGA9	828	932	0.8884	80	74.5	1.0738	9698	8681	Testis	Brain	0.295250761	10.19535776	TRUE	TRUE
CHS.44203.1	CHS.44203.2	PCDHGB1	810	927	0.8738	80.4	74.3	1.0821	9472	5549	Bladder	Brain	0.403955636	6.693382468	TRUE	TRUE
CHS.44204.1	CHS.44204.2	PCDHGA7	817	932	0.8766	80.1	74.2	1.0795	9668	8612	Ovary	Uterus	0.390644062	3.162445531	TRUE	TRUE
CHS.44209.1	CHS.44209.2	PCDHGA12	820	932	0.8798	80.6	74.4	1.0833	9669	8904	Liver	Skin	0.110477007	9.816507905	TRUE	TRUE
CHS.44311.6	CHS.44311.10	DPYSL3	570	684	0.8333	89.8	80.9	1.11	8849	8591	Blood_Vessel	Uterus	147.548215	83.86521146	TRUE	TRUE
CHS.44334.10	CHS.44334.14	HTR4	360	388	0.9278	82.6	76.8	1.0755	13	602	Adrenal_Gland	Brain	0.345325	3.065074683	FALSE	FALSE
CHS.44334.15	CHS.44334.14	HTR4	371	388	0.9562	82.5	76.8	1.0742	66	602	Colon	Brain	0.597548211	3.065074683	FALSE	FALSE
CHS.44451.5	CHS.44451.3	GLRA1	307	449	0.6837	87.6	83.4	1.0504	74	73	Brain	Brain	2.199259135	1.034974859	FALSE	TRUE
CHS.4463.6	CHS.4463.3	NEK2	384	445	0.8629	82	77.7	1.0553	2295	2235	Bone_Marrow	Bone_Marrow	7.531892059	57.36706667	TRUE	TRUE
CHS.44692.6	CHS.44692.5	NPM1	265	294	0.9014	75.1	69.9	1.0744	9786	9794	Cervix_Uteri	Bone_Marrow	27.44891091	1760.725392	FALSE	FALSE
CHS.44706.11	CHS.44706.8	FBXW11	508	563	0.9023	86.9	82	1.0598	9200	110	Uterus	Pituitary	11.8242699	2.60406	FALSE	FALSE
CHS.44706.4	CHS.44706.8	FBXW11	510	563	0.9059	86.9	82	1.0598	793	110	Nerve	Pituitary	3.591927	2.60406	FALSE	FALSE
CHS.44706.5	CHS.44706.8	FBXW11	510	563	0.9059	87.4	82	1.0659	8458	110	Brain	Pituitary	9.030141305	2.60406	FALSE	FALSE
CHS.44915.7	CHS.44915.3	CLK4	445	481	0.9252	82.1	77.7	1.0566	4713	9743	Nerve	Uterus	8.811439091	31.33664	TRUE	TRUE
CHS.44938.11	CHS.44938.7	RUFY1	600	708	0.8475	80.3	75	1.0707	9781	9640	Pituitary	Spleen	20.41275008	40.97491949	TRUE	TRUE
CHS.44962.6	CHS.44962.5	MAPK9	382	424	0.9009	85.9	80.9	1.0618	9505	9577	Brain	Bladder	11.44722513	9.853329636	TRUE	TRUE
CHS.44962.8	CHS.44962.5	MAPK9	382	424	0.9009	85.7	80.9	1.0593	3712	9577	Brain	Bladder	9.889681942	9.853329636	TRUE	TRUE
CHS.44996.1	CHS.44996.6	TRIM7	329	511	0.6438	89.9	84.9	1.0589	7891	7274	Testis	Muscle	1.64246057	26.83246082	TRUE	TRUE
CHS.4517.7	CHS.4517.5	VASH2	290	355	0.8169	83.3	76.8	1.0846	424	325	Blood	Blood	6.506587687	6.7132605	TRUE	TRUE
CHS.4517.8	CHS.4517.5	VASH2	251	355	0.707	83.2	76.8	1.0833	467	325	Cervix_Uteri	Blood	2.40915	6.7132605	TRUE	TRUE
CHS.45442.6	CHS.45442.11	SIRT5	202	310	0.6516	93.4	88.6	1.0542	8558	7654	Prostate	Liver	2.177519622	4.176252164	FALSE	FALSE
CHS.45850.5	CHS.45850.7	HLA-F	346	442	0.7828	89.4	81.5	1.0969	9683	8652	Spleen	Spleen	102.8437831	9.843550847	FALSE	FALSE
CHS.45850.6	CHS.45850.7	HLA-F	254	442	0.5747	86	81.5	1.0552	9009	8652	Spleen	Spleen	2.258846059	9.843550847	FALSE	FALSE
CHS.45902.1	CHS.45902.7	ATAT1	323	409	0.7897	72.4	61.7	1.1734	9388	7293	Pituitary	Testis	16.88000708	5.241538712	TRUE	TRUE
CHS.45902.3	CHS.45902.7	ATAT1	300	409	0.7335	75	61.7	1.2156	8290	7293	Pituitary	Testis	7.184261131	5.241538712	TRUE	TRUE
CHS.45902.5	CHS.45902.7	ATAT1	248	409	0.6064	81.7	61.7	1.3241	7945	7293	Testis	Testis	8.676129845	5.241538712	TRUE	TRUE
CHS.45940.16	CHS.45940.2	CCHCR1	782	871	0.8978	79.9	74.8	1.0682	9494	8673	Bone_Marrow	Testis	16.3543318	100.3590579	FALSE	TRUE
CHS.45972.2	CHS.45972.1	NCR3	177	201	0.8806	86.6	80.7	1.0731	2100	1798	Spleen	Spleen	10.68484721	8.553333009	FALSE	FALSE
CHS.46090.4	CHS.46090.3	VPS52	656	723	0.9073	89.9	85.4	1.0527	5169	9756	Testis	Bone_Marrow	3.808430912	57.05746569	TRUE	TRUE
CHS.46093.5	CHS.46093.6	WDR46	556	610	0.9115	85.8	80.8	1.0619	0	9769	-	Bone_Marrow	0	52.01081176	TRUE	TRUE
CHS.46101.13	CHS.46101.12	PHF1	419	567	0.739	77.6	68.4	1.1345	9781	9780	Testis	Fallopian_Tube	224.495244	44.87302857	TRUE	TRUE
CHS.46102.6	CHS.46102.3	CUTA	156	179	0.8715	82	77	1.0649	9793	9788	Pituitary	Pituitary	100.5966852	182.4758215	FALSE	FALSE
CHS.46177.5	CHS.46177.3	PPARD	402	441	0.9116	85	80.2	1.0599	4441	9743	Ovary	Thyroid	0.906069108	48.19106177	TRUE	TRUE
CHS.46183.10	CHS.46183.2	TULP1	349	542	0.6439	77.9	62.1	1.2544	22	7	Pituitary	Uterus	2.57564	1.6865005	TRUE	FALSE
CHS.46217.7	CHS.46217.2	PXT1	83	134	0.6194	81.1	66.2	1.2251	440	15	Testis	Testis	3.830646564	4.300219417	TRUE	FALSE
CHS.46252.11	CHS.46252.1	PIM1	296	313	0.9457	81.3	74.4	1.0927	1763	0	Fallopian_Tube	-	18.6463	0	TRUE	TRUE
CHS.46252.16	CHS.46252.1	PIM1	404	313	1.2907	74.4	74.4	1	9756	0	Bone_Marrow	-	420.4902157	0	TRUE	TRUE
CHS.46300.2	CHS.46300.7	MOCS1	385	636	0.6053	86.2	78.5	1.0981	9171	8138	Testis	Breast	1.224974607	10.56828781	TRUE	TRUE
CHS.46300.4	CHS.46300.7	MOCS1	385	636	0.6053	85.7	78.5	1.0917	9124	8138	Adipose_Tissue	Breast	41.7355077	10.56828781	TRUE	TRUE
CHS.46319.7	CHS.46319.8	TREML1	199	311	0.6399	78	65.7	1.1872	1255	998	Blood	Muscle	18.33298383	15.2243	TRUE	TRUE
CHS.46418.4	CHS.46418.5	YIPF3	315	350	0.9	74.6	69.4	1.0749	5866	9792	Prostate	Adrenal_Gland	17.43569028	154.5232062	TRUE	TRUE
CHS.46539.1	CHS.46539.2	DEFB110	62	67	0.9254	81.9	77.7	1.0541	3	2	Skin	Thyroid	0.640797	0.160568	TRUE	TRUE
CHS.46544.2	CHS.46544.1	TFAP2D	305	452	0.6748	74.5	60.9	1.2233	20	4	Brain	Brain	1.6538155	1.11585425	TRUE	TRUE
CHS.4662.24	CHS.4662.2	SUSD4	290	490	0.5918	75.5	69.6	1.0848	5346	4711	Vagina	Ovary	8.13162779	33.71224144	FALSE	TRUE
CHS.46865.3	CHS.46865.1	RIPPLY2	70	128	0.5469	72.2	59.7	1.2094	4348	1763	Brain	Brain	14.5653943	1.578781408	TRUE	FALSE
CHS.4689.2	CHS.4689.40	WDR26	661	761	0.8686	77.3	70.8	1.0918	9784	0	Bone_Marrow	-	36.1937951	0	TRUE	TRUE
CHS.4689.28	CHS.4689.40	WDR26	513	761	0.6741	85.4	70.8	1.2062	26	0	Adipose_Tissue	-	3.14818	0	TRUE	TRUE
CHS.4689.8	CHS.4689.40	WDR26	660	761	0.8673	76.5	70.8	1.0805	339	0	Nerve	-	4.400657583	0	TRUE	TRUE
CHS.46890.2	CHS.46890.20	SYNCRIP	561	623	0.9005	73.9	70.1	1.0542	4116	9782	Bone_Marrow	Skin	5.782098404	21.67426759	FALSE	FALSE
CHS.46890.6	CHS.46890.20	SYNCRIP	562	623	0.9021	74	70.1	1.0556	9782	9782	Bone_Marrow	Skin	52.8693451	21.67426759	FALSE	FALSE
CHS.46923.1	CHS.46923.4	CNR1	439	472	0.9301	72.5	68.9	1.0522	3174	6222	Pituitary	Adipose_Tissue	1.42136503	11.25066106	TRUE	TRUE
CHS.4739.2	CHS.4739.27	LIN9	523	542	0.9649	74.2	69.9	1.0615	4104	0	Bone_Marrow	-	4.201073657	0	TRUE	TRUE
CHS.4739.22	CHS.4739.27	LIN9	449	542	0.8284	78.8	69.9	1.1273	0	0	-	-	0	0	TRUE	TRUE
CHS.4739.6	CHS.4739.27	LIN9	524	542	0.9668	73.8	69.9	1.0558	206	0	Kidney	-	2.03575	0	TRUE	TRUE
CHS.4739.7	CHS.4739.27	LIN9	490	542	0.9041	75.6	69.9	1.0815	692	0	Testis	-	2.252561828	0	TRUE	TRUE
CHS.47520.4	CHS.47520.7	SGK1	431	526	0.8194	79.3	71.7	1.106	9745	3538	Vagina	Ovary	171.4732129	117.194979	TRUE	TRUE
CHS.47520.5	CHS.47520.7	SGK1	445	526	0.846	78.1	71.7	1.0893	9235	3538	Adipose_Tissue	Ovary	25.50772871	117.194979	TRUE	TRUE
CHS.47520.6	CHS.47520.7	SGK1	459	526	0.8726	76.2	71.7	1.0628	6276	3538	Small_Intestine	Ovary	244.7032836	117.194979	TRUE	TRUE
CHS.47580.6	CHS.47580.3	IL22RA2	231	263	0.8783	85.7	79.9	1.0726	76	0	Breast	-	1.616361333	0	TRUE	FALSE
CHS.47683.10	CHS.47683.11	NMBR	212	390	0.5436	81.6	77.5	1.0529	39	0	Testis	-	2.060929487	0	FALSE	TRUE
CHS.47799.14	CHS.47799.17	RAET1E	209	263	0.7947	88	81	1.0864	3295	2759	Cervix_Uteri	Vagina	0.96923675	1.096722695	FALSE	FALSE
CHS.47800.1	CHS.47800.2	RAET1G	213	334	0.6377	85.3	68.9	1.238	2697	2514	Adrenal_Gland	Esophagus	8.313132733	9.597243312	FALSE	FALSE
CHS.47818.19	CHS.47818.3	MTHFD1L	913	978	0.9335	89.7	85.4	1.0504	3041	7828	Bone_Marrow	Bone_Marrow	4.314619753	21.65899088	TRUE	TRUE
CHS.47847.6	CHS.47847.10	MTRF1L	238	380	0.6263	88.3	83.9	1.0524	9658	9643	Fallopian_Tube	Bone_Marrow	5.82822	5.047357255	FALSE	FALSE
CHS.47856.31	CHS.47856.6	OPRM1	300	400	0.75	81.4	76.5	1.0641	395	314	Brain	Brain	1.091263897	2.828738752	TRUE	TRUE
CHS.47856.33	CHS.47856.6	OPRM1	292	400	0.73	81.1	76.5	1.0601	912	314	Breast	Brain	0.190415	2.828738752	TRUE	TRUE
CHS.48020.21	CHS.48020.7	QKI	317	341	0.9296	71.3	67.8	1.0516	9173	9761	Nerve	Bone_Marrow	46.11969156	19.19215098	TRUE	TRUE
CHS.48020.22	CHS.48020.7	QKI	311	341	0.912	71.7	67.8	1.0575	720	9761	Nerve	Bone_Marrow	11.907485	19.19215098	TRUE	TRUE
CHS.48096.2	CHS.48096.1	TTLL2	519	592	0.8767	75.3	69.2	1.0882	221	212	Colon	Testis	0.960035833	16.68863219	FALSE	FALSE
CHS.4875.4	CHS.4875.3	TRIM67	721	783	0.9208	81	77	1.0519	4	318	Brain	Skin	2.62740475	5.500395	TRUE	TRUE
CHS.4882.1	CHS.4882.2	SPRTN	250	489	0.5112	83	61.4	1.3518	9307	9193	Bone_Marrow	Testis	1.933599637	10.820363	TRUE	TRUE
CHS.4925.6	CHS.4925.1	SLC35F3	421	490	0.8592	76.2	69.8	1.0917	1993	834	Brain	Brain	6.169916108	6.289692023	TRUE	TRUE
CHS.4930.9	CHS.4930.4	COA6	79	155	0.5097	86.8	68.9	1.2598	9795	9791	Brain	Bone_Marrow	8.975190819	92.07973039	FALSE	FALSE
CHS.49971.17	CHS.49971.4	ANKMY2	399	441	0.9048	92.8	85.5	1.0854	864	9370	Bone_Marrow	Bone_Marrow	11.7288	58.91683627	TRUE	TRUE
CHS.50025.11	CHS.50025.3	TMEM196	171	179	0.9553	76.2	62.2	1.2251	54	689	Uterus	Brain	1.806	2.642719029	TRUE	TRUE
CHS.50025.4	CHS.50025.3	TMEM196	178	179	0.9944	76.9	62.2	1.2363	440	689	Brain	Brain	2.229494775	2.642719029	TRUE	TRUE
CHS.50025.5	CHS.50025.3	TMEM196	185	179	1.0335	76.2	62.2	1.2251	129	689	Pituitary	Brain	1.65729	2.642719029	TRUE	TRUE
CHS.50025.8	CHS.50025.3	TMEM196	188	179	1.0503	74.7	62.2	1.201	36	689	Uterus	Brain	2.79164	2.642719029	TRUE	TRUE
CHS.50076.30	CHS.50076.10	RAPGEF5	611	883	0.692	77.9	71.7	1.0865	4457	2803	Lung	Brain	29.30839643	21.62794171	FALSE	FALSE
CHS.50078.2	CHS.50078.16	STEAP1B	245	264	0.928	81.4	77.1	1.0558	1514	2595	Skin	Skin	7.151328909	12.69138474	FALSE	FALSE
CHS.50168.51	CHS.50168.27	HNRNPA2B1	313	341	0.9179	70.7	67	1.0552	40	9791	Esophagus	Bone_Marrow	20.5283	250.69669	FALSE	FALSE
CHS.50294.16	CHS.50294.4	PDE1C	694	709	0.9788	71.3	67.8	1.0516	235	4304	Brain	Heart	3.820758571	7.398250678	TRUE	TRUE
CHS.50294.17	CHS.50294.4	PDE1C	769	709	1.0846	72.4	67.8	1.0678	9	4304	Brain	Heart	2.754207333	7.398250678	TRUE	TRUE
CHS.50333.6	CHS.50333.5	DPY19L1	675	748	0.9024	88.3	83.1	1.0626	510	6005	Small_Intestine	Bone_Marrow	4.29144	27.823238	TRUE	TRUE
CHS.50337.7	CHS.50337.6	TBX20	297	447	0.6644	76.7	65.6	1.1692	787	784	Nerve	Bladder	0.415933	18.36149825	TRUE	TRUE
CHS.50360.7	CHS.50360.4	KIAA0895	417	517	0.8066	82.3	71.8	1.1462	3097	3029	Fallopian_Tube	Testis	4.361955	6.04444497	TRUE	TRUE
CHS.50510.2	CHS.50510.10	CAMK2B	449	666	0.6742	88.9	70.6	1.2592	2227	1736	Prostate	Muscle	1.68382425	48.00418274	TRUE	TRUE
CHS.50510.29	CHS.50510.10	CAMK2B	603	666	0.9054	75.7	70.6	1.0722	83	1736	Heart	Muscle	2.578158493	48.00418274	TRUE	TRUE
CHS.50510.3	CHS.50510.10	CAMK2B	517	666	0.7763	82.7	70.6	1.1714	3360	1736	Brain	Muscle	8.801769514	48.00418274	TRUE	TRUE
CHS.50510.4	CHS.50510.10	CAMK2B	479	666	0.7192	87.5	70.6	1.2394	2839	1736	Pituitary	Muscle	3.931111646	48.00418274	TRUE	TRUE
CHS.50510.5	CHS.50510.10	CAMK2B	503	666	0.7553	84	70.6	1.1898	3515	1736	Pituitary	Muscle	40.15558838	48.00418274	TRUE	TRUE
CHS.50510.6	CHS.50510.10	CAMK2B	518	666	0.7778	82.8	70.6	1.1728	3363	1736	Pituitary	Muscle	8.248171703	48.00418274	TRUE	TRUE
CHS.50510.7	CHS.50510.10	CAMK2B	492	666	0.7387	78.8	70.6	1.1161	1863	1736	Brain	Muscle	5.112700868	48.00418274	TRUE	TRUE
CHS.50510.9	CHS.50510.10	CAMK2B	542	666	0.8138	80.6	70.6	1.1416	2553	1736	Brain	Muscle	109.483287	48.00418274	TRUE	TRUE
CHS.50615.9	CHS.50615.50	GRB10	536	594	0.9024	76.2	71.9	1.0598	8883	866	Brain	Pituitary	4.05443948	8.56903983	FALSE	FALSE
CHS.50755.8	CHS.50755.5	ZNF138	172	319	0.5392	76.5	61.6	1.2419	8183	6688	Ovary	Bone_Marrow	3.161609725	1.906472594	FALSE	FALSE
CHS.50863.4	CHS.50863.3	NSUN5	429	466	0.9206	91.7	87	1.054	9770	9770	Spleen	Bone_Marrow	8.59040389	41.99995419	FALSE	FALSE
CHS.50999.3	CHS.50999.2	DTX2	575	622	0.9244	73.1	68.6	1.0656	9730	9162	Testis	Testis	4.456486232	32.49791585	TRUE	TRUE
CHS.51117.1	CHS.51117.3	ADAM22	859	964	0.8911	74.3	68.6	1.0831	949	102	Testis	Brain	0.157781	1.84639001	TRUE	TRUE
CHS.51117.10	CHS.51117.3	ADAM22	869	964	0.9015	73	68.6	1.0641	52	102	Brain	Brain	8.10560148	1.84639001	TRUE	TRUE
CHS.51117.20	CHS.51117.3	ADAM22	887	964	0.9201	72.1	68.6	1.051	34	102	Adipose_Tissue	Brain	3.79854	1.84639001	TRUE	TRUE
CHS.51117.7	CHS.51117.3	ADAM22	870	964	0.9025	72.9	68.6	1.0627	2067	102	Brain	Brain	13.50432828	1.84639001	TRUE	TRUE
CHS.51117.8	CHS.51117.3	ADAM22	890	964	0.9232	72.1	68.6	1.051	52	102	Brain	Brain	1.847361133	1.84639001	TRUE	TRUE
CHS.51145.18	CHS.51145.7	CDK14	423	469	0.9019	75.2	70.9	1.0606	4683	8663	Brain	Blood_Vessel	15.4344319	16.49242838	TRUE	TRUE
CHS.51163.1	CHS.51163.9	LRRD1	528	860	0.614	90.6	80	1.1325	249	14	Testis	Testis	4.823699859	12.58238714	TRUE	FALSE
CHS.51163.5	CHS.51163.9	LRRD1	431	860	0.5012	92.4	80	1.155	56	14	Brain	Testis	1.115329675	12.58238714	TRUE	FALSE
CHS.51182.22	CHS.51182.3	VPS50	905	964	0.9388	74.7	70.1	1.0656	79	8817	Breast	Brain	1.23151	9.396676558	TRUE	TRUE
CHS.51295.2	CHS.51295.4	ATP5MF	88	94	0.9362	76.1	67.3	1.1308	9791	9791	Bone_Marrow	Bone_Marrow	354.9779118	228.9850882	FALSE	FALSE
CHS.51297.10	CHS.51297.9	CPSF4	244	269	0.9071	76.9	71.5	1.0755	9730	9752	Bone_Marrow	Bone_Marrow	21.33110297	35.27862059	TRUE	TRUE
CHS.51297.11	CHS.51297.9	CPSF4	243	269	0.9033	76.4	71.5	1.0685	2081	9752	Bone_Marrow	Bone_Marrow	5.632573	35.27862059	TRUE	TRUE
CHS.51374.1	CHS.51374.3	TFR2	630	801	0.7865	91.6	83.9	1.0918	2326	975	Brain	Liver	2.543718611	39.44769697	TRUE	TRUE
CHS.51427.3	CHS.51427.1	MYL10	167	226	0.7389	82.2	59.8	1.3746	41	7	Prostate	Muscle	17.71174333	0.199686333	FALSE	FALSE
CHS.51427.4	CHS.51427.1	MYL10	147	226	0.6504	85.3	59.8	1.4264	25	7	Muscle	Muscle	2.41779	0.199686333	FALSE	FALSE
CHS.51464.16	CHS.51464.14	ARMC10	308	343	0.898	85.2	79.7	1.069	9754	9508	Bone_Marrow	Bone_Marrow	22.91656471	15.6234868	FALSE	FALSE
CHS.51630.18	CHS.51630.1	CAV1	147	178	0.8258	87.3	77.4	1.1279	9731	9536	Lung	Adipose_Tissue	210.3372913	292.8345606	FALSE	TRUE
CHS.5167.8	CHS.5167.9	ZNF124	289	351	0.8234	82.4	77.2	1.0674	6090	3105	Bone_Marrow	Bone_Marrow	2.123414881	1.753441786	FALSE	FALSE
CHS.51777.3	CHS.51777.8	IMPDH1	509	599	0.8497	88.2	82.7	1.0665	7130	2582	Bone_Marrow	Blood	10.15913901	5.126583592	FALSE	FALSE
CHS.51777.4	CHS.51777.8	IMPDH1	514	599	0.8581	89.4	82.7	1.081	2945	2582	Bone_Marrow	Blood	21.8377463	5.126583592	FALSE	FALSE
CHS.51777.9	CHS.51777.8	IMPDH1	522	599	0.8715	88.3	82.7	1.0677	6906	2582	Blood	Blood	25.89572717	5.126583592	FALSE	FALSE
CHS.51908.14	CHS.51908.1	AKR1B15	316	344	0.9186	96.3	85.1	1.1316	183	100	Skin	Prostate	11.9335469	9.33611	FALSE	FALSE
CHS.51908.3	CHS.51908.1	AKR1B15	248	344	0.7209	96.3	85.1	1.1316	327	100	Vagina	Prostate	6.229460333	9.33611	FALSE	FALSE
CHS.51973.8	CHS.51973.7	ZC3HAV1L	276	300	0.92	86.2	81.5	1.0577	615	2417	Prostate	Ovary	3.796816833	1.738670738	FALSE	FALSE
CHS.52202.19	CHS.52202.16	ACTR3C	194	210	0.9238	90.9	85.6	1.0619	55	2127	Thyroid	Liver	4.54534	6.403395607	FALSE	FALSE
CHS.52202.21	CHS.52202.16	ACTR3C	189	210	0.9	91.7	85.6	1.0713	279	2127	Liver	Liver	5.75279	6.403395607	FALSE	FALSE
CHS.52273.9	CHS.52273.5	CRYGN	182	182	1	92.2	67.7	1.3619	391	996	Thyroid	Thyroid	3.703901072	4.062835796	FALSE	FALSE
CHS.52277.5	CHS.52277.8	PRKAG2	328	569	0.5764	88.6	64.7	1.3694	9624	8110	Bladder	Bladder	28.67324909	22.55282273	TRUE	TRUE
CHS.52315.10	CHS.52315.20	DPP6	801	865	0.926	90.3	85.5	1.0561	2845	1511	Uterus	Uterus	54.05359306	9.661554314	TRUE	TRUE
CHS.52315.22	CHS.52315.20	DPP6	803	865	0.9283	90.3	85.5	1.0561	2609	1511	Brain	Uterus	29.09240116	9.661554314	TRUE	TRUE
CHS.5236.5	CHS.5236.12	SH3BP5L	361	393	0.9186	75.4	71.8	1.0501	4	9773	Lung	Spleen	0.646931	25.81053331	TRUE	TRUE
CHS.52917.5	CHS.52917.6	BMP1	479	730	0.6562	90.1	81.7	1.1028	9182	9155	Cervix_Uteri	Cervix_Uteri	4.231152727	4.013082727	FALSE	FALSE
CHS.52917.8	CHS.52917.6	BMP1	735	730	1.0068	86.9	81.7	1.0636	9150	9155	Adrenal_Gland	Cervix_Uteri	16.81126665	4.013082727	FALSE	FALSE
CHS.52995.1	CHS.52995.14	ADAM28	540	775	0.6968	79.2	74.4	1.0645	2035	1969	Stomach	Stomach	1.303584497	22.95278116	TRUE	FALSE
CHS.53035.7	CHS.53035.1	DPYSL2	572	677	0.8449	89.4	81.8	1.0929	9488	6865	Brain	Brain	186.2585383	18.94648924	TRUE	TRUE
CHS.53038.10	CHS.53038.12	ADRA1A	427	466	0.9163	72.2	66	1.0939	24	3221	Heart	Liver	4.967484286	6.623193985	TRUE	TRUE
CHS.53038.9	CHS.53038.12	ADRA1A	429	466	0.9206	70.9	66	1.0742	2375	3221	Liver	Liver	38.03367189	6.623193985	TRUE	TRUE
CHS.53042.3	CHS.53042.4	STMN4	189	216	0.875	80.4	73	1.1014	2864	2147	Brain	Brain	52.68207472	20.41026618	TRUE	TRUE
CHS.53126.18	CHS.53126.4	RBPMS	179	196	0.9133	70.4	66.6	1.0571	7	9262	Blood_Vessel	Bladder	7.20327	151.7086636	TRUE	TRUE
CHS.53126.20	CHS.53126.4	RBPMS	186	196	0.949	71.5	66.6	1.0736	7	9262	Heart	Bladder	1.637028	151.7086636	TRUE	TRUE
CHS.53126.24	CHS.53126.4	RBPMS	179	196	0.9133	70	66.6	1.0511	2315	9262	Blood_Vessel	Bladder	111.8594579	151.7086636	FALSE	TRUE
CHS.53251.29	CHS.53251.5	ADAM9	752	819	0.9182	80.2	75.8	1.058	8	9566	Lung	Skin	1.37706	84.54675976	FALSE	FALSE
CHS.53411.2	CHS.53411.1	OPRK1	291	380	0.7658	82.8	78	1.0615	22	0	Pituitary	-	2.269455	0	TRUE	TRUE
CHS.53416.13	CHS.53416.1	RGS20	241	388	0.6211	73.2	59	1.2407	2601	96	Brain	Brain	12.25793387	0.828013471	FALSE	FALSE
CHS.53416.20	CHS.53416.1	RGS20	220	388	0.567	76.6	59	1.2983	364	96	Thyroid	Brain	2.31	0.828013471	TRUE	FALSE
CHS.53416.22	CHS.53416.1	RGS20	224	388	0.5773	74.6	59	1.2644	720	96	Brain	Brain	2.490156831	0.828013471	TRUE	FALSE
CHS.53416.8	CHS.53416.1	RGS20	217	388	0.5593	77.5	59	1.3136	973	96	Brain	Brain	5.165562802	0.828013471	FALSE	FALSE
CHS.53548.1	CHS.53548.40	ASPH	686	758	0.905	72.5	68.5	1.0584	36	9405	Adipose_Tissue	Adrenal_Gland	23.33166182	54.04623292	FALSE	FALSE
CHS.53548.24	CHS.53548.40	ASPH	711	758	0.938	73.5	68.5	1.073	28	9405	Blood	Adrenal_Gland	3.166446667	54.04623292	FALSE	FALSE
CHS.53548.25	CHS.53548.40	ASPH	729	758	0.9617	72.2	68.5	1.054	26	9405	Colon	Adrenal_Gland	7.831615	54.04623292	FALSE	FALSE
CHS.53548.27	CHS.53548.40	ASPH	730	758	0.9631	72.1	68.5	1.0526	27	9405	Pituitary	Adrenal_Gland	16.388695	54.04623292	FALSE	FALSE
CHS.53548.7	CHS.53548.40	ASPH	724	758	0.9551	72.7	68.5	1.0613	5	9405	Stomach	Adrenal_Gland	3.66959	54.04623292	FALSE	FALSE
CHS.53558.7	CHS.53558.5	NKAIN3	197	218	0.9037	74.4	70	1.0629	3	730	Nerve	Stomach	0.3074135	1.78632	FALSE	TRUE
CHS.53611.5	CHS.53611.4	DNAJC5B	180	199	0.9045	77.3	69	1.1203	11	330	Testis	Testis	3.7615022	55.98081135	FALSE	FALSE
CHS.53613.13	CHS.53613.12	TRIM55	452	548	0.8248	71.7	65.2	1.0997	1695	1288	Heart	Muscle	22.22249301	10.65162457	TRUE	TRUE
CHS.53660.3	CHS.53660.2	PRDM14	316	571	0.5534	73.7	60.5	1.2182	29	14	Testis	Testis	1.255830034	1.228419	TRUE	TRUE
CHS.53700.42	CHS.53700.6	STAU2	549	570	0.9632	72.9	68.8	1.0596	2627	9035	Bone_Marrow	Muscle	8.117726923	9.715742471	FALSE	FALSE
CHS.53700.43	CHS.53700.6	STAU2	517	570	0.907	72.4	68.8	1.0523	5412	9035	Bone_Marrow	Muscle	8.369573626	9.715742471	FALSE	FALSE
CHS.53727.5	CHS.53727.18	HNF4G	408	455	0.8967	77.5	72.9	1.0631	429	243	Small_Intestine	Small_Intestine	15.99543542	21.12019137	FALSE	FALSE
CHS.53867.1	CHS.53867.3	CNGB3	671	809	0.8294	73.3	67	1.094	93	4	Testis	Ovary	3.983124011	2.87839	TRUE	TRUE
CHS.53905.1	CHS.53905.4	OSGIN2	505	549	0.9199	86.4	81	1.0667	5584	9200	Testis	Nerve	14.70281047	26.29142321	TRUE	TRUE
CHS.5414.12	CHS.5414.13	FBH1	969	1043	0.9291	81	76.9	1.0533	4484	9648	Fallopian_Tube	Bone_Marrow	9.896053333	26.14839634	FALSE	TRUE
CHS.54278.1	CHS.54278.5	SLC30A8	320	369	0.8672	84.1	75.3	1.1169	478	208	Pancreas	Pancreas	4.216153585	3.986609705	FALSE	FALSE
CHS.54658.20	CHS.54658.3	TSNARE1	277	513	0.54	73.1	67.2	1.0878	5494	2908	Bladder	Nerve	1.762804286	1.378685396	FALSE	FALSE
CHS.54733.2	CHS.54733.1	CCDC166	399	439	0.9089	73	69.3	1.0534	43	371	Testis	Testis	1.933370268	5.803188908	FALSE	TRUE
CHS.54803.17	CHS.54803.6	ZNF34	499	539	0.9258	70.6	67	1.0537	432	9211	Breast	Nerve	1.4134139	7.643684687	FALSE	FALSE
CHS.54940.4	CHS.54940.3	CBWD1	359	395	0.9089	79.1	75	1.0547	9656	9696	Thyroid	Thyroid	12.33613503	17.87453836	FALSE	TRUE
CHS.54984.43	CHS.54984.12	RFX3	682	749	0.9105	70.2	66	1.0636	30	4064	Vagina	Fallopian_Tube	1.52023	7.804896667	TRUE	TRUE
CHS.55319.28	CHS.55319.27	AQP7	257	342	0.7515	91.8	82.8	1.1087	5334	4961	Adipose_Tissue	Adipose_Tissue	18.02195845	66.9797686	FALSE	FALSE
CHS.55340.2	CHS.55340.15	PRSS3	139	247	0.5628	96.4	91.5	1.0536	5226	4045	Pancreas	Pancreas	360.290696	2856.789854	FALSE	FALSE
CHS.55379.11	CHS.55379.1	DNAJB5	382	420	0.9095	74.2	69.1	1.0738	2937	6703	Brain	Pituitary	2.535216033	6.168107189	TRUE	FALSE
CHS.55379.8	CHS.55379.1	DNAJB5	348	420	0.8286	78.4	69.1	1.1346	9411	6703	Blood_Vessel	Pituitary	64.16334352	6.168107189	FALSE	FALSE
CHS.5572.4	CHS.5572.27	FAM107B	170	306	0.5556	76.2	60.6	1.2574	5116	314	Colon	Testis	2.793303467	8.233238088	TRUE	TRUE
CHS.55721.9	CHS.55721.5	CFAP95	130	229	0.5677	70.9	67.4	1.0519	1067	845	Pituitary	Testis	8.73891888	22.91623188	FALSE	FALSE
CHS.55846.5	CHS.55846.4	TLE4	704	773	0.9107	70	66.4	1.0542	3302	9356	Testis	Testis	6.959372191	52.77897314	TRUE	TRUE
CHS.55860.19	CHS.55860.14	TLE1	696	770	0.9039	70.7	66.8	1.0584	542	9447	Fallopian_Tube	Nerve	3.333315	66.85216313	TRUE	TRUE
CHS.55860.30	CHS.55860.14	TLE1	695	770	0.9026	70.6	66.8	1.0569	439	9447	Cervix_Uteri	Nerve	4.3516725	66.85216313	TRUE	TRUE
CHS.55898.8	CHS.55898.7	SLC28A3	622	691	0.9001	85.1	79.2	1.0745	330	1382	Breast	Adipose_Tissue	4.432564765	6.607304265	FALSE	TRUE
CHS.55901.25	CHS.55901.33	NTRK2	477	838	0.5692	81.1	75.8	1.0699	6121	29	Brain	Brain	39.21345508	5.617935862	TRUE	FALSE
CHS.56089.19	CHS.56089.7	CARD19	170	183	0.929	75.6	69.5	1.0878	19	9775	Esophagus	Testis	4.51889	20.9304528	TRUE	TRUE
CHS.56137.32	CHS.56137.18	AOPEP	529	819	0.6459	87.8	82.4	1.0655	5670	257	Uterus	Blood_Vessel	6.523238481	7.440071	TRUE	TRUE
CHS.56174.30	CHS.56174.25	CDC14B	462	498	0.9277	82	78	1.0513	109	7008	Nerve	Testis	5.159196667	7.218714406	TRUE	TRUE
CHS.56239.1	CHS.56239.4	TBC1D2	468	928	0.5043	87.2	74.2	1.1752	9540	8509	Brain	Lung	2.99622491	36.57744609	TRUE	TRUE
CHS.56430.11	CHS.56430.8	EPB41L4B	518	900	0.5756	71.2	55.5	1.2829	5649	1859	Pancreas	Brain	88.5639691	11.99963689	TRUE	TRUE
CHS.56446.10	CHS.56446.8	TXNDC8	105	95	1.1053	87.5	56.7	1.5432	3	186	Testis	Testis	1.714626	1.28166822	TRUE	TRUE
CHS.56446.13	CHS.56446.8	TXNDC8	128	95	1.3474	78.7	56.7	1.388	4	186	Testis	Testis	0.90056525	1.28166822	TRUE	TRUE
CHS.56446.14	CHS.56446.8	TXNDC8	105	95	1.1053	96.9	56.7	1.709	58	186	Testis	Testis	4.369971207	1.28166822	TRUE	TRUE
CHS.56446.6	CHS.56446.8	TXNDC8	127	95	1.3368	84.4	56.7	1.4885	194	186	Testis	Testis	5.511752354	1.28166822	TRUE	TRUE
CHS.56446.9	CHS.56446.8	TXNDC8	115	95	1.2105	82.3	56.7	1.4515	181	186	Testis	Testis	1.421375834	1.28166822	TRUE	TRUE
CHS.56522.3	CHS.56522.5	WDR31	242	367	0.6594	94.6	86.2	1.0974	3259	3186	Pituitary	Testis	1.920588319	4.076590483	FALSE	FALSE
CHS.56730.1	CHS.56730.5	NR6A1	438	480	0.9125	79.8	75.6	1.0556	51	1629	Small_Intestine	Testis	4.02059	19.1374368	TRUE	TRUE
CHS.56730.19	CHS.56730.5	NR6A1	437	480	0.9104	79.9	75.6	1.0569	40	1629	Colon	Testis	3.56637	19.1374368	TRUE	TRUE
CHS.56760.8	CHS.56760.1	PBX3	351	434	0.8088	74.9	66.2	1.1314	9480	9464	Ovary	Adrenal_Gland	35.43569265	27.23795789	TRUE	TRUE
CHS.56771.1	CHS.56771.8	MVB12B	221	319	0.6928	80.4	72.7	1.1059	8798	8771	Lung	Nerve	0.562138961	36.25525352	TRUE	TRUE
CHS.56815.10	CHS.56815.16	SH2D3C	703	860	0.8174	70.1	62.3	1.1252	8857	5091	Lung	Spleen	49.24234172	30.65582636	TRUE	TRUE
CHS.56815.7	CHS.56815.16	SH2D3C	506	860	0.5884	72.5	62.3	1.1637	6605	5091	Lung	Spleen	15.53650051	30.65582636	TRUE	TRUE
CHS.56827.9	CHS.56827.11	ST6GALNAC6	299	333	0.8979	88.1	83.9	1.0501	9748	9733	Brain	Brain	16.15233443	13.26640834	TRUE	TRUE
CHS.56863.2	CHS.56863.18	ODF2	657	912	0.7204	77.8	72.2	1.0776	1809	28	Testis	Liver	3.084830075	2.39218	TRUE	TRUE
CHS.56863.36	CHS.56863.18	ODF2	767	912	0.841	78.5	72.2	1.0873	77	28	Uterus	Liver	4.21908	2.39218	TRUE	TRUE
CHS.56863.37	CHS.56863.18	ODF2	824	912	0.9035	76.2	72.2	1.0554	9578	28	Bone_Marrow	Liver	54.8648098	2.39218	TRUE	TRUE
CHS.56863.39	CHS.56863.18	ODF2	748	912	0.8202	79.3	72.2	1.0983	35	28	Adipose_Tissue	Liver	2.131628	2.39218	TRUE	TRUE
CHS.56863.42	CHS.56863.18	ODF2	638	912	0.6996	77.9	72.2	1.0789	4686	28	Testis	Liver	12.06942237	2.39218	TRUE	TRUE
CHS.56863.53	CHS.56863.18	ODF2	638	912	0.6996	78.2	72.2	1.0831	922	28	Testis	Liver	122.5741719	2.39218	TRUE	TRUE
CHS.56863.6	CHS.56863.18	ODF2	576	912	0.6316	80.9	72.2	1.1205	6833	28	Bone_Marrow	Liver	1.02203344	2.39218	TRUE	TRUE
CHS.56863.79	CHS.56863.18	ODF2	657	912	0.7204	77	72.2	1.0665	62	28	Testis	Liver	62.01565339	2.39218	TRUE	TRUE
CHS.56863.82	CHS.56863.18	ODF2	633	912	0.6941	78.2	72.2	1.0831	678	28	Kidney	Liver	8.50959	2.39218	TRUE	TRUE
CHS.56863.83	CHS.56863.18	ODF2	652	912	0.7149	78.3	72.2	1.0845	480	28	Uterus	Liver	8.2994325	2.39218	TRUE	TRUE
CHS.56863.9	CHS.56863.18	ODF2	805	912	0.8827	76.5	72.2	1.0596	1168	28	Bone_Marrow	Liver	13.14710756	2.39218	FALSE	TRUE
CHS.56953.21	CHS.56953.10	FNBP1	556	617	0.9011	81.1	76.1	1.0657	188	9131	Uterus	Uterus	7.48974	30.92687542	TRUE	TRUE
CHS.56953.22	CHS.56953.10	FNBP1	560	617	0.9076	80.6	76.1	1.0591	736	9131	Uterus	Uterus	5.192763333	30.92687542	TRUE	TRUE
CHS.56953.23	CHS.56953.10	FNBP1	561	617	0.9092	80.6	76.1	1.0591	111	9131	Stomach	Uterus	3.27082	30.92687542	TRUE	TRUE
CHS.56953.3	CHS.56953.10	FNBP1	556	617	0.9011	80.7	76.1	1.0604	1213	9131	Bladder	Uterus	26.67654	30.92687542	TRUE	TRUE
CHS.57019.3	CHS.57019.7	DDX31	674	746	0.9035	76.1	72	1.0569	30	8668	Nerve	Thyroid	3.295876182	14.28778621	TRUE	TRUE
CHS.57048.3	CHS.57048.2	MED22	140	200	0.7	89.2	75.2	1.1862	9727	8186	Uterus	Brain	33.39488125	7.246629116	FALSE	FALSE
CHS.57107.1	CHS.57107.11	OLFM1	467	485	0.9629	80.4	75.5	1.0649	9029	8833	Brain	Brain	98.89985855	49.72164812	TRUE	TRUE
CHS.57107.8	CHS.57107.11	OLFM1	458	485	0.9443	83.3	75.5	1.1033	731	8833	Brain	Brain	10.29551541	49.72164812	TRUE	TRUE
CHS.57164.1	CHS.57164.2	GPSM1	457	675	0.677	82.5	69.5	1.1871	8493	8436	Nerve	Nerve	0.782249745	52.70617412	TRUE	TRUE
CHS.57426.3	CHS.57426.2	ASMT	298	373	0.7989	93	87.1	1.0677	728	256	Blood	Blood	0.930291288	0.868542444	FALSE	FALSE
CHS.57426.4	CHS.57426.2	ASMT	345	373	0.9249	94.7	87.1	1.0873	75	256	Cervix_Uteri	Blood	1.12006	0.868542444	FALSE	FALSE
CHS.57447.9	CHS.57447.10	GYG2	430	470	0.9149	72.9	68.5	1.0642	28	3989	Brain	Adipose_Tissue	1.456702533	46.65005585	FALSE	FALSE
CHS.57496.3	CHS.57496.7	TBL1X	526	577	0.9116	86.7	82.3	1.0535	5839	7404	Uterus	Uterus	13.88423402	55.08330211	FALSE	FALSE
CHS.57568.3	CHS.57568.4	GPM6B	265	328	0.8079	83.1	77.5	1.0723	5853	3673	Nerve	Brain	38.50249641	4.102961569	TRUE	TRUE
CHS.57568.8	CHS.57568.4	GPM6B	246	328	0.75	84.8	77.5	1.0942	8091	3673	Brain	Brain	220.1920085	4.102961569	TRUE	TRUE
CHS.57640.2	CHS.57640.1	RS1	192	224	0.8571	81.9	76.7	1.0678	275	0	Lung	-	2.947430681	0	TRUE	TRUE
CHS.57851.18	CHS.57851.4	DDX3X	598	662	0.9033	74.5	70.7	1.0537	4	9772	Adipose_Tissue	Fallopian_Tube	5.786386667	102.2140143	FALSE	FALSE
CHS.58025.7	CHS.58025.4	CLCN5	746	816	0.9142	85.9	79.9	1.0751	758	1260	Brain	Ovary	5.990092814	8.404928657	TRUE	TRUE
CHS.58077.7	CHS.58077.6	RIBC1	238	379	0.628	90.3	85.7	1.0537	3979	2406	Fallopian_Tube	Testis	10.80351143	43.74967609	FALSE	FALSE
CHS.58147.12	CHS.58147.25	ARHGEF9	414	523	0.7916	84.5	77.6	1.0889	7482	140	Brain	Ovary	5.263842439	8.35745	FALSE	TRUE
CHS.58212.6	CHS.58212.4	DLG3	512	817	0.6267	76.2	72	1.0583	7323	1063	Salivary_Gland	Skin	15.40503	22.4174	TRUE	TRUE
CHS.58315.2	CHS.58315.17	MAGT1	367	335	1.0955	83.4	83.4	1	9655	0	Thyroid	-	51.55859333	0	TRUE	TRUE
CHS.58424.11	CHS.58424.3	DRP2	879	957	0.9185	77.3	72.7	1.0633	423	1141	Nerve	Nerve	215.0352189	15.43899496	TRUE	FALSE
CHS.58489.17	CHS.58489.16	PLP1	242	277	0.8736	84.1	76.1	1.1051	7674	7207	Nerve	Brain	358.4721091	1626.597623	TRUE	TRUE
CHS.58539.2	CHS.58539.3	MID2	685	735	0.932	83.1	78.2	1.0627	1595	6816	Nerve	Uterus	2.977091745	3.845032783	TRUE	TRUE
CHS.58771.8	CHS.58771.5	SLC25A14	290	325	0.8923	81.3	68.2	1.1921	9063	5532	Pituitary	Brain	15.29436973	10.78146657	TRUE	TRUE
CHS.58840.2	CHS.58840.1	CT55	242	264	0.9167	76.7	72	1.0653	399	380	Bone_Marrow	Bone_Marrow	13.99483039	19.99032451	FALSE	FALSE
CHS.58861.24	CHS.58861.30	SLC9A6	512	679	0.7541	80.1	70.9	1.1298	1	0	Breast	-	0.533005	0	FALSE	FALSE
CHS.58862.11	CHS.58862.3	FHL1	280	323	0.8669	88.7	68.5	1.2949	9681	8843	Heart	Cervix_Uteri	2.995815919	154.6436946	TRUE	TRUE
CHS.58862.22	CHS.58862.3	FHL1	309	323	0.9567	87.3	68.5	1.2745	8746	8843	Muscle	Cervix_Uteri	2.200496798	154.6436946	TRUE	TRUE
CHS.58862.23	CHS.58862.3	FHL1	296	323	0.9164	87.6	68.5	1.2788	9645	8843	Muscle	Cervix_Uteri	3330.56845	154.6436946	TRUE	TRUE
CHS.58862.29	CHS.58862.3	FHL1	210	323	0.6502	78.4	68.5	1.1445	9401	8843	Muscle	Cervix_Uteri	62.27881244	154.6436946	TRUE	TRUE
CHS.58862.5	CHS.58862.3	FHL1	194	323	0.6006	78.8	68.5	1.1504	9426	8843	Heart	Cervix_Uteri	19.06029273	154.6436946	TRUE	TRUE
CHS.59047.3	CHS.59047.1	SRPK3	533	567	0.94	80.7	76.1	1.0604	2010	3629	Prostate	Muscle	1.854123281	32.29693577	TRUE	TRUE
CHS.59048.14	CHS.59048.4	IDH3G	363	393	0.9237	91.5	87.1	1.0505	380	9782	Small_Intestine	Blood_Vessel	7.915654286	67.09072593	TRUE	TRUE
CHS.5906.26	CHS.5906.8	NRP1	644	923	0.6977	83.8	77.8	1.0771	8463	8422	Kidney	Adipose_Tissue	1.230614571	55.14039429	TRUE	TRUE
CHS.59079.10	CHS.59079.8	TAFAZZIN	262	292	0.8973	94	86.2	1.0905	9753	9740	Spleen	Spleen	9.61899178	9.817655508	FALSE	FALSE
CHS.59107.19	CHS.59107.9	MPP1	420	466	0.9013	83.9	78.6	1.0674	39	9754	Ovary	Bone_Marrow	4.04034	473.0027157	FALSE	TRUE
CHS.59117.1	CHS.59117.12	VBP1	192	197	0.9746	85.6	76.6	1.1175	57	0	Bone_Marrow	-	4.509266	0	TRUE	TRUE
CHS.59117.3	CHS.59117.12	VBP1	233	197	1.1827	76.6	76.6	1	9774	0	Bone_Marrow	-	138.737098	0	TRUE	TRUE
CHS.59117.7	CHS.59117.12	VBP1	160	197	0.8122	91.6	76.6	1.1958	2443	0	Fallopian_Tube	-	3.37779	0	TRUE	TRUE
CHS.6033.6	CHS.6033.4	ZNF32	248	273	0.9084	82.1	75.7	1.0845	7080	9748	Thyroid	Uterus	4.300101754	64.19135729	TRUE	TRUE
CHS.6106.52	CHS.6106.6	PTPN20	228	420	0.5429	93.3	77.2	1.2085	135	116	Blood_Vessel	Testis	1.21052	2.223875186	FALSE	FALSE
CHS.6106.9	CHS.6106.6	PTPN20	339	420	0.8071	87.7	77.2	1.136	1219	116	Spleen	Testis	1.835695	2.223875186	FALSE	FALSE
CHS.6139.3	CHS.6139.1	FAM25C	139	89	1.5618	75.9	57	1.3316	480	1710	Salivary_Gland	Salivary_Gland	4.7981775	19.31451997	FALSE	FALSE
CHS.6144.16	CHS.6144.13	MAPK8	384	427	0.8993	86	81.2	1.0591	5526	5192	Bone_Marrow	Brain	10.77628676	5.196469975	TRUE	TRUE
CHS.6165.5	CHS.6165.6	CHAT	666	748	0.8904	87.9	81.7	1.0759	0	0	-	-	0	0	FALSE	FALSE
CHS.6165.8	CHS.6165.6	CHAT	630	748	0.8422	91.5	81.7	1.12	135	0	Vagina	-	3.07337	0	FALSE	FALSE
CHS.6339.6	CHS.6339.5	DNAJC12	107	198	0.5404	75.8	64.7	1.1716	8543	7948	Bone_Marrow	Adrenal_Gland	13.239285	68.78657565	TRUE	TRUE
CHS.6367.13	CHS.6367.1	DDX21	715	783	0.9132	74.4	70.4	1.0568	4759	9586	Fallopian_Tube	Bone_Marrow	1.888785167	204.8746078	TRUE	TRUE
CHS.6368.7	CHS.6368.1	DDX50	672	737	0.9118	78.2	73.5	1.0639	5421	9716	Bone_Marrow	Bone_Marrow	6.603038032	70.35484804	TRUE	TRUE
CHS.64.16	CHS.64.6	TTLL10	404	673	0.6003	72.3	66.8	1.0823	279	202	Testis	Cervix_Uteri	16.67848282	3.20712	FALSE	FALSE
CHS.645.52	CHS.645.10	TMCO4	580	634	0.9148	75.1	71.2	1.0548	2	5866	Skin	Prostate	1.09876	7.912561916	FALSE	FALSE
CHS.6496.2	CHS.6496.4	ANXA7	426	466	0.9142	81.3	77.4	1.0504	2600	9784	Bone_Marrow	Bone_Marrow	3.897004237	136.2016863	FALSE	FALSE
CHS.6517.11	CHS.6517.28	CAMK2G	542	588	0.9218	80.3	76.3	1.0524	155	63	Blood_Vessel	Brain	6.166864545	5.786577645	TRUE	TRUE
CHS.6517.116	CHS.6517.28	CAMK2G	535	588	0.9099	81.2	76.3	1.0642	0	63	-	Brain	0	5.786577645	TRUE	TRUE
CHS.6517.12	CHS.6517.28	CAMK2G	506	588	0.8605	83.4	76.3	1.0931	666	63	Brain	Brain	10.54392151	5.786577645	TRUE	TRUE
CHS.6517.15	CHS.6517.28	CAMK2G	529	588	0.8997	81.8	76.3	1.0721	4797	63	Blood_Vessel	Brain	15.79833853	5.786577645	TRUE	TRUE
CHS.6517.17	CHS.6517.28	CAMK2G	516	588	0.8776	82.9	76.3	1.0865	8551	63	Blood_Vessel	Brain	10.52804291	5.786577645	TRUE	TRUE
CHS.6517.26	CHS.6517.28	CAMK2G	550	588	0.9354	80.2	76.3	1.0511	56	63	Pituitary	Brain	6.29792	5.786577645	TRUE	TRUE
CHS.6517.32	CHS.6517.28	CAMK2G	495	588	0.8418	84.5	76.3	1.1075	9477	63	Blood_Vessel	Brain	9.507712161	5.786577645	TRUE	TRUE
CHS.6517.33	CHS.6517.28	CAMK2G	504	588	0.8571	83.7	76.3	1.097	672	63	Bladder	Brain	7.35718	5.786577645	TRUE	TRUE
CHS.6517.34	CHS.6517.28	CAMK2G	518	588	0.881	82.8	76.3	1.0852	5348	63	Blood_Vessel	Brain	42.49195789	5.786577645	TRUE	TRUE
CHS.6517.36	CHS.6517.28	CAMK2G	539	588	0.9167	81	76.3	1.0616	8713	63	Bladder	Brain	27.63547755	5.786577645	TRUE	TRUE
CHS.6517.37	CHS.6517.28	CAMK2G	527	588	0.8963	82.1	76.3	1.076	6057	63	Brain	Brain	6.565344557	5.786577645	TRUE	TRUE
CHS.6517.76	CHS.6517.28	CAMK2G	519	588	0.8827	81.2	76.3	1.0642	64	63	Vagina	Brain	10.3239	5.786577645	TRUE	TRUE
CHS.6517.78	CHS.6517.28	CAMK2G	533	588	0.9065	81.1	76.3	1.0629	217	63	Bladder	Brain	8.3985	5.786577645	TRUE	TRUE
CHS.6517.8	CHS.6517.28	CAMK2G	510	588	0.8673	82	76.3	1.0747	1104	63	Prostate	Brain	6.697232857	5.786577645	TRUE	TRUE
CHS.6534.9	CHS.6534.2	DUSP13	198	334	0.5928	89.8	66.6	1.3483	1318	1308	Testis	Testis	22.75597417	54.50931369	TRUE	TRUE
CHS.657.6	CHS.657.3	PLA2G2F	168	211	0.7962	86.4	79.5	1.0868	743	313	Bladder	Skin	43.869532	4.65310665	TRUE	TRUE
CHS.6787.3	CHS.6787.2	HTR7	432	479	0.9019	75.7	71.3	1.0617	1976	620	Testis	Testis	3.226719599	3.135593708	FALSE	FALSE
CHS.6802.5	CHS.6802.18	PCGF5	236	256	0.9219	84.1	79.4	1.0592	2551	9357	Cervix_Uteri	Blood_Vessel	5.77028	12.29899056	TRUE	TRUE
CHS.6927.2	CHS.6927.25	ANKRD2	360	333	1.0811	76.4	76.4	1	0	0	-	-	0	0	TRUE	TRUE
CHS.6943.2	CHS.6943.9	CRTAC1	610	661	0.9228	90.8	85.7	1.0595	7	5914	Brain	Bladder	2.36996	75.58357273	TRUE	TRUE
CHS.7029.1	CHS.7029.4	FGF8	204	244	0.8361	85.1	78.9	1.0786	116	79	Breast	Adipose_Tissue	5.204051	1.21604275	TRUE	TRUE
CHS.7029.2	CHS.7029.4	FGF8	215	244	0.8811	84.9	78.9	1.076	108	79	Testis	Adipose_Tissue	1.066605533	1.21604275	TRUE	TRUE
CHS.7029.5	CHS.7029.4	FGF8	140	244	0.5738	83.6	78.9	1.0596	669	79	Testis	Adipose_Tissue	1.7561474	1.21604275	FALSE	TRUE
CHS.7034.13	CHS.7034.17	KCNIP2	225	270	0.8333	74.5	66.5	1.1203	3802	2858	Brain	Brain	20.37903988	44.36375232	TRUE	TRUE
CHS.7034.14	CHS.7034.17	KCNIP2	220	270	0.8148	75.3	66.5	1.1323	4874	2858	Heart	Brain	114.1612086	44.36375232	TRUE	TRUE
CHS.7118.16	CHS.7118.4	CFAP43	940	1665	0.5646	84.4	77.4	1.0904	691	403	Fallopian_Tube	Fallopian_Tube	2.063225333	38.38979333	FALSE	FALSE
CHS.7208.8	CHS.7208.6	TECTB	182	329	0.5532	85	67.8	1.2537	24	1	Thyroid	Brain	2.129847864	0.657727	TRUE	TRUE
CHS.7287.17	CHS.7287.6	SHTN1	573	631	0.9081	72.3	68.2	1.0601	158	8468	Small_Intestine	Pituitary	3.69678	26.28554837	TRUE	TRUE
CHS.7394.34	CHS.7394.9	BTBD16	271	506	0.5356	86.7	78.1	1.1101	508	340	Bladder	Testis	19.56875833	13.59932419	FALSE	FALSE
CHS.7394.35	CHS.7394.9	BTBD16	338	506	0.668	91.8	78.1	1.1754	578	340	Bladder	Testis	33.30856625	13.59932419	FALSE	FALSE
CHS.7396.55	CHS.7396.3	PLEKHA1	372	404	0.9208	71.4	67.3	1.0609	27	7812	Thyroid	Skin	2.28673	5.319265184	TRUE	TRUE
CHS.7396.7	CHS.7396.3	PLEKHA1	366	404	0.9059	71.9	67.3	1.0684	14	7812	Testis	Skin	6.292417714	5.319265184	TRUE	TRUE
CHS.7396.97	CHS.7396.3	PLEKHA1	380	404	0.9406	72.1	67.3	1.0713	0	7812	-	Skin	0	5.319265184	TRUE	TRUE
CHS.7460.20	CHS.7460.3	CTBP2	513	985	0.5208	72.6	56.4	1.2872	3917	1203	Bladder	Pituitary	0.42243375	0.727633075	TRUE	TRUE
CHS.75.18	CHS.75.17	SCNN1D	638	802	0.7955	74.2	63.8	1.163	5300	4266	Testis	Testis	7.410278451	8.616211833	FALSE	FALSE
CHS.7640.2	CHS.7640.6	SYCE1	282	351	0.8034	85.3	77.3	1.1035	1300	911	Brain	Testis	2.48815309	9.90872125	FALSE	FALSE
CHS.7704.14	CHS.7704.13	RASSF7	320	373	0.8579	79	73.3	1.0778	6969	6805	Kidney	Kidney	3.455059833	3.695392389	TRUE	TRUE
CHS.7812.7	CHS.7812.4	TSPAN32	288	320	0.9	83	70.1	1.184	1567	2655	Prostate	Blood	1.052456571	2.882594317	FALSE	FALSE
CHS.7860.23	CHS.7860.58	PGAP2	294	315	0.9333	84	78	1.0769	463	4116	Testis	Lung	6.957879063	1.478863055	FALSE	FALSE
CHS.7860.54	CHS.7860.58	PGAP2	254	315	0.8063	87.9	78	1.1269	8776	4116	Skin	Lung	7.596725042	1.478863055	FALSE	FALSE
CHS.7860.82	CHS.7860.58	PGAP2	250	315	0.7937	86.5	78	1.109	8675	4116	Skin	Lung	7.787827171	1.478863055	FALSE	FALSE
CHS.7895.6	CHS.7895.5	MMP26	191	261	0.7318	89	78.2	1.1381	0	0	-	-	0	0	FALSE	FALSE
CHS.8003.4	CHS.8003.5	OVCH2	302	565	0.5345	84.8	80.6	1.0521	30	0	Kidney	-	2.691112588	0	FALSE	FALSE
CHS.809.20	CHS.809.21	NIPAL3	367	406	0.9039	78.6	74	1.0622	80	8664	Brain	Brain	6.5741925	40.81490439	TRUE	TRUE
CHS.809.25	CHS.809.21	NIPAL3	368	406	0.9064	79.3	74	1.0716	7448	8664	Prostate	Brain	8.856489114	40.81490439	FALSE	TRUE
CHS.8123.15	CHS.8123.5	MICAL2	934	1124	0.831	74	70.2	1.0541	4876	2560	Blood_Vessel	Skin	6.48662584	54.101147	FALSE	FALSE
CHS.8123.23	CHS.8123.5	MICAL2	955	1124	0.8496	75.6	70.2	1.0769	8931	2560	Blood_Vessel	Skin	39.42023458	54.101147	FALSE	FALSE
CHS.8123.52	CHS.8123.5	MICAL2	877	1124	0.7802	76.9	70.2	1.0954	2842	2560	Blood_Vessel	Skin	14.16708722	54.101147	FALSE	FALSE
CHS.8211.15	CHS.8211.10	KCNC1	528	585	0.9026	76.8	71.4	1.0756	33	1299	Brain	Skin	8.9416836	94.0995	TRUE	TRUE
CHS.8211.9	CHS.8211.10	KCNC1	511	585	0.8735	78.7	71.4	1.1022	2161	1299	Brain	Skin	10.72844151	94.0995	TRUE	TRUE
CHS.8404.16	CHS.8404.6	FBXO3	415	471	0.8811	94.3	87.5	1.0777	9701	9688	Bone_Marrow	Thyroid	6.392903627	28.99707281	TRUE	TRUE
CHS.8404.22	CHS.8404.6	FBXO3	430	471	0.913	93	87.5	1.0629	46	9688	Salivary_Gland	Thyroid	5.35323	28.99707281	TRUE	TRUE
CHS.8409.7	CHS.8409.18	LMO2	158	227	0.696	87	71.7	1.2134	9580	476	Lung	Thyroid	30.1922587	8.193133333	TRUE	FALSE
CHS.8426.2	CHS.8426.6	ELF5	232	255	0.9098	75.4	69.3	1.088	5	1201	Lung	Salivary_Gland	1.90054	55.83603455	TRUE	TRUE
CHS.8462.18	CHS.8462.1	PRR5L	205	368	0.5571	77.8	65.6	1.186	5017	1839	Spleen	Brain	5.497421797	3.527262771	TRUE	TRUE
CHS.851.22	CHS.851.4	LDLRAP1	281	308	0.9123	71	67.2	1.0565	132	9690	Brain	Spleen	2.4314215	84.73355	TRUE	TRUE
CHS.851.7	CHS.851.4	LDLRAP1	278	308	0.9026	70.8	67.2	1.0536	233	9690	Lung	Spleen	3.118289	84.73355	TRUE	TRUE
CHS.858.2	CHS.858.1	SELENON	556	590	0.9424	81.9	76.9	1.065	9629	9231	Thyroid	Muscle	59.84665701	9.007133763	TRUE	FALSE
CHS.8600.5	CHS.8600.7	CSTPP1	274	331	0.8278	86.1	79.5	1.083	9714	9701	Pituitary	Brain	19.26992331	27.49231453	TRUE	TRUE
CHS.8627.10	CHS.8627.5	KBTBD4	541	534	1.0131	84.1	79.4	1.0592	1314	9653	Pituitary	Bladder	1.90177875	11.01729727	TRUE	TRUE
CHS.8627.13	CHS.8627.5	KBTBD4	518	534	0.97	85.1	79.4	1.0718	5631	9653	Pituitary	Bladder	1.84638296	11.01729727	TRUE	TRUE
CHS.8627.7	CHS.8627.5	KBTBD4	543	534	1.0169	84.2	79.4	1.0605	4	9653	Brain	Bladder	2.11886	11.01729727	FALSE	TRUE
CHS.8634.16	CHS.8634.3	AGBL2	819	902	0.908	75.8	71.2	1.0646	2	253	Thyroid	Testis	1.87559	2.599069673	FALSE	FALSE
CHS.8634.21	CHS.8634.3	AGBL2	826	902	0.9157	75	71.2	1.0534	1	253	Lung	Testis	1.10388	2.599069673	FALSE	FALSE
CHS.8634.8	CHS.8634.3	AGBL2	828	902	0.918	75	71.2	1.0534	27	253	Cervix_Uteri	Testis	2.41285	2.599069673	FALSE	FALSE
CHS.8857.5	CHS.8857.1	ZP1	345	638	0.5408	75.1	68.4	1.098	294	81	Testis	Skin	11.32409349	1.918072286	FALSE	FALSE
CHS.888.31	CHS.888.53	UBXN11	477	520	0.9173	72.9	68.9	1.0581	145	6550	Pituitary	Testis	23.86393857	75.51099583	FALSE	FALSE
CHS.888.32	CHS.888.53	UBXN11	469	520	0.9019	72.8	68.9	1.0566	257	6550	Thyroid	Testis	10.466968	75.51099583	FALSE	FALSE
CHS.8896.2	CHS.8896.18	SYT7	403	686	0.5875	77.7	59.2	1.3125	4437	1618	Pituitary	Brain	18.39410377	19.33700461	TRUE	TRUE
CHS.8896.3	CHS.8896.18	SYT7	478	686	0.6968	71.5	59.2	1.2078	2120	1618	Brain	Brain	10.35115909	19.33700461	TRUE	TRUE
CHS.8896.4	CHS.8896.18	SYT7	447	686	0.6516	72.7	59.2	1.228	2620	1618	Prostate	Brain	10.60139092	19.33700461	TRUE	TRUE
CHS.9039.2	CHS.9039.1	VEGFB	188	207	0.9082	81.7	69.5	1.1755	9776	9776	Adipose_Tissue	Adipose_Tissue	79.03928924	146.3264097	TRUE	TRUE
CHS.9156.6	CHS.9156.5	KAT5	494	546	0.9048	76.1	71	1.0718	9780	9760	Bladder	Fallopian_Tube	11.69626973	10.95563829	TRUE	TRUE
CHS.9219.4	CHS.9219.3	PELI3	445	469	0.9488	84.8	80.4	1.0547	8935	9183	Brain	Bladder	16.83300717	7.678109091	FALSE	FALSE
CHS.9412.12	CHS.9412.16	XNDC1N	207	234	0.8846	82.7	75.4	1.0968	251	190	Vagina	Prostate	3.654323333	2.59867	FALSE	FALSE
CHS.9412.20	CHS.9412.16	XNDC1N	134	234	0.5726	85.5	75.4	1.134	327	190	Lung	Prostate	1.563481625	2.59867	FALSE	FALSE
CHS.9412.5	CHS.9412.16	XNDC1N	179	234	0.765	85.3	75.4	1.1313	1564	190	Cervix_Uteri	Prostate	3.227756667	2.59867	FALSE	FALSE
CHS.9471.5	CHS.9471.6	MRPL48	194	212	0.9151	78.3	73.9	1.0595	1993	9756	Cervix_Uteri	Bone_Marrow	0.834641	27.27927941	TRUE	TRUE
CHS.9526.14	CHS.9526.2	DGAT2	358	388	0.9227	90.7	85.7	1.0583	429	8025	Skin	Adipose_Tissue	21.43196474	276.0563644	TRUE	TRUE
CHS.9526.5	CHS.9526.2	DGAT2	360	388	0.9278	90.3	85.7	1.0537	43	8025	Breast	Adipose_Tissue	8.51414	276.0563644	TRUE	TRUE
CHS.9636.13	CHS.9636.54	DLG2	819	975	0.84	71.8	67.2	1.0685	1167	241	Skin	Uterus	14.9935	5.89056	FALSE	FALSE
CHS.9642.1	CHS.9642.4	TMEM126B	210	230	0.913	85.8	77.3	1.11	7085	9737	Bone_Marrow	Bone_Marrow	3.272556436	28.87703922	TRUE	TRUE
CHS.9642.3	CHS.9642.4	TMEM126B	200	230	0.8696	87.3	77.3	1.1294	9747	9737	Bone_Marrow	Bone_Marrow	44.33111667	28.87703922	TRUE	TRUE
CHS.9816.4	CHS.9816.6	TRPC6	845	931	0.9076	77.9	73.7	1.057	463	3683	Lung	Lung	4.477793267	16.84417586	TRUE	TRUE
CHS.9827.4	CHS.9827.3	BIRC2	569	618	0.9207	76.3	71.3	1.0701	2857	9762	Testis	Nerve	0.897096138	38.06036416	FALSE	FALSE
CHS.9866.4	CHS.9866.5	CASP5	376	434	0.8664	80.3	74.3	1.0808	752	644	Prostate	Small_Intestine	8.70263	10.98806928	FALSE	FALSE
CHS.9867.8	CHS.9867.11	CASP1	383	404	0.948	83.8	79.6	1.0528	7973	9008	Spleen	Spleen	22.25173653	50.57550941	TRUE	FALSE
CHS.9971.11	CHS.9971.7	DIXDC1	472	683	0.6911	73.3	68.5	1.0701	8189	6051	Bladder	Brain	44.25824545	9.870913299	TRUE	TRUE
